# Supplementary material for: Identification of Silkworm Hemocyte Subsets and Analysis of Their Response to Baculovirus Infection Based on Single-Cell RNA Sequencing
Source: Front Immunol. 2021 Apr 30;12:645359. doi: 10.3389/fimmu.2021.645359 (PMC8119652; doi:10.3389/fimmu.2021.645359)
Supplement: Supplementary File 4 — Immune-related DEGs selected from clusters 0 to 19 and their distribution in each cluster. [file Table_4.xlsx]

## Sheet: All of immune-related DEGs
All of the immune-related DEGs selected from cluste 0 to 19
Gene ID	Common Name	Brief Description
BMSK0015395	CECB1,CECB2	Cecropin family
BMSK0009812	gloverin	gloverin 2 isoform X1
BMSK0004770	Dredd	caspase-8
BMSK0000352	Cat	catalase
BMSK0003908	hemocyte protease-1	hemocyte protease-1
BMSK0014477	LGALS4	galectin-5-like
BMSK0006301	gnbp1	beta-1,3-glucan recognition protein 2 precursor
BMSK0007167	IG10	vegetative cell wall protein gp1
BMSK0012695	Fadd	ADM32518.1 fadd
BMSK0005070	NF-kB p110	nuclear factor NF-kappa-B p110 subunit isoform 1
BMSK0014876	kay	transcription factor kayak, isoforms A/B/F isoform X3 [Papilio xuthus]
BMSK0000215	PGRP-SC2	XP 004929814.1 peptidoglycan-recognition protein SC2 isoform X1
BMSK0004739	PGRP7	peptidoglycan recognition protein precursor
BMSK0002091	profilin protein	profilin protein
BMSK0011139	PPIB	ABF51475.1 peptidylprolyl isomerase B
BMSK0008933	Glipr2	SCP-related protein
BMSK0006833	Scarb1	scavenger receptor class B member 3
BMSK0013677	SCRB6	Lysosome membrane protein 2 [Papilio xuthus]
BMSK0013048	SOD1	SODC BOMMO RecName: Full=Superoxide dismutase [Cu-Zn]
BMSK0001239	Sod2	Mn superoxide dismutase
BMSK0003812	Spn27A	serine protease inhibitor 3 isoform X1
BMSK0008651	Spn88Ea	serine protease inhibitor 6 isoform X1
BMSK0015993	Spn77Ba	AAS68505.1 serpin-4A
BMSK0008627	Spn4	serine protease inhibitor 2 isoform X1
BMSK0009031	Jafrac1	thiol peroxiredoxin isoform X1
BMSK0006970	AGO2	argonaute 2 isoform X1
BMSK0007079	Siwi	piwi-like protein, partial
BMSK0006570	Rm62/DEAD	DEAD box polypeptide 5 isoform 1
BMSK0012472	eIF4E1	ABL75549.1 eukaryotic initiation factor 4E-1
BMSK0000848	Tsn	translin
BMSK0015652	Malrd1	scavenger receptor type C precursor
BMSK0009108	Carboxypeptidase	Venom serine carboxypeptidase
BMSK0013303	dicer-2	XP 021207858.1 dicer-2 isoform X1
BMSK0006548	DDX5	ATP-dependent R helicase dbp2 isoform X1
BMSK0009931	gw	protein Gawky [Papilio xuthus]
BMSK0000480	Tudor-SN	tudor staphylococcus/micrococcal nuclease
BMSK0015392	CECB1,CECB2	Cecropin family
BMSK0015401	CECB1,CECB2	Cecropin family
BMSK0015404	CECB1,CECB2	AAB30910.1 cecropin=antibacterial peptide [Bombyx mori=silkworms, integument extracellular matrix, Peptide, 35 aa]
BMSK0001039	Lman1	protein ERGIC-53
BMSK0013377	CSA	glutathione peroxidase
BMSK0015851	JHEH	juvenile hormone epoxide hydrolase-like protein 3 isoform X1
BMSK0003398	Pxd	peroxidase-like [Amyelois transitella]
BMSK0010357	survivin-2	ADM32525.1 survivin-2
BMSK0007905	Tl	protein toll-like isoform X1
BMSK0000500	PRDX6	Cys peroxiredoxin
BMSK0008583	PRMT5	protein arginine N-methyltransferase 5 isoform X4
BMSK0013523	Wee1	wee1-like protein kinase [Amyelois transitella]
BMSK0015667	Hsp83	heat shock protein 83
BMSK0011478	CASP3	AEK71902.1 caspase-4
BMSK0006300	GNBP2	beta-1,3-glucan recognition protein 1 [Helicoverpa armigera]
BMSK0009085	PPO1	pro-phenol oxidase [Bombyx mandarina]
BMSK0009475	PPO3	PRP2 BOMMO RecName: Full=Phenoloxidase subunit 2; AltName: Full=PO 2; AltName: Full=Tyrosinase 2; Flags: Precursor
BMSK0005167	spatzle-1	spatzle-1 isoform X1
BMSK0015767	SERPINE2	ACG61172.1 serpin-7
BMSK0006730	Tsnax	translin-associated protein X
BMSK0005322	Serbp1	Vasa intronic protein [Operophtera brumata]
BMSK0004353	dbe	KRR1 small subunit processome component homolog
BMSK0006571	Rm62	ATP-dependent R helicase p62-like [Amyelois transitella]
BMSK0012177	ELP1	elongator complex protein 1
BMSK0002726	Ars2	serrate R effector molecule homolog isoform X1
BMSK0000207	EXOSC10	exosome component 10 [Amyelois transitella]
BMSK0007809	XPO5	exportin-5 [Plutella xylostella]
BMSK0014698	APMAP	uncharacterized protein LOC106721620 [Papilio machaon]
BMSK0008728	bel	putative ATP-dependent R helicase Pl10 [Amyelois transitella]
BMSK0015393	CECB1,CECB2	Cecropin family
BMSK0015397	CECB1,CECB2	Cecropin family
BMSK0010780	promoting protein	AAQ01563.1 promoting protein
BMSK0000216	PGRP	peptidoglycan-recognition protein 1-like isoform X2 [Papilio machaon]
BMSK0005146	PRDX4	thioredoxin reductase protein
BMSK0013258	IAP	inhibitor of apoptosis protein isoform X1
BMSK0013252	ASNS	XP 012551318.1 asparagine synthetase isoform X1
BMSK0014074	PPAF2	ABF51436.1 serine proteinase-like protein
BMSK0006789	Tmprss2	transmembrane protease serine 2-like
BMSK0015954	PPAE	serine protease easter-like
BMSK0005454	C-type lectin 10	C-type lectin 10 precursor
BMSK0006299	GNBP1	beta-1,3-glucan recognition protein 3 isoform X2
BMSK0000290	Pxn	peroxidasin isoform X2
BMSK0009859	dome	cytokine receptor
BMSK0012809	AT	ACT36278.1 antitrypsin isoform 3
BMSK0003511	CECA	Cecropin family
BMSK0014790	eIF3d	serine protease easter-like
BMSK0015957	PPAE	prophenoloxidase activating enzyme precursor
BMSK0006963	Sp7	serine protease 7
BMSK0010425	lectin 5 precursor	lectin 5 precursor
BMSK0003056	Nrg	neuroglian [Mythimna separata]
BMSK0006713	DFP	ABJ09465.1 immune-related protein
BMSK0003816	SERPINB1	serine protease inhibitor 12 isoform X1
BMSK0003813	Spn42Dd	serine protease inhibitor 11 precursor
BMSK0004848	PGRP	peptidoglycan recognition protein S2
BMSK0015239	C-type lectin 21	XP 004922068.1 macrophage mannose receptor 1
BMSK0015240	C-type_lectin	Lectin C-type domain
BMSK0009347	PGRP-LB

## Sheet: cluster 0
Gene ID	Gene Name	Target_Cluster_mean	Other_Cluster_mean	Log2FC	Pvalue	Qvalue	Description
BMSK0015395	CECB1,CECB2	3.40911	1.3649	1.3206	2.30672e-126	3.70967e-122	Cecropin family
BMSK0009812	gloverin	1.46059	1.07556	0.441466	1.466e-75	2.35762e-71	gloverin 2 isoform X1
BMSK0004770	Dredd	3.18108	1.55266	1.03477	0	0	caspase-8
BMSK0000352	Cat	1.03373	0.561848	0.879605	1.27012e-57	2.0426e-53	catalase
BMSK0003908	hemocyte protease-1	142.799	44.7156	1.67514	0	0	hemocyte protease-1
BMSK0014477	LGALS4	2.41903	1.16605	1.05279	2.02961e-282	3.26401e-278	galectin-5-like
BMSK0006301	gnbp1	2.378	1.07186	1.14964	4.95605e-196	7.97032e-192	beta-1,3-glucan recognition protein 2 precursor
BMSK0007167	IG10	4.13256	1.47654	1.48481	0	0	vegetative cell wall protein gp1
BMSK0012695	Fadd	2.76465	1.48429	0.897319	2.75356e-261	4.42828e-257	ADM32518.1 fadd
BMSK0005070	NF-kB p110	0.857798	0.443738	0.950929	1.12298e-78	1.80597e-74	nuclear factor NF-kappa-B p110 subunit isoform 1
BMSK0014876	kay	1.49393	1.09605	0.446794	1.03522e-179	1.66484e-175	transcription factor kayak, isoforms A/B/F isoform X3 [Papilio xuthus]
BMSK0000215	PGRP-SC2	1.49134	0.650987	1.19591	5.06552e-252	8.14636e-248	XP 004929814.1 peptidoglycan-recognition protein SC2 isoform X1
BMSK0004739	PGRP7	9.60601	5.73695	0.743654	1.85517e-305	2.98349e-301	peptidoglycan recognition protein precursor
BMSK0002091	profilin protein	25.6179	12.2087	1.06924	0	0	profilin protein
BMSK0011139	PPIB	12.2296	5.16245	1.24426	0	0	ABF51475.1 peptidylprolyl isomerase B
BMSK0008933	Glipr2	2.06869	0.589925	1.81011	0	0	SCP-related protein
BMSK0006833	Scarb1	3.32253	1.16569	1.5111	0	0	scavenger receptor class B member 3
BMSK0013677	SCRB6	1.34184	0.652518	1.04013	4.7746e-171	7.67851e-167	Lysosome membrane protein 2 [Papilio xuthus]
BMSK0013048	SOD1	3.63054	2.13613	0.76518	0	0	SODC BOMMO RecName: Full=Superoxide dismutase [Cu-Zn]
BMSK0001239	Sod2	1.21675	0.912892	0.414521	2.76244e-56	4.44256e-52	Mn superoxide dismutase
BMSK0003812	Spn27A	1.46755	0.621995	1.23844	1.84176e-205	2.96191e-201	serine protease inhibitor 3 isoform X1
BMSK0008651	Spn88Ea	1.66906	0.627385	1.41161	0	0	serine protease inhibitor 6 isoform X1
BMSK0015993	Spn77Ba	2.39718	1.19325	1.00644	2.34738e-284	3.77506e-280	AAS68505.1 serpin-4A
BMSK0008627	Spn4	1.04202	0.536712	0.95716	3.99655e-151	6.42725e-147	serine protease inhibitor 2 isoform X1
BMSK0009031	Jafrac1	7.98222	4.83657	0.722805	0	0	thiol peroxiredoxin isoform X1
BMSK0006970	AGO2	1.88655	0.826332	1.19095	3.71038e-183	5.96703e-179	argonaute 2 isoform X1
BMSK0007079	Siwi	0.857105	0.464677	0.883244	1.87487e-49	3.01516e-45	piwi-like protein, partial
BMSK0006570	Rm62/DEAD	14.3863	10.1144	0.508288	1.72067e-197	2.76718e-193	DEAD box polypeptide 5 isoform 1
BMSK0012472	eIF4E1	7.28662	3.21364	1.18104	0	0	ABL75549.1 eukaryotic initiation factor 4E-1
BMSK0000848	Tsn	0.814796	0.510946	0.67327	6.11818e-28	9.83926e-24	translin
BMSK0015652	Malrd1	24.7523	7.74964	1.67536	0	0	scavenger receptor type C precursor
BMSK0009108	Carboxypeptidase	2.50673	1.04294	1.26516	3.67537e-286	5.91073e-282	venom serine carboxypeptidase

## Sheet: 1
ns(non-significant)

## Sheet: 2
ns(non-significant)

## Sheet: 3
Gene ID	Gene Name	Target_Cluster_mean	Other_Cluster_mean	Log2FC	Pvalue	Qvalue	Description
BMSK0013303	dicer-2	4.37269	2.51053	0.800527	2.10493e-100	3.38514e-96	XP 021207858.1 dicer-2 isoform X1
BMSK0006548	DDX5	5.28485	3.66381	0.528518	2.46189e-139	3.95922e-135	ATP-dependent R helicase dbp2 isoform X1
BMSK0009931	gw	2.57705	1.17085	1.13817	4.18761e-60	6.73452e-56	protein Gawky [Papilio xuthus]
BMSK0000480	Tudor-SN	3.20858	2.23856	0.519363	1.40933e-124	2.26649e-120	tudor staphylococcus/micrococcal nuclease

## Sheet: 4
Gene ID	Gene Name	Target_Cluster_mean	Other_Cluster_mean	Log2FC	Pvalue	Qvalue	Description
BMSK0015392	CECB1,CECB2	2.28814	0.554929	2.0438	0	0	Cecropin family
BMSK0015395	CECB1,CECB2	5.13713	1.3761	1.90037	0	0	Cecropin family
BMSK0015401	CECB1,CECB2	4.04325	1.2402	1.70494	8.01175e-225	1.28845e-220	Cecropin family
BMSK0015404	CECB1,CECB2	1.54866	0.43494	1.83213	6.46236e-248	1.03928e-243	AAB30910.1 cecropin=antibacterial peptide [Bombyx mori=silkworms, integument extracellular matrix, Peptide, 35 aa]
BMSK0009812	gloverin	1.45946	1.10367	0.403132	1.78115e-94	2.86445e-90	gloverin 2 isoform X1
BMSK0004770	Dredd	3.39406	1.6542	1.03688	7.4019e-292	1.19037e-287	caspase-8
BMSK0000352	Cat	1.08422	0.592163	0.872589	2.53832e-101	4.08213e-97	catalase
BMSK0003908	hemocyte protease-1	133.342	52.605	1.34186	0	0	hemocyte protease-1
BMSK0001039	Lman1	0.649451	0.438386	0.567021	1.04112e-69	1.67433e-65	protein ERGIC-53
BMSK0014477	LGALS4	2.22493	1.27267	0.805898	1.05284e-191	1.69317e-187	galectin-5-like
BMSK0006301	gnbp1	2.89417	1.12581	1.36219	0	0	beta-1,3-glucan recognition protein 2 precursor
BMSK0013377	CSA	1.44425	1.08272	0.415659	2.62388e-119	4.21972e-115	glutathione peroxidase
BMSK0015851	JHEH	0.637328	0.360866	0.820575	2.35006e-158	3.77937e-154	juvenile hormone epoxide hydrolase-like protein 3 isoform X1
BMSK0003398	Pxd	0.66551	0.39792	0.741982	2.36075e-91	3.79656e-87	peroxidase-like [Amyelois transitella]
BMSK0010357	survivin-2	1.75734	0.233043	2.91473	0	0	ADM32525.1 survivin-2
BMSK0007167	IG10	3.68214	1.70565	1.11023	3.62153e-302	5.82415e-298	vegetative cell wall protein gp1
BMSK0012695	Fadd	2.67889	1.58428	0.757814	1.17984e-211	1.89741e-207	ADM32518.1 fadd
BMSK0005070	NF-kB p110	0.789679	0.479287	0.720375	2.21315e-97	3.55919e-93	nuclear factor NF-kappa-B p110 subunit isoform 1
BMSK0000215	PGRP-SC2	1.18662	0.736385	0.688329	4.22651e-147	6.79707e-143	XP 004929814.1 peptidoglycan-recognition protein SC2 isoform X1
BMSK0004739	PGRP7	10.5827	5.94073	0.832989	6.15324e-227	9.89564e-223	peptidoglycan recognition protein precursor
BMSK0002091	profilin protein	30.2064	12.8192	1.23655	0	0	profilin protein
BMSK0011139	PPIB	12.8268	5.62913	1.18818	0	0	ABF51475.1 peptidylprolyl isomerase B
BMSK0008933	Glipr2	1.97322	0.705119	1.48461	0	0	SCP-related protein
BMSK0006833	Scarb1	2.29722	1.40423	0.710115	2.5564e-222	4.1112e-218	scavenger receptor class B member 3
BMSK0013677	SCRB6	1.03341	0.727222	0.506948	5.33025e-117	8.57211e-113	Lysosome membrane protein 2 [Papilio xuthus]
BMSK0013048	SOD1	4.10689	2.20695	0.89599	8.09927e-299	1.30253e-294	SODC BOMMO RecName: Full=Superoxide dismutase [Cu-Zn]
BMSK0001239	Sod2	1.31445	0.927226	0.503465	2.83859e-94	4.56503e-90	Mn superoxide dismutase
BMSK0003812	Spn27A	1.2658	0.699577	0.855491	9.49962e-175	1.52773e-170	serine protease inhibitor 3 isoform X1
BMSK0008651	Spn88Ea	1.37654	0.72646	0.922096	1.84335e-183	2.96447e-179	serine protease inhibitor 6 isoform X1
BMSK0015993	Spn77Ba	2.16811	1.29908	0.738944	3.40505e-199	5.476e-195	AAS68505.1 serpin-4A
BMSK0008627	Spn4	0.798426	0.592867	0.429452	3.16872e-87	5.09594e-83	serine protease inhibitor 2 isoform X1
BMSK0007905	Tl	0.538014	0.264029	1.02695	1.68611e-90	2.7116e-86	protein toll-like isoform X1
BMSK0009031	Jafrac1	9.24768	4.96473	0.897376	4.06324e-276	6.5345e-272	thiol peroxiredoxin isoform X1
BMSK0000500	PRDX6	0.616508	0.36677	0.749246	4.4388e-50	7.13848e-46	Cys peroxiredoxin
BMSK0006970	AGO2	2.05685	0.88992	1.20869	5.09424e-225	8.19256e-221	argonaute 2 isoform X1
BMSK0007079	Siwi	1.28292	0.45934	1.4818	6.02717e-275	9.69289e-271	piwi-like protein, partial
BMSK0008583	PRMT5	0.635768	0.430681	0.561881	1.19275e-66	1.91819e-62	protein arginine N-methyltransferase 5 isoform X4
BMSK0006570	Rm62/DEAD	15.7586	10.316	0.611256	1.22375e-153	1.96803e-149	DEAD box polypeptide 5 isoform 1
BMSK0012472	eIF4E1	8.57417	3.40752	1.33128	0	0	ABL75549.1 eukaryotic initiation factor 4E-1
BMSK0000848	Tsn	0.851834	0.530106	0.68429	6.49765e-77	1.04495e-72	translin
BMSK0015652	Malrd1	22.5845	9.1593	1.30202	0	0	scavenger receptor type C precursor
BMSK0013523	Wee1	0.817736	0.299354	1.44978	1.71694e-286	2.76118e-282	wee1-like protein kinase [Amyelois transitella]
BMSK0009108	Carboxypeptidase	2.37699	1.15977	1.0353	2.79604e-222	4.49659e-218	venom serine carboxypeptidase
BMSK0015667	Hsp83	62.5453	44.4975	0.491178	1.4379e-205	2.31244e-201	heat shock protein 83

## Sheet: 5
Gene ID	Gene Name	Target_Cluster_mean	Other_Cluster_mean	Log2FC	Pvalue	Qvalue	Description
BMSK0009812	gloverin	1.43005	1.10807	0.368021	3.21803e-230	5.17523e-226	gloverin 2 isoform X1
BMSK0011478	CASP3	2.20124	0.437895	2.32966	0	0	AEK71902.1 caspase-4
BMSK0000352	Cat	1.06103	0.596976	0.829722	0	0	catalase
BMSK0006300	GNBP2	0.414378	0.219014	0.919922	0	0	beta-1,3-glucan recognition protein 1 [Helicoverpa armigera]
BMSK0013377	CSA	1.89963	1.0519	0.852725	0	0	glutathione peroxidase
BMSK0009085	PPO1	267.599	70.8928	1.91636	0	0	pro-phenol oxidase [Bombyx mandarina]
BMSK0009475	PPO3	434.173	63.9467	2.76333	0	0	PRP2 BOMMO RecName: Full=Phenoloxidase subunit 2; AltName: Full=PO 2; AltName: Full=Tyrosinase 2; Flags: Precursor
BMSK0005167	spatzle-1	1.52537	0.256437	2.57248	0	0	spatzle-1 isoform X1
BMSK0015767	SERPINE2	1.37584	0.405428	1.7628	0	0	ACG61172.1 serpin-7
BMSK0009031	Jafrac1	8.04975	5.07907	0.66438	1.1225e-178	1.8052e-174	thiol peroxiredoxin isoform X1
BMSK0000500	PRDX6	0.533424	0.374399	0.510705	8.76563e-307	1.40969e-302	Cys peroxiredoxin
BMSK0006730	Tsnax	0.202863	0.150716	0.42867	1.71055e-184	2.75091e-180	translin-associated protein X
BMSK0005322	Serbp1	26.5901	13.8147	0.944683	0	0	Vasa intronic protein [Operophtera brumata]
BMSK0015667	Hsp83	186.339	35.6085	2.38764	0	0	heat shock protein 83

## Sheet: 6
Gene ID	Gene Name	Target_Cluster_mean	Other_Cluster_mean	Log2FC	Pvalue	Qvalue	Description
BMSK0009812	gloverin	2.44498	1.04423	1.22739	0	0	gloverin 2 isoform X1
BMSK0011478	CASP3	0.825898	0.539962	0.613105	1.68365e-242	2.70764e-238	AEK71902.1 caspase-4
BMSK0004770	Dredd	2.29121	1.74932	0.389316	4.09536e-205	6.58615e-201	caspase-8
BMSK0000352	Cat	0.825163	0.615624	0.422629	3.37601e-232	5.42929e-228	catalase
BMSK0006300	GNBP2	0.608804	0.20773	1.55126	0	0	beta-1,3-glucan recognition protein 1 [Helicoverpa armigera]
BMSK0010357	survivin-2	0.448128	0.338728	0.403784	2.12494e-145	3.41734e-141	ADM32525.1 survivin-2
BMSK0004353	dbe	0.814176	0.359122	1.18087	0	0	KRR1 small subunit processome component homolog
BMSK0004739	PGRP7	11.3825	5.95075	0.935669	2.34708e-232	3.77458e-228	peptidoglycan recognition protein precursor
BMSK0013048	SOD1	3.33421	2.28272	0.546594	1.71431e-243	2.75695e-239	SODC BOMMO RecName: Full=Superoxide dismutase [Cu-Zn]
BMSK0001239	Sod2	1.666	0.909507	0.873232	0	0	Mn superoxide dismutase
BMSK0015767	SERPINE2	1.23406	0.421528	1.54972	2.36236e-217	3.79914e-213	ACG61172.1 serpin-7
BMSK0009031	Jafrac1	7.47496	5.13753	0.540992	3.48787e-124	5.60919e-120	thiol peroxiredoxin isoform X1
BMSK0000500	PRDX6	0.594205	0.371565	0.677348	0	0	Cys peroxiredoxin
BMSK0006970	AGO2	1.39113	0.948904	0.551921	5.22386e-246	8.40101e-242	argonaute 2 isoform X1
BMSK0008583	PRMT5	0.893905	0.416609	1.10143	0	0	protein arginine N-methyltransferase 5 isoform X4
BMSK0006570	Rm62/DEAD	18.1279	10.2345	0.824778	5.69284e-229	9.15523e-225	DEAD box polypeptide 5 isoform 1
BMSK0006571	Rm62	1.15154	0.381314	1.59452	0	0	ATP-dependent R helicase p62-like [Amyelois transitella]
BMSK0012177	ELP1	0.306751	0.159	0.948043	4.97157e-274	7.99527e-270	elongator complex protein 1
BMSK0012472	eIF4E1	5.29988	3.68996	0.522357	1.38595e-138	2.22889e-134	ABL75549.1 eukaryotic initiation factor 4E-1
BMSK0006730	Tsnax	0.276928	0.146261	0.920968	4.35912e-238	7.01034e-234	translin-associated protein X
BMSK0000848	Tsn	1.04148	0.522057	0.996355	0	0	translin
BMSK0000480	Tudor-SN	3.38918	2.2445	0.594541	0	0	tudor staphylococcus/micrococcal nuclease
BMSK0005322	Serbp1	28.184	13.8012	1.03008	0	0	Vasa intronic protein [Operophtera brumata]
BMSK0002726	Ars2	0.494731	0.297884	0.731892	0	0	serrate R effector molecule homolog isoform X1
BMSK0000207	EXOSC10	0.414234	0.207639	0.996372	0	0	exosome component 10 [Amyelois transitella]
BMSK0007809	XPO5	0.522054	0.239686	1.12305	0	0	exportin-5 [Plutella xylostella]
BMSK0015667	Hsp83	104.97	41.9753	1.32237	0	0	heat shock protein 83

## Sheet: 7
Gene ID	Gene Name	Target_Cluster_mean	Other_Cluster_mean	Log2FC	Pvalue	Qvalue	Description
BMSK0015395	CECB1,CECB2	4.94306	1.45458	1.7648	4.80482e-65	7.72711e-61	Cecropin family
BMSK0003908	hemocyte protease-1	283.437	44.9677	2.65607	0	0	hemocyte protease-1
BMSK0014698	APMAP	1.51492	0.753774	1.00704	6.04411e-11	9.72013e-07	uncharacterized protein LOC106721620 [Papilio machaon]
BMSK0006301	gnbp1	6.03622	0.967322	2.64158	1.03729e-237	1.66817e-233	beta-1,3-glucan recognition protein 2 precursor
BMSK0007167	IG10	5.15409	1.65178	1.6417	1.84635e-157	2.9693e-153	vegetative cell wall protein gp1
BMSK0000215	PGRP-SC2	1.78968	0.707933	1.33802	2.21359e-36	3.55989e-32	XP 004929814.1 peptidoglycan-recognition protein SC2 isoform X1
BMSK0004739	PGRP7	18.8457	5.52378	1.77051	0	0	peptidoglycan recognition protein precursor
BMSK0011139	PPIB	28.1964	4.82809	2.54599	0	0	ABF51475.1 peptidylprolyl isomerase B
BMSK0009085	PPO1	131.627	81.3654	0.693974	5.34961e-291	8.60325e-287	pro-phenol oxidase [Bombyx mandarina]
BMSK0009475	PPO3	120.071	87.1735	0.461923	2.7513e-265	4.42465e-261	PRP2 BOMMO RecName: Full=Phenoloxidase subunit 2; AltName: Full=PO 2; AltName: Full=Tyrosinase 2; Flags: Precursor
BMSK0006833	Scarb1	4.45619	1.28961	1.78888	1.89404e-178	3.04599e-174	scavenger receptor class B member 3
BMSK0013677	SCRB6	1.65485	0.695103	1.2514	7.91586e-29	1.27303e-24	Lysosome membrane protein 2 [Papilio xuthus]
BMSK0003812	Spn27A	2.72699	0.621326	2.13389	4.67752e-133	7.5224e-129	serine protease inhibitor 3 isoform X1
BMSK0008651	Spn88Ea	2.63128	0.662174	1.99048	9.45726e-128	1.52092e-123	serine protease inhibitor 6 isoform X1
BMSK0015993	Spn77Ba	4.10439	1.1975	1.77715	2.86943e-136	4.61461e-132	AAS68505.1 serpin-4A
BMSK0012472	eIF4E1	7.04675	3.59152	0.972364	2.4332e-95	3.91308e-91	ABL75549.1 eukaryotic initiation factor 4E-1
BMSK0015652	Malrd1	43.6957	8.12182	2.42761	0	0	scavenger receptor type C precursor
BMSK0009108	Carboxypeptidase	5.10337	1.01662	2.32767	5.09896e-185	8.20015e-181	venom serine carboxypeptidase

## Sheet: 8
Gene ID	Gene Name	Target_Cluster_mean	Other_Cluster_mean	Log2FC	Pvalue	Qvalue	Description
BMSK0004770	Dredd	2.27956	1.75482	0.377431	2.23755e-21	3.59844e-17	caspase-8
BMSK0000352	Cat	1.08897	0.60283	0.85314	3.67759e-26	5.9143e-22	catalase
BMSK0014477	LGALS4	1.70358	1.32282	0.364957	2.22463e-33	3.57765e-29	galectin-5-like
BMSK0013377	CSA	1.45414	1.0902	0.415566	1.73569e-27	2.79134e-23	glutathione peroxidase
BMSK0007167	IG10	4.72196	1.69173	1.48089	4.95439e-07	0.00796765	vegetative cell wall protein gp1
BMSK0009085	PPO1	319.368	71.154	2.1662	0	0	pro-phenol oxidase [Bombyx mandarina]
BMSK0009475	PPO3	267.512	79.1242	1.75741	0	0	PRP2 BOMMO RecName: Full=Phenoloxidase subunit 2; AltName: Full=PO 2; AltName: Full=Tyrosinase 2; Flags: Precursor
BMSK0006970	AGO2	1.4966	0.946998	0.660255	2.04867e-30	3.29466e-26	argonaute 2 isoform X1
BMSK0008728	bel	2.32364	1.54087	0.592645	1.63979e-12	2.6371e-08	putative ATP-dependent R helicase Pl10 [Amyelois transitella]
BMSK0009931	gw	1.79232	1.25252	0.516999	6.26131e-09	0.000100694	protein Gawky [Papilio xuthus]
BMSK0015652	Malrd1	14.427	9.91116	0.541641	1.34913e-24	2.16968e-20	scavenger receptor type C precursor
BMSK0015667	Hsp83	76.2832	44.1345	0.789459	2.8014e-229	4.50522e-225	heat shock protein 83

[truncated: 11 more sheets: 9, 10, 11, 12, 13, 14, 15, 16, 17, 18, 19]
