# Supplementary material for: Identification of Silkworm Hemocyte Subsets and Analysis of Their Response to Baculovirus Infection Based on Single-Cell RNA Sequencing
Source: Front Immunol. 2021 Apr 30;12:645359. doi: 10.3389/fimmu.2021.645359 (PMC8119652; doi:10.3389/fimmu.2021.645359)
Supplement: Supplementary File 6 — Properties of identified DEGs in clusters 0, 1, 2, 3, 4, 5, 6, 7, 8, 10, 11, 14, 15 and 19 between the BmNPV-infected and control groups. [file Table_6.xlsx]

## Sheet: cluster 0
Cluster	GeneID	CK	BmNPV	cells.1	cells.2	pct.1	pct.2	log2FC	p_value	p_val_adjust	significance	Symbol	Description	KEGG_A_class	KEGG_B_class	Pathway	K_ID	GO Component	GO Function	GO Process
0	BMSK0000847	1.54517	15.1515	3140	5	0.452	0.2	3.29362	3.08185e-15	4.95624e-11	up	NDUFA8	DH dehydrogenase [ubiquinone] 1 alpha subcomplex subunit 8	Metabolism;Organismal Systems;Human Diseases;Human Diseases;Human Diseases;Metabolism;Human Diseases;Organismal Systems	Global and overview maps;Environmental adaptation;Neurodegenerative diseases;Neurodegenerative diseases;Neurodegenerative diseases;Energy metabolism;Endocrine and metabolic diseases;Nervous system	ko01100//Metabolic pathways;ko04714//Thermogenesis;ko05016//Huntington disease;ko05010//Alzheimer disease;ko05012//Parkinson disease;ko00190//Oxidative phosphorylation;ko04932//Non-alcoholic fatty liver disease (NAFLD);ko04723//Retrograde endocannabinoid signaling	K03952;K03952;K03952;K03952;K03952;K03952;K03952;K03952	GO:0005739//mitochondrion;GO:0005747//mitochondrial respiratory chain complex I;GO:0005758//mitochondrial intermembrane space	-	GO:0006120//mitochondrial electron transport, NADH to ubiquinone;GO:0032981//mitochondrial respiratory chain complex I assembly
0	BMSK0004845	1.68624	13.7013	3140	5	0.467	0.4	3.02244	1.10543e-13	1.77775e-09	up	-	cytochrome b-c1 complex subunit 10	Metabolism;Organismal Systems;Human Diseases;Human Diseases;Human Diseases;Metabolism;Human Diseases;Organismal Systems	Global and overview maps;Environmental adaptation;Neurodegenerative diseases;Neurodegenerative diseases;Neurodegenerative diseases;Energy metabolism;Endocrine and metabolic diseases;Circulatory system	ko01100//Metabolic pathways;ko04714//Thermogenesis;ko05016//Huntington disease;ko05010//Alzheimer disease;ko05012//Parkinson disease;ko00190//Oxidative phosphorylation;ko04932//Non-alcoholic fatty liver disease (NAFLD);ko04260//Cardiac muscle contraction	K00420;K00420;K00420;K00420;K00420;K00420;K00420;K00420	-	-	-
0	BMSK0015133	1.02015	33.4417	3140	5	0.315	0.4	5.03479	3.22435e-13	5.18539e-09	up	Pprc1	XP 012551701.1 serine/arginine-rich splicing factor 4	-	-	-	-	GO:0005634//nucleus;GO:0005654//nucleoplasm	GO:0003712//transcription cofactor activity;GO:0003723//RNA binding;GO:0008134//transcription factor binding;GO:0030374//ligand-dependent nuclear receptor transcription coactivator activity	GO:0045944//positive regulation of transcription from RNA polymerase II promoter;GO:0051091//positive regulation of sequence-specific DNA binding transcription factor activity
0	BMSK0003607	0.660538	10.6385	3140	5	0.225	0.4	4.00952	3.84379e-13	6.18158e-09	up	Timm17b	mitochondrial import inner membrane translocase	-	-	-	-	GO:0005739//mitochondrion;GO:0005743//mitochondrial inner membrane;GO:0005744//mitochondrial inner membrane presequence translocase complex;GO:0031305//integral component of mitochondrial inner membrane	GO:0015450//P-P-bond-hydrolysis-driven protein transmembrane transporter activity	GO:0030150//protein import into mitochondrial matrix
0	BMSK0005430	1.00114	10.6385	3140	5	0.313	0.4	3.40959	1.79814e-12	2.89176e-08	up	Glod4	cytosolic juvenile hormone binding protein 36 kDa subunit	-	-	-	-	GO:0005739//mitochondrion	-	-
0	BMSK0010731	0.935132	10.5256	3140	5	0.3	0.4	3.49259	1.83753e-12	2.95512e-08	up	MGME1	mitochondrial genome maintenance exonuclease 1-like [Amyelois transitella]	-	-	-	-	GO:0005739//mitochondrion	GO:0008297//single-stranded DNA exodeoxyribonuclease activity	GO:0000002//mitochondrial genome maintenance;GO:0006264//mitochondrial DNA replication;GO:0043504//mitochondrial DNA repair
0	BMSK0008509	0.850724	7.57576	3140	5	0.29	0.2	3.15463	2.64932e-12	4.26063e-08	up	-	39S ribosomal protein L30, mitochondrial	Genetic Information Processing	Translation	ko03010//Ribosome	K02907	-	-	-
0	BMSK0014308	2.28456	13.4755	3140	5	0.565	0.4	2.56034	2.07896e-11	3.34338e-07	up	TAF10	Transcription initiation factor TFIID subunit 10 [Operophtera brumata]	Human Diseases;Genetic Information Processing	Infectious diseases;Transcription	ko05168//Herpes simplex infection;ko03022//Basal transcription factors	K03134;K03134	GO:0000125//PCAF complex;GO:0005634//nucleus;GO:0005654//nucleoplasm;GO:0005669//transcription factor TFIID complex;GO:0005737//cytoplasm;GO:0030914//STAGA complex;GO:0033276//transcription factor TFTC complex;GO:0048471//perinuclear region of cytoplasm	GO:0003677//DNA binding;GO:0019899//enzyme binding;GO:0030331//estrogen receptor binding;GO:0070063//RNA polymerase binding	GO:0000082//G1/S transition of mitotic cell cycle;GO:0006352//DNA-templated transcription, initiation;GO:0006366//transcription from RNA polymerase II promoter;GO:0006367//transcription initiation from RNA polymerase II promoter;GO:0006915//apoptotic process;GO:0010468//regulation of gene expression;GO:0016578//histone deubiquitination;GO:0016579//protein deubiquitination;GO:0034622//cellular mac…
0	BMSK0001518	0.0928703	9.7426	3140	5	0.034	0.4	6.71295	2.77249e-11	4.45871e-07	up	GST2	uncharacterized protein LOC105841373	-	-	-	-	-	GO:0004364//glutathione transferase activity	-
0	BMSK0007775	0.43661	9.7426	3140	5	0.146	0.4	4.47989	4.44174e-11	7.14321e-07	up	Fgop2	FGFR1 oncogene partner 2 homolog	-	-	-	-	GO:0090443//FAR/SIN/STRIPAK complex	-	GO:0035331//negative regulation of hippo signaling;GO:0046579//positive regulation of Ras protein signal transduction
0	BMSK0006399	0.85145	7.57576	3140	5	0.28	0.2	3.1534	6.6743e-11	1.07336e-06	up	Gnl2	nucleolar GTP-binding protein 2	Genetic Information Processing	Translation	ko03008//Ribosome biogenesis in eukaryotes	K14537	GO:0005730//nucleolus	GO:0005525//GTP binding	GO:0042254//ribosome biogenesis
0	BMSK0003831	0.616083	7.28355	3140	5	0.212	0.4	3.56344	7.49746e-11	1.20574e-06	up	Rexo1	R exonuclease 1 homolog	Genetic Information Processing	Translation	ko03008//Ribosome biogenesis in eukaryotes	K14570	GO:0005654//nucleoplasm;GO:0016604//nuclear body	GO:0003676//nucleic acid binding;GO:0004527//exonuclease activity	-
0	BMSK0001725	0.386808	7.39648	3140	5	0.138	0.4	4.25715	1.04642e-10	1.68285e-06	up	-	-	-	-	-	-	-	-	-
0	BMSK0005727	1.11838	9.7426	3140	5	0.348	0.4	3.1229	3.15461e-10	5.07324e-06	up	dre4	FACT complex subunit spt16 isoform X2	-	-	-	-	GO:0005634//nucleus;GO:0005703//polytene chromosome puff;GO:0005730//nucleolus;GO:0005829//cytosol;GO:0035101//FACT complex	GO:0003682//chromatin binding;GO:0031491//nucleosome binding;GO:0042393//histone binding;GO:0046982//protein heterodimerization activity;GO:0047485//protein N-terminus binding	GO:0001672//regulation of chromatin assembly or disassembly;GO:0006260//DNA replication;GO:0006281//DNA repair;GO:0006368//transcription elongation from RNA polymerase II promoter;GO:0032968//positive regulation of transcription elongation from RNA polymerase II promoter;GO:0034724//DNA replication-independent nucleosome organization
0	BMSK0010998	0.8774	7.57576	3140	5	0.286	0.2	3.11008	3.47721e-10	5.59205e-06	up	Tars	threonine--tR ligase, cytoplasmic isoform X2 [Amyelois transitella]	Genetic Information Processing	Translation	ko00970//Aminoacyl-tRNA biosynthesis	K01868	GO:0005737//cytoplasm;GO:0005829//cytosol;GO:0015629//actin cytoskeleton	GO:0004829//threonine-tRNA ligase activity;GO:0005524//ATP binding	GO:0006435//threonyl-tRNA aminoacylation
0	BMSK0003449	1.2154	7.57576	3140	5	0.38	0.2	2.63996	4.74876e-10	7.63696e-06	up	PTRHD1	putative peptidyl-tR hydrolase PTRHD1	-	-	-	-	-	GO:0004045//aminoacyl-tRNA hydrolase activity	-
0	BMSK0002286	1.07488	7.57576	3140	5	0.344	0.2	2.81721	5.77135e-10	9.28148e-06	up	TIMM13	mitochondrial import inner membrane translocase subunit Tim13-like	-	-	-	-	GO:0001650//fibrillar center;GO:0005739//mitochondrion;GO:0005743//mitochondrial inner membrane;GO:0042719//mitochondrial intermembrane space protein transporter complex	GO:0008270//zinc ion binding;GO:0008565//protein transporter activity	GO:0006626//protein targeting to mitochondrion;GO:0007605//sensory perception of sound;GO:0045039//protein import into mitochondrial inner membrane;GO:0072321//chaperone-mediated protein transport
0	BMSK0006809	18.0259	61.6884	3140	5	0.987	0.8	1.77493	6.20622e-10	9.98084e-06	up	RpL44	ribosomal protein L36A	Genetic Information Processing	Translation	ko03010//Ribosome	K02929	GO:0005840//ribosome	GO:0003735//structural constituent of ribosome	GO:0006412//translation
0	BMSK0010718	1.30763	9.7426	3140	5	0.399	0.4	2.89735	1.14755e-09	1.8455e-05	up	-	uncharacterized protein LOC106130313 [Amyelois transitella]	-	-	-	-	-	-	-
0	BMSK0006615	1.12143	7.57576	3140	5	0.342	0.2	2.75605	1.57213e-09	2.5283e-05	up	snf	U1 small nuclear ribonucleoprotein A isoform X1	-	-	-	-	GO:0005634//nucleus;GO:0005681//spliceosomal complex;GO:0005685//U1 snRNP;GO:0005686//U2 snRNP;GO:0030532//small nuclear ribonucleoprotein complex;GO:0032991//macromolecular complex;GO:0071011//precatalytic spliceosome;GO:0071013//catalytic step 2 spliceosome;GO:1990904//ribonucleoprotein complex	GO:0003729//mRNA binding;GO:0008266//poly(U) RNA binding;GO:0030619//U1 snRNA binding;GO:0030620//U2 snRNA binding;GO:0035614//snRNA stem-loop binding;GO:0042802//identical protein binding;GO:0097158//pre-mRNA intronic pyrimidine-rich binding	GO:0000381//regulation of alternative mRNA splicing, via spliceosome;GO:0000398//mRNA splicing, via spliceosome;GO:0007539//primary sex determination, soma;GO:0008380//RNA splicing;GO:0019099//female germ-line sex determination;GO:0048477//oogenesis;GO:0070868//heterochromatin organization involved in chromatin silencing
0	BMSK0001319	1.29146	7.57576	3140	5	0.396	0.2	2.55239	1.89954e-09	3.05484e-05	up	mtpn	myotrophin-like [Amyelois transitella]	-	-	-	-	GO:0005634//nucleus;GO:0005737//cytoplasm	GO:0044877//macromolecular complex binding	GO:0030036//actin cytoskeleton organization;GO:2000813//negative regulation of barbed-end actin filament capping
0	BMSK0005529	31.1051	85.2833	3140	5	0.996	0.8	1.45511	2.16673e-09	3.48454e-05	up	RPL23A	ribosomal protein L23A	Genetic Information Processing	Translation	ko03010//Ribosome	K02893	GO:0005634//nucleus;GO:0022625//cytosolic large ribosomal subunit	GO:0003735//structural constituent of ribosome;GO:0019843//rRNA binding;GO:1904841//TORC2 complex binding	GO:0000027//ribosomal large subunit assembly;GO:0006412//translation
0	BMSK0010240	2.97735	13.4755	3140	5	0.647	0.4	2.17823	2.31145e-09	3.71728e-05	up	eIF3-S9	eukaryotic translation initiation factor 3 subunit B	Genetic Information Processing	Translation	ko03013//RNA transport	K03253	GO:0005852//eukaryotic translation initiation factor 3 complex;GO:0016282//eukaryotic 43S preinitiation complex;GO:0033290//eukaryotic 48S preinitiation complex	GO:0003743//translation initiation factor activity;GO:0031369//translation initiation factor binding	GO:0001732//formation of cytoplasmic translation initiation complex;GO:0006446//regulation of translational initiation
0	BMSK0001531	4.08179	15.1515	3140	5	0.754	0.2	1.89219	3.29483e-09	5.29874e-05	up	SCP2	sterol carrier protein x	Metabolism;Cellular Processes;Organismal Systems;Metabolism	Global and overview maps;Transport and catabolism;Endocrine system;Lipid metabolism	ko01100//Metabolic pathways;ko04146//Peroxisome;ko03320//PPAR signaling pathway;ko00120//Primary bile acid biosynthesis	K08764;K08764;K08764;K08764	GO:0005739//mitochondrion;GO:0005777//peroxisome	GO:0008289//lipid binding;GO:0033814//propanoyl-CoA C-acyltransferase activity	GO:0006869//lipid transport
0	BMSK0006595	1.10966	7.57576	3140	5	0.337	0.2	2.77127	5.15172e-09	8.28499e-05	up	WBP2NL	WW domain-binding protein 2 isoform X1	-	-	-	-	GO:0005634//nucleus;GO:0033011//perinuclear theca;GO:0036126//sperm flagellum	GO:0003713//transcription coactivator activity;GO:0031490//chromatin DNA binding;GO:0050699//WW domain binding	GO:0007343//egg activation;GO:0035038//female pronucleus assembly;GO:0035039//male pronucleus assembly;GO:0051321//meiotic cell cycle
0	BMSK0006706	1.79816	7.57576	3140	5	0.505	0.2	2.07487	5.70986e-09	9.1826e-05	up	tardbp	TBPH	Environmental Information Processing	Signal transduction	ko04068//FoxO signaling pathway	K10305	GO:0005654//nucleoplasm;GO:0005737//cytoplasm;GO:1990904//ribonucleoprotein complex	GO:0003690//double-stranded DNA binding;GO:0003723//RNA binding;GO:0003727//single-stranded RNA binding;GO:0003730//mRNA 3'-UTR binding	GO:0006397//mRNA processing;GO:0008380//RNA splicing;GO:0031647//regulation of protein stability;GO:0042752//regulation of circadian rhythm;GO:0048511//rhythmic process;GO:0070935//3'-UTR-mediated mRNA stabilization
0	BMSK0006509	0.663612	6.01264	3140	5	0.228	0.4	3.17959	6.22233e-09	0.000100067	up	CSN1b	G protein pathway suppressor 1	-	-	-	-	GO:0005737//cytoplasm;GO:0008180//COP9 signalosome	-	GO:0000338//protein deneddylation;GO:0007275//multicellular organism development;GO:0007281//germ cell development;GO:0036099//female germ-line stem cell population maintenance;GO:0048140//male germ-line cyst encapsulation;GO:0048142//germarium-derived cystoblast division;GO:0050821//protein stabilization
0	BMSK0011895	13.6273	26.5487	3140	5	0.96	0.2	0.962138	6.30383e-09	0.000101378	up	-	beta-tubulin	Cellular Processes;Cellular Processes;Human Diseases	Transport and catabolism;Cellular community - eukaryotes;Infectious diseases	ko04145//Phagosome;ko04540//Gap junction;ko05130//Pathogenic Escherichia coli infection	K07375;K07375;K07375	GO:0005737//cytoplasm;GO:0005874//microtubule	GO:0003924//GTPase activity;GO:0005200//structural constituent of cytoskeleton;GO:0005525//GTP binding	GO:0007017//microtubule-based process
0	BMSK0002437	2.04887	10.5256	3140	5	0.531	0.4	2.36101	6.37067e-09	0.000102453	up	Phpt1	phosphohistidine phosphatase	-	-	-	-	GO:0005829//cytosol	GO:0019855//calcium channel inhibitor activity;GO:0044325//ion channel binding;GO:0101006//protein histidine phosphatase activity	GO:0006470//protein dephosphorylation;GO:0035774//positive regulation of insulin secretion involved in cellular response to glucose stimulus;GO:0035971//peptidyl-histidine dephosphorylation;GO:0050860//negative regulation of T cell receptor signaling pathway;GO:0051350//negative regulation of lyase activity;GO:2000147//positive regulation of cell motility;GO:2000249//regulation of actin cytoskele…
0	BMSK0007326	1.49196	7.57576	3140	5	0.437	0.2	2.34418	7.04418e-09	0.000113285	up	Sart1	U4/U6.U5 tri-snRNP-associated protein 1 isoform X1	Genetic Information Processing	Transcription	ko03040//Spliceosome	K11984	GO:0005634//nucleus;GO:0005654//nucleoplasm;GO:0005794//Golgi apparatus;GO:0015030//Cajal body;GO:0016607//nuclear speck;GO:0046540//U4/U6 x U5 tri-snRNP complex;GO:0071005//U2-type precatalytic spliceosome;GO:0071013//catalytic step 2 spliceosome	-	GO:0000398//mRNA splicing, via spliceosome;GO:0000481//maturation of 5S rRNA;GO:0045292//mRNA cis splicing, via spliceosome;GO:0045585//positive regulation of cytotoxic T cell differentiation
0	BMSK0000863	6.35756	15.1515	3140	5	0.872	0.2	1.25292	1.07835e-08	0.00017342	up	Nacalpha	nascent polypeptide associated complex protein alpha subunit	Organismal Systems	Endocrine system	ko04928//Parathyroid hormone synthesis, secretion and action	K03626	GO:0005854//nascent polypeptide-associated complex	-	GO:0007275//multicellular organism development;GO:0015031//protein transport
0	BMSK0014687	29.4419	82.517	3140	5	0.998	1	1.48682	1.16985e-08	0.000188135	up	pex6	ribosomal protein S25	Cellular Processes	Transport and catabolism	ko04146//Peroxisome	K13339	GO:0005777//peroxisome;GO:0005778//peroxisomal membrane;GO:0005829//cytosol	GO:0005524//ATP binding;GO:0016887//ATPase activity	GO:0006625//protein targeting to peroxisome;GO:0007031//peroxisome organization;GO:0016558//protein import into peroxisome matrix
0	BMSK0001324	1.72545	7.57576	3140	5	0.476	0.2	2.13442	1.31144e-08	0.000210906	up	Cacybp	calcyclin-binding protein [Amyelois transitella]	Environmental Information Processing	Signal transduction	ko04310//Wnt signaling pathway	K04507	GO:0005634//nucleus;GO:0005641//nuclear envelope lumen;GO:0005654//nucleoplasm;GO:0005737//cytoplasm;GO:0005829//cytosol;GO:0019005//SCF ubiquitin ligase complex;GO:0030877//beta-catenin destruction complex;GO:0043005//neuron projection;GO:0044297//cell body	GO:0015631//tubulin binding;GO:0019904//protein domain specific binding;GO:0031625//ubiquitin protein ligase binding;GO:0042803//protein homodimerization activity;GO:0044548//S100 protein binding	GO:0007507//heart development;GO:0007568//aging;GO:0045740//positive regulation of DNA replication;GO:0055007//cardiac muscle cell differentiation;GO:0060416//response to growth hormone;GO:0060548//negative regulation of cell death;GO:0071277//cellular response to calcium ion;GO:1990830//cellular response to leukemia inhibitory factor
0	BMSK0014516	1.53715	7.57576	3140	5	0.442	0.2	2.30114	1.51258e-08	0.000243253	up	ATPsynCf6	ABF51465.1 mitochondrial ATP synthase coupling factor 6	Metabolism;Organismal Systems;Human Diseases;Human Diseases;Human Diseases;Metabolism	Global and overview maps;Environmental adaptation;Neurodegenerative diseases;Neurodegenerative diseases;Neurodegenerative diseases;Energy metabolism	ko01100//Metabolic pathways;ko04714//Thermogenesis;ko05016//Huntington disease;ko05010//Alzheimer disease;ko05012//Parkinson disease;ko00190//Oxidative phosphorylation	K02131;K02131;K02131;K02131;K02131;K02131	GO:0000276//mitochondrial proton-transporting ATP synthase complex, coupling factor F(o);GO:0005739//mitochondrion;GO:0005753//mitochondrial proton-transporting ATP synthase complex;GO:0005756//mitochondrial proton-transporting ATP synthase, central stalk	GO:0015078//hydrogen ion transmembrane transporter activity	GO:0015986//ATP synthesis coupled proton transport;GO:1902600//hydrogen ion transmembrane transport
0	BMSK0001734	1.24431	7.57576	3140	5	0.368	0.2	2.60605	1.52314e-08	0.000244952	up	-	la protein homolog [Papilio polytes]	Human Diseases	Immune diseases	ko05322//Systemic lupus erythematosus	K11090	GO:0005634//nucleus;GO:0005737//cytoplasm;GO:1990904//ribonucleoprotein complex	GO:0003677//DNA binding;GO:0003723//RNA binding	GO:0006396//RNA processing
0	BMSK0013064	0.00331067	7.89057	3140	5	0.002	0.6	11.2188	1.95583e-08	0.000314537	up	-	XP 004925459.1 uncharacterized protein LOC101738880 isoform X1	-	-	-	-	-	-	-
0	BMSK0001762	1.38479	9.18836	3140	5	0.382	0.2	2.73014	2.28096e-08	0.000366824	up	CTDSP1	carboxy-terminal domain R polymerase II polypeptide A small phosphatase 1 [Amyelois transitella]	-	-	-	-	GO:0005634//nucleus;GO:0005654//nucleoplasm;GO:0070062//extracellular exosome	GO:0004721//phosphoprotein phosphatase activity;GO:0008420//CTD phosphatase activity;GO:0046872//metal ion binding	GO:0001933//negative regulation of protein phosphorylation;GO:0006357//regulation of transcription from RNA polymerase II promoter;GO:0006470//protein dephosphorylation;GO:0045665//negative regulation of neuron differentiation;GO:2000134//negative regulation of G1/S transition of mitotic cell cycle
0	BMSK0003692	5.29207	30.7938	3140	5	0.814	0.6	2.54074	2.34463e-08	0.000377064	up	-	hematological and neurological expressed 1 protein	-	-	-	-	-	-	-
0	BMSK0003862	36.5789	79.5823	3140	5	0.999	0.8	1.12144	2.53358e-08	0.000407451	up	RPS27	ribosomal protein S27	Genetic Information Processing	Translation	ko03010//Ribosome	K02978	GO:0005634//nucleus;GO:0014069//postsynaptic density;GO:0022627//cytosolic small ribosomal subunit	GO:0003735//structural constituent of ribosome;GO:0046872//metal ion binding	GO:0000028//ribosomal small subunit assembly;GO:0006364//rRNA processing;GO:0006412//translation
0	BMSK0001399	11.3591	29.3692	3140	5	0.964	0.6	1.37046	2.71366e-08	0.000436412	up	RpL37A	ribosomal protein L37A	Genetic Information Processing	Translation	ko03010//Ribosome	K02921	GO:0022625//cytosolic large ribosomal subunit	GO:0003735//structural constituent of ribosome;GO:0046872//metal ion binding	GO:0002181//cytoplasmic translation
0	BMSK0008529	1.81247	7.57576	3140	5	0.495	0.2	2.06343	2.7929e-08	0.000449154	up	NDUFB8	DH dehydrogenase [ubiquinone] 1 beta subcomplex subunit 8, mitochondrial	Metabolism;Organismal Systems;Human Diseases;Human Diseases;Human Diseases;Metabolism;Human Diseases;Organismal Systems	Global and overview maps;Environmental adaptation;Neurodegenerative diseases;Neurodegenerative diseases;Neurodegenerative diseases;Energy metabolism;Endocrine and metabolic diseases;Nervous system	ko01100//Metabolic pathways;ko04714//Thermogenesis;ko05016//Huntington disease;ko05010//Alzheimer disease;ko05012//Parkinson disease;ko00190//Oxidative phosphorylation;ko04932//Non-alcoholic fatty liver disease (NAFLD);ko04723//Retrograde endocannabinoid signaling	K03964;K03964;K03964;K03964;K03964;K03964;K03964;K03964	GO:0005747//mitochondrial respiratory chain complex I;GO:0016021//integral component of membrane	GO:0008137//NADH dehydrogenase (ubiquinone) activity	GO:0006120//mitochondrial electron transport, NADH to ubiquinone;GO:0032981//mitochondrial respiratory chain complex I assembly
0	BMSK0001031	11.2708	38.4582	3140	5	0.955	0.8	1.7707	3.02412e-08	0.00048634	up	RpS21	RS21 BOMMO RecName: Full=40S ribosomal protein S21	Genetic Information Processing	Translation	ko03010//Ribosome	K02971	GO:0005791//rough endoplasmic reticulum;GO:0005829//cytosol;GO:0005840//ribosome	GO:0003735//structural constituent of ribosome	GO:0006412//translation
0	BMSK0015353	1.45483	8.06655	3140	5	0.425	0.4	2.47111	3.54798e-08	0.000570586	up	cat2	Acetyl-CoA hydrolase/transferase C-terminal domain	-	-	-	-	-	GO:0016740//transferase activity	GO:0006084//acetyl-CoA metabolic process
0	BMSK0013426	3.4825	14.3944	3140	5	0.708	0.6	2.04732	4.05385e-08	0.00065194	up	RpL38	60S ribosomal protein L38	Genetic Information Processing	Translation	ko03010//Ribosome	K02923	GO:0005840//ribosome	GO:0003735//structural constituent of ribosome	GO:0006412//translation
0	BMSK0006276	26.2303	67.9961	3140	5	0.997	0.8	1.37422	4.91579e-08	0.000790558	up	RpS28	RS28 BOMMO RecName: Full=40S ribosomal protein S28	Genetic Information Processing	Translation	ko03010//Ribosome	K02979	GO:0022627//cytosolic small ribosomal subunit;GO:0042788//polysomal ribosome;GO:0098556//cytoplasmic side of rough endoplasmic reticulum membrane	GO:0003735//structural constituent of ribosome	GO:0002181//cytoplasmic translation
0	BMSK0001811	1.29303	8.29242	3140	5	0.379	0.4	2.68104	6.52647e-08	0.00104959	up	TMEM18	transmembrane protein 18 [Papilio polytes]	-	-	-	-	GO:0005737//cytoplasm;GO:0016021//integral component of membrane;GO:0031965//nuclear membrane	GO:0003677//DNA binding	GO:0016477//cell migration
0	BMSK0013294	1.96442	7.57576	3140	5	0.513	0.2	1.94728	9.03915e-08	0.00145368	up	HIGD2A	XP 004932659.1 HIG1 domain family member 2A, mitochondrial	-	-	-	-	GO:0005743//mitochondrial inner membrane;GO:0016021//integral component of membrane;GO:0070469//respiratory chain	-	GO:0043066//negative regulation of apoptotic process;GO:0055114//oxidation-reduction process
0	BMSK0011393	0.00642768	6.1686	3140	5	0.003	0.6	9.90643	9.65056e-08	0.001552	up	Jon99Cii	serine protease precursor	-	-	-	-	-	GO:0004252//serine-type endopeptidase activity	GO:0006508//proteolysis
0	BMSK0002290	87.9653	182.982	3140	5	1	0.8	1.0567	1.00197e-07	0.00161137	up	Tctp	translationally-controlled tumor protein homolog isoform X2	-	-	-	-	GO:0005737//cytoplasm	-	-
0	BMSK0008300	36.3725	94.2465	3140	5	0.999	1	1.37359	1.00832e-07	0.00162157	up	RpS3	ribosomal protein S3	Genetic Information Processing	Translation	ko03010//Ribosome	K02985	GO:0015935//small ribosomal subunit	GO:0003723//RNA binding;GO:0003735//structural constituent of ribosome	GO:0006412//translation
0	BMSK0011480	1.0279	6.12557	3140	5	0.32	0.2	2.57515	1.1138e-07	0.00179121	up	Pard6b	partitioning defective protein 6 [Papilio polytes]	Human Diseases;Cellular Processes;Environmental Information Processing;Cellular Processes;Organismal Systems;Environmental Information Processing;Environmental Information Processing	Infectious diseases;Transport and catabolism;Signal transduction;Cellular community - eukaryotes;Development;Signal transduction;Signal transduction	ko05165//Human papillomavirus infection;ko04144//Endocytosis;ko04015//Rap1 signaling pathway;ko04530//Tight junction;ko04360//Axon guidance;ko04390//Hippo signaling pathway;ko04391//Hippo signaling pathway -fly	K06093;K06093;K06093;K06093;K06093;K06093;K06093	GO:0005634//nucleus;GO:0005829//cytosol;GO:0005886//plasma membrane;GO:0005923//bicellular tight junction;GO:0005938//cell cortex;GO:0016324//apical plasma membrane;GO:0032991//macromolecular complex;GO:0045177//apical part of cell	GO:0005080//protein kinase C binding;GO:0017048//Rho GTPase binding	GO:0007043//cell-cell junction assembly;GO:0007098//centrosome cycle;GO:0007163//establishment or maintenance of cell polarity;GO:0051301//cell division;GO:0060341//regulation of cellular localization;GO:0065003//macromolecular complex assembly
0	BMSK0015784	2.38761	7.57576	3140	5	0.596	0.2	1.66582	1.3702e-07	0.00220356	up	ATPsyngamma	ABF51367.1 H+ transporting ATP synthase gamma subunit	Metabolism;Organismal Systems;Human Diseases;Human Diseases;Human Diseases;Metabolism	Global and overview maps;Environmental adaptation;Neurodegenerative diseases;Neurodegenerative diseases;Neurodegenerative diseases;Energy metabolism	ko01100//Metabolic pathways;ko04714//Thermogenesis;ko05016//Huntington disease;ko05010//Alzheimer disease;ko05012//Parkinson disease;ko00190//Oxidative phosphorylation	K02136;K02136;K02136;K02136;K02136;K02136	GO:0000275//mitochondrial proton-transporting ATP synthase complex, catalytic core F(1);GO:0005739//mitochondrion	GO:0046933//proton-transporting ATP synthase activity, rotational mechanism	GO:0006754//ATP biosynthetic process;GO:0015986//ATP synthesis coupled proton transport;GO:1902600//hydrogen ion transmembrane transport
0	BMSK0008190	49.0101	124.691	3140	5	1	1	1.34721	1.40166e-07	0.00225415	up	RpS16	ribosomal protein S16	Genetic Information Processing	Translation	ko03010//Ribosome	K02960	GO:0005840//ribosome	GO:0003735//structural constituent of ribosome	GO:0006412//translation
0	BMSK0008918	24.5647	59.8935	3140	5	0.995	0.8	1.28581	1.78696e-07	0.00287379	up	RpL10A	ribosomal protein L10A	Genetic Information Processing	Translation	ko03010//Ribosome	K02865	GO:0015934//large ribosomal subunit	GO:0003723//RNA binding;GO:0003735//structural constituent of ribosome	GO:0006412//translation
0	BMSK0009992	0.220154	15.0153	3140	5	0.052	0.6	6.09177	1.79159e-07	0.00288124	up	-	-	-	-	-	-	-	-	-
0	BMSK0001139	21.4896	63.5627	3140	5	0.993	1	1.56454	2.48053e-07	0.00398919	up	RpL34	ibosomal protein L34 isoform X1	Genetic Information Processing	Translation	ko03010//Ribosome	K02915	GO:0005840//ribosome	GO:0003735//structural constituent of ribosome	GO:0006412//translation
0	BMSK0000071	0.512425	6.1686	3140	5	0.176	0.6	3.58953	2.58118e-07	0.00415106	up	-	ADP-ribosylation factor GTPase-activating protein 1	Cellular Processes	Transport and catabolism	ko04144//Endocytosis	K12492	-	-	-
0	BMSK0001949	23.0128	73.239	3140	5	0.989	1	1.67018	2.63524e-07	0.00423799	up	Rpl35	ribosomal protein L35	Genetic Information Processing	Translation	ko03010//Ribosome	K02918	GO:0022625//cytosolic large ribosomal subunit	GO:0003729//mRNA binding;GO:0003735//structural constituent of ribosome;GO:0043021//ribonucleoprotein complex binding	GO:0000463//maturation of LSU-rRNA from tricistronic rRNA transcript (SSU-rRNA, 5.8S rRNA, LSU-rRNA);GO:0006412//translation
0	BMSK0006638	2.78177	7.57576	3140	5	0.638	0.2	1.44539	3.06768e-07	0.00493345	up	SmF	small nuclear ribonucleoprotein protein F	Genetic Information Processing	Transcription	ko03040//Spliceosome	K11098	GO:0005681//spliceosomal complex;GO:0005685//U1 snRNP;GO:0005732//small nucleolar ribonucleoprotein complex;GO:0030532//small nuclear ribonucleoprotein complex;GO:0071011//precatalytic spliceosome;GO:0071013//catalytic step 2 spliceosome	GO:0003723//RNA binding	GO:0000387//spliceosomal snRNP assembly;GO:0000398//mRNA splicing, via spliceosome
0	BMSK0013760	8.35708	32.2932	3140	5	0.933	0.8	1.95016	3.15036e-07	0.00506641	up	-	-	-	-	-	-	-	-	-
0	BMSK0014093	45.389	138.707	3140	5	0.999	1	1.61163	3.26479e-07	0.00525044	up	RpL32	ribosomal protein L32	Genetic Information Processing	Translation	ko03010//Ribosome	K02912	GO:0005840//ribosome	GO:0003735//structural constituent of ribosome	GO:0006412//translation
0	BMSK0010672	0.0460168	5.22963	3140	5	0.016	0.4	6.8284	3.68389e-07	0.00592444	up	B4galt6	XP 021205073.1 beta-1,4-N-acetylgalactosaminyltransferase bre-4-like isoform X2	Metabolism;Metabolism;Metabolism;Metabolism;Metabolism;Metabolism;Metabolism	Global and overview maps;Carbohydrate metabolism;Glycan biosynthesis and metabolism;Glycan biosynthesis and metabolism;Glycan biosynthesis and metabolism;Glycan biosynthesis and metabolism;Glycan biosynthesis and metabolism	ko01100//Metabolic pathways;ko00052//Galactose metabolism;ko00510//N-Glycan biosynthesis;ko00514//Other types of O-glycan biosynthesis;ko00515//Mannose type O-glycan biosyntheis;ko00601//Glycosphingolipid biosynthesis - lacto and neolacto series;ko00533//Glycosaminoglycan biosynthesis - keratan sulfate	K07967;K07967;K07967;K07967;K07967;K07967;K07967	GO:0016021//integral component of membrane;GO:0032580//Golgi cisterna membrane	GO:0008489//UDP-galactose:glucosylceramide beta-1,4-galactosyltransferase activity;GO:0046872//metal ion binding	GO:0005975//carbohydrate metabolic process;GO:0006486//protein glycosylation;GO:0006688//glycosphingolipid biosynthetic process;GO:0010706//ganglioside biosynthetic process via lactosylceramide;GO:0021955//central nervous system neuron axonogenesis;GO:0022010//central nervous system myelination;GO:0042551//neuron maturation
0	BMSK0010566	0.539699	4.94072	3140	5	0.184	0.4	3.1945	4.38838e-07	0.00705739	up	rcor2	REST corepressor isoform X3 [Papilio xuthus]	-	-	-	-	GO:0005634//nucleus;GO:0005667//transcription factor complex;GO:0017053//transcriptional repressor complex	GO:0003700//transcription factor activity, sequence-specific DNA binding;GO:0003714//transcription corepressor activity;GO:0008134//transcription factor binding;GO:0044212//transcription regulatory region DNA binding	-
0	BMSK0012034	37.3398	87.3809	3140	5	0.998	0.8	1.2266	5.97423e-07	0.00960775	up	RpL17	60S ribosomal protein L17	Genetic Information Processing	Translation	ko03010//Ribosome	K02880	GO:0015934//large ribosomal subunit	GO:0003735//structural constituent of ribosome	GO:0006412//translation
0	BMSK0005808	82.5291	178.655	3140	5	1	1	1.1142	6.17911e-07	0.00993724	up	RpL10	ribosomal protein L10	Genetic Information Processing	Translation	ko03010//Ribosome	K02866	GO:0005840//ribosome	GO:0003735//structural constituent of ribosome	GO:0006412//translation
											65
Cluster	GeneID	CK	BmNPV	cells.1	cells.2	pct.1	pct.2	log2FC	p_value	p_val_adjust	significance	Symbol	Description	KEGG_A_class	KEGG_B_class	Pathway	K_ID	GO Component	GO Function	GO Process
0	BMSK0003118	246.55	38.2151	3140	5	1	0.4	-2.68966	7.69311e-21	1.23721e-16	down	ost-1	secreted protein acidic and rich in cysteine	-	-	-	-	GO:0005604//basement membrane;GO:0005615//extracellular space	GO:0005509//calcium ion binding;GO:0005518//collagen binding;GO:0050840//extracellular matrix binding	GO:0007275//multicellular organism development
0	BMSK0003260	123.918	6.83867	3140	5	0.999	0.4	-4.17953	9.57067e-20	1.53915e-15	down	NLGN1	carboxylesterase clade H, member 1 precursor	-	-	-	-	GO:0005794//Golgi apparatus;GO:0005886//plasma membrane;GO:0005887//integral component of plasma membrane;GO:0009897//external side of plasma membrane;GO:0009986//cell surface;GO:0014069//postsynaptic density;GO:0017146//NMDA selective glutamate receptor complex;GO:0030054//cell junction;GO:0030425//dendrite;GO:0032433//filopodium tip;GO:0043197//dendritic spine;GO:0043198//dendritic shaft;GO:004…	GO:0001540//beta-amyloid binding;GO:0030165//PDZ domain binding;GO:0038023//signaling receptor activity;GO:0042043//neurexin family protein binding;GO:0046983//protein dimerization activity;GO:0050839//cell adhesion molecule binding;GO:0097110//scaffold protein binding	GO:0002087//regulation of respiratory gaseous exchange by neurological system process;GO:0006605//protein targeting;GO:0007157//heterophilic cell-cell adhesion via plasma membrane cell adhesion molecules;GO:0007158//neuron cell-cell adhesion;GO:0007399//nervous system development;GO:0007416//synapse assembly;GO:0010841//positive regulation of circadian sleep/wake cycle, wakefulness;GO:0016080//sy…
0	BMSK0001652	47.6216	6.1686	3140	5	1	0.6	-2.9486	4.24491e-16	6.82666e-12	down	LAMP1	sodium/potassium-transporting ATPase subunit beta-2	Cellular Processes;Cellular Processes;Cellular Processes;Human Diseases	Transport and catabolism;Transport and catabolism;Transport and catabolism;Infectious diseases	ko04142//Lysosome;ko04140//Autophagy - animal;ko04145//Phagosome;ko05152//Tuberculosis	K06528;K06528;K06528;K06528	GO:0005765//lysosomal membrane;GO:0005771//multivesicular body;GO:0005829//cytosol;GO:0005901//caveola;GO:0008021//synaptic vesicle;GO:0009897//external side of plasma membrane;GO:0010008//endosome membrane;GO:0016021//integral component of membrane;GO:0042383//sarcolemma;GO:0042470//melanosome;GO:0044194//cytolytic granule;GO:0044754//autolysosome;GO:0045121//membrane raft;GO:0048471//perinuclea…	GO:0019899//enzyme binding;GO:0019904//protein domain specific binding	GO:0008626//granzyme-mediated apoptotic signaling pathway;GO:0043323//positive regulation of natural killer cell degranulation;GO:0050821//protein stabilization;GO:0072594//establishment of protein localization to organelle;GO:0090160//Golgi to lysosome transport;GO:1902513//regulation of organelle transport along microtubule
0	BMSK0001981	120.445	9.00552	3140	5	1	0.6	-3.74143	2.17502e-15	3.49787e-11	down	-	collagen alpha-1(IV) chain [Papilio xuthus]	Human Diseases;Human Diseases;Environmental Information Processing;Cellular Processes;Organismal Systems;Organismal Systems;Human Diseases;Human Diseases;Human Diseases;Environmental Information Processing	Cancers;Infectious diseases;Signal transduction;Cellular community - eukaryotes;Digestive system;Endocrine system;Cancers;Endocrine and metabolic diseases;Infectious diseases;Signaling molecules and interaction	ko05200//Pathways in cancer;ko05165//Human papillomavirus infection;ko04151//PI3K-Akt signaling pathway;ko04510//Focal adhesion;ko04974//Protein digestion and absorption;ko04926//Relaxin signaling pathway;ko05222//Small cell lung cancer;ko04933//AGE-RAGE signaling pathway in diabetic complications;ko05146//Amoebiasis;ko04512//ECM-receptor interaction	K06237;K06237;K06237;K06237;K06237;K06237;K06237;K06237;K06237;K06237	GO:0005581//collagen trimer;GO:0005604//basement membrane	GO:0005201//extracellular matrix structural constituent	-
0	BMSK0014898	62.1851	0.938967	3140	5	0.999	0.2	-6.04935	1.30235e-14	2.09443e-10	down	Ppn	Kunitz/Bovine pancreatic trypsin inhibitor domain	-	-	-	-	GO:0005604//basement membrane	GO:0004867//serine-type endopeptidase inhibitor activity;GO:0005201//extracellular matrix structural constituent;GO:0008233//peptidase activity	GO:0007275//multicellular organism development;GO:0030198//extracellular matrix organization
0	BMSK0001980	97.9282	16.6272	3140	5	1	0.4	-2.55818	7.48039e-12	1.203e-07	down	COL4A5	collagen alpha-2(IV) chain	Human Diseases;Human Diseases;Environmental Information Processing;Cellular Processes;Organismal Systems;Organismal Systems;Human Diseases;Human Diseases;Human Diseases;Environmental Information Processing	Cancers;Infectious diseases;Signal transduction;Cellular community - eukaryotes;Digestive system;Endocrine system;Cancers;Endocrine and metabolic diseases;Infectious diseases;Signaling molecules and interaction	ko05200//Pathways in cancer;ko05165//Human papillomavirus infection;ko04151//PI3K-Akt signaling pathway;ko04510//Focal adhesion;ko04974//Protein digestion and absorption;ko04926//Relaxin signaling pathway;ko05222//Small cell lung cancer;ko04933//AGE-RAGE signaling pathway in diabetic complications;ko05146//Amoebiasis;ko04512//ECM-receptor interaction	K06237;K06237;K06237;K06237;K06237;K06237;K06237;K06237;K06237;K06237	GO:0005576//extracellular region;GO:0005587//collagen type IV trimer;GO:0005615//extracellular space;GO:0005788//endoplasmic reticulum lumen;GO:0031012//extracellular matrix;GO:0031594//neuromuscular junction	GO:0005201//extracellular matrix structural constituent;GO:0030020//extracellular matrix structural constituent conferring tensile strength	GO:0007528//neuromuscular junction development;GO:0030198//extracellular matrix organization;GO:0038063//collagen-activated tyrosine kinase receptor signaling pathway
0	BMSK0015667	35.741	2.16685	3140	5	0.998	0.2	-4.04391	1.22426e-10	1.96886e-06	down	Hsp83	heat shock protein 83	Human Diseases;Genetic Information Processing;Environmental Information Processing;Organismal Systems;Human Diseases;Organismal Systems;Human Diseases;Cellular Processes;Organismal Systems;Organismal Systems;Organismal Systems;Organismal Systems	Cancers;Folding, sorting and degradation;Signal transduction;Endocrine system;Cardiovascular diseases;Endocrine system;Cancers;Cell growth and death;Immune system;Immune system;Immune system;Immune system	ko05200//Pathways in cancer;ko04141//Protein processing in endoplasmic reticulum;ko04151//PI3K-Akt signaling pathway;ko04915//Estrogen signaling pathway;ko05418//Fluid shear stress and atherosclerosis;ko04914//Progesterone-mediated oocyte maturation;ko05215//Prostate cancer;ko04217//Necroptosis;ko04621//NOD-like receptor signaling pathway;ko04612//Antigen processing and presentation;ko04657//IL-1…	K04079;K04079;K04079;K04079;K04079;K04079;K04079;K04079;K04079;K04079;K04079;K04079	GO:0005737//cytoplasm	GO:0005524//ATP binding;GO:0051082//unfolded protein binding	GO:0006457//protein folding
0	BMSK0012509	26.1393	0.938967	3140	5	0.991	0.2	-4.799	3.38956e-09	5.45108e-05	down	crt	calreticulin	Genetic Information Processing;Human Diseases;Human Diseases;Cellular Processes;Human Diseases;Organismal Systems	Folding, sorting and degradation;Infectious diseases;Infectious diseases;Transport and catabolism;Infectious diseases;Immune system	ko04141//Protein processing in endoplasmic reticulum;ko05166//HTLV-I infection;ko05163//Human cytomegalovirus infection;ko04145//Phagosome;ko05142//Chagas disease (American trypanosomiasis);ko04612//Antigen processing and presentation	K08057;K08057;K08057;K08057;K08057;K08057	GO:0005788//endoplasmic reticulum lumen	GO:0005509//calcium ion binding;GO:0030246//carbohydrate binding;GO:0051082//unfolded protein binding	GO:0006457//protein folding
0	BMSK0003908	142.971	34.9994	3140	5	1	0.4	-2.03032	7.57937e-09	0.000121891	down	-	hemocyte protease-1	-	-	-	-	GO:0005576//extracellular region;GO:0030133//transport vesicle	GO:0004252//serine-type endopeptidase activity;GO:0046872//metal ion binding	GO:0042381//hemolymph coagulation
0	BMSK0001288	29.2752	6.83867	3140	5	0.998	0.4	-2.09789	4.46226e-08	0.000717621	down	-	uncharacterized protein LOC101743420	-	-	-	-	-	-	-
0	BMSK0013039	41.2346	8.87257	3140	5	0.998	0.6	-2.21643	5.15807e-08	0.000829522	down	PCM3	EF hand	Human Diseases;Human Diseases;Environmental Information Processing;Environmental Information Processing;Organismal Systems;Environmental Information Processing;Human Diseases;Environmental Information Processing;Organismal Systems;Environmental Information Processing;Human Diseases;Cellular Processes;Organismal Systems;Cellular Processes;Organismal Systems;Environmental Information Processing;Org…	Cancers;Neurodegenerative diseases;Signal transduction;Signal transduction;Endocrine system;Signal transduction;Substance dependence;Signal transduction;Circulatory system;Signal transduction;Infectious diseases;Cell growth and death;Endocrine system;Cell growth and death;Circulatory system;Signal transduction;Nervous system;Endocrine system;Endocrine system;Endocrine system;Cardiovascular diseas…	ko05200//Pathways in cancer;ko05010//Alzheimer disease;ko04024//cAMP signaling pathway;ko04014//Ras signaling pathway;ko04910//Insulin signaling pathway;ko04015//Rap1 signaling pathway;ko05034//Alcoholism;ko04020//Calcium signaling pathway;ko04270//Vascular smooth muscle contraction;ko04022//cGMP - PKG signaling pathway;ko05163//Human cytomegalovirus infection;ko04114//Oocyte meiosis;ko04921//Oxy…	K02183;K02183;K02183;K02183;K02183;K02183;K02183;K02183;K02183;K02183;K02183;K02183;K02183;K02183;K02183;K02183;K02183;K02183;K02183;K02183;K02183;K02183;K02183;K02183;K02183;K02183;K02183;K02183;K02183;K02183;K02183;K02183;K02183;K02183;K02183;K02183;K02183;K02183;K02183;K02183	-	GO:0005509//calcium ion binding	-
0	BMSK0015909	17.1875	11.7994	3140	5	0.979	0.2	-0.542647	1.02246e-07	0.00164432	down	-	hypothetical protein RR48 06795 [Papilio machaon]	-	-	-	-	-	-	-
0	BMSK0004544	449.436	245.846	3140	5	1	1	-0.870359	4.23702e-07	0.00681397	down	-	putative cuticle protein CPH43	-	-	-	-	-	-	-
											13

## Sheet: 1
Cluster	GeneID	CK	BmNPV	cells.1	cells.2	pct.1	pct.2	log2FC	p_value	p_val_adjust	significance	Symbol	Description	KEGG_A_class	KEGG_B_class	Pathway	K_ID	GO Component	GO Function	GO Process
1	BMSK0006276	20.8532	94.3063	12	2303	1	0.906	2.17709	1.77859e-22	2.86034e-18	up	RpS28	RS28 BOMMO RecName: Full=40S ribosomal protein S28	Genetic Information Processing	Translation	ko03010//Ribosome	K02979	GO:0022627//cytosolic small ribosomal subunit;GO:0042788//polysomal ribosome;GO:0098556//cytoplasmic side of rough endoplasmic reticulum membrane	GO:0003735//structural constituent of ribosome	GO:0002181//cytoplasmic translation
1	BMSK0005529	21.6561	86.207	12	2303	1	0.889	1.99303	6.25066e-21	1.00523e-16	up	RPL23A	ribosomal protein L23A	Genetic Information Processing	Translation	ko03010//Ribosome	K02893	GO:0005634//nucleus;GO:0022625//cytosolic large ribosomal subunit	GO:0003735//structural constituent of ribosome;GO:0019843//rRNA binding;GO:1904841//TORC2 complex binding	GO:0000027//ribosomal large subunit assembly;GO:0006412//translation
1	BMSK0013462	21.8608	95.3922	12	2303	1	0.908	2.12553	8.16417e-20	1.31296e-15	up	RpS13	ribosomal protein S13	Genetic Information Processing	Translation	ko03010//Ribosome	K02953	GO:0005840//ribosome	GO:0003735//structural constituent of ribosome	GO:0006412//translation
1	BMSK0009038	9.6869	60.6131	12	2303	0.75	0.833	2.64552	9.24013e-17	1.486e-12	up	rpl35a	ribosomal protein L35A	Genetic Information Processing	Translation	ko03010//Ribosome	K02917	GO:0005840//ribosome	GO:0000049//tRNA binding;GO:0003735//structural constituent of ribosome	GO:0006412//translation
1	BMSK0012298	25.3227	91.5601	12	2303	1	0.903	1.85429	1.85748e-16	2.98719e-12	up	RpL36	ribosomal protein L36	Genetic Information Processing	Translation	ko03010//Ribosome	K02920	GO:0005730//nucleolus;GO:0005737//cytoplasm;GO:0022625//cytosolic large ribosomal subunit;GO:0022626//cytosolic ribosome	GO:0003735//structural constituent of ribosome	GO:0002181//cytoplasmic translation
1	BMSK0011589	25.0814	86.4276	12	2303	1	0.893	1.78488	3.79141e-15	6.09735e-11	up	RpS12	XP 012550525.1 ribosomal protein S12 isoform X1	Genetic Information Processing	Translation	ko03010//Ribosome	K02951	GO:0022627//cytosolic small ribosomal subunit	GO:0003735//structural constituent of ribosome	GO:0002181//cytoplasmic translation
1	BMSK0010322	29.1898	107.731	12	2303	1	0.921	1.8839	5.68935e-15	9.14961e-11	up	RpS24	AAS91555.1 ribosomal protein S24	Genetic Information Processing	Translation	ko03010//Ribosome	K02974	GO:0005840//ribosome	GO:0003735//structural constituent of ribosome	GO:0006412//translation
1	BMSK0007017	22.1967	79.6606	12	2303	1	0.858	1.84352	5.76305e-15	9.26814e-11	up	RpL9	ribosomal protein L9 isoform X1	Genetic Information Processing	Translation	ko03010//Ribosome	K02940	GO:0005840//ribosome	GO:0003735//structural constituent of ribosome;GO:0019843//rRNA binding	GO:0006412//translation
1	BMSK0011898	37.4245	190.526	12	2303	1	0.953	2.34793	2.20173e-14	3.54082e-10	up	RpS20	ribosomal protein S20	Genetic Information Processing	Translation	ko03010//Ribosome	K02969	GO:0015935//small ribosomal subunit;GO:0022627//cytosolic small ribosomal subunit	GO:0003723//RNA binding;GO:0003735//structural constituent of ribosome	GO:0002181//cytoplasmic translation;GO:0006412//translation
1	BMSK0007539	21.5979	72.0712	12	2303	0.917	0.865	1.73853	7.58239e-14	1.2194e-09	up	RpS10	ribosomal protein S10 isoform X1	Genetic Information Processing	Translation	ko03010//Ribosome	K02947	GO:0005840//ribosome	-	-
1	BMSK0005571	33.9382	123.223	12	2303	1	0.938	1.86029	2.22276e-13	3.57464e-09	up	RpS15Aa	ribosomal protein S15A	Genetic Information Processing	Translation	ko03010//Ribosome	K02957	GO:0022626//cytosolic ribosome;GO:0022627//cytosolic small ribosomal subunit	GO:0003735//structural constituent of ribosome	GO:0002181//cytoplasmic translation
1	BMSK0012034	26.6517	98.8571	12	2303	0.917	0.907	1.89112	3.43487e-13	5.52395e-09	up	RpL17	60S ribosomal protein L17	Genetic Information Processing	Translation	ko03010//Ribosome	K02880	GO:0015934//large ribosomal subunit	GO:0003735//structural constituent of ribosome	GO:0006412//translation
1	BMSK0001949	18.5105	74.5884	12	2303	0.833	0.868	2.01061	4.27482e-13	6.87476e-09	up	Rpl35	ribosomal protein L35	Genetic Information Processing	Translation	ko03010//Ribosome	K02918	GO:0022625//cytosolic large ribosomal subunit	GO:0003729//mRNA binding;GO:0003735//structural constituent of ribosome;GO:0043021//ribonucleoprotein complex binding	GO:0000463//maturation of LSU-rRNA from tricistronic rRNA transcript (SSU-rRNA, 5.8S rRNA, LSU-rRNA);GO:0006412//translation
1	BMSK0001399	5.18136	36.7975	12	2303	0.583	0.73	2.8282	9.6035e-13	1.54443e-08	up	RpL37A	ribosomal protein L37A	Genetic Information Processing	Translation	ko03010//Ribosome	K02921	GO:0022625//cytosolic large ribosomal subunit	GO:0003735//structural constituent of ribosome;GO:0046872//metal ion binding	GO:0002181//cytoplasmic translation
1	BMSK0008606	38.453	131.571	12	2303	1	0.942	1.77468	1.04965e-12	1.68804e-08	up	RPS5	ribosomal protein S5	Genetic Information Processing	Translation	ko03010//Ribosome	K02989	GO:0022627//cytosolic small ribosomal subunit	GO:0003729//mRNA binding;GO:0003735//structural constituent of ribosome;GO:0019843//rRNA binding	GO:0000028//ribosomal small subunit assembly;GO:0006412//translation;GO:0006450//regulation of translational fidelity
1	BMSK0009129	30.829	103.316	12	2303	1	0.899	1.74471	1.7028e-12	2.73845e-08	up	rpl6	ribosomal protein L6 isoform X1	Genetic Information Processing	Translation	ko03010//Ribosome	K02934	GO:0022625//cytosolic large ribosomal subunit;GO:0031012//extracellular matrix	GO:0003723//RNA binding;GO:0003735//structural constituent of ribosome	GO:0000027//ribosomal large subunit assembly;GO:0002181//cytoplasmic translation
1	BMSK0012090	18.1026	59.3461	12	2303	0.917	0.832	1.71295	5.41884e-12	8.71457e-08	up	RPS15	AAU11820.1 ribosomal protein S15	Genetic Information Processing	Translation	ko03010//Ribosome	K02958	GO:0015935//small ribosomal subunit	GO:0003723//RNA binding;GO:0003735//structural constituent of ribosome	GO:0006412//translation
1	BMSK0002686	34.8918	106.548	12	2303	1	0.923	1.61054	6.70539e-12	1.07836e-07	up	RpL13	ribosomal protein L13 isoform X1	Genetic Information Processing	Translation	ko03010//Ribosome	K02873	GO:0005840//ribosome	GO:0003735//structural constituent of ribosome	GO:0006412//translation
1	BMSK0013364	24.8357	79.9057	12	2303	0.917	0.876	1.68588	6.91585e-12	1.11221e-07	up	FAU	ribosomal protein S30	Genetic Information Processing	Translation	ko03010//Ribosome	K02983	GO:0022627//cytosolic small ribosomal subunit	GO:0003735//structural constituent of ribosome	GO:0006412//translation
1	BMSK0008161	20.8024	75.9434	12	2303	0.833	0.873	1.86817	7.80307e-12	1.25489e-07	up	RpL28	ribosomal protein L28	Genetic Information Processing	Translation	ko03010//Ribosome	K02903	GO:0005840//ribosome	GO:0003735//structural constituent of ribosome	GO:0006412//translation
1	BMSK0014687	27.4297	79.4576	12	2303	1	0.886	1.53445	8.83428e-12	1.42073e-07	up	pex6	ribosomal protein S25	Cellular Processes	Transport and catabolism	ko04146//Peroxisome	K13339	GO:0005777//peroxisome;GO:0005778//peroxisomal membrane;GO:0005829//cytosol	GO:0005524//ATP binding;GO:0016887//ATPase activity	GO:0006625//protein targeting to peroxisome;GO:0007031//peroxisome organization;GO:0016558//protein import into peroxisome matrix
1	BMSK0002491	46.363	147.391	12	2303	1	0.947	1.66861	1.60931e-11	2.58809e-07	up	RpL19	PDP protein	Genetic Information Processing	Translation	ko03010//Ribosome	K02885	GO:0022625//cytosolic large ribosomal subunit;GO:0022626//cytosolic ribosome	GO:0003723//RNA binding;GO:0003735//structural constituent of ribosome	GO:0002181//cytoplasmic translation
1	BMSK0006560	26.5391	67.0851	12	2303	1	0.85	1.33787	3.12752e-11	5.02968e-07	up	RpL14	ribosomal protein L14	Genetic Information Processing	Translation	ko03010//Ribosome	K02875	GO:0005840//ribosome	GO:0003723//RNA binding;GO:0003735//structural constituent of ribosome	GO:0006412//translation;GO:0043524//negative regulation of neuron apoptotic process
1	BMSK0013084	32.3622	122.945	12	2303	0.917	0.918	1.92563	5.70543e-11	9.17547e-07	up	RPL26	XP 021203193.1 ribosomal protein L26 isoform X1	Genetic Information Processing	Translation	ko03010//Ribosome	K02898	GO:0015934//large ribosomal subunit	GO:0003735//structural constituent of ribosome	GO:0006412//translation
1	BMSK0001031	8.85303	37.0175	12	2303	0.667	0.746	2.06397	1.58127e-10	2.543e-06	up	RpS21	RS21 BOMMO RecName: Full=40S ribosomal protein S21	Genetic Information Processing	Translation	ko03010//Ribosome	K02971	GO:0005791//rough endoplasmic reticulum;GO:0005829//cytosol;GO:0005840//ribosome	GO:0003735//structural constituent of ribosome	GO:0006412//translation
1	BMSK0008190	41.0405	120.783	12	2303	1	0.921	1.5573	2.77564e-10	4.46378e-06	up	RpS16	ribosomal protein S16	Genetic Information Processing	Translation	ko03010//Ribosome	K02960	GO:0005840//ribosome	GO:0003735//structural constituent of ribosome	GO:0006412//translation
1	BMSK0014093	34.8922	145.296	12	2303	0.917	0.932	2.05802	2.79124e-10	4.48888e-06	up	RpL32	ribosomal protein L32	Genetic Information Processing	Translation	ko03010//Ribosome	K02912	GO:0005840//ribosome	GO:0003735//structural constituent of ribosome	GO:0006412//translation
1	BMSK0011289	29.6145	87.1417	12	2303	0.917	0.901	1.55706	3.40235e-10	5.47166e-06	up	Rpl12	ribosomal protein L12	Genetic Information Processing	Translation	ko03010//Ribosome	K02870	GO:0015934//large ribosomal subunit;GO:0022625//cytosolic large ribosomal subunit	GO:0003735//structural constituent of ribosome;GO:0019843//rRNA binding;GO:0070180//large ribosomal subunit rRNA binding	GO:0000027//ribosomal large subunit assembly;GO:0006412//translation;GO:0045901//positive regulation of translational elongation
1	BMSK0014700	21.8724	43.9909	12	2303	1	0.764	1.00809	5.92364e-10	9.5264e-06	up	RpS29	RS29 BOMMO RecName: Full=40S ribosomal protein S29	Genetic Information Processing	Translation	ko03010//Ribosome	K02980	GO:0005791//rough endoplasmic reticulum;GO:0022627//cytosolic small ribosomal subunit;GO:0042788//polysomal ribosome	GO:0003735//structural constituent of ribosome;GO:0008270//zinc ion binding	GO:0002181//cytoplasmic translation
1	BMSK0001120	22.725	71.9613	12	2303	0.917	0.864	1.66294	1.77059e-09	2.84746e-05	up	RpS26	ribosomal protein S26	Genetic Information Processing	Translation	ko03010//Ribosome	K02976	GO:0022627//cytosolic small ribosomal subunit;GO:0042788//polysomal ribosome;GO:0098556//cytoplasmic side of rough endoplasmic reticulum membrane	GO:0003729//mRNA binding;GO:0003735//structural constituent of ribosome	GO:0002181//cytoplasmic translation
1	BMSK0003862	30.6082	92.3993	12	2303	1	0.885	1.59396	2.16831e-09	3.48708e-05	up	RPS27	ribosomal protein S27	Genetic Information Processing	Translation	ko03010//Ribosome	K02978	GO:0005634//nucleus;GO:0014069//postsynaptic density;GO:0022627//cytosolic small ribosomal subunit	GO:0003735//structural constituent of ribosome;GO:0046872//metal ion binding	GO:0000028//ribosomal small subunit assembly;GO:0006364//rRNA processing;GO:0006412//translation
1	BMSK0007663	5.81643	24.3161	12	2303	0.583	0.599	2.06371	2.71589e-09	4.3677e-05	up	RpL31	ribosomal protein L31	Genetic Information Processing	Translation	ko03010//Ribosome	K02910	GO:0005840//ribosome	GO:0003735//structural constituent of ribosome	GO:0006412//translation
1	BMSK0003283	29.0841	67.5937	12	2303	1	0.851	1.21666	3.71535e-09	5.97502e-05	up	RpL15	ribosomal protein L15 isoform X1	Genetic Information Processing	Translation	ko03010//Ribosome	K02877	GO:0022625//cytosolic large ribosomal subunit	GO:0003723//RNA binding;GO:0003735//structural constituent of ribosome	GO:0002181//cytoplasmic translation
1	BMSK0001224	18.1081	51.4396	12	2303	0.917	0.826	1.50624	7.10964e-09	0.000114337	up	Rack1	AEH16566.1 receptor for activated protein kinase C	Human Diseases	Infectious diseases	ko05162//Measles	K14753	GO:0005634//nucleus;GO:0005737//cytoplasm;GO:0005776//autophagosome;GO:0005829//cytosol;GO:0022627//cytosolic small ribosomal subunit;GO:0071011//precatalytic spliceosome;GO:0071013//catalytic step 2 spliceosome	GO:0005080//protein kinase C binding;GO:0019899//enzyme binding;GO:0043022//ribosome binding	GO:0000398//mRNA splicing, via spliceosome;GO:0001933//negative regulation of protein phosphorylation;GO:0001934//positive regulation of protein phosphorylation;GO:0007626//locomotory behavior;GO:0009267//cellular response to starvation;GO:0016243//regulation of autophagosome size;GO:0018991//oviposition;GO:0030838//positive regulation of actin filament polymerization;GO:0035220//wing disc develo…
1	BMSK0002059	37.4822	95.2606	12	2303	1	0.897	1.34567	1.05336e-08	0.000169402	up	RpS18	ribosomal protein S18	Genetic Information Processing	Translation	ko03010//Ribosome	K02964	GO:0005840//ribosome	GO:0003735//structural constituent of ribosome;GO:0019843//rRNA binding	GO:0006412//translation
1	BMSK0001352	33.1872	93.6703	12	2303	1	0.893	1.49696	1.09096e-08	0.000175448	up	RpL11	ribosomal protein L11	Genetic Information Processing	Translation	ko03010//Ribosome	K02868	GO:0005730//nucleolus;GO:0005737//cytoplasm;GO:0022625//cytosolic large ribosomal subunit;GO:0022626//cytosolic ribosome	GO:0003735//structural constituent of ribosome;GO:0019843//rRNA binding	GO:0000027//ribosomal large subunit assembly;GO:0002181//cytoplasmic translation
1	BMSK0004953	30.1357	56.8168	12	2303	1	0.82	0.914844	1.78835e-08	0.000287603	up	RpL24	ribosomal protein L24	Genetic Information Processing	Translation	ko03010//Ribosome	K02896	GO:0005840//ribosome	-	-
1	BMSK0002290	65.5378	209.981	12	2303	1	0.971	1.67986	3.93218e-08	0.000632374	up	Tctp	translationally-controlled tumor protein homolog isoform X2	-	-	-	-	GO:0005737//cytoplasm	-	-
1	BMSK0013482	43.9111	106.532	12	2303	1	0.927	1.27862	4.23878e-08	0.000681681	up	-	ABN09652.1 ubiquitin-ribosomal protein S27a fusion	Genetic Information Processing	Translation	ko03010//Ribosome	K02977	GO:0005634//nucleus;GO:0005840//ribosome	GO:0003735//structural constituent of ribosome;GO:0046872//metal ion binding	GO:0006412//translation
1	BMSK0008657	13.0453	55.6924	12	2303	0.667	0.825	2.09396	1.01537e-07	0.00163292	up	RpL30	ribosomal protein L30 isoform X1	Genetic Information Processing	Translation	ko03010//Ribosome	K02908	GO:0005840//ribosome	GO:0003723//RNA binding;GO:0003735//structural constituent of ribosome	GO:0006412//translation
1	BMSK0001139	21.0021	51.8482	12	2303	0.917	0.813	1.30376	1.27852e-07	0.00205612	up	RpL34	ibosomal protein L34 isoform X1	Genetic Information Processing	Translation	ko03010//Ribosome	K02915	GO:0005840//ribosome	GO:0003735//structural constituent of ribosome	GO:0006412//translation
1	BMSK0012016	5.71362	20.3035	12	2303	0.667	0.53	1.82925	1.95843e-07	0.00314954	up	Hrb27C	hnRNPA/B-like 28 isoform X2	Genetic Information Processing	Translation	ko03015//mRNA surveillance pathway	K14411	GO:0005634//nucleus;GO:0005654//nucleoplasm;GO:0005737//cytoplasm;GO:0032991//macromolecular complex;GO:0043186//P granule;GO:1990904//ribonucleoprotein complex	GO:0003697//single-stranded DNA binding;GO:0003723//RNA binding;GO:0003729//mRNA binding;GO:0003730//mRNA 3'-UTR binding;GO:0008266//poly(U) RNA binding;GO:0034046//poly(G) binding;GO:0048027//mRNA 5'-UTR binding	GO:0007283//spermatogenesis;GO:0007319//negative regulation of oskar mRNA translation;GO:0007411//axon guidance;GO:0045451//pole plasm oskar mRNA localization;GO:0045727//positive regulation of translation;GO:0048024//regulation of mRNA splicing, via spliceosome;GO:0048026//positive regulation of mRNA splicing, via spliceosome;GO:1903688//positive regulation of border follicle cell migration
1	BMSK0015942	31.4703	88.1596	12	2303	0.917	0.875	1.48613	2.85867e-07	0.00459732	up	RPS11	AAU11818.1 ribosomal protein S11	Genetic Information Processing	Translation	ko03010//Ribosome	K02949	GO:0022627//cytosolic small ribosomal subunit	GO:0003735//structural constituent of ribosome;GO:0019843//rRNA binding	GO:0006412//translation
1	BMSK0007162	32.88	64.5692	12	2303	1	0.85	0.973636	2.86096e-07	0.004601	up	RpL40	ubiquitin	Genetic Information Processing	Translation	ko03010//Ribosome	K02927	GO:0005634//nucleus;GO:0005737//cytoplasm;GO:0005829//cytosol;GO:0022625//cytosolic large ribosomal subunit;GO:0022627//cytosolic small ribosomal subunit	GO:0003735//structural constituent of ribosome;GO:0031386//protein tag;GO:0031625//ubiquitin protein ligase binding	GO:0002181//cytoplasmic translation;GO:0006412//translation;GO:0006464//cellular protein modification process;GO:0006511//ubiquitin-dependent protein catabolic process;GO:0016567//protein ubiquitination;GO:0019941//modification-dependent protein catabolic process
1	BMSK0000895	22.8822	43.3432	12	2303	1	0.767	0.921579	4.10814e-07	0.00660671	up	RpL23-B,RpL23-A,RpL23-C	60S ribosomal protein L23 [Papilio polytes]	Genetic Information Processing	Translation	ko03010//Ribosome	K02894	GO:0005840//ribosome	GO:0003735//structural constituent of ribosome	GO:0006412//translation
1	BMSK0001321	19.0101	54.3301	12	2303	0.833	0.806	1.51499	4.29384e-07	0.00690535	up	RpL13A	ribosomal protein L13A	Genetic Information Processing	Translation	ko03010//Ribosome	K02872	GO:0015934//large ribosomal subunit	GO:0003735//structural constituent of ribosome	GO:0006412//translation
1	BMSK0010922	25.4734	58.1232	12	2303	0.917	0.823	1.19012	4.42325e-07	0.00711346	up	RpS9	ribosomal protein S9	Genetic Information Processing	Translation	ko03010//Ribosome	K02997	GO:0005730//nucleolus;GO:0005737//cytoplasm;GO:0005829//cytosol;GO:0022626//cytosolic ribosome;GO:0022627//cytosolic small ribosomal subunit	GO:0003735//structural constituent of ribosome;GO:0019843//rRNA binding	GO:0002181//cytoplasmic translation;GO:0045903//positive regulation of translational fidelity
1	BMSK0013760	22.1097	69.517	12	2303	0.917	0.896	1.65269	5.18358e-07	0.00833623	up	-	-	-	-	-	-	-	-	-
											48
Cluster	GeneID	CK	BmNPV	cells.1	cells.2	pct.1	pct.2	log2FC	p_value	p_val_adjust	significance	Symbol	Description	KEGG_A_class	KEGG_B_class	Pathway	K_ID	GO Component	GO Function	GO Process
1	BMSK0013765	46.657	0.0371778	12	2303	1	0.001	-10.2934	2.19798e-29	3.5348e-25	down	21G1	AFC87817.1 30K protein 19	-	-	-	-	GO:0005576//extracellular region	-	-
1	BMSK0002915	128.122	0.0673912	12	2303	1	0.002	-10.8927	1.12341e-28	1.80667e-24	down	atl	atlastin	-	-	-	-	GO:0000139//Golgi membrane;GO:0005737//cytoplasm;GO:0005783//endoplasmic reticulum;GO:0005794//Golgi apparatus;GO:0012505//endomembrane system;GO:0016020//membrane;GO:0016021//integral component of membrane;GO:0031227//intrinsic component of endoplasmic reticulum membrane	GO:0003924//GTPase activity;GO:0005525//GTP binding;GO:0032561//guanyl ribonucleotide binding;GO:0042802//identical protein binding;GO:0042803//protein homodimerization activity	GO:0007019//microtubule depolymerization;GO:0007029//endoplasmic reticulum organization;GO:0007030//Golgi organization;GO:0007517//muscle organ development;GO:0007528//neuromuscular junction development;GO:0008582//regulation of synaptic growth at neuromuscular junction;GO:0016320//endoplasmic reticulum membrane fusion;GO:0031114//regulation of microtubule depolymerization;GO:0048691//positive re…
1	BMSK0009085	245.104	0.7009	12	2303	1	0.025	-8.44997	4.86887e-27	7.83012e-23	down	-	pro-phenol oxidase [Bombyx mandarina]	-	-	-	-	GO:0005576//extracellular region	GO:0004503//monophenol monooxygenase activity;GO:0046872//metal ion binding	GO:0006583//melanin biosynthetic process from tyrosine;GO:0006952//defense response
1	BMSK0009475	222.833	0.385421	12	2303	1	0.015	-9.17531	1.35772e-26	2.18348e-22	down	-	PRP2 BOMMO RecName: Full=Phenoloxidase subunit 2; AltName: Full=PO 2; AltName: Full=Tyrosinase 2; Flags: Precursor	-	-	-	-	GO:0005576//extracellular region	GO:0004503//monophenol monooxygenase activity;GO:0046872//metal ion binding	GO:0006583//melanin biosynthetic process from tyrosine;GO:0006952//defense response
1	BMSK0002971	52.3175	0.0280133	12	2303	0.917	0.001	-10.867	3.69788e-26	5.94693e-22	down	atl	atlastin	-	-	-	-	GO:0000139//Golgi membrane;GO:0005737//cytoplasm;GO:0005783//endoplasmic reticulum;GO:0005794//Golgi apparatus;GO:0012505//endomembrane system;GO:0016020//membrane;GO:0016021//integral component of membrane;GO:0031227//intrinsic component of endoplasmic reticulum membrane	GO:0003924//GTPase activity;GO:0005525//GTP binding;GO:0032561//guanyl ribonucleotide binding;GO:0042802//identical protein binding;GO:0042803//protein homodimerization activity	GO:0007019//microtubule depolymerization;GO:0007029//endoplasmic reticulum organization;GO:0007030//Golgi organization;GO:0007517//muscle organ development;GO:0007528//neuromuscular junction development;GO:0008582//regulation of synaptic growth at neuromuscular junction;GO:0016320//endoplasmic reticulum membrane fusion;GO:0031114//regulation of microtubule depolymerization;GO:0048691//positive re…
1	BMSK0013101	29.454	0.0632344	12	2303	0.917	0.002	-8.86354	5.65069e-25	9.08744e-21	down	Acy1	aminoacylase	Metabolism;Metabolism;Metabolism;Metabolism	Global and overview maps;Global and overview maps;Amino acid metabolism;Global and overview maps	ko01100//Metabolic pathways;ko01230//Biosynthesis of amino acids;ko00220//Arginine biosynthesis;ko01210//2-Oxocarboxylic acid metabolism	K14677;K14677;K14677;K14677	GO:0005737//cytoplasm;GO:0070062//extracellular exosome	GO:0004046//aminoacylase activity;GO:0008237//metallopeptidase activity;GO:0042802//identical protein binding;GO:0046872//metal ion binding	GO:0006520//cellular amino acid metabolic process
1	BMSK0003871	67.6835	0.319895	12	2303	1	0.011	-7.72506	1.41059e-23	2.2685e-19	down	hyi	hydroxypyruvate isomerase	Metabolism;Metabolism	Global and overview maps;Carbohydrate metabolism	ko01100//Metabolic pathways;ko00630//Glyoxylate and dicarboxylate metabolism	K01816;K01816	-	GO:0008903//hydroxypyruvate isomerase activity;GO:0016857//racemase and epimerase activity, acting on carbohydrates and derivatives	-
1	BMSK0003118	157.78	2.77287	12	2303	1	0.118	-5.83039	2.53609e-23	4.07854e-19	down	ost-1	secreted protein acidic and rich in cysteine	-	-	-	-	GO:0005604//basement membrane;GO:0005615//extracellular space	GO:0005509//calcium ion binding;GO:0005518//collagen binding;GO:0050840//extracellular matrix binding	GO:0007275//multicellular organism development
1	BMSK0010790	29.8569	0.321341	12	2303	1	0.016	-6.53782	3.51396e-21	5.65115e-17	down	FH	Fumarase C C-terminus	-	-	-	-	GO:0005737//cytoplasm;GO:0005739//mitochondrion;GO:0005759//mitochondrial matrix;GO:0045239//tricarboxylic acid cycle enzyme complex;GO:0070062//extracellular exosome	GO:0004333//fumarate hydratase activity	GO:0006099//tricarboxylic acid cycle;GO:0006106//fumarate metabolic process;GO:0006108//malate metabolic process;GO:0048873//homeostasis of number of cells within a tissue
1	BMSK0012537	23.8632	0.214336	12	2303	0.917	0.009	-6.79877	1.14132e-20	1.83547e-16	down	-	27 kDa glycoprotein precursor	-	-	-	-	GO:0005576//extracellular region	-	-
1	BMSK0005300	16.8968	0.112584	12	2303	0.833	0.004	-7.22961	1.36354e-20	2.19285e-16	down	-	Hemocytin [Papilio machaon]	-	-	-	-	-	GO:0030246//carbohydrate binding	GO:0007155//cell adhesion
1	BMSK0007290	15.9678	0.100633	12	2303	0.833	0.005	-7.30991	6.01696e-20	9.67648e-16	down	Srm	spermidine synthase	Metabolism;Metabolism;Metabolism;Metabolism;Metabolism	Global and overview maps;Metabolism of other amino acids;Amino acid metabolism;Amino acid metabolism;Metabolism of other amino acids	ko01100//Metabolic pathways;ko00480//Glutathione metabolism;ko00270//Cysteine and methionine metabolism;ko00330//Arginine and proline metabolism;ko00410//beta-Alanine metabolism	K00797;K00797;K00797;K00797;K00797	-	GO:0004766//spermidine synthase activity;GO:0042802//identical protein binding;GO:0042803//protein homodimerization activity	GO:0006596//polyamine biosynthetic process;GO:0008295//spermidine biosynthetic process;GO:1990830//cellular response to leukemia inhibitory factor
1	BMSK0013762	6.71791	0.0203857	12	2303	0.667	0	-8.36431	5.02299e-19	8.07796e-15	down	21G1	AFC87814.1 30K protein 16	-	-	-	-	GO:0005576//extracellular region	-	-
1	BMSK0014489	18.7609	0.276974	12	2303	0.917	0.013	-6.08184	6.27487e-19	1.00912e-14	down	SLC31A1	copper transporter	Human Diseases;Organismal Systems	Drug resistance;Digestive system	ko01524//Platinum drug resistance;ko04978//Mineral absorption	K14686;K14686	GO:0005770//late endosome;GO:0005886//plasma membrane;GO:0005887//integral component of plasma membrane;GO:0043025//neuronal cell body;GO:0055037//recycling endosome	GO:0005375//copper ion transmembrane transporter activity;GO:0042802//identical protein binding	GO:0006825//copper ion transport;GO:0006855//drug transmembrane transport;GO:0006878//cellular copper ion homeostasis;GO:0072719//cellular response to cisplatin;GO:0098705//copper ion import across plasma membrane
1	BMSK0014159	22.3995	0.0822663	12	2303	0.75	0.003	-8.08895	6.98267e-19	1.12295e-14	down	21G1	AFC87819.1 30K protein 21	-	-	-	-	GO:0005576//extracellular region	-	-
1	BMSK0009962	14.6569	0.363381	12	2303	0.917	0.016	-5.33395	1.81971e-18	2.92646e-14	down	-	uncharacterized protein LOC106119200 isoform X1 [Papilio xuthus]	-	-	-	-	-	-	-
1	BMSK0004544	399.624	60.6954	12	2303	1	0.849	-2.71899	3.02144e-18	4.85909e-14	down	-	putative cuticle protein CPH43	-	-	-	-	-	-	-
1	BMSK0001981	84.9984	0.770675	12	2303	0.917	0.034	-6.78517	5.1781e-18	8.32741e-14	down	-	collagen alpha-1(IV) chain [Papilio xuthus]	Human Diseases;Human Diseases;Environmental Information Processing;Cellular Processes;Organismal Systems;Organismal Systems;Human Diseases;Human Diseases;Human Diseases;Environmental Information Processing	Cancers;Infectious diseases;Signal transduction;Cellular community - eukaryotes;Digestive system;Endocrine system;Cancers;Endocrine and metabolic diseases;Infectious diseases;Signaling molecules and interaction	ko05200//Pathways in cancer;ko05165//Human papillomavirus infection;ko04151//PI3K-Akt signaling pathway;ko04510//Focal adhesion;ko04974//Protein digestion and absorption;ko04926//Relaxin signaling pathway;ko05222//Small cell lung cancer;ko04933//AGE-RAGE signaling pathway in diabetic complications;ko05146//Amoebiasis;ko04512//ECM-receptor interaction	K06237;K06237;K06237;K06237;K06237;K06237;K06237;K06237;K06237;K06237	GO:0005581//collagen trimer;GO:0005604//basement membrane	GO:0005201//extracellular matrix structural constituent	-
1	BMSK0009246	23.3611	0.282549	12	2303	0.833	0.012	-6.36946	8.51112e-17	1.36876e-12	down	BLMH	bleomycin hydrolase isoform X1 [Amyelois transitella]	-	-	-	-	GO:0005634//nucleus;GO:0005737//cytoplasm;GO:0005829//cytosol;GO:0070062//extracellular exosome	GO:0004177//aminopeptidase activity;GO:0004180//carboxypeptidase activity;GO:0004197//cysteine-type endopeptidase activity;GO:0008234//cysteine-type peptidase activity;GO:0042802//identical protein binding	GO:0000209//protein polyubiquitination;GO:0006508//proteolysis;GO:0009636//response to toxic substance;GO:0042493//response to drug;GO:0043418//homocysteine catabolic process
1	BMSK0013103	8.37162	0.058637	12	2303	0.583	0.001	-7.15755	3.15781e-15	5.07839e-11	down	Acy1	XP 012545260.1 aminoacylase-1	Metabolism;Metabolism;Metabolism;Metabolism	Global and overview maps;Global and overview maps;Amino acid metabolism;Global and overview maps	ko01100//Metabolic pathways;ko01230//Biosynthesis of amino acids;ko00220//Arginine biosynthesis;ko01210//2-Oxocarboxylic acid metabolism	K14677;K14677;K14677;K14677	GO:0005737//cytoplasm;GO:0070062//extracellular exosome	GO:0004046//aminoacylase activity;GO:0008237//metallopeptidase activity;GO:0042802//identical protein binding;GO:0046872//metal ion binding	GO:0006520//cellular amino acid metabolic process
1	BMSK0015667	66.2038	3.3819	12	2303	1	0.122	-4.29101	3.62707e-15	5.83306e-11	down	Hsp83	heat shock protein 83	Human Diseases;Genetic Information Processing;Environmental Information Processing;Organismal Systems;Human Diseases;Organismal Systems;Human Diseases;Cellular Processes;Organismal Systems;Organismal Systems;Organismal Systems;Organismal Systems	Cancers;Folding, sorting and degradation;Signal transduction;Endocrine system;Cardiovascular diseases;Endocrine system;Cancers;Cell growth and death;Immune system;Immune system;Immune system;Immune system	ko05200//Pathways in cancer;ko04141//Protein processing in endoplasmic reticulum;ko04151//PI3K-Akt signaling pathway;ko04915//Estrogen signaling pathway;ko05418//Fluid shear stress and atherosclerosis;ko04914//Progesterone-mediated oocyte maturation;ko05215//Prostate cancer;ko04217//Necroptosis;ko04621//NOD-like receptor signaling pathway;ko04612//Antigen processing and presentation;ko04657//IL-1…	K04079;K04079;K04079;K04079;K04079;K04079;K04079;K04079;K04079;K04079;K04079;K04079	GO:0005737//cytoplasm	GO:0005524//ATP binding;GO:0051082//unfolded protein binding	GO:0006457//protein folding
1	BMSK0005775	4.68092	0.0214864	12	2303	0.583	0.001	-7.76723	3.92891e-15	6.31848e-11	down	-	uncharacterized protein LOC101739343	Organismal Systems	Development	ko04360//Axon guidance	K07525	-	-	-
1	BMSK0003272	15.5453	0.225357	12	2303	0.667	0.007	-6.10812	9.45033e-14	1.5198e-09	down	ME1	malate dehydrogenase isoform X1	Metabolism;Metabolism;Organismal Systems;Metabolism	Global and overview maps;Global and overview maps;Endocrine system;Carbohydrate metabolism	ko01100//Metabolic pathways;ko01200//Carbon metabolism;ko03320//PPAR signaling pathway;ko00620//Pyruvate metabolism	K00029;K00029;K00029;K00029	GO:0005737//cytoplasm	GO:0004471//malate dehydrogenase (decarboxylating) (NAD+) activity;GO:0004473//malate dehydrogenase (decarboxylating) (NADP+) activity;GO:0008948//oxaloacetate decarboxylase activity;GO:0046872//metal ion binding;GO:0051287//NAD binding	-
1	BMSK0001420	3.96246	0.0216802	12	2303	0.5	0.001	-7.51388	3.49178e-13	5.61548e-09	down	-	runt-related transcription factor 3	Environmental Information Processing	Signal transduction	ko04013//MAPK signaling pathway - fly	K20214	-	-	-
1	BMSK0005520	16.7819	0.874624	12	2303	0.833	0.033	-4.2621	4.29407e-13	6.90572e-09	down	tmbim6	Bax inhibitor-1-like protein	-	-	-	-	GO:0005789//endoplasmic reticulum membrane;GO:0016021//integral component of membrane	-	GO:0006915//apoptotic process;GO:0006986//response to unfolded protein;GO:0043066//negative regulation of apoptotic process
1	BMSK0001159	4.34929	0.123541	12	2303	0.583	0.005	-5.13772	4.39851e-13	7.07369e-09	down	SamDC	S-adenosylmethionine decarboxylase proenzyme isoform X1	Metabolism;Metabolism;Metabolism	Global and overview maps;Amino acid metabolism;Amino acid metabolism	ko01100//Metabolic pathways;ko00270//Cysteine and methionine metabolism;ko00330//Arginine and proline metabolism	K01611;K01611;K01611	GO:0005829//cytosol	GO:0004014//adenosylmethionine decarboxylase activity	GO:0006557//S-adenosylmethioninamine biosynthetic process;GO:0006597//spermine biosynthetic process;GO:0008295//spermidine biosynthetic process;GO:0050829//defense response to Gram-negative bacterium
1	BMSK0003260	52.4438	0.931578	12	2303	0.833	0.042	-5.81495	6.40717e-13	1.0304e-08	down	NLGN1	carboxylesterase clade H, member 1 precursor	-	-	-	-	GO:0005794//Golgi apparatus;GO:0005886//plasma membrane;GO:0005887//integral component of plasma membrane;GO:0009897//external side of plasma membrane;GO:0009986//cell surface;GO:0014069//postsynaptic density;GO:0017146//NMDA selective glutamate receptor complex;GO:0030054//cell junction;GO:0030425//dendrite;GO:0032433//filopodium tip;GO:0043197//dendritic spine;GO:0043198//dendritic shaft;GO:004…	GO:0001540//beta-amyloid binding;GO:0030165//PDZ domain binding;GO:0038023//signaling receptor activity;GO:0042043//neurexin family protein binding;GO:0046983//protein dimerization activity;GO:0050839//cell adhesion molecule binding;GO:0097110//scaffold protein binding	GO:0002087//regulation of respiratory gaseous exchange by neurological system process;GO:0006605//protein targeting;GO:0007157//heterophilic cell-cell adhesion via plasma membrane cell adhesion molecules;GO:0007158//neuron cell-cell adhesion;GO:0007399//nervous system development;GO:0007416//synapse assembly;GO:0010841//positive regulation of circadian sleep/wake cycle, wakefulness;GO:0016080//sy…
1	BMSK0008943	7.89739	0.860052	12	2303	0.75	0.034	-3.19888	2.65212e-12	4.26513e-08	down	-	uncharacterized protein LOC101740352	-	-	-	-	-	-	-
1	BMSK0000106	17.8167	0.526147	12	2303	0.75	0.024	-5.08162	4.72831e-12	7.60406e-08	down	LanA	laminin subunit alpha	Metabolism;Human Diseases;Human Diseases;Environmental Information Processing;Cellular Processes;Human Diseases;Human Diseases;Human Diseases;Environmental Information Processing	Global and overview maps;Cancers;Infectious diseases;Signal transduction;Cellular community - eukaryotes;Infectious diseases;Cancers;Infectious diseases;Signaling molecules and interaction	ko01100//Metabolic pathways;ko05200//Pathways in cancer;ko05165//Human papillomavirus infection;ko04151//PI3K-Akt signaling pathway;ko04510//Focal adhesion;ko05145//Toxoplasmosis;ko05222//Small cell lung cancer;ko05146//Amoebiasis;ko04512//ECM-receptor interaction	K06240;K06240;K06240;K06240;K06240;K06240;K06240;K06240;K06240	GO:0005604//basement membrane;GO:0008021//synaptic vesicle;GO:0030054//cell junction;GO:0030424//axon;GO:0036062//presynaptic periactive zone	GO:0005102//receptor binding	GO:0007411//axon guidance;GO:0007498//mesoderm development;GO:0007507//heart development;GO:0016321//female meiosis chromosome segregation;GO:0030155//regulation of cell adhesion;GO:0030334//regulation of cell migration;GO:0033627//cell adhesion mediated by integrin;GO:0034446//substrate adhesion-dependent cell spreading;GO:0035001//dorsal trunk growth, open tracheal system;GO:0035011//melanotic …
1	BMSK0015870	10.2235	0.116924	12	2303	0.583	0.006	-6.45018	5.04726e-12	8.117e-08	down	-	-	-	-	-	-	-	-	-
1	BMSK0003438	9.6984	1.48148	12	2303	0.833	0.061	-2.71071	1.00316e-11	1.61328e-07	down	-	-	-	-	-	-	-	-	-
1	BMSK0010774	7.52782	0.180865	12	2303	0.583	0.007	-5.37925	1.00649e-11	1.61863e-07	down	CD63	tetraspanin E118 isoform X1	Human Diseases;Cellular Processes	Cancers;Transport and catabolism	ko05205//Proteoglycans in cancer;ko04142//Lysosome	K06497;K06497	GO:0005765//lysosomal membrane;GO:0005887//integral component of plasma membrane;GO:0009986//cell surface;GO:0031226//intrinsic component of plasma membrane;GO:0031902//late endosome membrane;GO:0032585//multivesicular body membrane;GO:0042470//melanosome;GO:0070062//extracellular exosome;GO:0097487//multivesicular body, internal vesicle	-	GO:0002092//positive regulation of receptor internalization;GO:0007160//cell-matrix adhesion;GO:0007166//cell surface receptor signaling pathway;GO:0015031//protein transport;GO:0016477//cell migration;GO:0035646//endosome to melanosome transport;GO:0045807//positive regulation of endocytosis;GO:0048757//pigment granule maturation;GO:1900746//regulation of vascular endothelial growth factor signa…
1	BMSK0014479	6.83326	0.178957	12	2303	0.583	0.008	-5.25489	1.94904e-11	3.13445e-07	down	Ser	protein serrate	Human Diseases;Human Diseases;Environmental Information Processing;Human Diseases;Human Diseases;Environmental Information Processing;Environmental Information Processing;Organismal Systems	Cancers;Infectious diseases;Signal transduction;Cancers;Drug resistance;Signal transduction;Signal transduction;Immune system	ko05200//Pathways in cancer;ko05165//Human papillomavirus infection;ko04371//Apelin signaling pathway;ko05224//Breast cancer;ko01522//Endocrine resistance;ko04668//TNF signaling pathway;ko04330//Notch signaling pathway;ko04658//Th1 and Th2 cell differentiation	K06052;K06052;K06052;K06052;K06052;K06052;K06052;K06052	GO:0005886//plasma membrane;GO:0009986//cell surface;GO:0016021//integral component of membrane;GO:0016324//apical plasma membrane;GO:0030673//axolemma;GO:0045179//apical cortex	GO:0005112//Notch binding;GO:0005509//calcium ion binding;GO:0043208//glycosphingolipid binding;GO:0048018//receptor agonist activity	GO:0007219//Notch signaling pathway;GO:0007423//sensory organ development;GO:0007435//salivary gland morphogenesis;GO:0007436//larval salivary gland morphogenesis;GO:0007476//imaginal disc-derived wing morphogenesis;GO:0008587//imaginal disc-derived wing margin morphogenesis;GO:0014009//glial cell proliferation;GO:0016330//second mitotic wave involved in compound eye morphogenesis;GO:0030718//ger…
1	BMSK0007560	20.8308	0.723002	12	2303	0.75	0.03	-4.84857	2.16521e-11	3.48209e-07	down	LanB1	laminin subunit beta-1	Human Diseases;Human Diseases;Environmental Information Processing;Cellular Processes;Human Diseases;Human Diseases;Human Diseases;Environmental Information Processing	Cancers;Infectious diseases;Signal transduction;Cellular community - eukaryotes;Infectious diseases;Cancers;Infectious diseases;Signaling molecules and interaction	ko05200//Pathways in cancer;ko05165//Human papillomavirus infection;ko04151//PI3K-Akt signaling pathway;ko04510//Focal adhesion;ko05145//Toxoplasmosis;ko05222//Small cell lung cancer;ko05146//Amoebiasis;ko04512//ECM-receptor interaction	K05636;K05636;K05636;K05636;K05636;K05636;K05636;K05636	GO:0005604//basement membrane	-	GO:0003143//embryonic heart tube morphogenesis;GO:0008406//gonad development;GO:0016477//cell migration;GO:0030198//extracellular matrix organization;GO:0033627//cell adhesion mediated by integrin;GO:0034446//substrate adhesion-dependent cell spreading;GO:0045089//positive regulation of innate immune response;GO:0048513//animal organ development;GO:0050829//defense response to Gram-negative bacte…
1	BMSK0006315	5.09753	0.00813139	12	2303	0.417	0	-9.29208	2.75082e-11	4.42388e-07	down	-	balbiani ring protein 3-like [Amyelois transitella]	-	-	-	-	-	-	-
1	BMSK0013661	3.84483	0.00501404	12	2303	0.417	0	-9.58273	2.78329e-11	4.47609e-07	down	crq	scavenger receptor class B member 1-like [Amyelois transitella]	-	-	-	-	GO:0005886//plasma membrane;GO:0016021//integral component of membrane	GO:0005044//scavenger receptor activity	GO:0002433//immune response-regulating cell surface receptor signaling pathway involved in phagocytosis;GO:0006909//phagocytosis;GO:0006911//phagocytosis, engulfment;GO:0006915//apoptotic process;GO:0006955//immune response;GO:0042116//macrophage activation;GO:0048102//autophagic cell death;GO:0050764//regulation of phagocytosis;GO:0090382//phagosome maturation
1	BMSK0010792	7.12126	0.00575884	12	2303	0.417	0	-10.2721	2.79472e-11	4.49447e-07	down	FH	fumarate hydratase, mitochondrial-like [Papilio polytes]	Metabolism;Human Diseases;Metabolism;Human Diseases;Metabolism;Human Diseases;Metabolism	Global and overview maps;Cancers;Global and overview maps;Endocrine and metabolic diseases;Carbohydrate metabolism;Cancers;Carbohydrate metabolism	ko01100//Metabolic pathways;ko05200//Pathways in cancer;ko01200//Carbon metabolism;ko04934//Cushing syndrome;ko00020//Citrate cycle (TCA cycle);ko05211//Renal cell carcinoma;ko00620//Pyruvate metabolism	K01679;K01679;K01679;K01679;K01679;K01679;K01679	GO:0005739//mitochondrion;GO:0045239//tricarboxylic acid cycle enzyme complex	GO:0004333//fumarate hydratase activity	GO:0006099//tricarboxylic acid cycle;GO:0006106//fumarate metabolic process;GO:0006108//malate metabolic process
1	BMSK0014898	52.4336	3.53196	12	2303	0.917	0.136	-3.89195	4.07862e-11	6.55923e-07	down	Ppn	Kunitz/Bovine pancreatic trypsin inhibitor domain	-	-	-	-	GO:0005604//basement membrane	GO:0004867//serine-type endopeptidase inhibitor activity;GO:0005201//extracellular matrix structural constituent;GO:0008233//peptidase activity	GO:0007275//multicellular organism development;GO:0030198//extracellular matrix organization
1	BMSK0010200	14.7528	2.42453	12	2303	0.917	0.094	-2.60521	4.19236e-11	6.74216e-07	down	-	transgelin	-	-	-	-	-	-	-
1	BMSK0001288	26.5172	1.29277	12	2303	0.833	0.053	-4.35839	4.39473e-11	7.06761e-07	down	-	uncharacterized protein LOC101743420	-	-	-	-	-	-	-
1	BMSK0011580	7.16055	0.474622	12	2303	0.667	0.022	-3.91522	5.05089e-11	8.12284e-07	down	DERL1	Der1-like domain family member 1	Genetic Information Processing;Human Diseases	Folding, sorting and degradation;Neurodegenerative diseases	ko04141//Protein processing in endoplasmic reticulum;ko05014//Amyotrophic lateral sclerosis (ALS)	K11519;K11519	GO:0005769//early endosome;GO:0005770//late endosome;GO:0005785//signal recognition particle receptor complex;GO:0030176//integral component of endoplasmic reticulum membrane;GO:0036502//Derlin-1-VIMP complex;GO:0036513//Derlin-1 retrotranslocation complex;GO:0048500//signal recognition particle	GO:0031625//ubiquitin protein ligase binding;GO:0042288//MHC class I protein binding;GO:0051117//ATPase binding;GO:1990381//ubiquitin-specific protease binding	GO:0030433//ER-associated ubiquitin-dependent protein catabolic process;GO:0030968//endoplasmic reticulum unfolded protein response;GO:0030970//retrograde protein transport, ER to cytosol;GO:0031398//positive regulation of protein ubiquitination;GO:0031648//protein destabilization;GO:0032092//positive regulation of protein binding;GO:0051260//protein homooligomerization;GO:0071712//ER-associated …
1	BMSK0013355	4.69963	0.308474	12	2303	0.583	0.013	-3.92933	5.18574e-11	8.33971e-07	down	KDM3A	lysine-specific demethylase 3B	Organismal Systems	Environmental adaptation	ko04714//Thermogenesis	K15601	GO:0000785//chromatin;GO:0005634//nucleus;GO:0005737//cytoplasm	GO:0000976//transcription regulatory region sequence-specific DNA binding;GO:0031490//chromatin DNA binding;GO:0032454//histone demethylase activity (H3-K9 specific);GO:0046872//metal ion binding;GO:0051213//dioxygenase activity	GO:0033169//histone H3-K9 demethylation
1	BMSK0004593	4.58626	0.220865	12	2303	0.583	0.012	-4.37608	6.83329e-11	1.09893e-06	down	PRPF8	pre-mR -processing-splicing factor 8	Genetic Information Processing	Transcription	ko03040//Spliceosome	K12856	GO:0005634//nucleus;GO:0005654//nucleoplasm;GO:0005682//U5 snRNP;GO:0016020//membrane;GO:0016607//nuclear speck;GO:0046540//U4/U6 x U5 tri-snRNP complex;GO:0071005//U2-type precatalytic spliceosome;GO:0071007//U2-type catalytic step 2 spliceosome;GO:0071013//catalytic step 2 spliceosome	GO:0000386//second spliceosomal transesterification activity;GO:0003723//RNA binding;GO:0017070//U6 snRNA binding;GO:0030619//U1 snRNA binding;GO:0030620//U2 snRNA binding;GO:0030623//U5 snRNA binding;GO:0070530//K63-linked polyubiquitin binding;GO:0097157//pre-mRNA intronic binding	GO:0000244//spliceosomal tri-snRNP complex assembly;GO:0000375//RNA splicing, via transesterification reactions;GO:0000398//mRNA splicing, via spliceosome;GO:0006397//mRNA processing;GO:0008380//RNA splicing;GO:0071222//cellular response to lipopolysaccharide;GO:0071356//cellular response to tumor necrosis factor
1	BMSK0010634	8.26652	0.510957	12	2303	0.667	0.023	-4.01601	7.33577e-11	1.17974e-06	down	-	uncharacterized protein LOC101746298	-	-	-	-	-	-	-
1	BMSK0001980	64.1566	2.07518	12	2303	0.667	0.087	-4.95029	8.8965e-11	1.43074e-06	down	COL4A5	collagen alpha-2(IV) chain	Human Diseases;Human Diseases;Environmental Information Processing;Cellular Processes;Organismal Systems;Organismal Systems;Human Diseases;Human Diseases;Human Diseases;Environmental Information Processing	Cancers;Infectious diseases;Signal transduction;Cellular community - eukaryotes;Digestive system;Endocrine system;Cancers;Endocrine and metabolic diseases;Infectious diseases;Signaling molecules and interaction	ko05200//Pathways in cancer;ko05165//Human papillomavirus infection;ko04151//PI3K-Akt signaling pathway;ko04510//Focal adhesion;ko04974//Protein digestion and absorption;ko04926//Relaxin signaling pathway;ko05222//Small cell lung cancer;ko04933//AGE-RAGE signaling pathway in diabetic complications;ko05146//Amoebiasis;ko04512//ECM-receptor interaction	K06237;K06237;K06237;K06237;K06237;K06237;K06237;K06237;K06237;K06237	GO:0005576//extracellular region;GO:0005587//collagen type IV trimer;GO:0005615//extracellular space;GO:0005788//endoplasmic reticulum lumen;GO:0031012//extracellular matrix;GO:0031594//neuromuscular junction	GO:0005201//extracellular matrix structural constituent;GO:0030020//extracellular matrix structural constituent conferring tensile strength	GO:0007528//neuromuscular junction development;GO:0030198//extracellular matrix organization;GO:0038063//collagen-activated tyrosine kinase receptor signaling pathway
1	BMSK0011976	4.53771	0.0245492	12	2303	0.417	0.001	-7.53014	9.43116e-11	1.51672e-06	down	SLC39A3	zinc transporter ZIP3 [Amyelois transitella]	-	-	-	-	GO:0005886//plasma membrane;GO:0016021//integral component of membrane	GO:0005385//zinc ion transmembrane transporter activity	GO:0071577//zinc II ion transmembrane transport
1	BMSK0006608	8.6765	1.42003	12	2303	0.75	0.056	-2.6112	1.01586e-10	1.6337e-06	down	-	10 kDa heat shock protein, mitochondrial	-	-	-	-	GO:0005759//mitochondrial matrix	GO:0005524//ATP binding	GO:0006457//protein folding
1	BMSK0007503	5.61602	0.24804	12	2303	0.583	0.012	-4.50091	1.08026e-10	1.73727e-06	down	LITAF	lipopolysaccharide-induced tumor necrosis factor-alpha factor homolog	Cellular Processes	Transport and catabolism	ko04142//Lysosome	K19363	GO:0000139//Golgi membrane;GO:0005634//nucleus;GO:0005765//lysosomal membrane;GO:0009898//cytoplasmic side of plasma membrane;GO:0098559//cytoplasmic side of early endosome membrane;GO:0098560//cytoplasmic side of late endosome membrane;GO:0098574//cytoplasmic side of lysosomal membrane	GO:0003677//DNA binding;GO:0005125//cytokine activity;GO:0008270//zinc ion binding	GO:0001816//cytokine production;GO:0019953//sexual reproduction
1	BMSK0015652	11.8592	0.198591	12	2303	0.583	0.012	-5.90007	2.26544e-10	3.64327e-06	down	Malrd1	scavenger receptor type C precursor	-	-	-	-	GO:0005737//cytoplasm;GO:0005794//Golgi apparatus;GO:0016021//integral component of membrane;GO:0030659//cytoplasmic vesicle membrane	-	GO:0042632//cholesterol homeostasis;GO:0070858//negative regulation of bile acid biosynthetic process
1	BMSK0012278	5.76286	0.681031	12	2303	0.667	0.032	-3.08099	2.39341e-10	3.84909e-06	down	Prosbeta3	ABF51431.1 proteasome beta 3 subunit	Genetic Information Processing	Folding, sorting and degradation	ko03050//Proteasome	K02735	GO:0000502//proteasome complex;GO:0005634//nucleus;GO:0005654//nucleoplasm;GO:0005737//cytoplasm;GO:0005829//cytosol;GO:0005839//proteasome core complex;GO:0019774//proteasome core complex, beta-subunit complex	GO:0004175//endopeptidase activity;GO:0004298//threonine-type endopeptidase activity	GO:0007623//circadian rhythm;GO:0008063//Toll signaling pathway;GO:0010498//proteasomal protein catabolic process;GO:0010499//proteasomal ubiquitin-independent protein catabolic process;GO:0043161//proteasome-mediated ubiquitin-dependent protein catabolic process
1	BMSK0015709	2.9769	0.0150519	12	2303	0.417	0.001	-7.62772	2.7245e-10	4.38153e-06	down	l(2)efl	heat shock protein hsp20.1	Genetic Information Processing;Organismal Systems	Folding, sorting and degradation;Aging	ko04141//Protein processing in endoplasmic reticulum;ko04213//Longevity regulating pathway - multiple species	K09542;K09542	GO:0030018//Z disc;GO:0048471//perinuclear region of cytoplasm	GO:0051082//unfolded protein binding	GO:0007275//multicellular organism development;GO:0009408//response to heat;GO:0010998//regulation of translational initiation by eIF2 alpha phosphorylation;GO:0042026//protein refolding;GO:0045214//sarcomere organization;GO:0061077//chaperone-mediated protein folding
1	BMSK0014867	8.05256	0.254301	12	2303	0.583	0.013	-4.98484	2.94465e-10	4.73559e-06	down	-	XP 004921838.1 uncharacterized protein LOC101745117	-	-	-	-	-	-	-
1	BMSK0000350	12.9928	3.27592	12	2303	0.917	0.126	-1.98774	3.23483e-10	5.20225e-06	down	-	Y-box protein	-	-	-	-	GO:0005634//nucleus	GO:0003723//RNA binding	-
1	BMSK0014264	9.31034	1.3025	12	2303	0.75	0.054	-2.83755	3.67542e-10	5.91081e-06	down	Hnrnpul1	heterogeneous nuclear ribonucleoprotein U-like protein 2 isoform X2 [Papilio xuthus]	Human Diseases	Infectious diseases	ko05164//Influenza A	K15047	GO:0005634//nucleus;GO:0005654//nucleoplasm	GO:0003723//RNA binding;GO:0019899//enzyme binding	GO:0006396//RNA processing;GO:0009615//response to virus
1	BMSK0004739	6.8513	0.3224	12	2303	0.583	0.015	-4.40945	6.42092e-10	1.03261e-05	down	-	peptidoglycan recognition protein precursor	Organismal Systems	Immune system	ko04624//Toll and Imd signaling pathway	K01446	-	GO:0008270//zinc ion binding;GO:0008745//N-acetylmuramoyl-L-alanine amidase activity;GO:0042834//peptidoglycan binding	GO:0009253//peptidoglycan catabolic process;GO:0045087//innate immune response
1	BMSK0015592	7.65819	0.446881	12	2303	0.583	0.017	-4.09904	6.77108e-10	1.08892e-05	down	l(2)efl	heat shock protein hsp 19.9	Genetic Information Processing;Organismal Systems	Folding, sorting and degradation;Aging	ko04141//Protein processing in endoplasmic reticulum;ko04213//Longevity regulating pathway - multiple species	K09542;K09542	GO:0030018//Z disc;GO:0048471//perinuclear region of cytoplasm	GO:0051082//unfolded protein binding	GO:0007275//multicellular organism development;GO:0009408//response to heat;GO:0010998//regulation of translational initiation by eIF2 alpha phosphorylation;GO:0042026//protein refolding;GO:0045214//sarcomere organization;GO:0061077//chaperone-mediated protein folding
1	BMSK0000297	6.05919	1.06901	12	2303	0.667	0.046	-2.50285	6.87062e-10	1.10493e-05	down	-	probable citrate synthase 2, mitochondrial	Metabolism;Metabolism;Metabolism;Metabolism;Metabolism;Metabolism	Global and overview maps;Global and overview maps;Global and overview maps;Carbohydrate metabolism;Carbohydrate metabolism;Global and overview maps	ko01100//Metabolic pathways;ko01200//Carbon metabolism;ko01230//Biosynthesis of amino acids;ko00020//Citrate cycle (TCA cycle);ko00630//Glyoxylate and dicarboxylate metabolism;ko01210//2-Oxocarboxylic acid metabolism	K01647;K01647;K01647;K01647;K01647;K01647	GO:0005759//mitochondrial matrix	GO:0004108//citrate (Si)-synthase activity	GO:0005975//carbohydrate metabolic process;GO:0006099//tricarboxylic acid cycle;GO:0006101//citrate metabolic process
1	BMSK0008321	5.85683	0.159783	12	2303	0.5	0.007	-5.19594	1.13765e-09	1.82957e-05	down	-	-	-	-	-	-	-	-	-
1	BMSK0011671	10.8135	2.68087	12	2303	0.833	0.104	-2.01206	1.14793e-09	1.8461e-05	down	FKBP1A	ABF51286.1 FK506-binding protein	-	-	-	-	GO:0005737//cytoplasm;GO:0005829//cytosol;GO:0016020//membrane;GO:0016529//sarcoplasmic reticulum;GO:0030018//Z disc;GO:0031312//extrinsic component of organelle membrane;GO:0033017//sarcoplasmic reticulum membrane;GO:0070062//extracellular exosome;GO:0098562//cytoplasmic side of membrane;GO:1990425//ryanodine receptor complex	GO:0003755//peptidyl-prolyl cis-trans isomerase activity;GO:0005528//FK506 binding;GO:0008144//drug binding;GO:0019855//calcium channel inhibitor activity;GO:0042803//protein homodimerization activity;GO:0044325//ion channel binding;GO:0046332//SMAD binding;GO:0048185//activin binding	GO:0000413//protein peptidyl-prolyl isomerization;GO:0001933//negative regulation of protein phosphorylation;GO:0003007//heart morphogenesis;GO:0006936//muscle contraction;GO:0007183//SMAD protein complex assembly;GO:0019221//cytokine-mediated signaling pathway;GO:0031000//response to caffeine;GO:0031398//positive regulation of protein ubiquitination;GO:0032092//positive regulation of protein bin…
1	BMSK0015965	4.39706	0.0347618	12	2303	0.417	0.002	-6.9829	1.28842e-09	2.07203e-05	down	Pick1	XP 004923470.1 PRKCA-binding protein isoform X5	-	-	-	-	GO:0005737//cytoplasm;GO:0005794//Golgi apparatus;GO:0005856//cytoskeleton;GO:0005886//plasma membrane;GO:0008021//synaptic vesicle;GO:0014069//postsynaptic density;GO:0030054//cell junction;GO:0030425//dendrite;GO:0032588//trans-Golgi network membrane;GO:0032991//macromolecular complex;GO:0042734//presynaptic membrane;GO:0043005//neuron projection;GO:0045202//synapse;GO:0045211//postsynaptic mem…	GO:0001664//G-protein coupled receptor binding;GO:0005080//protein kinase C binding;GO:0005102//receptor binding;GO:0005484//SNAP receptor activity;GO:0005543//phospholipid binding;GO:0008022//protein C-terminus binding;GO:0008092//cytoskeletal protein binding;GO:0019904//protein domain specific binding;GO:0030971//receptor tyrosine kinase binding;GO:0035255//ionotropic glutamate receptor binding…	GO:0002092//positive regulation of receptor internalization;GO:0006468//protein phosphorylation;GO:0006886//intracellular protein transport;GO:0007205//protein kinase C-activating G-protein coupled receptor signaling pathway;GO:0010629//negative regulation of gene expression;GO:0015844//monoamine transport;GO:0015872//dopamine transport;GO:0021782//glial cell development;GO:0034316//negative regu…
1	BMSK0002061	4.94535	0.215146	12	2303	0.5	0.009	-4.52269	1.30672e-09	2.10146e-05	down	Mfsd1	major facilitator superfamily domain-containing protein 1-like isoform X1 [Amyelois transitella]	-	-	-	-	GO:0016021//integral component of membrane	-	GO:0055085//transmembrane transport
1	BMSK0002248	7.14791	1.30677	12	2303	0.667	0.05	-2.45152	1.49596e-09	2.4058e-05	down	-	Sulfotransferase family	-	-	-	-	-	-	-
1	BMSK0007681	4.09817	0.894116	12	2303	0.583	0.034	-2.19645	1.70267e-09	2.73823e-05	down	Pomp	proteasome maturation protein	Genetic Information Processing	Folding, sorting and degradation	ko03050//Proteasome	K11599	GO:0005634//nucleus;GO:0005737//cytoplasm;GO:0005783//endoplasmic reticulum;GO:0005829//cytosol;GO:0016607//nuclear speck;GO:0031090//organelle membrane	-	GO:0043248//proteasome assembly
1	BMSK0002950	7.29843	0.859365	12	2303	0.667	0.037	-3.08624	1.95237e-09	3.1398e-05	down	PDIA3	protein disulfide-isomerase like protein ERp57 precursor	Genetic Information Processing;Human Diseases;Organismal Systems	Folding, sorting and degradation;Infectious diseases;Immune system	ko04141//Protein processing in endoplasmic reticulum;ko05163//Human cytomegalovirus infection;ko04612//Antigen processing and presentation	K08056;K08056;K08056	GO:0005615//extracellular space;GO:0005783//endoplasmic reticulum;GO:0005788//endoplasmic reticulum lumen;GO:0009986//cell surface;GO:0042470//melanosome;GO:0042824//MHC class I peptide loading complex	GO:0003756//protein disulfide isomerase activity;GO:0015037//peptide disulfide oxidoreductase activity;GO:0042802//identical protein binding	GO:0006457//protein folding;GO:0034976//response to endoplasmic reticulum stress;GO:0045454//cell redox homeostasis;GO:0098761//cellular response to interleukin-7;GO:2001238//positive regulation of extrinsic apoptotic signaling pathway
1	BMSK0009485	6.76864	0.459988	12	2303	0.583	0.021	-3.8792	2.04412e-09	3.28735e-05	down	AIFM3	apoptosis-inducing factor 3 isoform X1	-	-	-	-	GO:0005739//mitochondrion;GO:0005743//mitochondrial inner membrane;GO:0005783//endoplasmic reticulum;GO:0005829//cytosol	GO:0016491//oxidoreductase activity;GO:0046872//metal ion binding;GO:0050660//flavin adenine dinucleotide binding;GO:0051537//2 iron, 2 sulfur cluster binding	GO:0097194//execution phase of apoptosis
1	BMSK0001975	3.68193	0.0415823	12	2303	0.417	0.003	-6.46835	2.25018e-09	3.61874e-05	down	-	uncharacterized protein LOC105841846	-	-	-	-	-	-	-
1	BMSK0004546	11.5201	0.455643	12	2303	0.583	0.017	-4.6601	2.32193e-09	3.73412e-05	down	-	Interferon-induced 6-16 family	-	-	-	-	-	-	-
1	BMSK0012697	6.01242	1.3974	12	2303	0.667	0.056	-2.1052	3.06302e-09	4.92594e-05	down	SRRM1	serine/arginine repetitive matrix protein 1 isoform X4	Genetic Information Processing;Genetic Information Processing	Translation;Translation	ko03013//RNA transport;ko03015//mRNA surveillance pathway	K13171;K13171	GO:0005634//nucleus;GO:0005654//nucleoplasm;GO:0005829//cytosol;GO:0016363//nuclear matrix;GO:0016607//nuclear speck;GO:0071013//catalytic step 2 spliceosome	GO:0003677//DNA binding;GO:0003723//RNA binding	GO:0000375//RNA splicing, via transesterification reactions;GO:0000398//mRNA splicing, via spliceosome;GO:0006405//RNA export from nucleus;GO:0006406//mRNA export from nucleus;GO:0008380//RNA splicing;GO:0031124//mRNA 3'-end processing
1	BMSK0014079	8.01002	0.947436	12	2303	0.667	0.042	-3.07971	3.14048e-09	5.05052e-05	down	stk10	serine/threonine-protein kinase 10 [Papilio xuthus]	Cellular Processes	Cell growth and death	ko04114//Oocyte meiosis	K08836	GO:0005737//cytoplasm;GO:0005886//plasma membrane	GO:0004674//protein serine/threonine kinase activity;GO:0005524//ATP binding;GO:0042803//protein homodimerization activity	GO:0007049//cell cycle;GO:0023014//signal transduction by protein phosphorylation;GO:0031098//stress-activated protein kinase signaling cascade;GO:0032147//activation of protein kinase activity;GO:0046777//protein autophosphorylation;GO:2000401//regulation of lymphocyte migration
1	BMSK0003117	16.6408	2.11652	12	2303	0.833	0.087	-2.97495	3.25609e-09	5.23644e-05	down	sqd	squid protein homologue isoform X1	Organismal Systems	Development	ko04320//Dorso-ventral axis formation	K03102	GO:0000785//chromatin;GO:0005634//nucleus;GO:0005654//nucleoplasm;GO:0005703//polytene chromosome puff;GO:0005737//cytoplasm;GO:0035062//omega speckle;GO:0071011//precatalytic spliceosome;GO:0071013//catalytic step 2 spliceosome;GO:1990904//ribonucleoprotein complex	GO:0003680//AT DNA binding;GO:0003723//RNA binding;GO:0003729//mRNA binding;GO:0003730//mRNA 3'-UTR binding;GO:0035925//mRNA 3'-UTR AU-rich region binding;GO:0043565//sequence-specific DNA binding;GO:1990837//sequence-specific double-stranded DNA binding	GO:0000184//nuclear-transcribed mRNA catabolic process, nonsense-mediated decay;GO:0000381//regulation of alternative mRNA splicing, via spliceosome;GO:0000398//mRNA splicing, via spliceosome;GO:0006405//RNA export from nucleus;GO:0006406//mRNA export from nucleus;GO:0007293//germarium-derived egg chamber formation;GO:0007297//ovarian follicle cell migration;GO:0007314//oocyte anterior/posterior …
1	BMSK0003908	56.0964	1.32484	12	2303	0.667	0.057	-5.40401	3.52523e-09	5.66927e-05	down	-	hemocyte protease-1	-	-	-	-	GO:0005576//extracellular region;GO:0030133//transport vesicle	GO:0004252//serine-type endopeptidase activity;GO:0046872//metal ion binding	GO:0042381//hemolymph coagulation
1	BMSK0001916	6.30116	0.575847	12	2303	0.583	0.023	-3.45186	3.74407e-09	6.02122e-05	down	SLC9B2	mitochondrial sodium/hydrogen exchanger 9B2 isoform X1	-	-	-	-	GO:0005743//mitochondrial inner membrane;GO:0005886//plasma membrane;GO:0010008//endosome membrane;GO:0016021//integral component of membrane;GO:0016323//basolateral plasma membrane;GO:0016324//apical plasma membrane;GO:0030054//cell junction;GO:0030672//synaptic vesicle membrane;GO:0031966//mitochondrial membrane;GO:0097228//sperm principal piece	GO:0005451//monovalent cation:proton antiporter activity;GO:0010348//lithium:proton antiporter activity;GO:0015385//sodium:proton antiporter activity;GO:0042802//identical protein binding	GO:0006814//sodium ion transport;GO:0030317//sperm motility;GO:0034220//ion transmembrane transport;GO:0061178//regulation of insulin secretion involved in cellular response to glucose stimulus;GO:0072583//clathrin-mediated endocytosis;GO:2001206//positive regulation of osteoclast development
1	BMSK0014899	8.72302	0.0779825	12	2303	0.417	0.003	-6.80553	4.18095e-09	6.7238e-05	down	Ppn	papilin	-	-	-	-	GO:0005604//basement membrane	GO:0004867//serine-type endopeptidase inhibitor activity;GO:0005201//extracellular matrix structural constituent;GO:0008233//peptidase activity	GO:0007275//multicellular organism development;GO:0030198//extracellular matrix organization
1	BMSK0006467	7.99978	1.07778	12	2303	0.667	0.047	-2.8919	4.80224e-09	7.72296e-05	down	Leng8	leukocyte receptor cluster member 8 homolog [Amyelois transitella]	-	-	-	-	GO:0005634//nucleus	-	-
1	BMSK0014420	15.1773	1.43787	12	2303	0.75	0.057	-3.3999	4.94423e-09	7.95131e-05	down	-	double-stranded R -specific editase 1 isoform X2	-	-	-	-	-	-	-
1	BMSK0007870	6.79729	0.554655	12	2303	0.583	0.023	-3.6153	5.07239e-09	8.15741e-05	down	pgant6	polypeptide N-acetylgalactosaminyltransferase 10	Metabolism;Metabolism	Global and overview maps;Glycan biosynthesis and metabolism	ko01100//Metabolic pathways;ko00512//Mucin type O-glycan biosynthesis	K00710;K00710	GO:0000139//Golgi membrane;GO:0005783//endoplasmic reticulum;GO:0005794//Golgi apparatus;GO:0005795//Golgi stack;GO:0016021//integral component of membrane	GO:0004653//polypeptide N-acetylgalactosaminyltransferase activity;GO:0030246//carbohydrate binding;GO:0046872//metal ion binding	GO:0006486//protein glycosylation;GO:0009312//oligosaccharide biosynthetic process
1	BMSK0011139	6.09176	0.254098	12	2303	0.5	0.011	-4.58341	7.14905e-09	0.000114971	down	PPIB	ABF51475.1 peptidylprolyl isomerase B	-	-	-	-	GO:0005788//endoplasmic reticulum lumen;GO:0032991//macromolecular complex;GO:0042470//melanosome	GO:0003755//peptidyl-prolyl cis-trans isomerase activity;GO:0016018//cyclosporin A binding;GO:0051082//unfolded protein binding	GO:0000413//protein peptidyl-prolyl isomerization;GO:0042026//protein refolding;GO:0061077//chaperone-mediated protein folding;GO:1904027//negative regulation of collagen fibril organization
1	BMSK0004810	11.9142	2.88233	12	2303	0.833	0.112	-2.04737	7.50646e-09	0.000120719	down	tent5c	protein FAM46C isoform X2	-	-	-	-	GO:0005634//nucleus;GO:0005737//cytoplasm	GO:0003723//RNA binding;GO:1990817//RNA adenylyltransferase activity	GO:0048255//mRNA stabilization
1	BMSK0014056	15.0715	2.33428	12	2303	0.833	0.094	-2.69077	8.45593e-09	0.000135988	down	FERH	ABF51285.1 ferritin	Cellular Processes;Organismal Systems;Cellular Processes	Cell growth and death;Digestive system;Cell growth and death	ko04217//Necroptosis;ko04978//Mineral absorption;ko04216//Ferroptosis	K00522;K00522;K00522	GO:0005576//extracellular region;GO:0005623//cell	GO:0004322//ferroxidase activity;GO:0008199//ferric iron binding	GO:0006826//iron ion transport;GO:0006879//cellular iron ion homeostasis
1	BMSK0006107	4.39976	0.378103	12	2303	0.5	0.014	-3.54057	1.03012e-08	0.000165664	down	snk	uncharacterized protein LOC105841272	-	-	-	-	GO:0005576//extracellular region	GO:0004252//serine-type endopeptidase activity	GO:0006508//proteolysis;GO:0008063//Toll signaling pathway;GO:0009950//dorsal/ventral axis specification;GO:0031638//zymogen activation;GO:0045752//positive regulation of Toll signaling pathway
1	BMSK0013506	2.45505	0.135196	12	2303	0.417	0.005	-4.18263	1.14476e-08	0.0001841	down	-	XP 004930824.1 uncharacterized protein LOC101736947	-	-	-	-	-	-	-
1	BMSK0000577	10.3411	0.25567	12	2303	0.5	0.011	-5.33797	1.17202e-08	0.000188484	down	-	uncharacterized protein LOC101735714	-	-	-	-	-	-	-
1	BMSK0000195	8.15704	0.301612	12	2303	0.5	0.012	-4.75728	1.40556e-08	0.000226042	down	Fkbp14	FK506-binding protein precursor	-	-	-	-	GO:0005788//endoplasmic reticulum lumen	GO:0003755//peptidyl-prolyl cis-trans isomerase activity;GO:0005509//calcium ion binding	-
1	BMSK0001329	6.17468	0.0611449	12	2303	0.417	0.004	-6.65799	1.7132e-08	0.000275517	down	Swip-1	EF-hand domain-containing protein D2 homolog [Amyelois transitella]	-	-	-	-	GO:0005886//plasma membrane;GO:0005927//muscle tendon junction	GO:0005509//calcium ion binding	GO:0007498//mesoderm development
1	BMSK0005893	3.21724	0.116942	12	2303	0.417	0.005	-4.78196	1.94135e-08	0.000312207	down	-	protein toll-like [Amyelois transitella]	Organismal Systems	Immune system	ko04624//Toll and Imd signaling pathway	K18809	-	-	-
1	BMSK0005431	2.52759	0.165534	12	2303	0.417	0.007	-3.93256	2.02732e-08	0.000326034	down	Ptprn2	receptor-type tyrosine-protein phosphatase N2 isoform X2	Human Diseases	Endocrine and metabolic diseases	ko04940//Type I diabetes mellitus	K07817	GO:0005737//cytoplasm;GO:0005788//endoplasmic reticulum lumen;GO:0030054//cell junction;GO:0030141//secretory granule;GO:0030285//integral component of synaptic vesicle membrane;GO:0030667//secretory granule membrane;GO:0030672//synaptic vesicle membrane;GO:0043195//terminal bouton;GO:0043235//receptor complex	GO:0004725//protein tyrosine phosphatase activity	GO:0006629//lipid metabolic process;GO:0007269//neurotransmitter secretion;GO:0034260//negative regulation of GTPase activity;GO:0035773//insulin secretion involved in cellular response to glucose stimulus
1	BMSK0006736	3.8348	0.465367	12	2303	0.5	0.02	-3.04271	2.085e-08	0.00033531	down	E(z)	histone-lysine N-methyltransferase E(z)	Human Diseases;Metabolism	Cancers;Amino acid metabolism	ko05206//MicroRNAs in cancer;ko00310//Lysine degradation	K11430;K11430	GO:0000790//nuclear chromatin;GO:0005634//nucleus;GO:0035097//histone methyltransferase complex;GO:0035098//ESC/E(Z) complex	GO:0003677//DNA binding;GO:0003700//transcription factor activity, sequence-specific DNA binding;GO:0042054//histone methyltransferase activity;GO:0043565//sequence-specific DNA binding;GO:0046974//histone methyltransferase activity (H3-K9 specific);GO:0046976//histone methyltransferase activity (H3-K27 specific)	GO:0006723//cuticle hydrocarbon biosynthetic process;GO:0007411//axon guidance;GO:0016458//gene silencing;GO:0016571//histone methylation;GO:0022008//neurogenesis;GO:0031062//positive regulation of histone methylation;GO:0035186//syncytial blastoderm mitotic cell cycle;GO:0045892//negative regulation of transcription, DNA-templated;GO:0051567//histone H3-K9 methylation;GO:0070734//histone H3-K27 …
1	BMSK0012226	3.13994	0.0132451	12	2303	0.333	0.001	-7.88913	2.09881e-08	0.00033753	down	-	XP 012548782.2 uncharacterized protein LOC101743414	-	-	-	-	-	-	-
1	BMSK0004675	5.01108	0.417278	12	2303	0.5	0.016	-3.58604	2.10012e-08	0.000337742	down	ND-ACP	DH dehydrogenase isoform 2	Metabolism;Organismal Systems;Human Diseases;Human Diseases;Human Diseases;Metabolism;Human Diseases;Organismal Systems	Global and overview maps;Environmental adaptation;Neurodegenerative diseases;Neurodegenerative diseases;Neurodegenerative diseases;Energy metabolism;Endocrine and metabolic diseases;Nervous system	ko01100//Metabolic pathways;ko04714//Thermogenesis;ko05016//Huntington disease;ko05010//Alzheimer disease;ko05012//Parkinson disease;ko00190//Oxidative phosphorylation;ko04932//Non-alcoholic fatty liver disease (NAFLD);ko04723//Retrograde endocannabinoid signaling	K03955;K03955;K03955;K03955;K03955;K03955;K03955;K03955	GO:0005739//mitochondrion;GO:0005747//mitochondrial respiratory chain complex I	GO:0000035//acyl binding;GO:0000036//ACP phosphopantetheine attachment site binding involved in fatty acid biosynthetic process;GO:0031177//phosphopantetheine binding	GO:0006120//mitochondrial electron transport, NADH to ubiquinone;GO:0006633//fatty acid biosynthetic process
1	BMSK0013362	4.51993	1.05142	12	2303	0.583	0.048	-2.10396	2.55478e-08	0.00041086	down	slc16a12	monocarboxylate transporter 4 isoform X2	-	-	-	-	GO:0005887//integral component of plasma membrane	GO:0005308//creatine transmembrane transporter activity;GO:0008028//monocarboxylic acid transmembrane transporter activity;GO:0015293//symporter activity	GO:0015718//monocarboxylic acid transport;GO:0015881//creatine transport
1	BMSK0014271	4.63479	1.76167	12	2303	0.583	0.073	-1.39556	2.57292e-08	0.000413778	down	Vps26	vacuolar protein sorting-associated protein 26B-like [Amyelois transitella]	Cellular Processes	Transport and catabolism	ko04144//Endocytosis	K18466	GO:0005768//endosome;GO:0005829//cytosol;GO:0030904//retromer complex;GO:0030906//retromer, cargo-selective complex	GO:0008565//protein transporter activity	GO:0006886//intracellular protein transport;GO:0016055//Wnt signaling pathway;GO:0030111//regulation of Wnt signaling pathway;GO:0042147//retrograde transport, endosome to Golgi
1	BMSK0014645	3.01988	0.315906	12	2303	0.5	0.018	-3.25693	2.92129e-08	0.000469801	down	Sec13	Protein transport protein sec13 [Operophtera brumata]	Genetic Information Processing;Genetic Information Processing;Environmental Information Processing	Folding, sorting and degradation;Translation;Signal transduction	ko04141//Protein processing in endoplasmic reticulum;ko03013//RNA transport;ko04150//mTOR signaling pathway	K14004;K14004;K14004	GO:0000139//Golgi membrane;GO:0000785//chromatin;GO:0005654//nucleoplasm;GO:0005703//polytene chromosome puff;GO:0005765//lysosomal membrane;GO:0005789//endoplasmic reticulum membrane;GO:0005815//microtubule organizing center;GO:0005829//cytosol;GO:0030127//COPII vesicle coat;GO:0031080//nuclear pore outer ring;GO:0035859//Seh1-associated complex;GO:0061700//GATOR2 complex	GO:0003682//chromatin binding;GO:0005198//structural molecule activity	GO:0006606//protein import into nucleus;GO:0008363//larval chitin-based cuticle development;GO:0010629//negative regulation of gene expression;GO:0034605//cellular response to heat;GO:0035077//ecdysone-mediated polytene chromosome puffing;GO:0035293//chitin-based larval cuticle pattern formation;GO:0045944//positive regulation of transcription from RNA polymerase II promoter;GO:0051028//mRNA tran…
1	BMSK0002446	4.82797	0.285482	12	2303	0.5	0.014	-4.07995	3.01046e-08	0.000484142	down	-	dolichyl-diphosphooligosaccharide--protein glycosyltransferase subunit 2 [Plutella xylostella]	Metabolism;Genetic Information Processing;Metabolism	Global and overview maps;Folding, sorting and degradation;Glycan biosynthesis and metabolism	ko01100//Metabolic pathways;ko04141//Protein processing in endoplasmic reticulum;ko00510//N-Glycan biosynthesis	K12667;K12667;K12667	-	-	-
1	BMSK0001223	6.13117	1.58131	12	2303	0.667	0.073	-1.95505	3.19671e-08	0.000514094	down	PPP2CB	serine/threonine-protein phosphatase 2A catalytic subunit beta isoform isoform X1 [Papilio polytes]	Human Diseases;Environmental Information Processing;Environmental Information Processing;Cellular Processes;Environmental Information Processing;Cellular Processes;Cellular Processes;Organismal Systems;Environmental Information Processing;Genetic Information Processing;Organismal Systems;Environmental Information Processing;Environmental Information Processing;Human Diseases;Human Diseases;Enviro…	Infectious diseases;Signal transduction;Signal transduction;Transport and catabolism;Signal transduction;Cellular community - eukaryotes;Cell growth and death;Circulatory system;Signal transduction;Translation;Nervous system;Signal transduction;Signal transduction;Infectious diseases;Infectious diseases;Signal transduction;Nervous system;Transport and catabolism	ko05165//Human papillomavirus infection;ko04151//PI3K-Akt signaling pathway;ko04013//MAPK signaling pathway - fly;ko04140//Autophagy - animal;ko04152//AMPK signaling pathway;ko04530//Tight junction;ko04114//Oocyte meiosis;ko04261//Adrenergic signaling in cardiomyocytes;ko04390//Hippo signaling pathway;ko03015//mRNA surveillance pathway;ko04728//Dopaminergic synapse;ko04391//Hippo signaling pathwa…	K04382;K04382;K04382;K04382;K04382;K04382;K04382;K04382;K04382;K04382;K04382;K04382;K04382;K04382;K04382;K04382;K04382;K04382	GO:0000159//protein phosphatase type 2A complex;GO:0000775//chromosome, centromeric region;GO:0000922//spindle pole;GO:0005634//nucleus;GO:0005829//cytosol	GO:0004722//protein serine/threonine phosphatase activity;GO:0008022//protein C-terminus binding;GO:0046872//metal ion binding;GO:0048156//tau protein binding	GO:0006470//protein dephosphorylation;GO:0008637//apoptotic mitochondrial changes;GO:0010288//response to lead ion;GO:0010468//regulation of gene expression;GO:0034976//response to endoplasmic reticulum stress;GO:0035970//peptidyl-threonine dephosphorylation;GO:0042542//response to hydrogen peroxide;GO:0043161//proteasome-mediated ubiquitin-dependent protein catabolic process;GO:0046580//negative…
1	BMSK0012509	13.6799	1.17675	12	2303	0.667	0.045	-3.53917	3.32136e-08	0.00053414	down	crt	calreticulin	Genetic Information Processing;Human Diseases;Human Diseases;Cellular Processes;Human Diseases;Organismal Systems	Folding, sorting and degradation;Infectious diseases;Infectious diseases;Transport and catabolism;Infectious diseases;Immune system	ko04141//Protein processing in endoplasmic reticulum;ko05166//HTLV-I infection;ko05163//Human cytomegalovirus infection;ko04145//Phagosome;ko05142//Chagas disease (American trypanosomiasis);ko04612//Antigen processing and presentation	K08057;K08057;K08057;K08057;K08057;K08057	GO:0005788//endoplasmic reticulum lumen	GO:0005509//calcium ion binding;GO:0030246//carbohydrate binding;GO:0051082//unfolded protein binding	GO:0006457//protein folding
1	BMSK0002939	5.89288	2.19887	12	2303	0.667	0.093	-1.42221	3.63137e-08	0.000583997	down	PTP4A1	protein tyrosine phosphatase type IVA 1	-	-	-	-	GO:0005634//nucleus;GO:0005737//cytoplasm;GO:0005769//early endosome;GO:0005783//endoplasmic reticulum;GO:0005819//spindle;GO:0009898//cytoplasmic side of plasma membrane	GO:0004725//protein tyrosine phosphatase activity;GO:0008138//protein tyrosine/serine/threonine phosphatase activity	GO:0007049//cell cycle;GO:0007275//multicellular organism development;GO:0030335//positive regulation of cell migration
1	BMSK0012200	6.48329	1.00845	12	2303	0.583	0.04	-2.68459	3.90807e-08	0.000628496	down	ubq-1	Ubiquitin family	Organismal Systems	Endocrine system	ko03320//PPAR signaling pathway	K08770	GO:0005634//nucleus;GO:0005737//cytoplasm	GO:0031386//protein tag;GO:0031625//ubiquitin protein ligase binding	GO:0016567//protein ubiquitination;GO:0019941//modification-dependent protein catabolic process
1	BMSK0007707	3.09104	0.233912	12	2303	0.417	0.008	-3.72406	5.15629e-08	0.000829235	down	pain	transient receptor potential cation channel protein painless	-	-	-	-	GO:0005886//plasma membrane;GO:0016021//integral component of membrane;GO:0034704//calcium channel complex	GO:0005216//ion channel activity;GO:0005227//calcium activated cation channel activity;GO:0005262//calcium channel activity	GO:0006816//calcium ion transport;GO:0007620//copulation;GO:0007631//feeding behavior;GO:0007638//mechanosensory behavior;GO:0008016//regulation of heart contraction;GO:0008049//male courtship behavior;GO:0009408//response to heat;GO:0009612//response to mechanical stimulus;GO:0019233//sensory perception of pain;GO:0035179//larval turning behavior;GO:0042048//olfactory behavior;GO:0045924//regula…
1	BMSK0015289	6.42189	1.27359	12	2303	0.583	0.05	-2.33409	5.23143e-08	0.000841318	down	slc25a28	mitoferrin-1-like [Plutella xylostella]	-	-	-	-	GO:0005743//mitochondrial inner membrane;GO:0016021//integral component of membrane	GO:0005381//iron ion transmembrane transporter activity	GO:0048250//mitochondrial iron ion transport;GO:0055072//iron ion homeostasis
1	BMSK0004115	6.62066	0.789656	12	2303	0.583	0.034	-3.06768	6.23824e-08	0.00100323	down	-	uncharacterized protein LOC105386396 [Plutella xylostella]	-	-	-	-	-	-	-
1	BMSK0007167	5.85958	0.427005	12	2303	0.5	0.017	-3.77847	6.24652e-08	0.00100457	down	-	vegetative cell wall protein gp1	-	-	-	-	-	-	-
1	BMSK0006570	13.2665	4.95144	12	2303	0.917	0.211	-1.42187	6.40523e-08	0.00103009	down	Rm62	DEAD box polypeptide 5 isoform 1	Genetic Information Processing;Human Diseases;Human Diseases	Transcription;Cancers;Cancers	ko03040//Spliceosome;ko05205//Proteoglycans in cancer;ko05202//Transcriptional misregulation in cancers	K12823;K12823;K12823	GO:0005634//nucleus;GO:0005700//polytene chromosome;GO:0005703//polytene chromosome puff;GO:0005730//nucleolus;GO:0005737//cytoplasm;GO:0005829//cytosol;GO:0071011//precatalytic spliceosome;GO:0071013//catalytic step 2 spliceosome	GO:0003729//mRNA binding;GO:0004386//helicase activity;GO:0005524//ATP binding	GO:0000381//regulation of alternative mRNA splicing, via spliceosome;GO:0000398//mRNA splicing, via spliceosome;GO:0006417//regulation of translation;GO:0016246//RNA interference;GO:0019730//antimicrobial humoral response;GO:0050688//regulation of defense response to virus;GO:0051607//defense response to virus
1	BMSK0002191	4.90191	0.502004	12	2303	0.5	0.022	-3.28757	7.26321e-08	0.00116807	down	Prosalpha4	proteasome beta-subunit	Genetic Information Processing	Folding, sorting and degradation	ko03050//Proteasome	K02731	GO:0000502//proteasome complex;GO:0005634//nucleus;GO:0005654//nucleoplasm;GO:0005737//cytoplasm;GO:0005829//cytosol;GO:0005839//proteasome core complex;GO:0019773//proteasome core complex, alpha-subunit complex	GO:0004175//endopeptidase activity;GO:0004298//threonine-type endopeptidase activity	GO:0007623//circadian rhythm;GO:0008063//Toll signaling pathway;GO:0010498//proteasomal protein catabolic process;GO:0010499//proteasomal ubiquitin-independent protein catabolic process;GO:0043161//proteasome-mediated ubiquitin-dependent protein catabolic process
1	BMSK0014308	4.94582	0.56376	12	2303	0.5	0.021	-3.13306	7.40978e-08	0.00119164	down	TAF10	Transcription initiation factor TFIID subunit 10 [Operophtera brumata]	Human Diseases;Genetic Information Processing	Infectious diseases;Transcription	ko05168//Herpes simplex infection;ko03022//Basal transcription factors	K03134;K03134	GO:0000125//PCAF complex;GO:0005634//nucleus;GO:0005654//nucleoplasm;GO:0005669//transcription factor TFIID complex;GO:0005737//cytoplasm;GO:0030914//STAGA complex;GO:0033276//transcription factor TFTC complex;GO:0048471//perinuclear region of cytoplasm	GO:0003677//DNA binding;GO:0019899//enzyme binding;GO:0030331//estrogen receptor binding;GO:0070063//RNA polymerase binding	GO:0000082//G1/S transition of mitotic cell cycle;GO:0006352//DNA-templated transcription, initiation;GO:0006366//transcription from RNA polymerase II promoter;GO:0006367//transcription initiation from RNA polymerase II promoter;GO:0006915//apoptotic process;GO:0010468//regulation of gene expression;GO:0016578//histone deubiquitination;GO:0016579//protein deubiquitination;GO:0034622//cellular mac…
1	BMSK0003306	7.93138	1.74242	12	2303	0.583	0.062	-2.18648	7.95308e-08	0.00127901	down	HNRNP	heterogeneous nuclear ribonucleoprotein A1	Genetic Information Processing	Transcription	ko03040//Spliceosome	K12741	GO:0005634//nucleus	GO:0003723//RNA binding	-
1	BMSK0002852	3.33759	0.229853	12	2303	0.417	0.009	-3.86002	8.38044e-08	0.00134774	down	InR	insulin-like receptor	Human Diseases;Environmental Information Processing;Environmental Information Processing;Environmental Information Processing;Organismal Systems;Environmental Information Processing;Organismal Systems;Environmental Information Processing;Environmental Information Processing;Environmental Information Processing;Organismal Systems;Environmental Information Processing;Human Diseases;Environmental In…	Endocrine and metabolic diseases;Signal transduction;Signal transduction;Signal transduction;Endocrine system;Signal transduction;Aging;Signal transduction;Signal transduction;Signal transduction;Aging;Signal transduction;Endocrine and metabolic diseases;Signal transduction;Aging;Signal transduction;Cellular community - eukaryotes;Endocrine system;Endocrine system;Endocrine and metabolic diseases…	ko04932//Non-alcoholic fatty liver disease (NAFLD);ko04151//PI3K-Akt signaling pathway;ko04010//MAPK signaling pathway;ko04014//Ras signaling pathway;ko04910//Insulin signaling pathway;ko04015//Rap1 signaling pathway;ko04212//Longevity regulating pathway - worm;ko04150//mTOR signaling pathway;ko04152//AMPK signaling pathway;ko04022//cGMP - PKG signaling pathway;ko04213//Longevity regulating pathw…	K04527;K04527;K04527;K04527;K04527;K04527;K04527;K04527;K04527;K04527;K04527;K04527;K04527;K04527;K04527;K04527;K04527;K04527;K04527;K04527;K04527	GO:0005887//integral component of plasma membrane	GO:0005009//insulin-activated receptor activity;GO:0005524//ATP binding;GO:0043548//phosphatidylinositol 3-kinase binding;GO:0043559//insulin binding;GO:0043560//insulin receptor substrate binding;GO:0046872//metal ion binding	GO:0008286//insulin receptor signaling pathway;GO:0046777//protein autophosphorylation;GO:0051290//protein heterotetramerization;GO:0071469//cellular response to alkaline pH
1	BMSK0008116	3.09352	0.0514184	12	2303	0.333	0.002	-5.91082	8.88398e-08	0.00142872	down	GALM	aldose 1-epimerase	Metabolism;Metabolism;Metabolism	Global and overview maps;Carbohydrate metabolism;Carbohydrate metabolism	ko01100//Metabolic pathways;ko00010//Glycolysis / Gluconeogenesis;ko00052//Galactose metabolism	K01785;K01785;K01785	GO:0005737//cytoplasm	GO:0004034//aldose 1-epimerase activity;GO:0030246//carbohydrate binding	GO:0006006//glucose metabolic process;GO:0033499//galactose catabolic process via UDP-galactose
1	BMSK0015917	4.06122	0.0476787	12	2303	0.333	0.002	-6.41242	1.0121e-07	0.00162766	down	-	uncharacterized protein LOC105386011 [Plutella xylostella]	-	-	-	-	-	-	-
1	BMSK0003485	11.0782	0.279802	12	2303	0.5	0.016	-5.30717	1.0498e-07	0.0016883	down	-	lopap [Papilio machaon]	-	-	-	-	-	-	-
1	BMSK0007896	2.41472	0.197322	12	2303	0.417	0.009	-3.61323	1.06001e-07	0.00170471	down	Ptp10D	tyrosine-protein phosphatase 10D	Cellular Processes	Cellular community - eukaryotes	ko04520//Adherens junction	K05694	GO:0016021//integral component of membrane;GO:0030424//axon;GO:0045177//apical part of cell	GO:0005001//transmembrane receptor protein tyrosine phosphatase activity	GO:0006470//protein dephosphorylation;GO:0007411//axon guidance;GO:0007417//central nervous system development;GO:0007424//open tracheal system development;GO:0007616//long-term memory;GO:0008045//motor neuron axon guidance;GO:0042059//negative regulation of epidermal growth factor receptor signaling pathway;GO:0060446//branching involved in open tracheal system development
1	BMSK0013463	2.68969	0.238912	12	2303	0.417	0.01	-3.49289	1.08147e-07	0.00173921	down	-	uncharacterized protein LOC101746156	Metabolism;Organismal Systems;Human Diseases;Human Diseases;Human Diseases;Metabolism;Human Diseases;Organismal Systems	Global and overview maps;Environmental adaptation;Neurodegenerative diseases;Neurodegenerative diseases;Neurodegenerative diseases;Energy metabolism;Endocrine and metabolic diseases;Nervous system	ko01100//Metabolic pathways;ko04714//Thermogenesis;ko05016//Huntington disease;ko05010//Alzheimer disease;ko05012//Parkinson disease;ko00190//Oxidative phosphorylation;ko04932//Non-alcoholic fatty liver disease (NAFLD);ko04723//Retrograde endocannabinoid signaling	K03960;K03960;K03960;K03960;K03960;K03960;K03960;K03960	-	-	-
1	BMSK0002676	9.86222	1.44877	12	2303	0.667	0.062	-2.76709	1.09328e-07	0.00175821	down	RAP2C	ras-related protein 2	Cellular Processes	Cellular community - eukaryotes	ko04530//Tight junction	K07839	GO:0005829//cytosol;GO:0005886//plasma membrane;GO:0005923//bicellular tight junction;GO:0044291//cell-cell contact zone;GO:0055038//recycling endosome membrane	GO:0003713//transcription coactivator activity;GO:0003924//GTPase activity;GO:0005525//GTP binding;GO:0019003//GDP binding	GO:0030336//negative regulation of cell migration;GO:0031954//positive regulation of protein autophosphorylation;GO:0032486//Rap protein signal transduction;GO:0061097//regulation of protein tyrosine kinase activity;GO:0090557//establishment of endothelial intestinal barrier
1	BMSK0006301	5.87543	0.138138	12	2303	0.417	0.007	-5.41051	1.11688e-07	0.00179617	down	gnbp1	beta-1,3-glucan recognition protein 2 precursor	Organismal Systems	Immune system	ko04624//Toll and Imd signaling pathway	K20697	GO:0005576//extracellular region	GO:0004553//hydrolase activity, hydrolyzing O-glycosyl compounds;GO:0030246//carbohydrate binding	GO:0005975//carbohydrate metabolic process;GO:0042742//defense response to bacterium;GO:0045087//innate immune response;GO:0045088//regulation of innate immune response
1	BMSK0009255	5.35227	0.462092	12	2303	0.5	0.02	-3.5339	1.14152e-07	0.00183579	down	Ald	fructose 1,6-bisphosphate aldolase	Metabolism;Metabolism;Metabolism;Environmental Information Processing;Metabolism;Metabolism;Metabolism	Global and overview maps;Global and overview maps;Global and overview maps;Signal transduction;Carbohydrate metabolism;Carbohydrate metabolism;Carbohydrate metabolism	ko01100//Metabolic pathways;ko01200//Carbon metabolism;ko01230//Biosynthesis of amino acids;ko04066//HIF-1 signaling pathway;ko00010//Glycolysis / Gluconeogenesis;ko00051//Fructose and mannose metabolism;ko00030//Pentose phosphate pathway	K01623;K01623;K01623;K01623;K01623;K01623;K01623	GO:0005829//cytosol;GO:0030018//Z disc;GO:0031430//M band	GO:0004332//fructose-bisphosphate aldolase activity	GO:0006096//glycolytic process;GO:0007498//mesoderm development;GO:0042593//glucose homeostasis
1	BMSK0006391	2.05775	0.267362	12	2303	0.417	0.012	-2.9442	1.24699e-07	0.00200541	down	Atxn1	ataxin-1-like	-	-	-	-	GO:0005634//nucleus;GO:0005654//nucleoplasm;GO:0005730//nucleolus;GO:0005737//cytoplasm;GO:0005829//cytosol;GO:0016363//nuclear matrix;GO:0032991//macromolecular complex;GO:0042405//nuclear inclusion body;GO:0098794//postsynapse	GO:0003677//DNA binding;GO:0003682//chromatin binding;GO:0003723//RNA binding;GO:0008022//protein C-terminus binding;GO:0008266//poly(U) RNA binding;GO:0034046//poly(G) binding;GO:0042802//identical protein binding;GO:0043621//protein self-association	GO:0000122//negative regulation of transcription from RNA polymerase II promoter;GO:0007420//brain development;GO:0007612//learning;GO:0007613//memory;GO:0008344//adult locomotory behavior;GO:0008542//visual learning;GO:0035176//social behavior;GO:0042326//negative regulation of phosphorylation;GO:0043569//negative regulation of insulin-like growth factor receptor signaling pathway;GO:0045892//ne…
1	BMSK0005361	5.36993	1.33962	12	2303	0.583	0.059	-2.00308	1.25011e-07	0.00201043	down	SMIM14	Uncharacterized protein C4orf34-like [Papilio xuthus]	-	-	-	-	-	-	-
1	BMSK0015391	1.81204	0.05737	12	2303	0.333	0.002	-4.98118	1.33785e-07	0.00215154	down	CECD	BAL70382.1 cecropin D	-	-	-	-	GO:0005576//extracellular region	-	GO:0019731//antibacterial humoral response;GO:0045087//innate immune response
1	BMSK0008344	3.59478	0.182849	12	2303	0.417	0.009	-4.29718	1.34167e-07	0.00215767	down	FAM102A	-	-	-	-	-	-	-	-
1	BMSK0002625	4.31885	0.829482	12	2303	0.5	0.031	-2.38037	1.38591e-07	0.00222882	down	Tret1	facilitated trehalose transporter Tret1-like isoform X2	-	-	-	-	GO:0005886//plasma membrane;GO:0005887//integral component of plasma membrane	GO:0005351//sugar:proton symporter activity;GO:0015574//trehalose transmembrane transporter activity	GO:0015771//trehalose transport
1	BMSK0002376	2.38434	0.238519	12	2303	0.417	0.011	-3.32141	1.43632e-07	0.00230989	down	Cyt-b5	cytochrome b5	-	-	-	-	GO:0005789//endoplasmic reticulum membrane;GO:0016021//integral component of membrane	GO:0020037//heme binding;GO:0046872//metal ion binding	GO:0055114//oxidation-reduction process
1	BMSK0009435	4.49954	0.563568	12	2303	0.5	0.026	-2.99712	1.53275e-07	0.00246498	down	wbl	endoplasmic reticulum resident protein 29 [Papilio machaon]	Genetic Information Processing	Folding, sorting and degradation	ko04141//Protein processing in endoplasmic reticulum	K09586	GO:0005783//endoplasmic reticulum;GO:0005788//endoplasmic reticulum lumen;GO:0012505//endomembrane system	GO:0042803//protein homodimerization activity	GO:0007313//maternal specification of dorsal/ventral axis, oocyte, soma encoded;GO:0009306//protein secretion;GO:0009792//embryo development ending in birth or egg hatching;GO:0009950//dorsal/ventral axis specification;GO:0034975//protein folding in endoplasmic reticulum;GO:0040014//regulation of multicellular organism growth
1	BMSK0001804	4.29441	0.734197	12	2303	0.5	0.029	-2.54822	1.60829e-07	0.00258646	down	l(2)37Cc	prohibitin protein WPH isoform X1	-	-	-	-	GO:0005739//mitochondrion;GO:0016020//membrane	-	GO:0007275//multicellular organism development;GO:0071456//cellular response to hypoxia
1	BMSK0011901	4.64628	0.0797271	12	2303	0.333	0.002	-5.86486	1.62059e-07	0.00260623	down	OSGIN2	XP 004926056.1 oxidative stress-induced growth inhibitor 1 isoform X1	-	-	-	-	-	GO:0008083//growth factor activity	GO:0030308//negative regulation of cell growth;GO:0051321//meiotic cell cycle
1	BMSK0004194	2.88157	0.0510303	12	2303	0.333	0.002	-5.81936	1.6363e-07	0.0026315	down	-	uncharacterized protein LOC101735738 isoform X2	-	-	-	-	-	-	-
1	BMSK0010927	2.25785	0.264144	12	2303	0.417	0.012	-3.09556	1.6399e-07	0.00263728	down	EPS15L1	uncharacterized protein LOC101737345	Cellular Processes	Transport and catabolism	ko04144//Endocytosis	K12472	GO:0005634//nucleus;GO:0005829//cytosol;GO:0005886//plasma membrane;GO:0016020//membrane;GO:0030132//clathrin coat of coated pit	GO:0005509//calcium ion binding;GO:0045296//cadherin binding	GO:0006897//endocytosis;GO:0042059//negative regulation of epidermal growth factor receptor signaling pathway;GO:0061024//membrane organization
1	BMSK0004527	2.86619	0.278387	12	2303	0.417	0.011	-3.36397	1.67754e-07	0.00269781	down	Mmp2	matrix metalloproteinase-14-like [Plutella xylostella]	-	-	-	-	GO:0005615//extracellular space;GO:0005886//plasma membrane;GO:0009897//external side of plasma membrane;GO:0016021//integral component of membrane;GO:0030425//dendrite;GO:0031012//extracellular matrix	GO:0004175//endopeptidase activity;GO:0004222//metalloendopeptidase activity;GO:0008270//zinc ion binding	GO:0002218//activation of innate immune response;GO:0003144//embryonic heart tube formation;GO:0003319//cardioblast migration to the midline involved in heart rudiment formation;GO:0006929//substrate-dependent cell migration;GO:0007419//ventral cord development;GO:0007424//open tracheal system development;GO:0007426//tracheal outgrowth, open tracheal system;GO:0007505//adult fat body development;…
1	BMSK0009324	3.14902	0.238264	12	2303	0.417	0.01	-3.72427	1.74518e-07	0.00280659	down	eIF3-S8	eukaryotic translation initiation factor 3 subunit C isoform X1	Genetic Information Processing	Translation	ko03013//RNA transport	K03252	GO:0005852//eukaryotic translation initiation factor 3 complex;GO:0016282//eukaryotic 43S preinitiation complex;GO:0033290//eukaryotic 48S preinitiation complex	GO:0003743//translation initiation factor activity;GO:0031369//translation initiation factor binding	GO:0001732//formation of cytoplasmic translation initiation complex
1	BMSK0008872	2.46491	0.241269	12	2303	0.417	0.012	-3.35282	1.86499e-07	0.00299927	down	CNPY3	uncharacterized protein LOC101740766	-	-	-	-	GO:0005788//endoplasmic reticulum lumen	GO:0005102//receptor binding	GO:0002224//toll-like receptor signaling pathway;GO:0045087//innate immune response
1	BMSK0010120	7.01667	0.0523272	12	2303	0.333	0.002	-7.06708	1.88026e-07	0.00302383	down	Ctsb	cathepsin B precursor	Cellular Processes;Cellular Processes;Cellular Processes;Organismal Systems;Organismal Systems;Organismal Systems	Transport and catabolism;Transport and catabolism;Cell growth and death;Immune system;Endocrine system;Immune system	ko04142//Lysosome;ko04140//Autophagy - animal;ko04210//Apoptosis;ko04621//NOD-like receptor signaling pathway;ko04924//Renin secretion;ko04612//Antigen processing and presentation	K01363;K01363;K01363;K01363;K01363;K01363	GO:0005576//extracellular region;GO:0005615//extracellular space;GO:0005737//cytoplasm;GO:0005739//mitochondrion;GO:0005764//lysosome;GO:0009897//external side of plasma membrane;GO:0009986//cell surface;GO:0016324//apical plasma membrane;GO:0042383//sarcolemma;GO:0042470//melanosome	GO:0004175//endopeptidase activity;GO:0004197//cysteine-type endopeptidase activity;GO:0030984//kininogen binding;GO:0042277//peptide binding;GO:0043621//protein self-association;GO:0044877//macromolecular complex binding	GO:0006508//proteolysis;GO:0006914//autophagy;GO:0007283//spermatogenesis;GO:0007519//skeletal muscle tissue development;GO:0009611//response to wounding;GO:0009612//response to mechanical stimulus;GO:0009749//response to glucose;GO:0014070//response to organic cyclic compound;GO:0014075//response to amine;GO:0034097//response to cytokine;GO:0043434//response to peptide hormone;GO:0045471//respon…
1	BMSK0006970	2.0635	0.064268	12	2303	0.333	0.003	-5.00485	2.11577e-07	0.00340259	down	AGO2	argonaute 2 isoform X1	-	-	-	-	GO:0005634//nucleus;GO:0005737//cytoplasm;GO:0005829//cytosol;GO:0016442//RISC complex;GO:0035068//micro-ribonucleoprotein complex;GO:0070578//RISC-loading complex;GO:0071598//neuronal ribonucleoprotein granule;GO:1990124//messenger ribonucleoprotein complex	GO:0004521//endoribonuclease activity;GO:0035197//siRNA binding;GO:0046872//metal ion binding	GO:0007279//pole cell formation;GO:0007349//cellularization;GO:0007367//segment polarity determination;GO:0009047//dosage compensation by hyperactivation of X chromosome;GO:0010526//negative regulation of transposition, RNA-mediated;GO:0016032//viral process;GO:0016246//RNA interference;GO:0030422//production of siRNA involved in RNA interference;GO:0030423//targeting of mRNA for destruction invo…
1	BMSK0015783	3.80864	0.682069	12	2303	0.5	0.031	-2.48128	2.23493e-07	0.00359422	down	-	XP 021208504.1 vacuolar ATPase subunit C isoform X1	Metabolism;Human Diseases;Metabolism;Environmental Information Processing;Cellular Processes;Human Diseases;Human Diseases;Organismal Systems;Human Diseases;Organismal Systems	Global and overview maps;Infectious diseases;Energy metabolism;Signal transduction;Transport and catabolism;Infectious diseases;Infectious diseases;Nervous system;Immune diseases;Excretory system	ko01100//Metabolic pathways;ko05165//Human papillomavirus infection;ko00190//Oxidative phosphorylation;ko04150//mTOR signaling pathway;ko04145//Phagosome;ko05110//Vibrio cholerae infection;ko05120//Epithelial cell signaling in Helicobacter pylori infection;ko04721//Synaptic vesicle cycle;ko05323//Rheumatoid arthritis;ko04966//Collecting duct acid secretion	K02148;K02148;K02148;K02148;K02148;K02148;K02148;K02148;K02148;K02148	GO:0033180//proton-transporting V-type ATPase, V1 domain	GO:0015078//hydrogen ion transmembrane transporter activity	GO:0015991//ATP hydrolysis coupled proton transport
1	BMSK0002974	2.30804	0.309055	12	2303	0.417	0.013	-2.90073	2.31968e-07	0.00373052	down	ATL2	atlastin-like	-	-	-	-	GO:0005783//endoplasmic reticulum;GO:0005789//endoplasmic reticulum membrane;GO:0016020//membrane;GO:0016021//integral component of membrane;GO:0098826//endoplasmic reticulum tubular network membrane	GO:0003924//GTPase activity;GO:0005525//GTP binding;GO:0042802//identical protein binding	GO:0007029//endoplasmic reticulum organization;GO:0007030//Golgi organization;GO:0051260//protein homooligomerization;GO:1990809//endoplasmic reticulum tubular network membrane organization
1	BMSK0008123	1.73568	0.0881088	12	2303	0.333	0.003	-4.30007	2.41474e-07	0.00388338	down	-	-	-	-	-	-	-	-	-
1	BMSK0008729	4.76917	0.180235	12	2303	0.417	0.009	-4.72579	2.72021e-07	0.00437464	down	-	hypothetical protein KGM 02075 [Danaus plexippus]	-	-	-	-	-	-	-
1	BMSK0008651	4.57161	0.611964	12	2303	0.5	0.027	-2.90118	2.77973e-07	0.00447035	down	Spn88Ea	serine protease inhibitor 6 isoform X1	-	-	-	-	GO:0005576//extracellular region;GO:0005615//extracellular space	GO:0004867//serine-type endopeptidase inhibitor activity	GO:0002376//immune system process;GO:0010951//negative regulation of endopeptidase activity;GO:0042438//melanin biosynthetic process;GO:0045751//negative regulation of Toll signaling pathway;GO:0045824//negative regulation of innate immune response;GO:0045861//negative regulation of proteolysis;GO:0048526//imaginal disc-derived wing expansion
1	BMSK0005322	23.6235	6.64925	12	2303	1	0.272	-1.82896	3.1852e-07	0.00512244	down	Serbp1	Vasa intronic protein [Operophtera brumata]	-	-	-	-	GO:0005634//nucleus;GO:0005737//cytoplasm;GO:0005829//cytosol;GO:0005886//plasma membrane;GO:0048471//perinuclear region of cytoplasm	GO:0003730//mRNA 3'-UTR binding;GO:0032183//SUMO binding	GO:0030578//PML body organization;GO:0042981//regulation of apoptotic process
1	BMSK0000357	7.45811	0.373178	12	2303	0.5	0.02	-4.32087	3.18871e-07	0.00512809	down	Plod	procollagen-lysine,2-oxoglutarate 5-dioxygenase 1 isoform X1	Metabolism	Amino acid metabolism	ko00310//Lysine degradation	K13647	GO:0005615//extracellular space;GO:0005783//endoplasmic reticulum;GO:0048471//perinuclear region of cytoplasm	GO:0005506//iron ion binding;GO:0008475//procollagen-lysine 5-dioxygenase activity;GO:0031418//L-ascorbic acid binding	GO:0007295//growth of a germarium-derived egg chamber;GO:0017185//peptidyl-lysine hydroxylation;GO:0030199//collagen fibril organization;GO:0032963//collagen metabolic process;GO:0046947//hydroxylysine biosynthetic process
1	BMSK0007391	4.35013	1.02979	12	2303	0.5	0.038	-2.07871	3.31979e-07	0.00533889	down	SEC61G	transport protein SEC61	Genetic Information Processing;Cellular Processes;Human Diseases;Genetic Information Processing	Folding, sorting and degradation;Transport and catabolism;Infectious diseases;Folding, sorting and degradation	ko04141//Protein processing in endoplasmic reticulum;ko04145//Phagosome;ko05110//Vibrio cholerae infection;ko03060//Protein export	K07342;K07342;K07342;K07342	GO:0005789//endoplasmic reticulum membrane;GO:0016021//integral component of membrane	GO:0008565//protein transporter activity;GO:0015450//P-P-bond-hydrolysis-driven protein transmembrane transporter activity	GO:0045047//protein targeting to ER
1	BMSK0003060	4.11331	0.999872	12	2303	0.5	0.039	-2.04048	3.46034e-07	0.00556493	down	COX5A	cytochrome c oxidase subunit Va	Metabolism;Organismal Systems;Human Diseases;Human Diseases;Human Diseases;Metabolism;Human Diseases;Organismal Systems	Global and overview maps;Environmental adaptation;Neurodegenerative diseases;Neurodegenerative diseases;Neurodegenerative diseases;Energy metabolism;Endocrine and metabolic diseases;Circulatory system	ko01100//Metabolic pathways;ko04714//Thermogenesis;ko05016//Huntington disease;ko05010//Alzheimer disease;ko05012//Parkinson disease;ko00190//Oxidative phosphorylation;ko04932//Non-alcoholic fatty liver disease (NAFLD);ko04260//Cardiac muscle contraction	K02264;K02264;K02264;K02264;K02264;K02264;K02264;K02264	GO:0005739//mitochondrion;GO:0005751//mitochondrial respiratory chain complex IV	GO:0004129//cytochrome-c oxidase activity;GO:0046872//metal ion binding	GO:0006123//mitochondrial electron transport, cytochrome c to oxygen;GO:0007406//negative regulation of neuroblast proliferation;GO:0045787//positive regulation of cell cycle
1	BMSK0014055	15.2536	2.51251	12	2303	0.75	0.095	-2.60195	3.47022e-07	0.00558081	down	-	ABF51339.1 ferritin isoform 1	-	-	-	-	-	-	-
1	BMSK0007985	3.35268	0.195917	12	2303	0.417	0.01	-4.097	3.47241e-07	0.00558433	down	-	uncharacterized protein LOC105842936	-	-	-	-	-	-	-
1	BMSK0015993	2.2405	0.389663	12	2303	0.417	0.017	-2.52352	3.87602e-07	0.00623341	down	Spn77Ba	AAS68505.1 serpin-4A	-	-	-	-	GO:0005615//extracellular space	GO:0004867//serine-type endopeptidase inhibitor activity	GO:0010951//negative regulation of endopeptidase activity;GO:0035009//negative regulation of melanization defense response;GO:0042438//melanin biosynthetic process;GO:0045861//negative regulation of proteolysis
1	BMSK0003692	7.34655	3.06109	12	2303	0.667	0.12	-1.26302	4.00754e-07	0.00644493	down	-	hematological and neurological expressed 1 protein	-	-	-	-	-	-	-
1	BMSK0005212	64.981	17.5988	12	2303	1	0.487	-1.88454	4.04159e-07	0.00649969	down	-	heat shock protein 70	Genetic Information Processing;Cellular Processes;Genetic Information Processing;Human Diseases;Environmental Information Processing;Human Diseases;Organismal Systems;Organismal Systems;Human Diseases;Human Diseases;Human Diseases;Organismal Systems;Human Diseases	Folding, sorting and degradation;Transport and catabolism;Transcription;Infectious diseases;Signal transduction;Infectious diseases;Aging;Endocrine system;Infectious diseases;Infectious diseases;Infectious diseases;Immune system;Neurodegenerative diseases	ko04141//Protein processing in endoplasmic reticulum;ko04144//Endocytosis;ko03040//Spliceosome;ko05169//Epstein-Barr virus infection;ko04010//MAPK signaling pathway;ko05164//Influenza A;ko04213//Longevity regulating pathway - multiple species;ko04915//Estrogen signaling pathway;ko05145//Toxoplasmosis;ko05162//Measles;ko05134//Legionellosis;ko04612//Antigen processing and presentation;ko05020//Pri…	K03283;K03283;K03283;K03283;K03283;K03283;K03283;K03283;K03283;K03283;K03283;K03283;K03283	GO:0005634//nucleus	GO:0005524//ATP binding	-
1	BMSK0010125	5.62753	0.496519	12	2303	0.5	0.023	-3.50258	4.07691e-07	0.00655648	down	Spase12	signal peptidase complex subunit 1 [Amyelois transitella]	Genetic Information Processing	Folding, sorting and degradation	ko03060//Protein export	K12946	GO:0005787//signal peptidase complex;GO:0030176//integral component of endoplasmic reticulum membrane	GO:0008233//peptidase activity	GO:0006465//signal peptide processing;GO:0045047//protein targeting to ER
1	BMSK0012222	5.42281	1.71263	12	2303	0.583	0.074	-1.66283	4.2564e-07	0.00684515	down	ubq-1	uncharacterized protein LOC103519968 isoform X3 [Diaphorina citri]	Organismal Systems	Endocrine system	ko03320//PPAR signaling pathway	K08770	GO:0005634//nucleus;GO:0005737//cytoplasm	GO:0031386//protein tag;GO:0031625//ubiquitin protein ligase binding	GO:0016567//protein ubiquitination;GO:0019941//modification-dependent protein catabolic process
1	BMSK0015594	4.41463	0.291789	12	2303	0.417	0.012	-3.9193	4.73373e-07	0.00761278	down	l(2)efl	ACM24338.1 heat shock protein 20.8	Genetic Information Processing;Organismal Systems	Folding, sorting and degradation;Aging	ko04141//Protein processing in endoplasmic reticulum;ko04213//Longevity regulating pathway - multiple species	K09542;K09542	GO:0030018//Z disc;GO:0048471//perinuclear region of cytoplasm	GO:0051082//unfolded protein binding	GO:0007275//multicellular organism development;GO:0009408//response to heat;GO:0010998//regulation of translational initiation by eIF2 alpha phosphorylation;GO:0042026//protein refolding;GO:0045214//sarcomere organization;GO:0061077//chaperone-mediated protein folding
1	BMSK0005419	7.05207	3.18553	12	2303	0.667	0.122	-1.14651	4.96537e-07	0.0079853	down	Ran	GTP-binding nuclear protein Ran isoform X1	Genetic Information Processing;Human Diseases;Human Diseases;Genetic Information Processing	Translation;Infectious diseases;Infectious diseases;Translation	ko03013//RNA transport;ko05166//HTLV-I infection;ko05169//Epstein-Barr virus infection;ko03008//Ribosome biogenesis in eukaryotes	K07936;K07936;K07936;K07936	GO:0005634//nucleus;GO:0005635//nuclear envelope;GO:0005737//cytoplasm;GO:0005938//cell cortex;GO:1990498//mitotic spindle microtubule	GO:0003924//GTPase activity;GO:0005525//GTP binding;GO:0046872//metal ion binding	GO:0000132//establishment of mitotic spindle orientation;GO:0000212//meiotic spindle organization;GO:0006606//protein import into nucleus;GO:0006611//protein export from nucleus;GO:0006886//intracellular protein transport;GO:0007346//regulation of mitotic cell cycle;GO:0032880//regulation of protein localization;GO:0051301//cell division
1	BMSK0011786	2.58131	0.0892851	12	2303	0.333	0.003	-4.85354	5.17512e-07	0.00832263	down	Pgi	glucose-6-phosphate isomerase	Metabolism;Metabolism;Metabolism;Metabolism;Metabolism;Metabolism	Global and overview maps;Global and overview maps;Carbohydrate metabolism;Carbohydrate metabolism;Carbohydrate metabolism;Carbohydrate metabolism	ko01100//Metabolic pathways;ko01200//Carbon metabolism;ko00010//Glycolysis / Gluconeogenesis;ko00520//Amino sugar and nucleotide sugar metabolism;ko00030//Pentose phosphate pathway;ko00500//Starch and sucrose metabolism	K01810;K01810;K01810;K01810;K01810;K01810	GO:0005829//cytosol	GO:0004347//glucose-6-phosphate isomerase activity	GO:0006094//gluconeogenesis;GO:0006096//glycolytic process;GO:0042593//glucose homeostasis
1	BMSK0014531	3.81665	1.15396	12	2303	0.5	0.051	-1.72572	5.26454e-07	0.00846643	down	-	uncharacterized protein LOC106120002 [Papilio xuthus]	-	-	-	-	-	-	-
1	BMSK0003567	4.34479	0.91481	12	2303	0.5	0.04	-2.24774	5.64532e-07	0.0090788	down	Rap1	ras protein	Environmental Information Processing;Environmental Information Processing;Environmental Information Processing;Environmental Information Processing;Cellular Processes;Cellular Processes;Organismal Systems;Human Diseases;Organismal Systems;Organismal Systems;Organismal Systems;Human Diseases;Organismal Systems;Organismal Systems	Signal transduction;Signal transduction;Signal transduction;Signal transduction;Cellular community - eukaryotes;Cellular community - eukaryotes;Digestive system;Endocrine and metabolic diseases;Immune system;Immune system;Nervous system;Cancers;Nervous system;Immune system	ko04024//cAMP signaling pathway;ko04010//MAPK signaling pathway;ko04014//Ras signaling pathway;ko04015//Rap1 signaling pathway;ko04510//Focal adhesion;ko04530//Tight junction;ko04972//Pancreatic secretion;ko04934//Cushing syndrome;ko04611//Platelet activation;ko04062//Chemokine signaling pathway;ko04722//Neurotrophin signaling pathway;ko05211//Renal cell carcinoma;ko04720//Long-term potentiation;…	K04353;K04353;K04353;K04353;K04353;K04353;K04353;K04353;K04353;K04353;K04353;K04353;K04353;K04353	GO:0005886//plasma membrane;GO:0031252//cell leading edge	GO:0003924//GTPase activity;GO:0005525//GTP binding	GO:0006930//substrate-dependent cell migration, cell extension;GO:0007391//dorsal closure;GO:0007465//R7 cell fate commitment;GO:0007601//visual perception;GO:0008293//torso signaling pathway;GO:0016476//regulation of embryonic cell shape;GO:0022409//positive regulation of cell-cell adhesion;GO:0030713//ovarian follicle cell stalk formation;GO:0030718//germ-line stem cell population maintenance;G…
1	BMSK0001499	5.51342	0.721696	12	2303	0.5	0.031	-2.93349	6.06622e-07	0.0097557	down	exc-4	chloride intracellular channel isoform X1	-	-	-	-	GO:0005634//nucleus;GO:0005764//lysosome;GO:0005887//integral component of plasma membrane;GO:0016324//apical plasma membrane;GO:0034707//chloride channel complex;GO:0043296//apical junction complex	GO:0005244//voltage-gated ion channel activity;GO:0005254//chloride channel activity	GO:0002064//epithelial cell development;GO:0034765//regulation of ion transmembrane transport;GO:0035150//regulation of tube size
											152

## Sheet: 2
Cluster	GeneID	CK	BmNPV	cells.1	cells.2	pct.1	pct.2	log2FC	p_value	p_val_adjust	significance	Symbol	Description	KEGG_A_class	KEGG_B_class	Pathway	K_ID	GO Component	GO Function	GO Process
2	BMSK0006276	28.1418	89.1337	114	1942	0.974	0.95	1.66325	1.78585e-89	2.872e-85	up	RpS28	RS28 BOMMO RecName: Full=40S ribosomal protein S28	Genetic Information Processing	Translation	ko03010//Ribosome	K02979	GO:0022627//cytosolic small ribosomal subunit;GO:0042788//polysomal ribosome;GO:0098556//cytoplasmic side of rough endoplasmic reticulum membrane	GO:0003735//structural constituent of ribosome	GO:0002181//cytoplasmic translation
2	BMSK0008657	18.3121	49.9884	114	1942	0.965	0.868	1.44879	9.2929e-82	1.49448e-77	up	RpL30	ribosomal protein L30 isoform X1	Genetic Information Processing	Translation	ko03010//Ribosome	K02908	GO:0005840//ribosome	GO:0003723//RNA binding;GO:0003735//structural constituent of ribosome	GO:0006412//translation
2	BMSK0001031	10.9861	33.9423	114	1942	0.86	0.811	1.62741	5.80212e-79	9.33096e-75	up	RpS21	RS21 BOMMO RecName: Full=40S ribosomal protein S21	Genetic Information Processing	Translation	ko03010//Ribosome	K02971	GO:0005791//rough endoplasmic reticulum;GO:0005829//cytosol;GO:0005840//ribosome	GO:0003735//structural constituent of ribosome	GO:0006412//translation
2	BMSK0011289	32.1808	83.9816	114	1942	0.991	0.943	1.38387	4.45454e-78	7.16379e-74	up	Rpl12	ribosomal protein L12	Genetic Information Processing	Translation	ko03010//Ribosome	K02870	GO:0015934//large ribosomal subunit;GO:0022625//cytosolic large ribosomal subunit	GO:0003735//structural constituent of ribosome;GO:0019843//rRNA binding;GO:0070180//large ribosomal subunit rRNA binding	GO:0000027//ribosomal large subunit assembly;GO:0006412//translation;GO:0045901//positive regulation of translational elongation
2	BMSK0001399	11.2552	31.736	114	1942	0.877	0.791	1.49552	1.47126e-73	2.36608e-69	up	RpL37A	ribosomal protein L37A	Genetic Information Processing	Translation	ko03010//Ribosome	K02921	GO:0022625//cytosolic large ribosomal subunit	GO:0003735//structural constituent of ribosome;GO:0046872//metal ion binding	GO:0002181//cytoplasmic translation
2	BMSK0005571	39.4714	113.761	114	1942	0.991	0.955	1.52712	6.19978e-73	9.97049e-69	up	RpS15Aa	ribosomal protein S15A	Genetic Information Processing	Translation	ko03010//Ribosome	K02957	GO:0022626//cytosolic ribosome;GO:0022627//cytosolic small ribosomal subunit	GO:0003735//structural constituent of ribosome	GO:0002181//cytoplasmic translation
2	BMSK0007539	28.541	71.3408	114	1942	1	0.903	1.32169	2.16979e-71	3.48946e-67	up	RpS10	ribosomal protein S10 isoform X1	Genetic Information Processing	Translation	ko03010//Ribosome	K02947	GO:0005840//ribosome	-	-
2	BMSK0009038	22.1158	56.0473	114	1942	0.974	0.877	1.34156	4.46603e-71	7.18227e-67	up	rpl35a	ribosomal protein L35A	Genetic Information Processing	Translation	ko03010//Ribosome	K02917	GO:0005840//ribosome	GO:0000049//tRNA binding;GO:0003735//structural constituent of ribosome	GO:0006412//translation
2	BMSK0012298	25.5349	73.7902	114	1942	0.965	0.911	1.53096	3.87166e-70	6.22641e-66	up	RpL36	ribosomal protein L36	Genetic Information Processing	Translation	ko03010//Ribosome	K02920	GO:0005730//nucleolus;GO:0005737//cytoplasm;GO:0022625//cytosolic large ribosomal subunit;GO:0022626//cytosolic ribosome	GO:0003735//structural constituent of ribosome	GO:0002181//cytoplasmic translation
2	BMSK0013462	33.767	90.1833	114	1942	0.974	0.932	1.41725	8.23071e-70	1.32366e-65	up	RpS13	ribosomal protein S13	Genetic Information Processing	Translation	ko03010//Ribosome	K02953	GO:0005840//ribosome	GO:0003735//structural constituent of ribosome	GO:0006412//translation
2	BMSK0001224	21.0633	51.7494	114	1942	0.974	0.881	1.29681	3.46096e-68	5.56592e-64	up	Rack1	AEH16566.1 receptor for activated protein kinase C	Human Diseases	Infectious diseases	ko05162//Measles	K14753	GO:0005634//nucleus;GO:0005737//cytoplasm;GO:0005776//autophagosome;GO:0005829//cytosol;GO:0022627//cytosolic small ribosomal subunit;GO:0071011//precatalytic spliceosome;GO:0071013//catalytic step 2 spliceosome	GO:0005080//protein kinase C binding;GO:0019899//enzyme binding;GO:0043022//ribosome binding	GO:0000398//mRNA splicing, via spliceosome;GO:0001933//negative regulation of protein phosphorylation;GO:0001934//positive regulation of protein phosphorylation;GO:0007626//locomotory behavior;GO:0009267//cellular response to starvation;GO:0016243//regulation of autophagosome size;GO:0018991//oviposition;GO:0030838//positive regulation of actin filament polymerization;GO:0035220//wing disc develo…
2	BMSK0001949	26.9962	69.3539	114	1942	0.974	0.898	1.36122	8.3158e-65	1.33735e-60	up	Rpl35	ribosomal protein L35	Genetic Information Processing	Translation	ko03010//Ribosome	K02918	GO:0022625//cytosolic large ribosomal subunit	GO:0003729//mRNA binding;GO:0003735//structural constituent of ribosome;GO:0043021//ribonucleoprotein complex binding	GO:0000463//maturation of LSU-rRNA from tricistronic rRNA transcript (SSU-rRNA, 5.8S rRNA, LSU-rRNA);GO:0006412//translation
2	BMSK0014687	28.6835	72.79	114	1942	0.974	0.913	1.34352	1.76593e-62	2.83997e-58	up	pex6	ribosomal protein S25	Cellular Processes	Transport and catabolism	ko04146//Peroxisome	K13339	GO:0005777//peroxisome;GO:0005778//peroxisomal membrane;GO:0005829//cytosol	GO:0005524//ATP binding;GO:0016887//ATPase activity	GO:0006625//protein targeting to peroxisome;GO:0007031//peroxisome organization;GO:0016558//protein import into peroxisome matrix
2	BMSK0005529	33.088	82.0646	114	1942	0.974	0.932	1.31045	4.29531e-62	6.90772e-58	up	RPL23A	ribosomal protein L23A	Genetic Information Processing	Translation	ko03010//Ribosome	K02893	GO:0005634//nucleus;GO:0022625//cytosolic large ribosomal subunit	GO:0003735//structural constituent of ribosome;GO:0019843//rRNA binding;GO:1904841//TORC2 complex binding	GO:0000027//ribosomal large subunit assembly;GO:0006412//translation
2	BMSK0008161	29.4837	68.9381	114	1942	0.974	0.912	1.22539	5.51999e-62	8.87724e-58	up	RpL28	ribosomal protein L28	Genetic Information Processing	Translation	ko03010//Ribosome	K02903	GO:0005840//ribosome	GO:0003735//structural constituent of ribosome	GO:0006412//translation
2	BMSK0013304	24.3323	60.0198	114	1942	0.965	0.854	1.30257	1.20558e-60	1.93881e-56	up	RpL18A	XP 021207863.1 ribosomal protein L18A isoform X1	Genetic Information Processing	Translation	ko03010//Ribosome	K02882	GO:0005840//ribosome	GO:0003735//structural constituent of ribosome	GO:0006412//translation
2	BMSK0014093	44.892	126.957	114	1942	0.991	0.951	1.49981	5.6561e-60	9.09615e-56	up	RpL32	ribosomal protein L32	Genetic Information Processing	Translation	ko03010//Ribosome	K02912	GO:0005840//ribosome	GO:0003735//structural constituent of ribosome	GO:0006412//translation
2	BMSK0011589	32.7725	78.5157	114	1942	0.991	0.923	1.26049	1.44216e-59	2.31928e-55	up	RpS12	XP 012550525.1 ribosomal protein S12 isoform X1	Genetic Information Processing	Translation	ko03010//Ribosome	K02951	GO:0022627//cytosolic small ribosomal subunit	GO:0003735//structural constituent of ribosome	GO:0002181//cytoplasmic translation
2	BMSK0013760	13.177	55.8275	114	1942	0.912	0.918	2.08295	3.61757e-59	5.81778e-55	up	-	-	-	-	-	-	-	-	-
2	BMSK0013364	31.9731	75.6198	114	1942	0.982	0.921	1.2419	3.19503e-58	5.13825e-54	up	FAU	ribosomal protein S30	Genetic Information Processing	Translation	ko03010//Ribosome	K02983	GO:0022627//cytosolic small ribosomal subunit	GO:0003735//structural constituent of ribosome	GO:0006412//translation
2	BMSK0010322	37.9487	94.9592	114	1942	0.991	0.942	1.32326	1.50961e-56	2.42775e-52	up	RpS24	AAS91555.1 ribosomal protein S24	Genetic Information Processing	Translation	ko03010//Ribosome	K02974	GO:0005840//ribosome	GO:0003735//structural constituent of ribosome	GO:0006412//translation
2	BMSK0001120	28.8725	66.1542	114	1942	0.991	0.902	1.19613	1.34255e-54	2.15909e-50	up	RpS26	ribosomal protein S26	Genetic Information Processing	Translation	ko03010//Ribosome	K02976	GO:0022627//cytosolic small ribosomal subunit;GO:0042788//polysomal ribosome;GO:0098556//cytoplasmic side of rough endoplasmic reticulum membrane	GO:0003729//mRNA binding;GO:0003735//structural constituent of ribosome	GO:0002181//cytoplasmic translation
2	BMSK0001139	22.7594	50.2664	114	1942	0.965	0.857	1.14313	4.23233e-54	6.80643e-50	up	RpL34	ibosomal protein L34 isoform X1	Genetic Information Processing	Translation	ko03010//Ribosome	K02915	GO:0005840//ribosome	GO:0003735//structural constituent of ribosome	GO:0006412//translation
2	BMSK0007017	27.0175	67.1449	114	1942	0.974	0.891	1.31338	2.76503e-52	4.44672e-48	up	RpL9	ribosomal protein L9 isoform X1	Genetic Information Processing	Translation	ko03010//Ribosome	K02940	GO:0005840//ribosome	GO:0003735//structural constituent of ribosome;GO:0019843//rRNA binding	GO:0006412//translation
2	BMSK0008606	48.8733	115.558	114	1942	1	0.952	1.2415	3.139e-51	5.04814e-47	up	RPS5	ribosomal protein S5	Genetic Information Processing	Translation	ko03010//Ribosome	K02989	GO:0022627//cytosolic small ribosomal subunit	GO:0003729//mRNA binding;GO:0003735//structural constituent of ribosome;GO:0019843//rRNA binding	GO:0000028//ribosomal small subunit assembly;GO:0006412//translation;GO:0006450//regulation of translational fidelity
2	BMSK0014309	11.2489	23.5365	114	1942	0.86	0.752	1.06512	5.22028e-51	8.39525e-47	up	sesB	XP 004934243.2 ADP,ATP carrier protein	Human Diseases;Human Diseases;Human Diseases;Environmental Information Processing;Environmental Information Processing;Human Diseases;Cellular Processes;Cellular Processes	Neurodegenerative diseases;Neurodegenerative diseases;Infectious diseases;Signal transduction;Signal transduction;Infectious diseases;Cell growth and death;Cell growth and death	ko05016//Huntington disease;ko05012//Parkinson disease;ko05166//HTLV-I infection;ko04020//Calcium signaling pathway;ko04022//cGMP - PKG signaling pathway;ko05164//Influenza A;ko04218//Cellular senescence;ko04217//Necroptosis	K05863;K05863;K05863;K05863;K05863;K05863;K05863;K05863	GO:0005739//mitochondrion;GO:0005743//mitochondrial inner membrane;GO:0016021//integral component of membrane;GO:0045202//synapse	GO:0005471//ATP:ADP antiporter activity	GO:0001508//action potential;GO:0006839//mitochondrial transport;GO:0007268//synaptic transmission;GO:0008340//determination of adult lifespan;GO:0010507//negative regulation of autophagy;GO:0015866//ADP transport;GO:0015867//ATP transport;GO:0034599//cellular response to oxidative stress;GO:0040011//locomotion;GO:0046716//muscle cell cellular homeostasis;GO:0048477//oogenesis;GO:0048489//synapti…
2	BMSK0008918	25.5692	56.9297	114	1942	0.974	0.893	1.15478	3.33486e-50	5.36313e-46	up	RpL10A	ribosomal protein L10A	Genetic Information Processing	Translation	ko03010//Ribosome	K02865	GO:0015934//large ribosomal subunit	GO:0003723//RNA binding;GO:0003735//structural constituent of ribosome	GO:0006412//translation
2	BMSK0014700	18.662	39.3267	114	1942	0.939	0.817	1.07541	6.94102e-50	1.11626e-45	up	RpS29	RS29 BOMMO RecName: Full=40S ribosomal protein S29	Genetic Information Processing	Translation	ko03010//Ribosome	K02980	GO:0005791//rough endoplasmic reticulum;GO:0022627//cytosolic small ribosomal subunit;GO:0042788//polysomal ribosome	GO:0003735//structural constituent of ribosome;GO:0008270//zinc ion binding	GO:0002181//cytoplasmic translation
2	BMSK0002686	41.9652	93.009	114	1942	1	0.937	1.14818	2.68502e-49	4.31804e-45	up	RpL13	ribosomal protein L13 isoform X1	Genetic Information Processing	Translation	ko03010//Ribosome	K02873	GO:0005840//ribosome	GO:0003735//structural constituent of ribosome	GO:0006412//translation
2	BMSK0012034	38.8037	90.4605	114	1942	0.982	0.931	1.22109	2.49967e-47	4.01997e-43	up	RpL17	60S ribosomal protein L17	Genetic Information Processing	Translation	ko03010//Ribosome	K02880	GO:0015934//large ribosomal subunit	GO:0003735//structural constituent of ribosome	GO:0006412//translation
2	BMSK0012680	13.9022	30.2918	114	1942	0.895	0.778	1.12362	8.94704e-47	1.43886e-42	up	RpL37	ribosomal protein L37	Genetic Information Processing	Translation	ko03010//Ribosome	K02922	GO:0005840//ribosome	GO:0003735//structural constituent of ribosome;GO:0019843//rRNA binding;GO:0046872//metal ion binding	GO:0006412//translation
2	BMSK0002290	76.7258	202.704	114	1942	1	0.981	1.40159	4.94369e-46	7.95044e-42	up	Tctp	translationally-controlled tumor protein homolog isoform X2	-	-	-	-	GO:0005737//cytoplasm	-	-
2	BMSK0012090	29.1492	57.1404	114	1942	0.991	0.882	0.971054	5.48625e-44	8.82299e-40	up	RPS15	AAU11820.1 ribosomal protein S15	Genetic Information Processing	Translation	ko03010//Ribosome	K02958	GO:0015935//small ribosomal subunit	GO:0003723//RNA binding;GO:0003735//structural constituent of ribosome	GO:0006412//translation
2	BMSK0013426	3.79698	10.1779	114	1942	0.605	0.518	1.42252	5.70191e-42	9.16981e-38	up	RpL38	60S ribosomal protein L38	Genetic Information Processing	Translation	ko03010//Ribosome	K02923	GO:0005840//ribosome	GO:0003735//structural constituent of ribosome	GO:0006412//translation
2	BMSK0006560	32.0178	66.8494	114	1942	0.974	0.905	1.06204	2.60697e-40	4.19253e-36	up	RpL14	ribosomal protein L14	Genetic Information Processing	Translation	ko03010//Ribosome	K02875	GO:0005840//ribosome	GO:0003723//RNA binding;GO:0003735//structural constituent of ribosome	GO:0006412//translation;GO:0043524//negative regulation of neuron apoptotic process
2	BMSK0009129	47.1333	99.2821	114	1942	0.991	0.938	1.07479	4.11854e-39	6.62343e-35	up	rpl6	ribosomal protein L6 isoform X1	Genetic Information Processing	Translation	ko03010//Ribosome	K02934	GO:0022625//cytosolic large ribosomal subunit;GO:0031012//extracellular matrix	GO:0003723//RNA binding;GO:0003735//structural constituent of ribosome	GO:0000027//ribosomal large subunit assembly;GO:0002181//cytoplasmic translation
2	BMSK0008190	50.0455	110.375	114	1942	0.991	0.944	1.14111	1.15729e-38	1.86115e-34	up	RpS16	ribosomal protein S16	Genetic Information Processing	Translation	ko03010//Ribosome	K02960	GO:0005840//ribosome	GO:0003735//structural constituent of ribosome	GO:0006412//translation
2	809259	4.74418	20.4479	114	1942	0.623	0.645	2.10772	4.17948e-37	6.72144e-33	up	ND4	-	-	-	-	-	-	-	-
2	BMSK0007162	34.2183	66.3448	114	1942	0.991	0.9	0.955213	6.3186e-37	1.01616e-32	up	RpL40	ubiquitin	Genetic Information Processing	Translation	ko03010//Ribosome	K02927	GO:0005634//nucleus;GO:0005737//cytoplasm;GO:0005829//cytosol;GO:0022625//cytosolic large ribosomal subunit;GO:0022627//cytosolic small ribosomal subunit	GO:0003735//structural constituent of ribosome;GO:0031386//protein tag;GO:0031625//ubiquitin protein ligase binding	GO:0002181//cytoplasmic translation;GO:0006412//translation;GO:0006464//cellular protein modification process;GO:0006511//ubiquitin-dependent protein catabolic process;GO:0016567//protein ubiquitination;GO:0019941//modification-dependent protein catabolic process
2	BMSK0007663	13.7448	22.1092	114	1942	0.921	0.688	0.685763	6.88583e-37	1.10738e-32	up	RpL31	ribosomal protein L31	Genetic Information Processing	Translation	ko03010//Ribosome	K02910	GO:0005840//ribosome	GO:0003735//structural constituent of ribosome	GO:0006412//translation
2	BMSK0002718	6.26758	8.36848	114	1942	0.781	0.456	0.417058	1.18199e-36	1.90087e-32	up	eEF1delta	elongation factor 1 delta	Human Diseases	Infectious diseases	ko05168//Herpes simplex infection	K15410	GO:0005853//eukaryotic translation elongation factor 1 complex	GO:0003746//translation elongation factor activity	GO:0006414//translational elongation
2	809258	5.82063	18.6894	114	1942	0.693	0.61	1.68297	2.74841e-36	4.42e-32	up	ND5	-	-	-	-	-	-	-	-
2	BMSK0014360	5.41428	7.39506	114	1942	0.737	0.357	0.449791	3.11704e-36	5.01282e-32	up	eIF1	AAR04678.1 Sui1	-	-	-	-	GO:0016282//eukaryotic 43S preinitiation complex	GO:0003723//RNA binding;GO:0003743//translation initiation factor activity;GO:0043024//ribosomal small subunit binding	-
2	BMSK0015677	5.24892	10.2181	114	1942	0.728	0.48	0.96103	1.07259e-35	1.72494e-31	up	GBETA1	heterotrimeric guanine nucleotide-binding protein beta subunit isoform X1	Human Diseases;Environmental Information Processing;Environmental Information Processing;Human Diseases;Organismal Systems;Human Diseases;Environmental Information Processing;Organismal Systems;Organismal Systems;Organismal Systems;Organismal Systems;Human Diseases;Organismal Systems;Human Diseases;Organismal Systems;Organismal Systems;Organismal Systems;Organismal Systems;Organismal Systems	Cancers;Signal transduction;Signal transduction;Substance dependence;Nervous system;Infectious diseases;Signal transduction;Nervous system;Immune system;Environmental adaptation;Endocrine system;Infectious diseases;Nervous system;Substance dependence;Nervous system;Nervous system;Nervous system;Sensory system;Sensory system	ko05200//Pathways in cancer;ko04151//PI3K-Akt signaling pathway;ko04014//Ras signaling pathway;ko05034//Alcoholism;ko04723//Retrograde endocannabinoid signaling;ko05163//Human cytomegalovirus infection;ko04371//Apelin signaling pathway;ko04728//Dopaminergic synapse;ko04062//Chemokine signaling pathway;ko04713//Circadian entrainment;ko04926//Relaxin signaling pathway;ko05167//Kaposi sarcoma-associ…	K04536;K04536;K04536;K04536;K04536;K04536;K04536;K04536;K04536;K04536;K04536;K04536;K04536;K04536;K04536;K04536;K04536;K04536;K04536	-	-	GO:0007165//signal transduction
2	BMSK0004430	3.13514	4.95113	114	1942	0.561	0.218	0.659225	2.06276e-35	3.31733e-31	up	Chchd2	GA18592-PA	-	-	-	-	GO:0005634//nucleus;GO:0005739//mitochondrion;GO:0005758//mitochondrial intermembrane space	GO:0008134//transcription factor binding;GO:0043565//sequence-specific DNA binding	GO:0007005//mitochondrion organization;GO:0045944//positive regulation of transcription from RNA polymerase II promoter;GO:1900037//regulation of cellular response to hypoxia
2	BMSK0009163	3.95404	5.26138	114	1942	0.605	0.289	0.412111	2.32788e-34	3.74369e-30	up	-	ataxin-2-like protein	-	-	-	-	-	-	-
2	BMSK0013482	52.8776	104.082	114	1942	0.991	0.953	0.976996	3.84388e-34	6.18173e-30	up	-	ABN09652.1 ubiquitin-ribosomal protein S27a fusion	Genetic Information Processing	Translation	ko03010//Ribosome	K02977	GO:0005634//nucleus;GO:0005840//ribosome	GO:0003735//structural constituent of ribosome;GO:0046872//metal ion binding	GO:0006412//translation
2	BMSK0002059	43.9906	88.1832	114	1942	1	0.925	1.00331	3.97533e-34	6.39312e-30	up	RpS18	ribosomal protein S18	Genetic Information Processing	Translation	ko03010//Ribosome	K02964	GO:0005840//ribosome	GO:0003735//structural constituent of ribosome;GO:0019843//rRNA binding	GO:0006412//translation
2	BMSK0013084	53.1145	115.51	114	1942	0.982	0.945	1.12084	6.91625e-34	1.11227e-29	up	RPL26	XP 021203193.1 ribosomal protein L26 isoform X1	Genetic Information Processing	Translation	ko03010//Ribosome	K02898	GO:0015934//large ribosomal subunit	GO:0003735//structural constituent of ribosome	GO:0006412//translation
2	BMSK0012016	7.02539	20.9804	114	1942	0.719	0.689	1.57839	7.69037e-34	1.23677e-29	up	Hrb27C	hnRNPA/B-like 28 isoform X2	Genetic Information Processing	Translation	ko03015//mRNA surveillance pathway	K14411	GO:0005634//nucleus;GO:0005654//nucleoplasm;GO:0005737//cytoplasm;GO:0032991//macromolecular complex;GO:0043186//P granule;GO:1990904//ribonucleoprotein complex	GO:0003697//single-stranded DNA binding;GO:0003723//RNA binding;GO:0003729//mRNA binding;GO:0003730//mRNA 3'-UTR binding;GO:0008266//poly(U) RNA binding;GO:0034046//poly(G) binding;GO:0048027//mRNA 5'-UTR binding	GO:0007283//spermatogenesis;GO:0007319//negative regulation of oskar mRNA translation;GO:0007411//axon guidance;GO:0045451//pole plasm oskar mRNA localization;GO:0045727//positive regulation of translation;GO:0048024//regulation of mRNA splicing, via spliceosome;GO:0048026//positive regulation of mRNA splicing, via spliceosome;GO:1903688//positive regulation of border follicle cell migration
2	BMSK0011898	56.0918	157.628	114	1942	1	0.947	1.49067	1.40601e-33	2.26114e-29	up	RpS20	ribosomal protein S20	Genetic Information Processing	Translation	ko03010//Ribosome	K02969	GO:0015935//small ribosomal subunit;GO:0022627//cytosolic small ribosomal subunit	GO:0003723//RNA binding;GO:0003735//structural constituent of ribosome	GO:0002181//cytoplasmic translation;GO:0006412//translation
2	BMSK0001352	44.9402	95.3626	114	1942	0.991	0.935	1.08542	2.17588e-33	3.49925e-29	up	RpL11	ribosomal protein L11	Genetic Information Processing	Translation	ko03010//Ribosome	K02868	GO:0005730//nucleolus;GO:0005737//cytoplasm;GO:0022625//cytosolic large ribosomal subunit;GO:0022626//cytosolic ribosome	GO:0003735//structural constituent of ribosome;GO:0019843//rRNA binding	GO:0000027//ribosomal large subunit assembly;GO:0002181//cytoplasmic translation
2	BMSK0013396	5.62431	11.1808	114	1942	0.719	0.48	0.99128	2.3908e-33	3.84488e-29	up	-	XP 004932707.1 uncharacterized protein LOC101740613	-	-	-	-	-	-	-
2	BMSK0011619	43.0997	82.1307	114	1942	0.974	0.908	0.930245	5.61073e-33	9.02318e-29	up	RpS7	ribosomal protein S7	Genetic Information Processing	Translation	ko03010//Ribosome	K02993	GO:0005840//ribosome	GO:0003735//structural constituent of ribosome	GO:0006412//translation
2	809257	3.45955	7.85487	114	1942	0.544	0.387	1.183	1.34136e-32	2.15717e-28	up	ND3	-	-	-	-	-	-	-	-
2	BMSK0003283	37.3974	67.7527	114	1942	0.991	0.894	0.85734	1.41098e-32	2.26915e-28	up	RpL15	ribosomal protein L15 isoform X1	Genetic Information Processing	Translation	ko03010//Ribosome	K02877	GO:0022625//cytosolic large ribosomal subunit	GO:0003723//RNA binding;GO:0003735//structural constituent of ribosome	GO:0002181//cytoplasmic translation
2	BMSK0015133	1.04053	29.0002	114	1942	0.237	0.537	4.80067	5.8009e-32	9.329e-28	up	Pprc1	XP 012551701.1 serine/arginine-rich splicing factor 4	-	-	-	-	GO:0005634//nucleus;GO:0005654//nucleoplasm	GO:0003712//transcription cofactor activity;GO:0003723//RNA binding;GO:0008134//transcription factor binding;GO:0030374//ligand-dependent nuclear receptor transcription coactivator activity	GO:0045944//positive regulation of transcription from RNA polymerase II promoter;GO:0051091//positive regulation of sequence-specific DNA binding transcription factor activity
2	BMSK0008072	3.85279	9.11679	114	1942	0.605	0.429	1.24262	7.52027e-32	1.20941e-27	up	REPTOR-BP	cAMP-responsive element-binding protein-like 2 isoform X2	-	-	-	-	GO:0005634//nucleus;GO:0005694//chromosome	GO:0003677//DNA binding;GO:0003682//chromatin binding;GO:0003700//transcription factor activity, sequence-specific DNA binding;GO:0042803//protein homodimerization activity;GO:0046982//protein heterodimerization activity	GO:0038202//TORC1 signaling;GO:0042594//response to starvation;GO:0045893//positive regulation of transcription, DNA-templated
2	BMSK0003862	38.6103	76.361	114	1942	1	0.911	0.983849	2.07063e-31	3.32998e-27	up	RPS27	ribosomal protein S27	Genetic Information Processing	Translation	ko03010//Ribosome	K02978	GO:0005634//nucleus;GO:0014069//postsynaptic density;GO:0022627//cytosolic small ribosomal subunit	GO:0003735//structural constituent of ribosome;GO:0046872//metal ion binding	GO:0000028//ribosomal small subunit assembly;GO:0006364//rRNA processing;GO:0006412//translation
2	BMSK0004970	2.95093	4.02958	114	1942	0.544	0.264	0.449461	4.55654e-31	7.32782e-27	up	Sam-S	S-adenosylmethionine synthetase	Metabolism;Metabolism;Metabolism	Global and overview maps;Global and overview maps;Amino acid metabolism	ko01100//Metabolic pathways;ko01230//Biosynthesis of amino acids;ko00270//Cysteine and methionine metabolism	K00789;K00789;K00789	GO:0005829//cytosol	GO:0004478//methionine adenosyltransferase activity;GO:0005524//ATP binding;GO:0046872//metal ion binding	GO:0006556//S-adenosylmethionine biosynthetic process;GO:0006730//one-carbon metabolic process;GO:0008340//determination of adult lifespan
2	BMSK0011205	3.23261	5.97343	114	1942	0.561	0.335	0.885861	7.01324e-31	1.12787e-26	up	Galphao	BAD74000.1 G protein alpha subunit Go	Environmental Information Processing;Human Diseases;Organismal Systems;Human Diseases;Organismal Systems;Organismal Systems;Organismal Systems;Organismal Systems;Organismal Systems;Organismal Systems;Organismal Systems;Human Diseases;Organismal Systems;Organismal Systems;Human Diseases;Organismal Systems;Human Diseases;Organismal Systems	Signal transduction;Substance dependence;Nervous system;Infectious diseases;Endocrine system;Nervous system;Endocrine system;Environmental adaptation;Endocrine system;Nervous system;Endocrine system;Substance dependence;Nervous system;Nervous system;Infectious diseases;Nervous system;Infectious diseases;Nervous system	ko04015//Rap1 signaling pathway;ko05034//Alcoholism;ko04723//Retrograde endocannabinoid signaling;ko05163//Human cytomegalovirus infection;ko04921//Oxytocin signaling pathway;ko04728//Dopaminergic synapse;ko04915//Estrogen signaling pathway;ko04713//Circadian entrainment;ko04926//Relaxin signaling pathway;ko04724//Glutamatergic synapse;ko04916//Melanogenesis;ko05032//Morphine addiction;ko04727//G…	K04534;K04534;K04534;K04534;K04534;K04534;K04534;K04534;K04534;K04534;K04534;K04534;K04534;K04534;K04534;K04534;K04534;K04534	GO:0005834//heterotrimeric G-protein complex;GO:0005886//plasma membrane	GO:0001664//G-protein coupled receptor binding;GO:0003924//GTPase activity;GO:0005525//GTP binding;GO:0031683//G-protein beta/gamma-subunit complex binding;GO:0046872//metal ion binding	GO:0001737//establishment of imaginal disc-derived wing hair orientation;GO:0007186//G-protein coupled receptor signaling pathway;GO:0007188//adenylate cyclase-modulating G-protein coupled receptor signaling pathway;GO:0007419//ventral cord development;GO:0007507//heart development;GO:0008356//asymmetric cell division;GO:0019722//calcium-mediated signaling;GO:0019991//septate junction assembly;GO…
2	809263	10.6443	23.0137	114	1942	0.851	0.651	1.11242	2.19536e-30	3.53058e-26	up	ND1	-	-	-	-	-	-	-	-
2	BMSK0015942	46.2318	84.4992	114	1942	1	0.918	0.870054	6.82132e-30	1.097e-25	up	RPS11	AAU11818.1 ribosomal protein S11	Genetic Information Processing	Translation	ko03010//Ribosome	K02949	GO:0022627//cytosolic small ribosomal subunit	GO:0003735//structural constituent of ribosome;GO:0019843//rRNA binding	GO:0006412//translation
2	BMSK0005149	28.3513	46.9474	114	1942	0.991	0.866	0.727631	5.42154e-29	8.71891e-25	up	RpS14	40S ribosomal protein S14	Genetic Information Processing	Translation	ko03010//Ribosome	K02955	GO:0005840//ribosome	GO:0003735//structural constituent of ribosome	GO:0006412//translation
2	809265	5.88567	13.3323	114	1942	0.658	0.533	1.17964	6.49343e-29	1.04427e-24	up	ND2	-	-	-	-	-	-	-	-
2	BMSK0002491	68.312	140.392	114	1942	1	0.972	1.03925	8.14608e-29	1.31005e-24	up	RpL19	PDP protein	Genetic Information Processing	Translation	ko03010//Ribosome	K02885	GO:0022625//cytosolic large ribosomal subunit;GO:0022626//cytosolic ribosome	GO:0003723//RNA binding;GO:0003735//structural constituent of ribosome	GO:0002181//cytoplasmic translation
2	BMSK0007848	40.9553	66.6673	114	1942	1	0.9	0.702928	1.77965e-28	2.86204e-24	up	RPL21	ribosomal protein L21	Genetic Information Processing	Translation	ko03010//Ribosome	K02889	GO:0005783//endoplasmic reticulum;GO:0005829//cytosol;GO:0016020//membrane;GO:0022625//cytosolic large ribosomal subunit	GO:0003723//RNA binding;GO:0003735//structural constituent of ribosome	GO:0000184//nuclear-transcribed mRNA catabolic process, nonsense-mediated decay;GO:0006412//translation;GO:0006413//translational initiation;GO:0006614//SRP-dependent cotranslational protein targeting to membrane;GO:0019083//viral transcription
2	BMSK0015799	1.89088	2.45876	114	1942	0.412	0.154	0.378873	7.84186e-28	1.26113e-23	up	-	XP 004933537.1 uncharacterized protein LOC101744771 isoform X2	-	-	-	-	-	-	-
2	BMSK0006809	22.5091	37.6348	114	1942	0.947	0.84	0.741557	3.22854e-27	5.19214e-23	up	RpL44	ribosomal protein L36A	Genetic Information Processing	Translation	ko03010//Ribosome	K02929	GO:0005840//ribosome	GO:0003735//structural constituent of ribosome	GO:0006412//translation
2	BMSK0002817	3.4217	4.56751	114	1942	0.553	0.316	0.416694	1.09064e-26	1.75397e-22	up	eIF3-S6	ABG73409.1 eIF3-S6	Genetic Information Processing;Human Diseases	Translation;Infectious diseases	ko03013//RNA transport;ko05160//Hepatitis C	K03250;K03250	GO:0016282//eukaryotic 43S preinitiation complex;GO:0033290//eukaryotic 48S preinitiation complex;GO:0071540//eukaryotic translation initiation factor 3 complex, eIF3e	GO:0003743//translation initiation factor activity	GO:0001732//formation of cytoplasmic translation initiation complex
2	BMSK0010744	1.99848	3.99768	114	1942	0.43	0.232	1.00026	1.74697e-26	2.80948e-22	up	Akt1	XP 021205106.1 RAC serine/threonine-protein kinase	Human Diseases;Human Diseases;Environmental Information Processing;Human Diseases;Human Diseases;Human Diseases;Human Diseases;Environmental Information Processing;Environmental Information Processing;Environmental Information Processing;Organismal Systems;Environmental Information Processing;Organismal Systems;Environmental Information Processing;Cellular Processes;Environmental Information Proc…	Cancers;Infectious diseases;Signal transduction;Infectious diseases;Endocrine and metabolic diseases;Infectious diseases;Cancers;Signal transduction;Signal transduction;Signal transduction;Endocrine system;Signal transduction;Aging;Signal transduction;Transport and catabolism;Signal transduction;Cellular community - eukaryotes;Signal transduction;Infectious diseases;Infectious diseases;Cancers;En…	ko05200//Pathways in cancer;ko05165//Human papillomavirus infection;ko04024//cAMP signaling pathway;ko05166//HTLV-I infection;ko04932//Non-alcoholic fatty liver disease (NAFLD);ko05169//Epstein-Barr virus infection;ko05205//Proteoglycans in cancer;ko04151//PI3K-Akt signaling pathway;ko04010//MAPK signaling pathway;ko04014//Ras signaling pathway;ko04910//Insulin signaling pathway;ko04015//Rap1 sig…	K04456;K04456;K04456;K04456;K04456;K04456;K04456;K04456;K04456;K04456;K04456;K04456;K04456;K04456;K04456;K04456;K04456;K04456;K04456;K04456;K04456;K04456;K04456;K04456;K04456;K04456;K04456;K04456;K04456;K04456;K04456;K04456;K04456;K04456;K04456;K04456;K04456;K04456;K04456;K04456;K04456;K04456;K04456;K04456;K04456;K04456;K04456;K04456;K04456;K04456;K04456;K04456;K04456;K04456;K04456;K04456;K04456;…	GO:0005634//nucleus;GO:0005829//cytosol;GO:0005886//plasma membrane;GO:0005938//cell cortex;GO:0043025//neuronal cell body	GO:0004674//protein serine/threonine kinase activity;GO:0005524//ATP binding;GO:0035091//phosphatidylinositol binding	GO:0006468//protein phosphorylation;GO:0006629//lipid metabolic process;GO:0006915//apoptotic process;GO:0006979//response to oxidative stress;GO:0007424//open tracheal system development;GO:0007427//epithelial cell migration, open tracheal system;GO:0007520//myoblast fusion;GO:0007525//somatic muscle development;GO:0007623//circadian rhythm;GO:0008284//positive regulation of cell proliferation;G…
2	BMSK0005151	1.47465	2.54249	114	1942	0.368	0.161	0.785867	2.18018e-26	3.50616e-22	up	trr	histone-lysine N-methyltransferase 2C	Metabolism	Amino acid metabolism	ko00310//Lysine degradation	K09188	GO:0005634//nucleus;GO:0005700//polytene chromosome;GO:0005703//polytene chromosome puff;GO:0044666//MLL3/4 complex	GO:0003713//transcription coactivator activity;GO:0005102//receptor binding;GO:0042393//histone binding;GO:0042800//histone methyltransferase activity (H3-K4 specific);GO:0046872//metal ion binding	GO:0007458//progression of morphogenetic furrow involved in compound eye morphogenesis;GO:0016571//histone methylation;GO:0035075//response to ecdysone;GO:0045893//positive regulation of transcription, DNA-templated;GO:0045944//positive regulation of transcription from RNA polymerase II promoter;GO:0048749//compound eye development;GO:0051568//histone H3-K4 methylation;GO:1900114//positive regula…
2	BMSK0013483	3.00077	4.20071	114	1942	0.509	0.297	0.485301	3.85348e-26	6.19716e-22	up	Nsa2	ACM24351.1 TGF-beta-inducible nuclear protein 1	-	-	-	-	GO:0005730//nucleolus;GO:0030687//preribosome, large subunit precursor	-	GO:0006364//rRNA processing
2	BMSK0001811	1.06898	2.78517	114	1942	0.325	0.169	1.38153	3.89577e-26	6.26518e-22	up	TMEM18	transmembrane protein 18 [Papilio polytes]	-	-	-	-	GO:0005737//cytoplasm;GO:0016021//integral component of membrane;GO:0031965//nuclear membrane	GO:0003677//DNA binding	GO:0016477//cell migration
2	BMSK0012756	3.1839	6.8036	114	1942	0.518	0.395	1.0955	7.00848e-26	1.1271e-21	up	eIF3-S4	ABF51378.1 eukaryotic translation initiation factor 3 subunit 4	Genetic Information Processing	Translation	ko03013//RNA transport	K03248	GO:0005852//eukaryotic translation initiation factor 3 complex;GO:0016282//eukaryotic 43S preinitiation complex;GO:0033290//eukaryotic 48S preinitiation complex	GO:0003743//translation initiation factor activity	GO:0001732//formation of cytoplasmic translation initiation complex
2	BMSK0011897	4.30735	8.26433	114	1942	0.605	0.398	0.940097	7.21e-26	1.15951e-21	up	-	beta-tubulin	Cellular Processes;Cellular Processes;Human Diseases	Transport and catabolism;Cellular community - eukaryotes;Infectious diseases	ko04145//Phagosome;ko04540//Gap junction;ko05130//Pathogenic Escherichia coli infection	K07375;K07375;K07375	GO:0005737//cytoplasm;GO:0005874//microtubule	GO:0003924//GTPase activity;GO:0005200//structural constituent of cytoskeleton;GO:0005525//GTP binding	GO:0007017//microtubule-based process
2	BMSK0006634	1.56005	2.09712	114	1942	0.36	0.135	0.426815	1.95801e-25	3.14888e-21	up	Abp1	drebrin-like protein A [Amyelois transitella]	-	-	-	-	GO:0005856//cytoskeleton;GO:0005938//cell cortex;GO:0030424//axon;GO:0030426//growth cone;GO:0031594//neuromuscular junction;GO:0061176//type Ib terminal bouton;GO:0061177//type Is terminal bouton	GO:0001786//phosphatidylserine binding;GO:0003779//actin binding;GO:0005546//phosphatidylinositol-4,5-bisphosphate binding;GO:0005547//phosphatidylinositol-3,4,5-trisphosphate binding;GO:0051015//actin filament binding	GO:0022416//chaeta development;GO:0045887//positive regulation of synaptic growth at neuromuscular junction;GO:0072553//terminal button organization
2	BMSK0013484	4.16867	5.64113	114	1942	0.57	0.288	0.436398	3.51323e-25	5.64998e-21	up	-	XP 012549726.1 thymosin isoform X1	-	-	-	-	-	-	-
2	BMSK0008359	1.59876	4.66212	114	1942	0.368	0.28	1.54404	4.19847e-25	6.75197e-21	up	-	uncharacterized protein LOC101738399 isoform X3	-	-	-	-	-	-	-
2	BMSK0005679	1.77317	3.96594	114	1942	0.404	0.227	1.16133	4.81619e-25	7.74539e-21	up	arm	armadillo segment polarity protein isoform X1	Human Diseases;Human Diseases;Human Diseases;Human Diseases;Environmental Information Processing;Cellular Processes;Human Diseases;Human Diseases;Human Diseases;Organismal Systems;Environmental Information Processing;Environmental Information Processing;Human Diseases;Human Diseases;Human Diseases;Cellular Processes;Organismal Systems;Human Diseases;Cellular Processes;Human Diseases;Human Disease…	Cancers;Infectious diseases;Infectious diseases;Cancers;Signal transduction;Cellular community - eukaryotes;Infectious diseases;Endocrine and metabolic diseases;Cancers;Endocrine system;Signal transduction;Signal transduction;Cardiovascular diseases;Infectious diseases;Cancers;Cellular community - eukaryotes;Endocrine system;Cancers;Cellular community - eukaryotes;Cancers;Infectious diseases;Infe…	ko05200//Pathways in cancer;ko05165//Human papillomavirus infection;ko05166//HTLV-I infection;ko05205//Proteoglycans in cancer;ko04015//Rap1 signaling pathway;ko04510//Focal adhesion;ko05163//Human cytomegalovirus infection;ko04934//Cushing syndrome;ko05225//Hepatocellular carcinoma;ko04919//Thyroid hormone signaling pathway;ko04390//Hippo signaling pathway;ko04310//Wnt signaling pathway;ko05418/…	K02105;K02105;K02105;K02105;K02105;K02105;K02105;K02105;K02105;K02105;K02105;K02105;K02105;K02105;K02105;K02105;K02105;K02105;K02105;K02105;K02105;K02105;K02105;K02105;K02105;K02105;K02105;K02105	GO:0005737//cytoplasm;GO:0005913//cell-cell adherens junction;GO:0016342//catenin complex	GO:0003713//transcription coactivator activity;GO:0019903//protein phosphatase binding;GO:0035257//nuclear hormone receptor binding;GO:0045294//alpha-catenin binding;GO:0045296//cadherin binding	GO:0007155//cell adhesion;GO:0007367//segment polarity determination;GO:0016055//Wnt signaling pathway;GO:0045944//positive regulation of transcription from RNA polymerase II promoter
2	BMSK0014432	1.66435	3.60454	114	1942	0.386	0.195	1.11485	5.56774e-25	8.95404e-21	up	snrnp27	U4/U6.U5 small nuclear ribonucleoprotein 27 kDa protein	Genetic Information Processing	Transcription	ko03040//Spliceosome	K12846	GO:0005634//nucleus	-	GO:0006397//mRNA processing;GO:0008380//RNA splicing
2	BMSK0009993	1.88042	4.84896	114	1942	0.395	0.281	1.36662	6.29845e-25	1.01292e-20	up	Usp7	ubiquitin carboxyl-terminal hydrolase 7 isoform X5	Human Diseases;Human Diseases;Environmental Information Processing;Human Diseases	Infectious diseases;Cancers;Signal transduction;Infectious diseases	ko05169//Epstein-Barr virus infection;ko05203//Viral carcinogenesis;ko04068//FoxO signaling pathway;ko05168//Herpes simplex infection	K11838;K11838;K11838;K11838	GO:0005634//nucleus;GO:0005694//chromosome;GO:0005829//cytosol;GO:0016605//PML body	GO:0004197//cysteine-type endopeptidase activity;GO:0004843//thiol-dependent ubiquitin-specific protease activity;GO:0008134//transcription factor binding;GO:0042803//protein homodimerization activity;GO:0101005//ubiquitinyl hydrolase activity;GO:1990380//Lys48-specific deubiquitinase activity	GO:0006283//transcription-coupled nucleotide-excision repair;GO:0006511//ubiquitin-dependent protein catabolic process;GO:0007275//multicellular organism development;GO:0010216//maintenance of DNA methylation;GO:0016579//protein deubiquitination;GO:0031647//regulation of protein stability;GO:0035616//histone H2B conserved C-terminal lysine deubiquitination;GO:0042752//regulation of circadian rhyt…
2	BMSK0009340	1.63811	2.23878	114	1942	0.377	0.132	0.450678	6.46474e-25	1.03966e-20	up	CBX5	heterochromatin protein 1beta-like protein	-	-	-	-	GO:0000118//histone deacetylase complex;GO:0000776//kinetochore;GO:0000784//nuclear chromosome, telomeric region;GO:0005634//nucleus;GO:0005635//nuclear envelope;GO:0005654//nucleoplasm;GO:0005720//nuclear heterochromatin;GO:0005721//pericentric heterochromatin;GO:0005730//nucleolus;GO:0010369//chromocenter;GO:0017053//transcriptional repressor complex;GO:0031618//nuclear pericentric heterochroma…	GO:0003682//chromatin binding;GO:0030674//protein binding, bridging;GO:0035064//methylated histone binding;GO:0042802//identical protein binding;GO:0042803//protein homodimerization activity;GO:0042826//histone deacetylase binding;GO:0043021//ribonucleoprotein complex binding;GO:0044877//macromolecular complex binding;GO:0070491//repressing transcription factor binding	GO:0000122//negative regulation of transcription from RNA polymerase II promoter;GO:0006974//cellular response to DNA damage stimulus;GO:0007596//blood coagulation;GO:0016032//viral process;GO:0045892//negative regulation of transcription, DNA-templated;GO:0070317//negative regulation of G0 to G1 transition
2	BMSK0005808	81.059	159.743	114	1942	1	0.974	0.978711	7.40523e-25	1.19091e-20	up	RpL10	ribosomal protein L10	Genetic Information Processing	Translation	ko03010//Ribosome	K02866	GO:0005840//ribosome	GO:0003735//structural constituent of ribosome	GO:0006412//translation
2	BMSK0015618	3.07903	4.61186	114	1942	0.509	0.272	0.582875	9.69518e-25	1.55918e-20	up	-	XP 021201813.1 trithorax group protein osa	-	-	-	-	-	-	-
2	BMSK0001762	2.01883	3.9096	114	1942	0.404	0.222	0.953504	1.15476e-24	1.85708e-20	up	CTDSP1	carboxy-terminal domain R polymerase II polypeptide A small phosphatase 1 [Amyelois transitella]	-	-	-	-	GO:0005634//nucleus;GO:0005654//nucleoplasm;GO:0070062//extracellular exosome	GO:0004721//phosphoprotein phosphatase activity;GO:0008420//CTD phosphatase activity;GO:0046872//metal ion binding	GO:0001933//negative regulation of protein phosphorylation;GO:0006357//regulation of transcription from RNA polymerase II promoter;GO:0006470//protein dephosphorylation;GO:0045665//negative regulation of neuron differentiation;GO:2000134//negative regulation of G1/S transition of mitotic cell cycle
2	BMSK0008263	1.539	2.9111	114	1942	0.36	0.189	0.919574	1.2179e-24	1.95863e-20	up	CORO7	coronin-7	-	-	-	-	GO:0000139//Golgi membrane;GO:0005802//trans-Golgi network;GO:0005829//cytosol;GO:0031410//cytoplasmic vesicle	GO:0003779//actin binding	GO:0006895//Golgi to endosome transport;GO:0015031//protein transport;GO:0030041//actin filament polymerization
2	BMSK0009428	2.79838	4.99398	114	1942	0.491	0.294	0.835597	1.3008e-24	2.09195e-20	up	Chc	clathrin heavy chain	Human Diseases;Cellular Processes;Cellular Processes;Human Diseases;Organismal Systems;Organismal Systems	Neurodegenerative diseases;Transport and catabolism;Transport and catabolism;Infectious diseases;Nervous system;Excretory system	ko05016//Huntington disease;ko04144//Endocytosis;ko04142//Lysosome;ko05100//Bacterial invasion of epithelial cells;ko04721//Synaptic vesicle cycle;ko04961//Endocrine and other factor-regulated calcium reabsorption	K04646;K04646;K04646;K04646;K04646;K04646	GO:0005802//trans-Golgi network;GO:0005886//plasma membrane;GO:0005905//coated pit;GO:0005938//cell cortex;GO:0030130//clathrin coat of trans-Golgi network vesicle;GO:0030132//clathrin coat of coated pit;GO:0030136//clathrin-coated vesicle;GO:0030141//secretory granule;GO:0031410//cytoplasmic vesicle;GO:0045334//clathrin-coated endocytic vesicle;GO:0048471//perinuclear region of cytoplasm;GO:0071…	GO:0005198//structural molecule activity;GO:0032051//clathrin light chain binding	GO:0006886//intracellular protein transport;GO:0006897//endocytosis;GO:0006898//receptor-mediated endocytosis;GO:0007268//synaptic transmission;GO:0007291//sperm individualization;GO:0007594//puparial adhesion;GO:0008103//oocyte microtubule cytoskeleton polarization;GO:0010508//positive regulation of autophagy;GO:0016079//synaptic vesicle exocytosis;GO:0030198//extracellular matrix organization;G…
2	BMSK0009998	28.1444	48.6755	114	1942	0.974	0.858	0.790348	1.64935e-24	2.65249e-20	up	-	40S ribosomal protein SA isoform X1	Genetic Information Processing	Translation	ko03010//Ribosome	K02998	GO:0022627//cytosolic small ribosomal subunit	GO:0003735//structural constituent of ribosome	GO:0000028//ribosomal small subunit assembly;GO:0006412//translation
2	BMSK0006083	3.10487	4.49933	114	1942	0.518	0.298	0.535174	3.54452e-24	5.7003e-20	up	llph	protein LLP homolog	-	-	-	-	GO:0005694//chromosome;GO:0005730//nucleolus	GO:0001099//basal RNA polymerase II transcription machinery binding	GO:0060999//positive regulation of dendritic spine development;GO:0097484//dendrite extension
2	BMSK0014094	1.39058	3.82651	114	1942	0.351	0.23	1.46034	4.10575e-24	6.60288e-20	up	SSBP3	single-stranded D -binding protein 3 isoform X1	-	-	-	-	GO:0005634//nucleus;GO:0032991//macromolecular complex	GO:0000978//RNA polymerase II core promoter proximal region sequence-specific DNA binding;GO:0003697//single-stranded DNA binding	GO:0002244//hematopoietic progenitor cell differentiation;GO:0008284//positive regulation of cell proliferation;GO:0021501//prechordal plate formation;GO:0021547//midbrain-hindbrain boundary initiation;GO:0045944//positive regulation of transcription from RNA polymerase II promoter;GO:0060322//head development;GO:0060323//head morphogenesis;GO:0065003//macromolecular complex assembly;GO:2000744//…
2	BMSK0002854	1.42568	2.48885	114	1942	0.351	0.15	0.803823	4.49016e-24	7.22107e-20	up	LamC	lamin-C	Cellular Processes;Cellular Processes	Cell growth and death;Cell growth and death	ko04210//Apoptosis;ko04214//Apoptosis - fly	K07611;K07611	GO:0005638//lamin filament;GO:0005652//nuclear lamina;GO:0016020//membrane;GO:0034399//nuclear periphery;GO:0070732//spindle envelope	GO:0005198//structural molecule activity	GO:0006325//chromatin organization;GO:0006342//chromatin silencing;GO:0007112//male meiosis cytokinesis;GO:0030833//regulation of actin filament polymerization;GO:0031081//nuclear pore distribution;GO:0035989//tendon development;GO:0060415//muscle tissue morphogenesis
2	BMSK0005589	1.62282	2.39417	114	1942	0.377	0.152	0.561022	6.74755e-24	1.08514e-19	up	mys	integrin beta subunit 1 isoform X1	Human Diseases;Human Diseases;Human Diseases;Environmental Information Processing;Environmental Information Processing;Cellular Processes;Cellular Processes;Cellular Processes;Cellular Processes;Organismal Systems;Organismal Systems;Human Diseases;Human Diseases;Human Diseases;Human Diseases;Human Diseases;Human Diseases;Human Diseases;Human Diseases;Organismal Systems;Environmental Information P…	Cancers;Infectious diseases;Cancers;Signal transduction;Signal transduction;Cell motility;Cellular community - eukaryotes;Cellular community - eukaryotes;Transport and catabolism;Development;Immune system;Cardiovascular diseases;Cardiovascular diseases;Infectious diseases;Infectious diseases;Infectious diseases;Cancers;Infectious diseases;Cardiovascular diseases;Immune system;Signaling molecules …	ko05200//Pathways in cancer;ko05165//Human papillomavirus infection;ko05205//Proteoglycans in cancer;ko04151//PI3K-Akt signaling pathway;ko04015//Rap1 signaling pathway;ko04810//Regulation of actin cytoskeleton;ko04510//Focal adhesion;ko04530//Tight junction;ko04145//Phagosome;ko04360//Axon guidance;ko04611//Platelet activation;ko05414//Dilated cardiomyopathy (DCM);ko05410//Hypertrophic cardiomyo…	K05719;K05719;K05719;K05719;K05719;K05719;K05719;K05719;K05719;K05719;K05719;K05719;K05719;K05719;K05719;K05719;K05719;K05719;K05719;K05719;K05719;K05719;K05719;K05719	GO:0005886//plasma membrane;GO:0005887//integral component of plasma membrane;GO:0005925//focal adhesion;GO:0005927//muscle tendon junction;GO:0008305//integrin complex;GO:0009925//basal plasma membrane;GO:0009986//cell surface;GO:0016324//apical plasma membrane;GO:0016328//lateral plasma membrane;GO:0030425//dendrite;GO:0031252//cell leading edge;GO:0042734//presynaptic membrane;GO:0043034//cost…	GO:0005178//integrin binding;GO:0046982//protein heterodimerization activity	GO:0003344//pericardium morphogenesis;GO:0006930//substrate-dependent cell migration, cell extension;GO:0007015//actin filament organization;GO:0007157//heterophilic cell-cell adhesion via plasma membrane cell adhesion molecules;GO:0007160//cell-matrix adhesion;GO:0007229//integrin-mediated signaling pathway;GO:0007298//border follicle cell migration;GO:0007377//germ-band extension;GO:0007391//do…
2	BMSK0006057	2.49974	5.87592	114	1942	0.439	0.331	1.23304	8.29e-24	1.3332e-19	up	larp	la-related protein 1	-	-	-	-	GO:0005737//cytoplasm;GO:0005739//mitochondrion;GO:0005829//cytosol	GO:0003723//RNA binding	GO:0000001//mitochondrion inheritance;GO:0007053//spindle assembly involved in male meiosis;GO:0007140//male meiosis;GO:0035186//syncytial blastoderm mitotic cell cycle
2	BMSK0006346	1.74898	5.42007	114	1942	0.342	0.311	1.6318	8.65826e-24	1.39242e-19	up	usp10-a	ubiquitin carboxyl-terminal hydrolase 10-A	-	-	-	-	GO:0005634//nucleus;GO:0005737//cytoplasm;GO:0005769//early endosome	GO:0002039//p53 binding;GO:0004197//cysteine-type endopeptidase activity;GO:0004843//thiol-dependent ubiquitin-specific protease activity;GO:0036459//thiol-dependent ubiquitinyl hydrolase activity;GO:0044325//ion channel binding	GO:0006281//DNA repair;GO:0006511//ubiquitin-dependent protein catabolic process;GO:0006914//autophagy;GO:0006974//cellular response to DNA damage stimulus;GO:0010506//regulation of autophagy;GO:0016579//protein deubiquitination;GO:0030330//DNA damage response, signal transduction by p53 class mediator;GO:0043124//negative regulation of I-kappaB kinase/NF-kappaB signaling;GO:0071347//cellular res…
2	BMSK0008210	1.39056	1.99821	114	1942	0.325	0.125	0.523046	8.69258e-24	1.39794e-19	up	AdipoR	adiponectin receptor protein [Papilio polytes]	Human Diseases;Environmental Information Processing;Organismal Systems;Organismal Systems	Endocrine and metabolic diseases;Signal transduction;Aging;Endocrine system	ko04932//Non-alcoholic fatty liver disease (NAFLD);ko04152//AMPK signaling pathway;ko04211//Longevity regulating pathway - mammal;ko04920//Adipocytokine signaling pathway	K07297;K07297;K07297;K07297	GO:0005886//plasma membrane;GO:0016021//integral component of membrane	GO:0016500//protein-hormone receptor activity;GO:0038023//signaling receptor activity;GO:0046872//metal ion binding	GO:0009755//hormone-mediated signaling pathway;GO:0019395//fatty acid oxidation;GO:0032024//positive regulation of insulin secretion;GO:0033211//adiponectin-activated signaling pathway;GO:0036099//female germ-line stem cell population maintenance;GO:0042593//glucose homeostasis;GO:0070328//triglyceride homeostasis
2	BMSK0000744	4.70574	7.53637	114	1942	0.596	0.429	0.679447	1.27092e-23	2.0439e-19	up	Non1	nucleolar GTP-binding protein 1-like, partial	Genetic Information Processing	Translation	ko03008//Ribosome biogenesis in eukaryotes	K06943	GO:0005634//nucleus;GO:0005730//nucleolus	GO:0005525//GTP binding	GO:0042254//ribosome biogenesis;GO:0051301//cell division;GO:0090307//mitotic spindle assembly
2	BMSK0007628	1.73626	2.43452	114	1942	0.368	0.141	0.487652	1.60466e-23	2.58062e-19	up	CCT2	chaperonin containing t-complex polypeptide 1 beta subunit	-	-	-	-	GO:0002199//zona pellucida receptor complex;GO:0005832//chaperonin-containing T-complex;GO:0005874//microtubule;GO:0044297//cell body	GO:0005524//ATP binding;GO:0031625//ubiquitin protein ligase binding;GO:0044183//protein binding involved in protein folding;GO:0051082//unfolded protein binding	GO:0007339//binding of sperm to zona pellucida;GO:0032212//positive regulation of telomere maintenance via telomerase;GO:0050821//protein stabilization;GO:0051086//chaperone mediated protein folding independent of cofactor;GO:0051131//chaperone-mediated protein complex assembly;GO:0051973//positive regulation of telomerase activity;GO:0090666//scaRNA localization to Cajal body;GO:1901998//toxin t…
2	809268	8.23884	14.6753	114	1942	0.754	0.572	0.832876	1.84671e-23	2.96988e-19	up	ATP8	-	-	-	-	-	-	-	-
2	809261	3.59708	6.09013	114	1942	0.518	0.328	0.759645	1.53932e-22	2.47554e-18	up	ND6	-	-	-	-	-	-	-	-
2	BMSK0004421	1.73648	2.57625	114	1942	0.351	0.154	0.56911	1.79361e-22	2.88449e-18	up	shep	protein alan shepard isoform X3	-	-	-	-	-	GO:0003723//RNA binding	GO:0009629//response to gravity
2	BMSK0005588	2.12005	3.86436	114	1942	0.404	0.231	0.866131	2.10622e-22	3.38722e-18	up	-	kinesin heavy chain	Cellular Processes;Organismal Systems	Transport and catabolism;Nervous system	ko04144//Endocytosis;ko04728//Dopaminergic synapse	K10396;K10396	GO:0005737//cytoplasm;GO:0005874//microtubule	GO:0003777//microtubule motor activity;GO:0005524//ATP binding;GO:0008017//microtubule binding	GO:0007018//microtubule-based movement
2	BMSK0001321	38.6827	54.8186	114	1942	1	0.864	0.502979	4.3693e-22	7.02671e-18	up	RpL13A	ribosomal protein L13A	Genetic Information Processing	Translation	ko03010//Ribosome	K02872	GO:0015934//large ribosomal subunit	GO:0003735//structural constituent of ribosome	GO:0006412//translation
2	BMSK0010724	0.946175	1.2323	114	1942	0.254	0.073	0.38117	4.98927e-22	8.02374e-18	up	hyou1	hypoxia up-regulated protein 1 [Papilio polytes]	Genetic Information Processing	Folding, sorting and degradation	ko04141//Protein processing in endoplasmic reticulum	K09486	GO:0005783//endoplasmic reticulum;GO:0005788//endoplasmic reticulum lumen;GO:0034663//endoplasmic reticulum chaperone complex	GO:0005524//ATP binding	GO:0071456//cellular response to hypoxia;GO:1903298//negative regulation of hypoxia-induced intrinsic apoptotic signaling pathway
2	BMSK0007822	1.76216	2.77673	114	1942	0.386	0.18	0.656042	1.0051e-21	1.6164e-17	up	Pdcd6	apoptosis-linked protein 2	-	-	-	-	GO:0000139//Golgi membrane;GO:0005634//nucleus;GO:0005737//cytoplasm;GO:0005768//endosome;GO:0005783//endoplasmic reticulum;GO:0005789//endoplasmic reticulum membrane;GO:0030127//COPII vesicle coat;GO:0031410//cytoplasmic vesicle;GO:0031463//Cul3-RING ubiquitin ligase complex;GO:0070971//endoplasmic reticulum exit site	GO:0000287//magnesium ion binding;GO:0005509//calcium ion binding;GO:0042802//identical protein binding;GO:0042803//protein homodimerization activity;GO:0043495//protein anchor;GO:0046983//protein dimerization activity;GO:0048306//calcium-dependent protein binding;GO:0060090//binding, bridging	GO:0001525//angiogenesis;GO:0001938//positive regulation of endothelial cell proliferation;GO:0006886//intracellular protein transport;GO:0006888//ER to Golgi vesicle-mediated transport;GO:0006915//apoptotic process;GO:0006919//activation of cysteine-type endopeptidase activity involved in apoptotic process;GO:0010595//positive regulation of endothelial cell migration;GO:0014029//neural crest for…
2	BMSK0000163	1.59417	2.49771	114	1942	0.351	0.163	0.647807	1.23332e-21	1.98342e-17	up	rno	XP 012551491.1 PHD finger protein rhinoceros	-	-	-	-	GO:0005634//nucleus	GO:0046872//metal ion binding	GO:0042051//compound eye photoreceptor development;GO:0042059//negative regulation of epidermal growth factor receptor signaling pathway
2	BMSK0005152	1.75965	2.74527	114	1942	0.36	0.164	0.64166	2.67609e-21	4.30369e-17	up	Sar1b	GTP-binding protein SAR1b	Genetic Information Processing;Human Diseases	Folding, sorting and degradation;Infectious diseases	ko04141//Protein processing in endoplasmic reticulum;ko05134//Legionellosis	K07953;K07953	GO:0005783//endoplasmic reticulum;GO:0005789//endoplasmic reticulum membrane;GO:0030127//COPII vesicle coat;GO:0032580//Golgi cisterna membrane;GO:0070971//endoplasmic reticulum exit site	GO:0003924//GTPase activity;GO:0005525//GTP binding;GO:0046872//metal ion binding	GO:0003400//regulation of COPII vesicle coating;GO:0006886//intracellular protein transport;GO:0006888//ER to Golgi vesicle-mediated transport;GO:0016050//vesicle organization;GO:0061024//membrane organization;GO:0070863//positive regulation of protein exit from endoplasmic reticulum
2	BMSK0004073	1.10245	2.21195	114	1942	0.298	0.146	1.0046	3.13963e-21	5.04915e-17	up	flr	WD domain, G-beta repeat	-	-	-	-	GO:0005856//cytoskeleton;GO:0030864//cortical actin cytoskeleton;GO:0042643//actomyosin, actin portion	GO:0003779//actin binding;GO:0051015//actin filament binding	GO:0001736//establishment of planar polarity;GO:0007298//border follicle cell migration;GO:0030042//actin filament depolymerization;GO:0030833//regulation of actin filament polymerization;GO:0030834//regulation of actin filament depolymerization;GO:0030836//positive regulation of actin filament depolymerization;GO:0034316//negative regulation of Arp2/3 complex-mediated actin nucleation;GO:0035317…
2	BMSK0004275	1.63483	2.27873	114	1942	0.36	0.151	0.479096	4.55893e-21	7.33167e-17	up	SEC62	translocation protein SEC62 [Amyelois transitella]	Genetic Information Processing;Genetic Information Processing	Folding, sorting and degradation;Folding, sorting and degradation	ko04141//Protein processing in endoplasmic reticulum;ko03060//Protein export	K12275;K12275	GO:0005783//endoplasmic reticulum;GO:0005789//endoplasmic reticulum membrane;GO:0005791//rough endoplasmic reticulum;GO:0005829//cytosol;GO:0016020//membrane;GO:0016021//integral component of membrane;GO:0030176//integral component of endoplasmic reticulum membrane	GO:0008565//protein transporter activity;GO:0038023//signaling receptor activity	GO:0006613//cotranslational protein targeting to membrane;GO:0006620//posttranslational protein targeting to membrane;GO:0031204//posttranslational protein targeting to membrane, translocation
2	BMSK0010569	0.989663	1.3583	114	1942	0.281	0.096	0.456794	7.39427e-21	1.18915e-16	up	phf10	supporter of activation of yellow protein	Human Diseases	Cancers	ko05225//Hepatocellular carcinoma	K22197	GO:0000123//histone acetyltransferase complex;GO:0000790//nuclear chromatin;GO:0005634//nucleus;GO:0071564//npBAF complex	GO:0004402//histone acetyltransferase activity;GO:0042393//histone binding;GO:0046872//metal ion binding	GO:0007399//nervous system development;GO:0045892//negative regulation of transcription, DNA-templated;GO:0045944//positive regulation of transcription from RNA polymerase II promoter
2	BMSK0010922	33.988	50.5759	114	1942	0.974	0.852	0.573422	8.42066e-21	1.35421e-16	up	RpS9	ribosomal protein S9	Genetic Information Processing	Translation	ko03010//Ribosome	K02997	GO:0005730//nucleolus;GO:0005737//cytoplasm;GO:0005829//cytosol;GO:0022626//cytosolic ribosome;GO:0022627//cytosolic small ribosomal subunit	GO:0003735//structural constituent of ribosome;GO:0019843//rRNA binding	GO:0002181//cytoplasmic translation;GO:0045903//positive regulation of translational fidelity
2	BMSK0004633	39.9606	67.745	114	1942	0.991	0.924	0.761535	1.07149e-20	1.72317e-16	up	RPL27	ribosomal protein L27 isoform X1	Genetic Information Processing	Translation	ko03010//Ribosome	K02901	GO:0015934//large ribosomal subunit;GO:0022625//cytosolic large ribosomal subunit;GO:0098556//cytoplasmic side of rough endoplasmic reticulum membrane	GO:0003735//structural constituent of ribosome	GO:0006364//rRNA processing;GO:0006412//translation
2	BMSK0013081	1.88221	2.53175	114	1942	0.36	0.153	0.427709	2.00603e-20	3.2261e-16	up	-	bifunctional lysine-specific demethylase and histidyl-hydroxylase NO66 [Amyelois transitella]	-	-	-	-	GO:0005634//nucleus	GO:0005506//iron ion binding;GO:0016706//oxidoreductase activity, acting on paired donors, with incorporation or reduction of molecular oxygen, 2-oxoglutarate as one donor, and incorporation of one atom each of oxygen into both donors;GO:0032453//histone demethylase activity (H3-K4 specific);GO:0051864//histone demethylase activity (H3-K36 specific)	GO:0034720//histone H3-K4 demethylation;GO:0045892//negative regulation of transcription, DNA-templated;GO:0070544//histone H3-K36 demethylation
2	BMSK0004522	1.10406	1.6987	114	1942	0.289	0.117	0.621611	2.50957e-20	4.0359e-16	up	BCR	active breakpoint cluster region-related protein isoform X1	-	-	-	-	GO:0005829//cytosol;GO:0014069//postsynaptic density;GO:0016020//membrane;GO:0030054//cell junction;GO:0032991//macromolecular complex;GO:0045211//postsynaptic membrane;GO:0070062//extracellular exosome	GO:0004674//protein serine/threonine kinase activity;GO:0005089//Rho guanyl-nucleotide exchange factor activity;GO:0005096//GTPase activator activity;GO:0005524//ATP binding;GO:0016301//kinase activity	GO:0002692//negative regulation of cellular extravasation;GO:0003014//renal system process;GO:0006468//protein phosphorylation;GO:0007165//signal transduction;GO:0007420//brain development;GO:0030036//actin cytoskeleton organization;GO:0035023//regulation of Rho protein signal transduction;GO:0035556//intracellular signal transduction;GO:0042472//inner ear morphogenesis;GO:0043114//regulation of …
2	BMSK0011586	38.7554	56.0847	114	1942	0.991	0.856	0.533209	3.832e-20	6.16262e-16	up	RpL7	XP 021206888.1 ribosomal protein L7 isoform X1	Genetic Information Processing	Translation	ko03010//Ribosome	K02937	GO:0022625//cytosolic large ribosomal subunit;GO:0022626//cytosolic ribosome	GO:0003723//RNA binding;GO:0003735//structural constituent of ribosome	GO:0000463//maturation of LSU-rRNA from tricistronic rRNA transcript (SSU-rRNA, 5.8S rRNA, LSU-rRNA);GO:0002181//cytoplasmic translation;GO:0035073//pupariation
2	BMSK0005725	1.15276	1.72719	114	1942	0.289	0.11	0.583327	7.63992e-20	1.22865e-15	up	Ttd14	uncharacterized protein LOC106718540 [Papilio machaon]	-	-	-	-	GO:0005829//cytosol	GO:0005525//GTP binding;GO:0035091//phosphatidylinositol binding;GO:0070300//phosphatidic acid binding	GO:0015031//protein transport;GO:0045494//photoreceptor cell maintenance
2	BMSK0007630	1.28723	2.88108	114	1942	0.289	0.141	1.16234	1.2556e-19	2.01925e-15	up	HSPB1	heat shock protein hsp21.4	-	-	-	-	GO:0005622//intracellular;GO:0005634//nucleus;GO:0005737//cytoplasm;GO:0005739//mitochondrion;GO:0005819//spindle;GO:0005886//plasma membrane;GO:0030018//Z disc;GO:0043292//contractile fiber	GO:0005080//protein kinase C binding;GO:0008426//protein kinase C inhibitor activity;GO:0042802//identical protein binding;GO:0042803//protein homodimerization activity;GO:0044183//protein binding involved in protein folding	GO:0006469//negative regulation of protein kinase activity;GO:0009408//response to heat;GO:0030837//negative regulation of actin filament polymerization;GO:0032731//positive regulation of interleukin-1 beta production;GO:0042535//positive regulation of tumor necrosis factor biosynthetic process;GO:0043122//regulation of I-kappaB kinase/NF-kappaB signaling;GO:0051016//barbed-end actin filament cap…
2	BMSK0004071	1.05179	4.15329	114	1942	0.263	0.231	1.98141	1.3219e-19	2.12588e-15	up	ccnj	uncharacterized protein LOC106110164 [Papilio polytes]	-	-	-	-	GO:0005634//nucleus	-	-
2	BMSK0005938	1.4026	3.47334	114	1942	0.316	0.206	1.30821	1.43209e-19	2.30309e-15	up	Paip2b	altered inheritance of mitochondria protein 21 isoform X2	-	-	-	-	-	GO:0000900//translation repressor activity, nucleic acid binding;GO:0008143//poly(A) binding	GO:0017148//negative regulation of translation;GO:0045947//negative regulation of translational initiation
2	BMSK0008410	1.10636	2.49199	114	1942	0.281	0.139	1.17148	1.58091e-19	2.54242e-15	up	-	casein kinase 2 beta subunit	Human Diseases;Human Diseases;Genetic Information Processing;Environmental Information Processing;Cellular Processes;Human Diseases;Cellular Processes;Environmental Information Processing	Infectious diseases;Infectious diseases;Translation;Signal transduction;Cellular community - eukaryotes;Infectious diseases;Transport and catabolism;Signal transduction	ko05169//Epstein-Barr virus infection;ko05168//Herpes simplex infection;ko03008//Ribosome biogenesis in eukaryotes;ko04310//Wnt signaling pathway;ko04520//Adherens junction;ko05162//Measles;ko04137//Mitophagy - animal;ko04064//NF-kappa B signaling pathway	K03115;K03115;K03115;K03115;K03115;K03115;K03115;K03115	GO:0005956//protein kinase CK2 complex	GO:0019887//protein kinase regulator activity	GO:0016055//Wnt signaling pathway
2	BMSK0010233	1.18022	2.63945	114	1942	0.298	0.171	1.16118	2.49868e-19	4.01838e-15	up	RAC1	small G protein [Spodoptera exigua]	Human Diseases;Environmental Information Processing;Human Diseases;Human Diseases;Human Diseases;Environmental Information Processing;Environmental Information Processing;Environmental Information Processing;Environmental Information Processing;Environmental Information Processing;Cellular Processes;Cellular Processes;Cellular Processes;Organismal Systems;Human Diseases;Cellular Processes;Organis…	Cancers;Signal transduction;Endocrine and metabolic diseases;Cancers;Cancers;Signal transduction;Signal transduction;Signal transduction;Signal transduction;Signal transduction;Cell motility;Cellular community - eukaryotes;Cellular community - eukaryotes;Digestive system;Infectious diseases;Transport and catabolism;Development;Immune system;Signal transduction;Cardiovascular diseases;Nervous syst…	ko05200//Pathways in cancer;ko04024//cAMP signaling pathway;ko04932//Non-alcoholic fatty liver disease (NAFLD);ko05205//Proteoglycans in cancer;ko05203//Viral carcinogenesis;ko04151//PI3K-Akt signaling pathway;ko04010//MAPK signaling pathway;ko04014//Ras signaling pathway;ko04015//Rap1 signaling pathway;ko04013//MAPK signaling pathway - fly;ko04810//Regulation of actin cytoskeleton;ko04510//Focal…	K04392;K04392;K04392;K04392;K04392;K04392;K04392;K04392;K04392;K04392;K04392;K04392;K04392;K04392;K04392;K04392;K04392;K04392;K04392;K04392;K04392;K04392;K04392;K04392;K04392;K04392;K04392;K04392;K04392;K04392;K04392;K04392;K04392;K04392;K04392;K04392;K04392;K04392;K04392;K04392;K04392;K04392;K04392	GO:0005737//cytoplasm;GO:0005829//cytosol;GO:0005886//plasma membrane;GO:0016020//membrane;GO:0030027//lamellipodium;GO:0031410//cytoplasmic vesicle;GO:0042470//melanosome;GO:0042995//cell projection;GO:0043197//dendritic spine	GO:0003924//GTPase activity;GO:0005525//GTP binding;GO:0019901//protein kinase binding;GO:0051022//Rho GDP-dissociation inhibitor binding	GO:0001764//neuron migration;GO:0001934//positive regulation of protein phosphorylation;GO:0007266//Rho protein signal transduction;GO:0008045//motor neuron axon guidance;GO:0016477//cell migration;GO:0016601//Rac protein signal transduction;GO:0030031//cell projection assembly;GO:0030036//actin cytoskeleton organization;GO:0030334//regulation of cell migration;GO:0048870//cell motility;GO:007152…
2	BMSK0008557	0.927722	1.65078	114	1942	0.254	0.11	0.831384	4.85317e-19	7.80487e-15	up	gloF	flavone synthase I	-	-	-	-	-	GO:0046872//metal ion binding;GO:0051213//dioxygenase activity	-
2	BMSK0005970	1.10931	1.71549	114	1942	0.289	0.115	0.628963	4.87483e-19	7.8397e-15	up	MCFD2	multiple coagulation factor deficiency protein 2 homolog isoform X1	-	-	-	-	GO:0000139//Golgi membrane;GO:0005789//endoplasmic reticulum membrane;GO:0012507//ER to Golgi transport vesicle membrane;GO:0033116//endoplasmic reticulum-Golgi intermediate compartment membrane	GO:0005509//calcium ion binding	GO:0006888//ER to Golgi vesicle-mediated transport;GO:0015031//protein transport;GO:0018279//protein N-linked glycosylation via asparagine;GO:0048208//COPII vesicle coating
2	BMSK0000348	2.24514	4.79722	114	1942	0.404	0.266	1.09539	6.45777e-19	1.03854e-14	up	EIF4G3	eukaryotic translation initiation factor 4 gamma 3-like isoform X1 [Amyelois transitella]	Genetic Information Processing;Human Diseases	Translation;Cardiovascular diseases	ko03013//RNA transport;ko05416//Viral myocarditis	K03260;K03260	GO:0005829//cytosol;GO:0016281//eukaryotic translation initiation factor 4F complex	GO:0000339//RNA cap binding;GO:0003723//RNA binding;GO:0003729//mRNA binding;GO:0003743//translation initiation factor activity;GO:0008135//translation factor activity, RNA binding	GO:0006446//regulation of translational initiation
2	BMSK0013919	1.37734	2.10036	114	1942	0.289	0.113	0.608756	7.87246e-19	1.26605e-14	up	His4	Centromere kinetochore component CENP-T histone fold	Human Diseases;Human Diseases;Human Diseases	Cancers;Substance dependence;Immune diseases	ko05203//Viral carcinogenesis;ko05034//Alcoholism;ko05322//Systemic lupus erythematosus	K11254;K11254;K11254	GO:0000786//nucleosome;GO:0005634//nucleus	GO:0003677//DNA binding;GO:0046982//protein heterodimerization activity	GO:0006334//nucleosome assembly;GO:0006352//DNA-templated transcription, initiation
2	BMSK0001682	1.36599	3.11239	114	1942	0.316	0.195	1.18808	8.43099e-19	1.35587e-14	up	RAB5B	small GTP binding protein RAB5	Cellular Processes;Environmental Information Processing;Cellular Processes;Human Diseases;Organismal Systems;Human Diseases	Transport and catabolism;Signal transduction;Transport and catabolism;Infectious diseases;Excretory system;Infectious diseases	ko04144//Endocytosis;ko04014//Ras signaling pathway;ko04145//Phagosome;ko05152//Tuberculosis;ko04962//Vasopressin-regulated water reabsorption;ko05146//Amoebiasis	K07889;K07889;K07889;K07889;K07889;K07889	GO:0005622//intracellular;GO:0005768//endosome;GO:0005769//early endosome;GO:0005886//plasma membrane;GO:0016020//membrane;GO:0030139//endocytic vesicle;GO:0030667//secretory granule membrane;GO:0031901//early endosome membrane;GO:0042470//melanosome;GO:0043231//intracellular membrane-bounded organelle;GO:0070062//extracellular exosome	GO:0003924//GTPase activity;GO:0005525//GTP binding;GO:0019003//GDP binding;GO:0030742//GTP-dependent protein binding	GO:0006886//intracellular protein transport;GO:0006897//endocytosis;GO:0007032//endosome organization;GO:0019882//antigen processing and presentation;GO:0030100//regulation of endocytosis;GO:0032482//Rab protein signal transduction;GO:0043312//neutrophil degranulation;GO:0048227//plasma membrane to endosome transport
2	BMSK0000153	2.20051	3.49444	114	1942	0.404	0.233	0.667224	1.93118e-18	3.10573e-14	up	ABCF2	ATP-binding cassette sub-family F member 2 isoform X1	-	-	-	-	-	GO:0005524//ATP binding;GO:0016887//ATPase activity	-
2	BMSK0000615	1.06672	2.68964	114	1942	0.263	0.158	1.33423	2.0276e-18	3.26078e-14	up	Bap18	chromatin complexes subunit BAP18-like isoform X4	-	-	-	-	GO:0005654//nucleoplasm;GO:0005829//cytosol;GO:0016589//NURF complex;GO:0071339//MLL1 complex	GO:0003677//DNA binding	GO:0006325//chromatin organization
2	BMSK0000276	0.916376	1.93649	114	1942	0.254	0.124	1.07943	3.55679e-18	5.72003e-14	up	PDIA5	protein disulfide-isomerase A5 [Amyelois transitella]	-	-	-	-	GO:0005788//endoplasmic reticulum lumen;GO:0005789//endoplasmic reticulum membrane	GO:0003756//protein disulfide isomerase activity;GO:0015037//peptide disulfide oxidoreductase activity;GO:0016491//oxidoreductase activity	GO:0006457//protein folding;GO:0036498//IRE1-mediated unfolded protein response;GO:0045454//cell redox homeostasis;GO:0055114//oxidation-reduction process
2	BMSK0001962	1.25308	2.3137	114	1942	0.281	0.146	0.884729	3.98669e-18	6.41139e-14	up	arpc5-b	actin-related protein 2/3 complex subunit 5 [Papilio xuthus]	Cellular Processes;Cellular Processes;Organismal Systems;Human Diseases;Human Diseases;Human Diseases;Human Diseases	Transport and catabolism;Cell motility;Immune system;Infectious diseases;Infectious diseases;Infectious diseases;Infectious diseases	ko04144//Endocytosis;ko04810//Regulation of actin cytoskeleton;ko04666//Fc gamma R-mediated phagocytosis;ko05100//Bacterial invasion of epithelial cells;ko05132//Salmonella infection;ko05131//Shigellosis;ko05130//Pathogenic Escherichia coli infection	K05754;K05754;K05754;K05754;K05754;K05754;K05754	GO:0005634//nucleus;GO:0005737//cytoplasm;GO:0005885//Arp2/3 protein complex;GO:0035861//site of double-strand break;GO:0042995//cell projection	GO:0003779//actin binding	GO:0034314//Arp2/3 complex-mediated actin nucleation
2	BMSK0012808	1.21959	1.86818	114	1942	0.281	0.124	0.615235	9.19258e-18	1.47835e-13	up	ogdh	XP 021203859.1 2-oxoglutarate dehydrogenase, mitochondrial isoform X1	Metabolism;Metabolism;Metabolism;Metabolism;Metabolism	Global and overview maps;Global and overview maps;Carbohydrate metabolism;Amino acid metabolism;Amino acid metabolism	ko01100//Metabolic pathways;ko01200//Carbon metabolism;ko00020//Citrate cycle (TCA cycle);ko00310//Lysine degradation;ko00380//Tryptophan metabolism	K00164;K00164;K00164;K00164;K00164	GO:0005634//nucleus;GO:0005739//mitochondrion;GO:0005759//mitochondrial matrix;GO:0045252//oxoglutarate dehydrogenase complex	GO:0004591//oxoglutarate dehydrogenase (succinyl-transferring) activity;GO:0030976//thiamine pyrophosphate binding;GO:0046872//metal ion binding	GO:0006096//glycolytic process;GO:0006099//tricarboxylic acid cycle;GO:0006103//2-oxoglutarate metabolic process;GO:0006104//succinyl-CoA metabolic process
2	BMSK0013674	1.37414	3.85653	114	1942	0.298	0.224	1.48878	1.04367e-17	1.67843e-13	up	DEGS1	sphingolipid delta(4)-desaturase DES1 [Papilio xuthus]	Metabolism;Environmental Information Processing;Metabolism	Global and overview maps;Signal transduction;Lipid metabolism	ko01100//Metabolic pathways;ko04071//Sphingolipid signaling pathway;ko00600//Sphingolipid metabolism	K04712;K04712;K04712	GO:0005739//mitochondrion;GO:0005789//endoplasmic reticulum membrane;GO:0016021//integral component of membrane	GO:0042284//sphingolipid delta-4 desaturase activity	GO:0006633//fatty acid biosynthetic process;GO:0046513//ceramide biosynthetic process
2	BMSK0002231	1.16883	2.11962	114	1942	0.272	0.144	0.858739	1.88423e-17	3.03022e-13	up	Tm9sf2	uncharacterized protein LOC106143604 [Amyelois transitella]	-	-	-	-	GO:0010008//endosome membrane;GO:0016020//membrane;GO:0016021//integral component of membrane	-	GO:0072657//protein localization to membrane
2	BMSK0004105	1.18686	1.81249	114	1942	0.272	0.122	0.61083	2.12594e-17	3.41894e-13	up	Ras64B	ras-like protein 2	Environmental Information Processing;Human Diseases;Human Diseases;Environmental Information Processing;Environmental Information Processing;Cellular Processes;Cellular Processes;Cellular Processes;Environmental Information Processing;Environmental Information Processing;Organismal Systems;Cellular Processes	Signal transduction;Infectious diseases;Cancers;Signal transduction;Signal transduction;Transport and catabolism;Cell motility;Cell growth and death;Signal transduction;Signal transduction;Immune system;Transport and catabolism	ko04024//cAMP signaling pathway;ko05166//HTLV-I infection;ko05205//Proteoglycans in cancer;ko04010//MAPK signaling pathway;ko04014//Ras signaling pathway;ko04140//Autophagy - animal;ko04810//Regulation of actin cytoskeleton;ko04218//Cellular senescence;ko04371//Apelin signaling pathway;ko04072//Phospholipase D signaling pathway;ko04625//C-type lectin receptor signaling pathway;ko04137//Mitophagy …	K07830;K07830;K07830;K07830;K07830;K07830;K07830;K07830;K07830;K07830;K07830;K07830	GO:0005886//plasma membrane	GO:0003924//GTPase activity;GO:0005525//GTP binding	GO:0007265//Ras protein signal transduction
2	BMSK0008300	41.928	61.3516	114	1942	0.982	0.899	0.549189	8.13974e-17	1.30903e-12	up	RpS3	ribosomal protein S3	Genetic Information Processing	Translation	ko03010//Ribosome	K02985	GO:0015935//small ribosomal subunit	GO:0003723//RNA binding;GO:0003735//structural constituent of ribosome	GO:0006412//translation
2	BMSK0004953	37.571	56.9699	114	1942	0.974	0.878	0.600581	1.77468e-16	2.85404e-12	up	RpL24	ribosomal protein L24	Genetic Information Processing	Translation	ko03010//Ribosome	K02896	GO:0005840//ribosome	-	-
2	BMSK0015536	1.61109	2.59145	114	1942	0.342	0.183	0.685724	1.96723e-16	3.16371e-12	up	-	XP 012553331.1 uncharacterized protein LOC101742438	-	-	-	-	-	-	-
2	BMSK0001123	1.10521	1.56811	114	1942	0.272	0.111	0.5047	5.76433e-16	9.2702e-12	up	Zfand4	AN1-type zinc finger protein 4	-	-	-	-	-	GO:0008270//zinc ion binding	-
2	BMSK0013847	1.23982	2.08279	114	1942	0.272	0.141	0.74839	1.03352e-15	1.66211e-11	up	TMX1	thioredoxin-related transmembrane protein 1-like	-	-	-	-	GO:0005789//endoplasmic reticulum membrane;GO:0016021//integral component of membrane	GO:0015036//disulfide oxidoreductase activity	GO:0034976//response to endoplasmic reticulum stress;GO:0045454//cell redox homeostasis
2	BMSK0008453	32.5322	43.5519	114	1942	0.982	0.861	0.42087	1.54548e-15	2.48544e-11	up	RpL7A	ribosomal protein L7A	Genetic Information Processing	Translation	ko03010//Ribosome	K02936	GO:0022625//cytosolic large ribosomal subunit;GO:0022626//cytosolic ribosome	GO:0003723//RNA binding;GO:0003735//structural constituent of ribosome	GO:0000470//maturation of LSU-rRNA;GO:0002181//cytoplasmic translation
2	BMSK0008672	1.32424	2.26554	114	1942	0.272	0.134	0.774688	3.19388e-15	5.1364e-11	up	wos2	uncharacterized protein CG16817-like	Metabolism;Metabolism	Global and overview maps;Lipid metabolism	ko01100//Metabolic pathways;ko00590//Arachidonic acid metabolism	K15730;K15730	GO:0005634//nucleus;GO:0005737//cytoplasm;GO:0005829//cytosol	GO:0051087//chaperone binding;GO:0051879//Hsp90 protein binding	GO:0006457//protein folding;GO:0007049//cell cycle;GO:0032212//positive regulation of telomere maintenance via telomerase;GO:0051131//chaperone-mediated protein complex assembly
2	BMSK0013430	1.21846	2.76945	114	1942	0.254	0.165	1.18454	4.88181e-15	7.85093e-11	up	AHSA1	activator of 90 kDa heat shock protein ATPase homolog 1	-	-	-	-	GO:0005783//endoplasmic reticulum;GO:0005829//cytosol;GO:0070062//extracellular exosome	GO:0001671//ATPase activator activity;GO:0045296//cadherin binding;GO:0051087//chaperone binding;GO:0051879//Hsp90 protein binding	GO:0032781//positive regulation of ATPase activity
2	BMSK0006602	1.82408	2.5369	114	1942	0.333	0.174	0.475898	6.62559e-15	1.06553e-10	up	-	serrate R effector molecule homolog [Amyelois transitella]	-	-	-	-	-	-	-
2	BMSK0010254	39.529	56.0884	114	1942	0.982	0.832	0.504789	1.41959e-14	2.28298e-10	up	RPL22	ribosomal protein L22	Genetic Information Processing	Translation	ko03010//Ribosome	K02891	GO:0005840//ribosome	GO:0003735//structural constituent of ribosome	GO:0006412//translation
2	BMSK0012993	54.6694	77.6286	114	1942	1	0.921	0.505853	1.46947e-14	2.3632e-10	up	RpS4	RS4 BOMMO RecName: Full=40S ribosomal protein S4	Genetic Information Processing	Translation	ko03010//Ribosome	K02987	GO:0005840//ribosome	GO:0003735//structural constituent of ribosome;GO:0019843//rRNA binding	GO:0006412//translation
2	BMSK0008889	60.3718	87.197	114	1942	1	0.927	0.530404	2.02035e-14	3.24913e-10	up	RpS8	ribosomal protein S8	Genetic Information Processing	Translation	ko03010//Ribosome	K02995	GO:0005840//ribosome	GO:0003735//structural constituent of ribosome	GO:0006412//translation
2	BMSK0000895	36.7505	47.9945	114	1942	0.982	0.848	0.385103	3.73442e-14	6.0057e-10	up	RpL23-B,RpL23-A,RpL23-C	60S ribosomal protein L23 [Papilio polytes]	Genetic Information Processing	Translation	ko03010//Ribosome	K02894	GO:0005840//ribosome	GO:0003735//structural constituent of ribosome	GO:0006412//translation
2	809266	227.808	448.141	114	1942	1	0.989	0.976136	6.32323e-14	1.0169e-09	up	COX1	-	-	-	-	-	-	-	-
2	BMSK0009358	1.23492	1.8654	114	1942	0.272	0.133	0.595063	6.45436e-14	1.03799e-09	up	2021-09-01	septin	Human Diseases	Infectious diseases	ko05100//Bacterial invasion of epithelial cells	K16942	GO:0005940//septin ring;GO:0015630//microtubule cytoskeleton;GO:0031105//septin complex	GO:0003924//GTPase activity;GO:0005525//GTP binding;GO:0031625//ubiquitin protein ligase binding;GO:0032947//protein complex scaffold;GO:0042803//protein homodimerization activity	GO:0000281//mitotic cytokinesis;GO:0007349//cellularization;GO:0043065//positive regulation of apoptotic process;GO:0061640//cytoskeleton-dependent cytokinesis
2	BMSK0006327	38.4683	49.5402	114	1942	0.982	0.846	0.364928	3.2845e-13	5.28214e-09	up	RpL18	60S ribosomal protein L18	Genetic Information Processing	Translation	ko03010//Ribosome	K02883	GO:0005840//ribosome	GO:0003735//structural constituent of ribosome	GO:0006412//translation
2	BMSK0012072	48.8439	72.1801	114	1942	0.991	0.91	0.563424	4.43734e-13	7.13612e-09	up	RpS17	ribosomal protein S17	Genetic Information Processing	Translation	ko03010//Ribosome	K02962	GO:0005840//ribosome	GO:0003735//structural constituent of ribosome	GO:0006412//translation
2	BMSK0009992	0.254093	13.5477	114	1942	0.044	0.271	5.73655	1.28385e-11	2.0647e-07	up	-	-	-	-	-	-	-	-	-
2	BMSK0014801	4.25202	5.46616	114	1942	0.421	0.291	0.36238	2.14561e-11	3.45057e-07	up	-	trichohyalin-like	-	-	-	-	-	-	-
2	BMSK0012104	47.1465	63.9579	114	1942	0.991	0.908	0.439972	3.29008e-11	5.29111e-07	up	RpS6	ribosomal protein S6	Organismal Systems;Genetic Information Processing;Human Diseases;Environmental Information Processing;Organismal Systems;Environmental Information Processing;Environmental Information Processing;Environmental Information Processing;Human Diseases	Environmental adaptation;Translation;Cancers;Signal transduction;Endocrine system;Signal transduction;Signal transduction;Signal transduction;Drug resistance	ko04714//Thermogenesis;ko03010//Ribosome;ko05205//Proteoglycans in cancer;ko04151//PI3K-Akt signaling pathway;ko04910//Insulin signaling pathway;ko04150//mTOR signaling pathway;ko04371//Apelin signaling pathway;ko04066//HIF-1 signaling pathway;ko01521//EGFR tyrosine kinase inhibitor resistance	K02991;K02991;K02991;K02991;K02991;K02991;K02991;K02991;K02991	GO:0005840//ribosome	GO:0003735//structural constituent of ribosome	GO:0006412//translation
2	809262	53.4375	73.5961	114	1942	1	0.925	0.461776	1.70123e-08	0.000273592	up	CYTB	-	-	-	-	-	-	-	-
2	809269	165.814	262.563	114	1942	1	0.982	0.6631	2.73114e-07	0.00439223	up	ATP6	-	-	-	-	-	-	-	-
											156
Cluster	GeneID	CK	BmNPV	cells.1	cells.2	pct.1	pct.2	log2FC	p_value	p_val_adjust	significance	Symbol	Description	KEGG_A_class	KEGG_B_class	Pathway	K_ID	GO Component	GO Function	GO Process
2	BMSK0009085	174.859	1.02668	114	1942	1	0.051	-7.41207	5.71844e-183	9.19639e-179	down	-	pro-phenol oxidase [Bombyx mandarina]	-	-	-	-	GO:0005576//extracellular region	GO:0004503//monophenol monooxygenase activity;GO:0046872//metal ion binding	GO:0006583//melanin biosynthetic process from tyrosine;GO:0006952//defense response
2	BMSK0009475	173.788	0.615768	114	1942	1	0.033	-8.14073	2.32377e-182	3.73709e-178	down	-	PRP2 BOMMO RecName: Full=Phenoloxidase subunit 2; AltName: Full=PO 2; AltName: Full=Tyrosinase 2; Flags: Precursor	-	-	-	-	GO:0005576//extracellular region	GO:0004503//monophenol monooxygenase activity;GO:0046872//metal ion binding	GO:0006583//melanin biosynthetic process from tyrosine;GO:0006952//defense response
2	BMSK0014159	26.3197	0.0425252	114	1942	1	0.003	-9.27361	2.56716e-182	4.1285e-178	down	21G1	AFC87819.1 30K protein 21	-	-	-	-	GO:0005576//extracellular region	-	-
2	BMSK0002915	101.814	0.209945	114	1942	0.991	0.01	-8.92171	6.19956e-177	9.97013e-173	down	atl	atlastin	-	-	-	-	GO:0000139//Golgi membrane;GO:0005737//cytoplasm;GO:0005783//endoplasmic reticulum;GO:0005794//Golgi apparatus;GO:0012505//endomembrane system;GO:0016020//membrane;GO:0016021//integral component of membrane;GO:0031227//intrinsic component of endoplasmic reticulum membrane	GO:0003924//GTPase activity;GO:0005525//GTP binding;GO:0032561//guanyl ribonucleotide binding;GO:0042802//identical protein binding;GO:0042803//protein homodimerization activity	GO:0007019//microtubule depolymerization;GO:0007029//endoplasmic reticulum organization;GO:0007030//Golgi organization;GO:0007517//muscle organ development;GO:0007528//neuromuscular junction development;GO:0008582//regulation of synaptic growth at neuromuscular junction;GO:0016320//endoplasmic reticulum membrane fusion;GO:0031114//regulation of microtubule depolymerization;GO:0048691//positive re…
2	BMSK0013765	35.7703	0.00966103	114	1942	0.965	0.001	-11.8543	1.00236e-176	1.61199e-172	down	21G1	AFC87817.1 30K protein 19	-	-	-	-	GO:0005576//extracellular region	-	-
2	BMSK0013101	28.367	0.132623	114	1942	0.991	0.004	-7.74074	1.78861e-176	2.87645e-172	down	Acy1	aminoacylase	Metabolism;Metabolism;Metabolism;Metabolism	Global and overview maps;Global and overview maps;Amino acid metabolism;Global and overview maps	ko01100//Metabolic pathways;ko01230//Biosynthesis of amino acids;ko00220//Arginine biosynthesis;ko01210//2-Oxocarboxylic acid metabolism	K14677;K14677;K14677;K14677	GO:0005737//cytoplasm;GO:0070062//extracellular exosome	GO:0004046//aminoacylase activity;GO:0008237//metallopeptidase activity;GO:0042802//identical protein binding;GO:0046872//metal ion binding	GO:0006520//cellular amino acid metabolic process
2	BMSK0002971	27.869	0.0109569	114	1942	0.965	0.001	-11.3126	3.02073e-175	4.85794e-171	down	atl	atlastin	-	-	-	-	GO:0000139//Golgi membrane;GO:0005737//cytoplasm;GO:0005783//endoplasmic reticulum;GO:0005794//Golgi apparatus;GO:0012505//endomembrane system;GO:0016020//membrane;GO:0016021//integral component of membrane;GO:0031227//intrinsic component of endoplasmic reticulum membrane	GO:0003924//GTPase activity;GO:0005525//GTP binding;GO:0032561//guanyl ribonucleotide binding;GO:0042802//identical protein binding;GO:0042803//protein homodimerization activity	GO:0007019//microtubule depolymerization;GO:0007029//endoplasmic reticulum organization;GO:0007030//Golgi organization;GO:0007517//muscle organ development;GO:0007528//neuromuscular junction development;GO:0008582//regulation of synaptic growth at neuromuscular junction;GO:0016320//endoplasmic reticulum membrane fusion;GO:0031114//regulation of microtubule depolymerization;GO:0048691//positive re…
2	BMSK0003118	156.421	2.03298	114	1942	1	0.125	-6.2657	1.29647e-170	2.08498e-166	down	ost-1	secreted protein acidic and rich in cysteine	-	-	-	-	GO:0005604//basement membrane;GO:0005615//extracellular space	GO:0005509//calcium ion binding;GO:0005518//collagen binding;GO:0050840//extracellular matrix binding	GO:0007275//multicellular organism development
2	BMSK0003871	55.4718	0.197234	114	1942	0.991	0.015	-8.1357	2.81249e-167	4.52305e-163	down	hyi	hydroxypyruvate isomerase	Metabolism;Metabolism	Global and overview maps;Carbohydrate metabolism	ko01100//Metabolic pathways;ko00630//Glyoxylate and dicarboxylate metabolism	K01816;K01816	-	GO:0008903//hydroxypyruvate isomerase activity;GO:0016857//racemase and epimerase activity, acting on carbohydrates and derivatives	-
2	BMSK0007290	14.3107	0.293831	114	1942	0.947	0.021	-5.60596	2.31716e-136	3.72646e-132	down	Srm	spermidine synthase	Metabolism;Metabolism;Metabolism;Metabolism;Metabolism	Global and overview maps;Metabolism of other amino acids;Amino acid metabolism;Amino acid metabolism;Metabolism of other amino acids	ko01100//Metabolic pathways;ko00480//Glutathione metabolism;ko00270//Cysteine and methionine metabolism;ko00330//Arginine and proline metabolism;ko00410//beta-Alanine metabolism	K00797;K00797;K00797;K00797;K00797	-	GO:0004766//spermidine synthase activity;GO:0042802//identical protein binding;GO:0042803//protein homodimerization activity	GO:0006596//polyamine biosynthetic process;GO:0008295//spermidine biosynthetic process;GO:1990830//cellular response to leukemia inhibitory factor
2	BMSK0003908	85.3094	0.889754	114	1942	0.939	0.057	-6.58315	1.34569e-134	2.16415e-130	down	-	hemocyte protease-1	-	-	-	-	GO:0005576//extracellular region;GO:0030133//transport vesicle	GO:0004252//serine-type endopeptidase activity;GO:0046872//metal ion binding	GO:0042381//hemolymph coagulation
2	BMSK0010790	23.3946	0.467925	114	1942	0.965	0.032	-5.64375	5.09469e-134	8.19328e-130	down	FH	Fumarase C C-terminus	-	-	-	-	GO:0005737//cytoplasm;GO:0005739//mitochondrion;GO:0005759//mitochondrial matrix;GO:0045239//tricarboxylic acid cycle enzyme complex;GO:0070062//extracellular exosome	GO:0004333//fumarate hydratase activity	GO:0006099//tricarboxylic acid cycle;GO:0006106//fumarate metabolic process;GO:0006108//malate metabolic process;GO:0048873//homeostasis of number of cells within a tissue
2	BMSK0009246	18.3431	0.412328	114	1942	0.965	0.029	-5.4753	5.16318e-134	8.30343e-130	down	BLMH	bleomycin hydrolase isoform X1 [Amyelois transitella]	-	-	-	-	GO:0005634//nucleus;GO:0005737//cytoplasm;GO:0005829//cytosol;GO:0070062//extracellular exosome	GO:0004177//aminopeptidase activity;GO:0004180//carboxypeptidase activity;GO:0004197//cysteine-type endopeptidase activity;GO:0008234//cysteine-type peptidase activity;GO:0042802//identical protein binding	GO:0000209//protein polyubiquitination;GO:0006508//proteolysis;GO:0009636//response to toxic substance;GO:0042493//response to drug;GO:0043418//homocysteine catabolic process
2	BMSK0003260	72.2985	0.62198	114	1942	0.904	0.042	-6.86095	4.95662e-131	7.97124e-127	down	NLGN1	carboxylesterase clade H, member 1 precursor	-	-	-	-	GO:0005794//Golgi apparatus;GO:0005886//plasma membrane;GO:0005887//integral component of plasma membrane;GO:0009897//external side of plasma membrane;GO:0009986//cell surface;GO:0014069//postsynaptic density;GO:0017146//NMDA selective glutamate receptor complex;GO:0030054//cell junction;GO:0030425//dendrite;GO:0032433//filopodium tip;GO:0043197//dendritic spine;GO:0043198//dendritic shaft;GO:004…	GO:0001540//beta-amyloid binding;GO:0030165//PDZ domain binding;GO:0038023//signaling receptor activity;GO:0042043//neurexin family protein binding;GO:0046983//protein dimerization activity;GO:0050839//cell adhesion molecule binding;GO:0097110//scaffold protein binding	GO:0002087//regulation of respiratory gaseous exchange by neurological system process;GO:0006605//protein targeting;GO:0007157//heterophilic cell-cell adhesion via plasma membrane cell adhesion molecules;GO:0007158//neuron cell-cell adhesion;GO:0007399//nervous system development;GO:0007416//synapse assembly;GO:0010841//positive regulation of circadian sleep/wake cycle, wakefulness;GO:0016080//sy…
2	BMSK0014489	17.1274	0.319933	114	1942	0.921	0.021	-5.74239	1.00123e-129	1.61017e-125	down	SLC31A1	copper transporter	Human Diseases;Organismal Systems	Drug resistance;Digestive system	ko01524//Platinum drug resistance;ko04978//Mineral absorption	K14686;K14686	GO:0005770//late endosome;GO:0005886//plasma membrane;GO:0005887//integral component of plasma membrane;GO:0043025//neuronal cell body;GO:0055037//recycling endosome	GO:0005375//copper ion transmembrane transporter activity;GO:0042802//identical protein binding	GO:0006825//copper ion transport;GO:0006855//drug transmembrane transport;GO:0006878//cellular copper ion homeostasis;GO:0072719//cellular response to cisplatin;GO:0098705//copper ion import across plasma membrane
2	BMSK0001981	81.4763	0.8032	114	1942	0.895	0.057	-6.66448	4.26161e-129	6.85353e-125	down	-	collagen alpha-1(IV) chain [Papilio xuthus]	Human Diseases;Human Diseases;Environmental Information Processing;Cellular Processes;Organismal Systems;Organismal Systems;Human Diseases;Human Diseases;Human Diseases;Environmental Information Processing	Cancers;Infectious diseases;Signal transduction;Cellular community - eukaryotes;Digestive system;Endocrine system;Cancers;Endocrine and metabolic diseases;Infectious diseases;Signaling molecules and interaction	ko05200//Pathways in cancer;ko05165//Human papillomavirus infection;ko04151//PI3K-Akt signaling pathway;ko04510//Focal adhesion;ko04974//Protein digestion and absorption;ko04926//Relaxin signaling pathway;ko05222//Small cell lung cancer;ko04933//AGE-RAGE signaling pathway in diabetic complications;ko05146//Amoebiasis;ko04512//ECM-receptor interaction	K06237;K06237;K06237;K06237;K06237;K06237;K06237;K06237;K06237;K06237	GO:0005581//collagen trimer;GO:0005604//basement membrane	GO:0005201//extracellular matrix structural constituent	-
2	BMSK0003272	12.2131	0.142913	114	1942	0.842	0.01	-6.41715	2.60131e-125	4.18343e-121	down	ME1	malate dehydrogenase isoform X1	Metabolism;Metabolism;Organismal Systems;Metabolism	Global and overview maps;Global and overview maps;Endocrine system;Carbohydrate metabolism	ko01100//Metabolic pathways;ko01200//Carbon metabolism;ko03320//PPAR signaling pathway;ko00620//Pyruvate metabolism	K00029;K00029;K00029;K00029	GO:0005737//cytoplasm	GO:0004471//malate dehydrogenase (decarboxylating) (NAD+) activity;GO:0004473//malate dehydrogenase (decarboxylating) (NADP+) activity;GO:0008948//oxaloacetate decarboxylase activity;GO:0046872//metal ion binding;GO:0051287//NAD binding	-
2	BMSK0001980	63.3019	1.51917	114	1942	0.956	0.093	-5.38089	1.77103e-124	2.84816e-120	down	COL4A5	collagen alpha-2(IV) chain	Human Diseases;Human Diseases;Environmental Information Processing;Cellular Processes;Organismal Systems;Organismal Systems;Human Diseases;Human Diseases;Human Diseases;Environmental Information Processing	Cancers;Infectious diseases;Signal transduction;Cellular community - eukaryotes;Digestive system;Endocrine system;Cancers;Endocrine and metabolic diseases;Infectious diseases;Signaling molecules and interaction	ko05200//Pathways in cancer;ko05165//Human papillomavirus infection;ko04151//PI3K-Akt signaling pathway;ko04510//Focal adhesion;ko04974//Protein digestion and absorption;ko04926//Relaxin signaling pathway;ko05222//Small cell lung cancer;ko04933//AGE-RAGE signaling pathway in diabetic complications;ko05146//Amoebiasis;ko04512//ECM-receptor interaction	K06237;K06237;K06237;K06237;K06237;K06237;K06237;K06237;K06237;K06237	GO:0005576//extracellular region;GO:0005587//collagen type IV trimer;GO:0005615//extracellular space;GO:0005788//endoplasmic reticulum lumen;GO:0031012//extracellular matrix;GO:0031594//neuromuscular junction	GO:0005201//extracellular matrix structural constituent;GO:0030020//extracellular matrix structural constituent conferring tensile strength	GO:0007528//neuromuscular junction development;GO:0030198//extracellular matrix organization;GO:0038063//collagen-activated tyrosine kinase receptor signaling pathway
2	BMSK0014158	9.1996	0.0314893	114	1942	0.737	0.002	-8.19057	5.19719e-119	8.35813e-115	down	19G1	XP 004926353.1 microvitellogenin	-	-	-	-	GO:0005576//extracellular region	-	-
2	BMSK0012537	12.0551	0.435889	114	1942	0.877	0.023	-4.78954	8.27409e-118	1.33064e-113	down	-	27 kDa glycoprotein precursor	-	-	-	-	GO:0005576//extracellular region	-	-
2	BMSK0015652	15.1314	0.17803	114	1942	0.807	0.012	-6.40928	1.21001e-115	1.94593e-111	down	Malrd1	scavenger receptor type C precursor	-	-	-	-	GO:0005737//cytoplasm;GO:0005794//Golgi apparatus;GO:0016021//integral component of membrane;GO:0030659//cytoplasmic vesicle membrane	-	GO:0042632//cholesterol homeostasis;GO:0070858//negative regulation of bile acid biosynthetic process
2	BMSK0015870	9.62631	0.0650611	114	1942	0.728	0.004	-7.20904	2.91911e-112	4.69452e-108	down	-	-	-	-	-	-	-	-	-
2	BMSK0015667	75.0905	5.94485	114	1942	1	0.262	-3.65892	2.1754e-109	3.49849e-105	down	Hsp83	heat shock protein 83	Human Diseases;Genetic Information Processing;Environmental Information Processing;Organismal Systems;Human Diseases;Organismal Systems;Human Diseases;Cellular Processes;Organismal Systems;Organismal Systems;Organismal Systems;Organismal Systems	Cancers;Folding, sorting and degradation;Signal transduction;Endocrine system;Cardiovascular diseases;Endocrine system;Cancers;Cell growth and death;Immune system;Immune system;Immune system;Immune system	ko05200//Pathways in cancer;ko04141//Protein processing in endoplasmic reticulum;ko04151//PI3K-Akt signaling pathway;ko04915//Estrogen signaling pathway;ko05418//Fluid shear stress and atherosclerosis;ko04914//Progesterone-mediated oocyte maturation;ko05215//Prostate cancer;ko04217//Necroptosis;ko04621//NOD-like receptor signaling pathway;ko04612//Antigen processing and presentation;ko04657//IL-1…	K04079;K04079;K04079;K04079;K04079;K04079;K04079;K04079;K04079;K04079;K04079;K04079	GO:0005737//cytoplasm	GO:0005524//ATP binding;GO:0051082//unfolded protein binding	GO:0006457//protein folding
2	BMSK0007560	19.163	0.388267	114	1942	0.825	0.021	-5.62513	1.58018e-108	2.54124e-104	down	LanB1	laminin subunit beta-1	Human Diseases;Human Diseases;Environmental Information Processing;Cellular Processes;Human Diseases;Human Diseases;Human Diseases;Environmental Information Processing	Cancers;Infectious diseases;Signal transduction;Cellular community - eukaryotes;Infectious diseases;Cancers;Infectious diseases;Signaling molecules and interaction	ko05200//Pathways in cancer;ko05165//Human papillomavirus infection;ko04151//PI3K-Akt signaling pathway;ko04510//Focal adhesion;ko05145//Toxoplasmosis;ko05222//Small cell lung cancer;ko05146//Amoebiasis;ko04512//ECM-receptor interaction	K05636;K05636;K05636;K05636;K05636;K05636;K05636;K05636	GO:0005604//basement membrane	-	GO:0003143//embryonic heart tube morphogenesis;GO:0008406//gonad development;GO:0016477//cell migration;GO:0030198//extracellular matrix organization;GO:0033627//cell adhesion mediated by integrin;GO:0034446//substrate adhesion-dependent cell spreading;GO:0045089//positive regulation of innate immune response;GO:0048513//animal organ development;GO:0050829//defense response to Gram-negative bacte…
2	BMSK0005300	12.001	0.0761715	114	1942	0.719	0.005	-7.29969	2.86093e-107	4.60095e-103	down	-	Hemocytin [Papilio machaon]	-	-	-	-	-	GO:0030246//carbohydrate binding	GO:0007155//cell adhesion
2	BMSK0002916	6.50998	0.0163926	114	1942	0.675	0.002	-8.63347	1.19458e-106	1.92112e-102	down	atl	atlastin	-	-	-	-	GO:0000139//Golgi membrane;GO:0005737//cytoplasm;GO:0005783//endoplasmic reticulum;GO:0005794//Golgi apparatus;GO:0012505//endomembrane system;GO:0016020//membrane;GO:0016021//integral component of membrane;GO:0031227//intrinsic component of endoplasmic reticulum membrane	GO:0003924//GTPase activity;GO:0005525//GTP binding;GO:0032561//guanyl ribonucleotide binding;GO:0042802//identical protein binding;GO:0042803//protein homodimerization activity	GO:0007019//microtubule depolymerization;GO:0007029//endoplasmic reticulum organization;GO:0007030//Golgi organization;GO:0007517//muscle organ development;GO:0007528//neuromuscular junction development;GO:0008582//regulation of synaptic growth at neuromuscular junction;GO:0016320//endoplasmic reticulum membrane fusion;GO:0031114//regulation of microtubule depolymerization;GO:0048691//positive re…
2	BMSK0010792	5.23816	0.0574679	114	1942	0.649	0.001	-6.51016	2.7783e-105	4.46807e-101	down	FH	fumarate hydratase, mitochondrial-like [Papilio polytes]	Metabolism;Human Diseases;Metabolism;Human Diseases;Metabolism;Human Diseases;Metabolism	Global and overview maps;Cancers;Global and overview maps;Endocrine and metabolic diseases;Carbohydrate metabolism;Cancers;Carbohydrate metabolism	ko01100//Metabolic pathways;ko05200//Pathways in cancer;ko01200//Carbon metabolism;ko04934//Cushing syndrome;ko00020//Citrate cycle (TCA cycle);ko05211//Renal cell carcinoma;ko00620//Pyruvate metabolism	K01679;K01679;K01679;K01679;K01679;K01679;K01679	GO:0005739//mitochondrion;GO:0045239//tricarboxylic acid cycle enzyme complex	GO:0004333//fumarate hydratase activity	GO:0006099//tricarboxylic acid cycle;GO:0006106//fumarate metabolic process;GO:0006108//malate metabolic process
2	BMSK0012472	5.9345	0.404772	114	1942	0.763	0.023	-3.87395	1.0151e-99	1.63248e-95	down	eIF4E1	ABL75549.1 eukaryotic initiation factor 4E-1	Genetic Information Processing;Environmental Information Processing;Organismal Systems;Environmental Information Processing;Organismal Systems;Environmental Information Processing;Human Diseases	Translation;Signal transduction;Endocrine system;Signal transduction;Aging;Signal transduction;Drug resistance	ko03013//RNA transport;ko04151//PI3K-Akt signaling pathway;ko04910//Insulin signaling pathway;ko04150//mTOR signaling pathway;ko04211//Longevity regulating pathway - mammal;ko04066//HIF-1 signaling pathway;ko01521//EGFR tyrosine kinase inhibitor resistance	K03259;K03259;K03259;K03259;K03259;K03259;K03259	GO:0000932//cytoplasmic mRNA processing body;GO:0005737//cytoplasm;GO:0005829//cytosol;GO:0005845//mRNA cap binding complex;GO:0016281//eukaryotic translation initiation factor 4F complex;GO:0031594//neuromuscular junction;GO:0071598//neuronal ribonucleoprotein granule;GO:0097482//muscle cell postsynaptic density;GO:0098794//postsynapse;GO:1990124//messenger ribonucleoprotein complex	GO:0000339//RNA cap binding;GO:0000340//RNA 7-methylguanosine cap binding;GO:0003743//translation initiation factor activity;GO:0031370//eukaryotic initiation factor 4G binding;GO:0045182//translation regulator activity	GO:0000278//mitotic cell cycle;GO:0001558//regulation of cell growth;GO:0002191//cap-dependent translational initiation;GO:0006325//chromatin organization;GO:0006412//translation;GO:0006413//translational initiation;GO:0007060//male meiosis chromosome segregation;GO:0007076//mitotic chromosome condensation;GO:0007112//male meiosis cytokinesis;GO:0010032//meiotic chromosome condensation;GO:0016070…
2	BMSK0010120	12.3907	0.273608	114	1942	0.702	0.009	-5.50101	2.50995e-98	4.0365e-94	down	Ctsb	cathepsin B precursor	Cellular Processes;Cellular Processes;Cellular Processes;Organismal Systems;Organismal Systems;Organismal Systems	Transport and catabolism;Transport and catabolism;Cell growth and death;Immune system;Endocrine system;Immune system	ko04142//Lysosome;ko04140//Autophagy - animal;ko04210//Apoptosis;ko04621//NOD-like receptor signaling pathway;ko04924//Renin secretion;ko04612//Antigen processing and presentation	K01363;K01363;K01363;K01363;K01363;K01363	GO:0005576//extracellular region;GO:0005615//extracellular space;GO:0005737//cytoplasm;GO:0005739//mitochondrion;GO:0005764//lysosome;GO:0009897//external side of plasma membrane;GO:0009986//cell surface;GO:0016324//apical plasma membrane;GO:0042383//sarcolemma;GO:0042470//melanosome	GO:0004175//endopeptidase activity;GO:0004197//cysteine-type endopeptidase activity;GO:0030984//kininogen binding;GO:0042277//peptide binding;GO:0043621//protein self-association;GO:0044877//macromolecular complex binding	GO:0006508//proteolysis;GO:0006914//autophagy;GO:0007283//spermatogenesis;GO:0007519//skeletal muscle tissue development;GO:0009611//response to wounding;GO:0009612//response to mechanical stimulus;GO:0009749//response to glucose;GO:0014070//response to organic cyclic compound;GO:0014075//response to amine;GO:0034097//response to cytokine;GO:0043434//response to peptide hormone;GO:0045471//respon…
2	BMSK0015594	10.7274	0.647248	114	1942	0.789	0.027	-4.05084	2.05478e-97	3.3045e-93	down	l(2)efl	ACM24338.1 heat shock protein 20.8	Genetic Information Processing;Organismal Systems	Folding, sorting and degradation;Aging	ko04141//Protein processing in endoplasmic reticulum;ko04213//Longevity regulating pathway - multiple species	K09542;K09542	GO:0030018//Z disc;GO:0048471//perinuclear region of cytoplasm	GO:0051082//unfolded protein binding	GO:0007275//multicellular organism development;GO:0009408//response to heat;GO:0010998//regulation of translational initiation by eIF2 alpha phosphorylation;GO:0042026//protein refolding;GO:0045214//sarcomere organization;GO:0061077//chaperone-mediated protein folding
2	BMSK0008729	7.36449	0.132255	114	1942	0.702	0.01	-5.79919	4.92833e-97	7.92574e-93	down	-	hypothetical protein KGM 02075 [Danaus plexippus]	-	-	-	-	-	-	-
2	BMSK0014899	7.00179	0.116023	114	1942	0.675	0.007	-5.91524	6.32448e-97	1.0171e-92	down	Ppn	papilin	-	-	-	-	GO:0005604//basement membrane	GO:0004867//serine-type endopeptidase inhibitor activity;GO:0005201//extracellular matrix structural constituent;GO:0008233//peptidase activity	GO:0007275//multicellular organism development;GO:0030198//extracellular matrix organization
2	BMSK0000106	12.4699	0.32664	114	1942	0.772	0.022	-5.2546	2.33791e-96	3.75982e-92	down	LanA	laminin subunit alpha	Metabolism;Human Diseases;Human Diseases;Environmental Information Processing;Cellular Processes;Human Diseases;Human Diseases;Human Diseases;Environmental Information Processing	Global and overview maps;Cancers;Infectious diseases;Signal transduction;Cellular community - eukaryotes;Infectious diseases;Cancers;Infectious diseases;Signaling molecules and interaction	ko01100//Metabolic pathways;ko05200//Pathways in cancer;ko05165//Human papillomavirus infection;ko04151//PI3K-Akt signaling pathway;ko04510//Focal adhesion;ko05145//Toxoplasmosis;ko05222//Small cell lung cancer;ko05146//Amoebiasis;ko04512//ECM-receptor interaction	K06240;K06240;K06240;K06240;K06240;K06240;K06240;K06240;K06240	GO:0005604//basement membrane;GO:0008021//synaptic vesicle;GO:0030054//cell junction;GO:0030424//axon;GO:0036062//presynaptic periactive zone	GO:0005102//receptor binding	GO:0007411//axon guidance;GO:0007498//mesoderm development;GO:0007507//heart development;GO:0016321//female meiosis chromosome segregation;GO:0030155//regulation of cell adhesion;GO:0030334//regulation of cell migration;GO:0033627//cell adhesion mediated by integrin;GO:0034446//substrate adhesion-dependent cell spreading;GO:0035001//dorsal trunk growth, open tracheal system;GO:0035011//melanotic …
2	BMSK0013103	4.35936	0.0718101	114	1942	0.623	0.003	-5.92378	6.06763e-96	9.75797e-92	down	Acy1	XP 012545260.1 aminoacylase-1	Metabolism;Metabolism;Metabolism;Metabolism	Global and overview maps;Global and overview maps;Amino acid metabolism;Global and overview maps	ko01100//Metabolic pathways;ko01230//Biosynthesis of amino acids;ko00220//Arginine biosynthesis;ko01210//2-Oxocarboxylic acid metabolism	K14677;K14677;K14677;K14677	GO:0005737//cytoplasm;GO:0070062//extracellular exosome	GO:0004046//aminoacylase activity;GO:0008237//metallopeptidase activity;GO:0042802//identical protein binding;GO:0046872//metal ion binding	GO:0006520//cellular amino acid metabolic process
2	BMSK0006315	4.99865	0.031054	114	1942	0.614	0.002	-7.33061	2.38742e-95	3.83946e-91	down	-	balbiani ring protein 3-like [Amyelois transitella]	-	-	-	-	-	-	-
2	BMSK0000577	10.3238	0.182442	114	1942	0.702	0.013	-5.82239	1.40194e-92	2.2546e-88	down	-	uncharacterized protein LOC101735714	-	-	-	-	-	-	-
2	BMSK0000195	7.83548	0.233101	114	1942	0.719	0.017	-5.07099	1.10787e-91	1.78167e-87	down	Fkbp14	FK506-binding protein precursor	-	-	-	-	GO:0005788//endoplasmic reticulum lumen	GO:0003755//peptidyl-prolyl cis-trans isomerase activity;GO:0005509//calcium ion binding	-
2	BMSK0003365	9.8387	1.56962	114	1942	0.886	0.075	-2.64806	6.45921e-91	1.03877e-86	down	P23-2	p23-like protein	Metabolism;Metabolism	Global and overview maps;Lipid metabolism	ko01100//Metabolic pathways;ko00590//Arachidonic acid metabolism	K15730;K15730	GO:0005634//nucleus;GO:0005737//cytoplasm;GO:0005829//cytosol	GO:0051087//chaperone binding;GO:0051879//Hsp90 protein binding	GO:0006457//protein folding;GO:0009408//response to heat;GO:0051085//chaperone mediated protein folding requiring cofactor;GO:0051131//chaperone-mediated protein complex assembly
2	BMSK0006107	4.94858	0.160497	114	1942	0.667	0.011	-4.9464	3.81818e-90	6.1404e-86	down	snk	uncharacterized protein LOC105841272	-	-	-	-	GO:0005576//extracellular region	GO:0004252//serine-type endopeptidase activity	GO:0006508//proteolysis;GO:0008063//Toll signaling pathway;GO:0009950//dorsal/ventral axis specification;GO:0031638//zymogen activation;GO:0045752//positive regulation of Toll signaling pathway
2	BMSK0014898	38.2568	2.09773	114	1942	0.904	0.135	-4.18882	9.07694e-90	1.45975e-85	down	Ppn	Kunitz/Bovine pancreatic trypsin inhibitor domain	-	-	-	-	GO:0005604//basement membrane	GO:0004867//serine-type endopeptidase inhibitor activity;GO:0005201//extracellular matrix structural constituent;GO:0008233//peptidase activity	GO:0007275//multicellular organism development;GO:0030198//extracellular matrix organization
2	BMSK0009485	6.41535	0.436859	114	1942	0.754	0.03	-3.87629	1.19514e-89	1.92203e-85	down	AIFM3	apoptosis-inducing factor 3 isoform X1	-	-	-	-	GO:0005739//mitochondrion;GO:0005743//mitochondrial inner membrane;GO:0005783//endoplasmic reticulum;GO:0005829//cytosol	GO:0016491//oxidoreductase activity;GO:0046872//metal ion binding;GO:0050660//flavin adenine dinucleotide binding;GO:0051537//2 iron, 2 sulfur cluster binding	GO:0097194//execution phase of apoptosis
2	BMSK0009962	8.94672	0.301147	114	1942	0.728	0.021	-4.89282	1.54802e-89	2.48953e-85	down	-	uncharacterized protein LOC106119200 isoform X1 [Papilio xuthus]	-	-	-	-	-	-	-
2	BMSK0005575	9.0967	0.760589	114	1942	0.798	0.044	-3.58015	1.27206e-88	2.04573e-84	down	r	CAD, partial	Metabolism;Metabolism;Metabolism	Global and overview maps;Nucleotide metabolism;Amino acid metabolism	ko01100//Metabolic pathways;ko00240//Pyrimidine metabolism;ko00250//Alanine, aspartate and glutamate metabolism	K11540;K11540;K11540	GO:0005737//cytoplasm;GO:0005829//cytosol	GO:0004070//aspartate carbamoyltransferase activity;GO:0004088//carbamoyl-phosphate synthase (glutamine-hydrolyzing) activity;GO:0004151//dihydroorotase activity;GO:0005524//ATP binding;GO:0046872//metal ion binding;GO:0070406//glutamine binding	GO:0006207//'de novo' pyrimidine nucleobase biosynthetic process;GO:0006228//UTP biosynthetic process;GO:0006541//glutamine metabolic process;GO:0006807//nitrogen compound metabolic process;GO:0019240//citrulline biosynthetic process;GO:0044205//'de novo' UMP biosynthetic process
2	BMSK0006942	5.0857	0.136278	114	1942	0.632	0.008	-5.22182	3.4696e-87	5.5798e-83	down	-	Saposin-like type B, region 1	Cellular Processes	Transport and catabolism	ko04142//Lysosome	K12382	-	-	-
2	BMSK0001329	5.49939	0.105818	114	1942	0.64	0.009	-5.69961	2.45654e-86	3.95061e-82	down	Swip-1	EF-hand domain-containing protein D2 homolog [Amyelois transitella]	-	-	-	-	GO:0005886//plasma membrane;GO:0005927//muscle tendon junction	GO:0005509//calcium ion binding	GO:0007498//mesoderm development
2	BMSK0003485	11.3495	0.248362	114	1942	0.693	0.02	-5.51405	1.57605e-84	2.5346e-80	down	-	lopap [Papilio machaon]	-	-	-	-	-	-	-
2	BMSK0004544	394.426	94.5238	114	1942	1	0.955	-2.06101	3.34778e-84	5.3839e-80	down	-	putative cuticle protein CPH43	-	-	-	-	-	-	-
2	BMSK0001288	21.7588	1.6497	114	1942	0.886	0.101	-3.72132	5.39629e-82	8.67831e-78	down	-	uncharacterized protein LOC101743420	-	-	-	-	-	-	-
2	BMSK0014867	4.79282	0.406008	114	1942	0.693	0.029	-3.56129	5.14294e-79	8.27088e-75	down	-	XP 004921838.1 uncharacterized protein LOC101745117	-	-	-	-	-	-	-
2	BMSK0012509	17.2275	1.53225	114	1942	0.886	0.099	-3.49099	1.4571e-78	2.3433e-74	down	crt	calreticulin	Genetic Information Processing;Human Diseases;Human Diseases;Cellular Processes;Human Diseases;Organismal Systems	Folding, sorting and degradation;Infectious diseases;Infectious diseases;Transport and catabolism;Infectious diseases;Immune system	ko04141//Protein processing in endoplasmic reticulum;ko05166//HTLV-I infection;ko05163//Human cytomegalovirus infection;ko04145//Phagosome;ko05142//Chagas disease (American trypanosomiasis);ko04612//Antigen processing and presentation	K08057;K08057;K08057;K08057;K08057;K08057	GO:0005788//endoplasmic reticulum lumen	GO:0005509//calcium ion binding;GO:0030246//carbohydrate binding;GO:0051082//unfolded protein binding	GO:0006457//protein folding
2	BMSK0005207	4.15715	0.0576971	114	1942	0.561	0.005	-6.17095	1.55231e-78	2.49643e-74	down	-	uncharacterized protein LOC101738419	-	-	-	-	-	-	-
2	BMSK0004115	7.43475	1.00673	114	1942	0.798	0.068	-2.8846	1.43298e-76	2.30451e-72	down	-	uncharacterized protein LOC105386396 [Plutella xylostella]	-	-	-	-	-	-	-
2	BMSK0013355	4.57844	0.255781	114	1942	0.632	0.019	-4.16187	1.45243e-75	2.3358e-71	down	KDM3A	lysine-specific demethylase 3B	Organismal Systems	Environmental adaptation	ko04714//Thermogenesis	K15601	GO:0000785//chromatin;GO:0005634//nucleus;GO:0005737//cytoplasm	GO:0000976//transcription regulatory region sequence-specific DNA binding;GO:0031490//chromatin DNA binding;GO:0032454//histone demethylase activity (H3-K9 specific);GO:0046872//metal ion binding;GO:0051213//dioxygenase activity	GO:0033169//histone H3-K9 demethylation
2	BMSK0010774	4.66187	0.3239	114	1942	0.658	0.025	-3.84729	1.94576e-75	3.12916e-71	down	CD63	tetraspanin E118 isoform X1	Human Diseases;Cellular Processes	Cancers;Transport and catabolism	ko05205//Proteoglycans in cancer;ko04142//Lysosome	K06497;K06497	GO:0005765//lysosomal membrane;GO:0005887//integral component of plasma membrane;GO:0009986//cell surface;GO:0031226//intrinsic component of plasma membrane;GO:0031902//late endosome membrane;GO:0032585//multivesicular body membrane;GO:0042470//melanosome;GO:0070062//extracellular exosome;GO:0097487//multivesicular body, internal vesicle	-	GO:0002092//positive regulation of receptor internalization;GO:0007160//cell-matrix adhesion;GO:0007166//cell surface receptor signaling pathway;GO:0015031//protein transport;GO:0016477//cell migration;GO:0035646//endosome to melanosome transport;GO:0045807//positive regulation of endocytosis;GO:0048757//pigment granule maturation;GO:1900746//regulation of vascular endothelial growth factor signa…
2	BMSK0007495	6.17069	0.39957	114	1942	0.675	0.029	-3.94891	3.71641e-75	5.97673e-71	down	sty	protein sprouty isoform X1	Environmental Information Processing;Human Diseases	Signal transduction;Cancers	ko04013//MAPK signaling pathway - fly;ko05206//MicroRNAs in cancer	K17383;K17383	GO:0005829//cytosol;GO:0005886//plasma membrane;GO:0009898//cytoplasmic side of plasma membrane;GO:0045177//apical part of cell	-	GO:0001745//compound eye morphogenesis;GO:0007424//open tracheal system development;GO:0008069//dorsal/ventral axis specification, ovarian follicular epithelium;GO:0016318//ommatidial rotation;GO:0021782//glial cell development;GO:0035171//lamellocyte differentiation;GO:0040037//negative regulation of fibroblast growth factor receptor signaling pathway;GO:0042059//negative regulation of epidermal…
2	BMSK0000357	4.49528	0.261966	114	1942	0.623	0.02	-4.10096	2.82244e-74	4.53904e-70	down	Plod	procollagen-lysine,2-oxoglutarate 5-dioxygenase 1 isoform X1	Metabolism	Amino acid metabolism	ko00310//Lysine degradation	K13647	GO:0005615//extracellular space;GO:0005783//endoplasmic reticulum;GO:0048471//perinuclear region of cytoplasm	GO:0005506//iron ion binding;GO:0008475//procollagen-lysine 5-dioxygenase activity;GO:0031418//L-ascorbic acid binding	GO:0007295//growth of a germarium-derived egg chamber;GO:0017185//peptidyl-lysine hydroxylation;GO:0030199//collagen fibril organization;GO:0032963//collagen metabolic process;GO:0046947//hydroxylysine biosynthetic process
2	BMSK0008943	5.94939	0.777296	114	1942	0.711	0.048	-2.93621	1.52311e-73	2.44946e-69	down	-	uncharacterized protein LOC101740352	-	-	-	-	-	-	-
2	BMSK0015592	7.5811	0.771123	114	1942	0.711	0.041	-3.29738	1.66154e-73	2.6721e-69	down	l(2)efl	heat shock protein hsp 19.9	Genetic Information Processing;Organismal Systems	Folding, sorting and degradation;Aging	ko04141//Protein processing in endoplasmic reticulum;ko04213//Longevity regulating pathway - multiple species	K09542;K09542	GO:0030018//Z disc;GO:0048471//perinuclear region of cytoplasm	GO:0051082//unfolded protein binding	GO:0007275//multicellular organism development;GO:0009408//response to heat;GO:0010998//regulation of translational initiation by eIF2 alpha phosphorylation;GO:0042026//protein refolding;GO:0045214//sarcomere organization;GO:0061077//chaperone-mediated protein folding
2	BMSK0015909	13.7297	2.21836	114	1942	0.921	0.131	-2.62973	2.71405e-73	4.36473e-69	down	-	hypothetical protein RR48 06795 [Papilio machaon]	-	-	-	-	-	-	-
2	BMSK0011139	7.36454	0.401868	114	1942	0.667	0.027	-4.1958	4.10353e-73	6.5993e-69	down	PPIB	ABF51475.1 peptidylprolyl isomerase B	-	-	-	-	GO:0005788//endoplasmic reticulum lumen;GO:0032991//macromolecular complex;GO:0042470//melanosome	GO:0003755//peptidyl-prolyl cis-trans isomerase activity;GO:0016018//cyclosporin A binding;GO:0051082//unfolded protein binding	GO:0000413//protein peptidyl-prolyl isomerization;GO:0042026//protein refolding;GO:0061077//chaperone-mediated protein folding;GO:1904027//negative regulation of collagen fibril organization
2	BMSK0014479	3.77707	0.0921049	114	1942	0.535	0.006	-5.35785	4.12573e-73	6.635e-69	down	Ser	protein serrate	Human Diseases;Human Diseases;Environmental Information Processing;Human Diseases;Human Diseases;Environmental Information Processing;Environmental Information Processing;Organismal Systems	Cancers;Infectious diseases;Signal transduction;Cancers;Drug resistance;Signal transduction;Signal transduction;Immune system	ko05200//Pathways in cancer;ko05165//Human papillomavirus infection;ko04371//Apelin signaling pathway;ko05224//Breast cancer;ko01522//Endocrine resistance;ko04668//TNF signaling pathway;ko04330//Notch signaling pathway;ko04658//Th1 and Th2 cell differentiation	K06052;K06052;K06052;K06052;K06052;K06052;K06052;K06052	GO:0005886//plasma membrane;GO:0009986//cell surface;GO:0016021//integral component of membrane;GO:0016324//apical plasma membrane;GO:0030673//axolemma;GO:0045179//apical cortex	GO:0005112//Notch binding;GO:0005509//calcium ion binding;GO:0043208//glycosphingolipid binding;GO:0048018//receptor agonist activity	GO:0007219//Notch signaling pathway;GO:0007423//sensory organ development;GO:0007435//salivary gland morphogenesis;GO:0007436//larval salivary gland morphogenesis;GO:0007476//imaginal disc-derived wing morphogenesis;GO:0008587//imaginal disc-derived wing margin morphogenesis;GO:0014009//glial cell proliferation;GO:0016330//second mitotic wave involved in compound eye morphogenesis;GO:0030718//ger…
2	BMSK0009061	10.8672	0.737836	114	1942	0.702	0.039	-3.88054	4.49308e-72	7.22577e-68	down	-	apolipophorin-III precursor	-	-	-	-	GO:0005576//extracellular region	GO:0008289//lipid binding	GO:0006869//lipid transport
2	BMSK0010296	4.63329	0.389229	114	1942	0.623	0.026	-3.57335	2.98183e-71	4.79538e-67	down	hibA	3-hydroxyisobutyrate dehydrogenase isoform X1	Metabolism;Metabolism	Global and overview maps;Amino acid metabolism	ko01100//Metabolic pathways;ko00280//Valine, leucine and isoleucine degradation	K00020;K00020	GO:0005739//mitochondrion	GO:0008442//3-hydroxyisobutyrate dehydrogenase activity;GO:0016616//oxidoreductase activity, acting on the CH-OH group of donors, NAD or NADP as acceptor;GO:0050661//NADP binding;GO:0051287//NAD binding	GO:0006574//valine catabolic process
2	BMSK0006608	8.1168	2.37695	114	1942	0.842	0.124	-1.7718	9.54968e-71	1.53578e-66	down	-	10 kDa heat shock protein, mitochondrial	-	-	-	-	GO:0005759//mitochondrial matrix	GO:0005524//ATP binding	GO:0006457//protein folding
2	BMSK0005975	3.59571	0.265237	114	1942	0.596	0.021	-3.76092	5.55509e-70	8.9337e-66	down	Gel	gelsolin-like [Amyelois transitella]	Human Diseases;Cellular Processes;Organismal Systems	Cancers;Cell motility;Immune system	ko05203//Viral carcinogenesis;ko04810//Regulation of actin cytoskeleton;ko04666//Fc gamma R-mediated phagocytosis	K05768;K05768;K05768	GO:0005576//extracellular region;GO:0005829//cytosol;GO:0005884//actin filament	GO:0003779//actin binding;GO:0046872//metal ion binding;GO:0051015//actin filament binding	GO:0030041//actin filament polymerization
2	BMSK0015965	3.6409	0.0304943	114	1942	0.491	0.003	-6.89961	1.176e-69	1.89124e-65	down	Pick1	XP 004923470.1 PRKCA-binding protein isoform X5	-	-	-	-	GO:0005737//cytoplasm;GO:0005794//Golgi apparatus;GO:0005856//cytoskeleton;GO:0005886//plasma membrane;GO:0008021//synaptic vesicle;GO:0014069//postsynaptic density;GO:0030054//cell junction;GO:0030425//dendrite;GO:0032588//trans-Golgi network membrane;GO:0032991//macromolecular complex;GO:0042734//presynaptic membrane;GO:0043005//neuron projection;GO:0045202//synapse;GO:0045211//postsynaptic mem…	GO:0001664//G-protein coupled receptor binding;GO:0005080//protein kinase C binding;GO:0005102//receptor binding;GO:0005484//SNAP receptor activity;GO:0005543//phospholipid binding;GO:0008022//protein C-terminus binding;GO:0008092//cytoskeletal protein binding;GO:0019904//protein domain specific binding;GO:0030971//receptor tyrosine kinase binding;GO:0035255//ionotropic glutamate receptor binding…	GO:0002092//positive regulation of receptor internalization;GO:0006468//protein phosphorylation;GO:0006886//intracellular protein transport;GO:0007205//protein kinase C-activating G-protein coupled receptor signaling pathway;GO:0010629//negative regulation of gene expression;GO:0015844//monoamine transport;GO:0015872//dopamine transport;GO:0021782//glial cell development;GO:0034316//negative regu…
2	BMSK0007163	6.58342	1.25466	114	1942	0.746	0.068	-2.39155	1.91735e-69	3.08348e-65	down	COX7A1	uncharacterized protein LOC106714088 [Papilio machaon]	Organismal Systems;Human Diseases;Human Diseases;Human Diseases;Metabolism;Human Diseases;Organismal Systems	Environmental adaptation;Neurodegenerative diseases;Neurodegenerative diseases;Neurodegenerative diseases;Energy metabolism;Endocrine and metabolic diseases;Circulatory system	ko04714//Thermogenesis;ko05016//Huntington disease;ko05010//Alzheimer disease;ko05012//Parkinson disease;ko00190//Oxidative phosphorylation;ko04932//Non-alcoholic fatty liver disease (NAFLD);ko04260//Cardiac muscle contraction	K02270;K02270;K02270;K02270;K02270;K02270;K02270	GO:0005739//mitochondrion;GO:0005746//mitochondrial respiratory chain;GO:0016021//integral component of membrane	GO:0004129//cytochrome-c oxidase activity	GO:0002082//regulation of oxidative phosphorylation;GO:0006091//generation of precursor metabolites and energy;GO:0097250//mitochondrial respiratory chain supercomplex assembly
2	BMSK0014426	4.73357	1.54808	114	1942	0.711	0.078	-1.61245	6.52017e-69	1.04857e-64	down	Atp5me	H+ transporting ATP synthase subunit e	Metabolism;Organismal Systems;Metabolism	Global and overview maps;Environmental adaptation;Energy metabolism	ko01100//Metabolic pathways;ko04714//Thermogenesis;ko00190//Oxidative phosphorylation	K02129;K02129;K02129	-	-	-
2	BMSK0011953	2.90016	0.100974	114	1942	0.491	0.005	-4.84407	7.7248e-69	1.2423e-64	down	Fbln7	XP 012545245.1 fibrillin-1, partial	-	-	-	-	GO:0005576//extracellular region	GO:0005509//calcium ion binding;GO:0008201//heparin binding	GO:0007155//cell adhesion
2	BMSK0003438	10.9333	1.65544	114	1942	0.833	0.098	-2.72343	8.55215e-69	1.37536e-64	down	-	-	-	-	-	-	-	-	-
2	BMSK0008116	2.74938	0.066521	114	1942	0.5	0.005	-5.36915	1.09405e-68	1.75946e-64	down	GALM	aldose 1-epimerase	Metabolism;Metabolism;Metabolism	Global and overview maps;Carbohydrate metabolism;Carbohydrate metabolism	ko01100//Metabolic pathways;ko00010//Glycolysis / Gluconeogenesis;ko00052//Galactose metabolism	K01785;K01785;K01785	GO:0005737//cytoplasm	GO:0004034//aldose 1-epimerase activity;GO:0030246//carbohydrate binding	GO:0006006//glucose metabolic process;GO:0033499//galactose catabolic process via UDP-galactose
2	BMSK0002376	3.0975	0.272355	114	1942	0.579	0.021	-3.50754	1.66298e-68	2.6744e-64	down	Cyt-b5	cytochrome b5	-	-	-	-	GO:0005789//endoplasmic reticulum membrane;GO:0016021//integral component of membrane	GO:0020037//heme binding;GO:0046872//metal ion binding	GO:0055114//oxidation-reduction process
2	BMSK0004194	2.98175	0.0589235	114	1942	0.482	0.004	-5.66117	1.72154e-67	2.76857e-63	down	-	uncharacterized protein LOC101735738 isoform X2	-	-	-	-	-	-	-
2	BMSK0011431	9.02877	2.18292	114	1942	0.868	0.131	-2.04827	4.60759e-67	7.40992e-63	down	COX4I1	ABF51243.1 cytochrome c oxidase subunit IV	Metabolism;Organismal Systems;Human Diseases;Human Diseases;Human Diseases;Metabolism;Human Diseases;Organismal Systems	Global and overview maps;Environmental adaptation;Neurodegenerative diseases;Neurodegenerative diseases;Neurodegenerative diseases;Energy metabolism;Endocrine and metabolic diseases;Circulatory system	ko01100//Metabolic pathways;ko04714//Thermogenesis;ko05016//Huntington disease;ko05010//Alzheimer disease;ko05012//Parkinson disease;ko00190//Oxidative phosphorylation;ko04932//Non-alcoholic fatty liver disease (NAFLD);ko04260//Cardiac muscle contraction	K02263;K02263;K02263;K02263;K02263;K02263;K02263;K02263	GO:0005751//mitochondrial respiratory chain complex IV	GO:0004129//cytochrome-c oxidase activity	GO:0006123//mitochondrial electron transport, cytochrome c to oxygen
2	BMSK0001211	2.68046	0.134148	114	1942	0.526	0.011	-4.32058	6.69219e-67	1.07624e-62	down	EIF4EBP2	eukaryotic translation initiation factor 4E-binding protein 2	Genetic Information Processing;Organismal Systems	Translation;Aging	ko03013//RNA transport;ko04213//Longevity regulating pathway - multiple species	K18644;K18644	GO:0005737//cytoplasm;GO:0098794//postsynapse	GO:0008190//eukaryotic initiation factor 4E binding;GO:0030371//translation repressor activity	GO:0006412//translation;GO:0007613//memory;GO:0008286//insulin receptor signaling pathway;GO:0019933//cAMP-mediated signaling;GO:0031929//TOR signaling;GO:0035176//social behavior;GO:0045947//negative regulation of translational initiation;GO:0048167//regulation of synaptic plasticity;GO:0050804//modulation of synaptic transmission
2	BMSK0004739	7.45169	0.748544	114	1942	0.667	0.039	-3.31541	8.7566e-67	1.40824e-62	down	-	peptidoglycan recognition protein precursor	Organismal Systems	Immune system	ko04624//Toll and Imd signaling pathway	K01446	-	GO:0008270//zinc ion binding;GO:0008745//N-acetylmuramoyl-L-alanine amidase activity;GO:0042834//peptidoglycan binding	GO:0009253//peptidoglycan catabolic process;GO:0045087//innate immune response
2	BMSK0004675	3.57183	0.48108	114	1942	0.596	0.029	-2.89231	1.41919e-66	2.28234e-62	down	ND-ACP	DH dehydrogenase isoform 2	Metabolism;Organismal Systems;Human Diseases;Human Diseases;Human Diseases;Metabolism;Human Diseases;Organismal Systems	Global and overview maps;Environmental adaptation;Neurodegenerative diseases;Neurodegenerative diseases;Neurodegenerative diseases;Energy metabolism;Endocrine and metabolic diseases;Nervous system	ko01100//Metabolic pathways;ko04714//Thermogenesis;ko05016//Huntington disease;ko05010//Alzheimer disease;ko05012//Parkinson disease;ko00190//Oxidative phosphorylation;ko04932//Non-alcoholic fatty liver disease (NAFLD);ko04723//Retrograde endocannabinoid signaling	K03955;K03955;K03955;K03955;K03955;K03955;K03955;K03955	GO:0005739//mitochondrion;GO:0005747//mitochondrial respiratory chain complex I	GO:0000035//acyl binding;GO:0000036//ACP phosphopantetheine attachment site binding involved in fatty acid biosynthetic process;GO:0031177//phosphopantetheine binding	GO:0006120//mitochondrial electron transport, NADH to ubiquinone;GO:0006633//fatty acid biosynthetic process
2	BMSK0002248	5.71037	0.807706	114	1942	0.702	0.054	-2.82168	2.12113e-66	3.4112e-62	down	-	Sulfotransferase family	-	-	-	-	-	-	-
2	BMSK0007985	3.58675	0.287068	114	1942	0.579	0.022	-3.64321	3.74213e-66	6.01809e-62	down	-	uncharacterized protein LOC105842936	-	-	-	-	-	-	-
2	BMSK0002974	3.30452	0.305457	114	1942	0.57	0.023	-3.4354	9.68103e-66	1.5569e-61	down	ATL2	atlastin-like	-	-	-	-	GO:0005783//endoplasmic reticulum;GO:0005789//endoplasmic reticulum membrane;GO:0016020//membrane;GO:0016021//integral component of membrane;GO:0098826//endoplasmic reticulum tubular network membrane	GO:0003924//GTPase activity;GO:0005525//GTP binding;GO:0042802//identical protein binding	GO:0007029//endoplasmic reticulum organization;GO:0007030//Golgi organization;GO:0051260//protein homooligomerization;GO:1990809//endoplasmic reticulum tubular network membrane organization
2	BMSK0010986	2.49295	0.0350011	114	1942	0.456	0.003	-6.15431	1.35254e-65	2.17515e-61	down	OLFML2A	XP 012552033.1 uncharacterized protein LOC101741742	-	-	-	-	GO:0005576//extracellular region	-	-
2	BMSK0005673	3.27385	0.460987	114	1942	0.579	0.029	-2.82819	1.04288e-64	1.67716e-60	down	RAB26	ras-related protein Rab-37 isoform X1	-	-	-	-	GO:0000139//Golgi membrane;GO:0030667//secretory granule membrane;GO:0031226//intrinsic component of plasma membrane	GO:0003924//GTPase activity;GO:0005525//GTP binding;GO:0019002//GMP binding	GO:0006886//intracellular protein transport;GO:0017157//regulation of exocytosis;GO:0032482//Rab protein signal transduction;GO:0035272//exocrine system development;GO:0043001//Golgi to plasma membrane protein transport;GO:0045055//regulated exocytosis;GO:0099575//regulation of protein catabolic process at presynapse, modulating synaptic transmission
2	BMSK0004546	3.59193	0.67809	114	1942	0.553	0.026	-2.40521	1.17396e-64	1.88796e-60	down	-	Interferon-induced 6-16 family	-	-	-	-	-	-	-
2	BMSK0014968	3.54904	0.388989	114	1942	0.605	0.032	-3.18963	2.03533e-64	3.27322e-60	down	bai	transmembrane trafficking protein precursor	-	-	-	-	GO:0016021//integral component of membrane	-	GO:0009953//dorsal/ventral pattern formation
2	BMSK0011786	3.00422	0.194977	114	1942	0.526	0.014	-3.94562	2.29461e-64	3.6902e-60	down	Pgi	glucose-6-phosphate isomerase	Metabolism;Metabolism;Metabolism;Metabolism;Metabolism;Metabolism	Global and overview maps;Global and overview maps;Carbohydrate metabolism;Carbohydrate metabolism;Carbohydrate metabolism;Carbohydrate metabolism	ko01100//Metabolic pathways;ko01200//Carbon metabolism;ko00010//Glycolysis / Gluconeogenesis;ko00520//Amino sugar and nucleotide sugar metabolism;ko00030//Pentose phosphate pathway;ko00500//Starch and sucrose metabolism	K01810;K01810;K01810;K01810;K01810;K01810	GO:0005829//cytosol	GO:0004347//glucose-6-phosphate isomerase activity	GO:0006094//gluconeogenesis;GO:0006096//glycolytic process;GO:0042593//glucose homeostasis
2	BMSK0002061	2.70936	0.166438	114	1942	0.509	0.012	-4.0249	3.06954e-64	4.93644e-60	down	Mfsd1	major facilitator superfamily domain-containing protein 1-like isoform X1 [Amyelois transitella]	-	-	-	-	GO:0016021//integral component of membrane	-	GO:0055085//transmembrane transport
2	BMSK0004248	7.14359	0.865903	114	1942	0.719	0.064	-3.04437	4.61567e-64	7.42292e-60	down	C1GalTA	glycoprotein-N-acetylgalactosamine 3-beta-galactosyltransferase 1 isoform X2 [Papilio polytes]	Metabolism;Metabolism	Global and overview maps;Glycan biosynthesis and metabolism	ko01100//Metabolic pathways;ko00512//Mucin type O-glycan biosynthesis	K00731;K00731	GO:0016021//integral component of membrane	GO:0016263//glycoprotein-N-acetylgalactosamine 3-beta-galactosyltransferase activity;GO:0046872//metal ion binding;GO:0048531//beta-1,3-galactosyltransferase activity	GO:0006486//protein glycosylation;GO:0007528//neuromuscular junction development;GO:0009247//glycolipid biosynthetic process;GO:0016267//O-glycan processing, core 1;GO:0021551//central nervous system morphogenesis;GO:0051489//regulation of filopodium assembly;GO:0055001//muscle cell development;GO:1902037//negative regulation of hematopoietic stem cell differentiation
2	BMSK0003378	3.37854	0.988479	114	1942	0.623	0.06	-1.77312	6.54152e-64	1.05201e-59	down	Gdh	glutamate dehydrogenase	Metabolism;Metabolism;Cellular Processes;Metabolism;Metabolism;Metabolism;Organismal Systems;Metabolism	Global and overview maps;Global and overview maps;Cell growth and death;Amino acid metabolism;Amino acid metabolism;Energy metabolism;Excretory system;Metabolism of other amino acids	ko01100//Metabolic pathways;ko01200//Carbon metabolism;ko04217//Necroptosis;ko00250//Alanine, aspartate and glutamate metabolism;ko00220//Arginine biosynthesis;ko00910//Nitrogen metabolism;ko04964//Proximal tubule bicarbonate reclamation;ko00471//D-Glutamine and D-glutamate metabolism	K00261;K00261;K00261;K00261;K00261;K00261;K00261;K00261	GO:0005737//cytoplasm;GO:0005739//mitochondrion;GO:0005759//mitochondrial matrix;GO:0005829//cytosol	GO:0004352//glutamate dehydrogenase (NAD+) activity;GO:0004353//glutamate dehydrogenase [NAD(P)+] activity;GO:0005524//ATP binding;GO:0005525//GTP binding;GO:0042802//identical protein binding	GO:0006116//NADH oxidation;GO:0006536//glutamate metabolic process;GO:0019551//glutamate catabolic process to 2-oxoglutarate
2	BMSK0015660	5.03807	2.0479	114	1942	0.746	0.111	-1.29872	1.63683e-63	2.63236e-59	down	SNRPG	probable small nuclear ribonucleoprotein G [Plutella xylostella]	Genetic Information Processing	Transcription	ko03040//Spliceosome	K11099	GO:0005634//nucleus;GO:0005681//spliceosomal complex;GO:0005682//U5 snRNP;GO:0005685//U1 snRNP;GO:0005686//U2 snRNP;GO:0005687//U4 snRNP;GO:0005689//U12-type spliceosomal complex;GO:0005829//cytosol;GO:0030532//small nuclear ribonucleoprotein complex;GO:0034719//SMN-Sm protein complex;GO:0043186//P granule;GO:0071004//U2-type prespliceosome;GO:0071011//precatalytic spliceosome;GO:0071013//catalyt…	GO:0003723//RNA binding	GO:0000387//spliceosomal snRNP assembly;GO:0000398//mRNA splicing, via spliceosome
2	BMSK0014055	17.9607	3.50707	114	1942	0.939	0.188	-2.35651	2.14266e-63	3.44582e-59	down	-	ABF51339.1 ferritin isoform 1	-	-	-	-	-	-	-
2	BMSK0013432	2.90066	0.159818	114	1942	0.491	0.01	-4.18188	2.92872e-63	4.70997e-59	down	ACADSB	acyl-coenzyme A dehydrogenase	Metabolism;Metabolism;Metabolism;Metabolism	Global and overview maps;Global and overview maps;Amino acid metabolism;Lipid metabolism	ko01100//Metabolic pathways;ko01212//Fatty acid metabolism;ko00280//Valine, leucine and isoleucine degradation;ko00071//Fatty acid degradation	K09478;K09478;K09478;K09478	GO:0005739//mitochondrion;GO:0005759//mitochondrial matrix	GO:0003995//acyl-CoA dehydrogenase activity;GO:0050660//flavin adenine dinucleotide binding	GO:0006631//fatty acid metabolic process;GO:0009083//branched-chain amino acid catabolic process
2	BMSK0013222	4.08166	1.2438	114	1942	0.667	0.075	-1.7144	3.03836e-63	4.88629e-59	down	ATPsynO	ABF51369.1 H+ transporting ATP synthase O subunit isoform 2	Metabolism;Organismal Systems;Human Diseases;Human Diseases;Human Diseases;Metabolism	Global and overview maps;Environmental adaptation;Neurodegenerative diseases;Neurodegenerative diseases;Neurodegenerative diseases;Energy metabolism	ko01100//Metabolic pathways;ko04714//Thermogenesis;ko05016//Huntington disease;ko05010//Alzheimer disease;ko05012//Parkinson disease;ko00190//Oxidative phosphorylation	K02137;K02137;K02137;K02137;K02137;K02137	GO:0005739//mitochondrion;GO:0005756//mitochondrial proton-transporting ATP synthase, central stalk	GO:0046933//proton-transporting ATP synthase activity, rotational mechanism	GO:0042776//mitochondrial ATP synthesis coupled proton transport;GO:1902600//hydrogen ion transmembrane transport
2	BMSK0014087	6.14117	1.7575	114	1942	0.728	0.094	-1.80499	3.65421e-63	5.8767e-59	down	Prosalpha2	proteasome 25 kDa subunit	Genetic Information Processing	Folding, sorting and degradation	ko03050//Proteasome	K02726	GO:0000502//proteasome complex;GO:0005634//nucleus;GO:0005654//nucleoplasm;GO:0005737//cytoplasm;GO:0005829//cytosol;GO:0005839//proteasome core complex;GO:0019773//proteasome core complex, alpha-subunit complex	GO:0004175//endopeptidase activity;GO:0004298//threonine-type endopeptidase activity	GO:0007623//circadian rhythm;GO:0008063//Toll signaling pathway;GO:0010498//proteasomal protein catabolic process;GO:0010499//proteasomal ubiquitin-independent protein catabolic process;GO:0043161//proteasome-mediated ubiquitin-dependent protein catabolic process
2	BMSK0005752	4.62641	0.905764	114	1942	0.667	0.061	-2.35269	1.02413e-62	1.647e-58	down	-	X box binding protein-1 [Operophtera brumata]	-	-	-	-	-	-	-
2	BMSK0014056	17.1717	3.37435	114	1942	0.939	0.198	-2.34735	3.23552e-62	5.20336e-58	down	FERH	ABF51285.1 ferritin	Cellular Processes;Organismal Systems;Cellular Processes	Cell growth and death;Digestive system;Cell growth and death	ko04217//Necroptosis;ko04978//Mineral absorption;ko04216//Ferroptosis	K00522;K00522;K00522	GO:0005576//extracellular region;GO:0005623//cell	GO:0004322//ferroxidase activity;GO:0008199//ferric iron binding	GO:0006826//iron ion transport;GO:0006879//cellular iron ion homeostasis
2	BMSK0010637	2.85108	0.282514	114	1942	0.5	0.015	-3.33512	3.65482e-62	5.87768e-58	down	Tis11	XP 004928273.1 protein TIS11 isoform X1	Human Diseases;Human Diseases	Infectious diseases;Infectious diseases	ko05166//HTLV-I infection;ko05167//Kaposi sarcoma-associated herpesvirus infection	K15308;K15308	GO:0005634//nucleus;GO:0005829//cytosol	GO:0003677//DNA binding;GO:0003730//mRNA 3'-UTR binding;GO:0035925//mRNA 3'-UTR AU-rich region binding;GO:0046872//metal ion binding	GO:0010629//negative regulation of gene expression;GO:0016246//RNA interference;GO:0061158//3'-UTR-mediated mRNA destabilization;GO:1900153//positive regulation of nuclear-transcribed mRNA catabolic process, deadenylation-dependent decay
2	BMSK0009255	4.31131	0.733878	114	1942	0.596	0.04	-2.55452	5.77685e-62	9.29033e-58	down	Ald	fructose 1,6-bisphosphate aldolase	Metabolism;Metabolism;Metabolism;Environmental Information Processing;Metabolism;Metabolism;Metabolism	Global and overview maps;Global and overview maps;Global and overview maps;Signal transduction;Carbohydrate metabolism;Carbohydrate metabolism;Carbohydrate metabolism	ko01100//Metabolic pathways;ko01200//Carbon metabolism;ko01230//Biosynthesis of amino acids;ko04066//HIF-1 signaling pathway;ko00010//Glycolysis / Gluconeogenesis;ko00051//Fructose and mannose metabolism;ko00030//Pentose phosphate pathway	K01623;K01623;K01623;K01623;K01623;K01623;K01623	GO:0005829//cytosol;GO:0030018//Z disc;GO:0031430//M band	GO:0004332//fructose-bisphosphate aldolase activity	GO:0006096//glycolytic process;GO:0007498//mesoderm development;GO:0042593//glucose homeostasis
2	BMSK0004527	3.1523	0.159535	114	1942	0.5	0.011	-4.30446	1.38296e-61	2.22407e-57	down	Mmp2	matrix metalloproteinase-14-like [Plutella xylostella]	-	-	-	-	GO:0005615//extracellular space;GO:0005886//plasma membrane;GO:0009897//external side of plasma membrane;GO:0016021//integral component of membrane;GO:0030425//dendrite;GO:0031012//extracellular matrix	GO:0004175//endopeptidase activity;GO:0004222//metalloendopeptidase activity;GO:0008270//zinc ion binding	GO:0002218//activation of innate immune response;GO:0003144//embryonic heart tube formation;GO:0003319//cardioblast migration to the midline involved in heart rudiment formation;GO:0006929//substrate-dependent cell migration;GO:0007419//ventral cord development;GO:0007424//open tracheal system development;GO:0007426//tracheal outgrowth, open tracheal system;GO:0007505//adult fat body development;…
2	BMSK0006124	4.74208	1.20813	114	1942	0.675	0.077	-1.97275	1.74597e-61	2.80786e-57	down	-	uncharacterized protein LOC106133714 [Amyelois transitella]	-	-	-	-	-	-	-
2	BMSK0013014	3.50844	1.06281	114	1942	0.614	0.059	-1.72295	2.02637e-61	3.25881e-57	down	-	XP 004927506.1 uncharacterized protein LOC101744756	-	-	-	-	-	-	-
2	BMSK0014681	6.66609	1.10594	114	1942	0.711	0.073	-2.59157	3.33113e-61	5.35712e-57	down	TMEM245	XP 004924600.1 uncharacterized protein LOC101746938	-	-	-	-	GO:0016021//integral component of membrane	-	-
2	BMSK0002199	2.7816	0.203439	114	1942	0.5	0.014	-3.77325	4.61945e-61	7.429e-57	down	-	retinaldehyde-binding protein 1 isoform X1	-	-	-	-	-	-	-
2	BMSK0007651	2.53262	0.400513	114	1942	0.535	0.027	-2.66071	4.9502e-61	7.96091e-57	down	Rab3-GEF	probable glutamine--tR ligase	-	-	-	-	GO:0008021//synaptic vesicle;GO:0016021//integral component of membrane;GO:0043025//neuronal cell body;GO:0043195//terminal bouton;GO:0098527//neuromuscular junction of somatic muscle	GO:0017112//Rab guanyl-nucleotide exchange factor activity	GO:0000187//activation of MAPK activity;GO:0006915//apoptotic process;GO:0007269//neurotransmitter secretion;GO:0016192//vesicle-mediated transport;GO:0032483//regulation of Rab protein signal transduction;GO:0048789//cytoskeletal matrix organization at active zone;GO:0051726//regulation of cell cycle;GO:1902041//regulation of extrinsic apoptotic signaling pathway via death domain receptors
2	BMSK0013363	2.85524	0.156661	114	1942	0.5	0.012	-4.1879	5.85659e-61	9.41857e-57	down	slc16a12b	XP 004932688.1 monocarboxylate transporter 7	-	-	-	-	GO:0005887//integral component of plasma membrane	GO:0005308//creatine transmembrane transporter activity;GO:0008028//monocarboxylic acid transmembrane transporter activity;GO:0015293//symporter activity	GO:0015718//monocarboxylic acid transport;GO:0015881//creatine transport
2	BMSK0003164	3.24482	0.441432	114	1942	0.553	0.028	-2.87788	6.01563e-61	9.67434e-57	down	-	UDP-galactose 4-epimerase	-	-	-	-	-	-	-
2	BMSK0014264	9.41579	1.99668	114	1942	0.833	0.129	-2.23748	8.98845e-61	1.44552e-56	down	Hnrnpul1	heterogeneous nuclear ribonucleoprotein U-like protein 2 isoform X2 [Papilio xuthus]	Human Diseases	Infectious diseases	ko05164//Influenza A	K15047	GO:0005634//nucleus;GO:0005654//nucleoplasm	GO:0003723//RNA binding;GO:0019899//enzyme binding	GO:0006396//RNA processing;GO:0009615//response to virus
2	BMSK0015612	3.46192	0.210692	114	1942	0.526	0.017	-4.03836	1.12309e-60	1.80616e-56	down	Slc9a3r2	XP 004923504.1 Na(+)/H(+) exchange regulatory cofactor NHE-RF1	Organismal Systems	Excretory system	ko04960//Aldosterone-regulated sodium reabsorption	K13358	GO:0005634//nucleus;GO:0012505//endomembrane system;GO:0016324//apical plasma membrane;GO:0032991//macromolecular complex	GO:0032947//protein complex scaffold;GO:0047485//protein N-terminus binding;GO:0050750//low-density lipoprotein particle receptor binding	GO:0034767//positive regulation of ion transmembrane transport;GO:0048839//inner ear development
2	BMSK0001970	6.44119	0.524425	114	1942	0.649	0.045	-3.61852	1.46326e-60	2.35322e-56	down	Bgb	protein brother-like [Papilio xuthus]	-	-	-	-	GO:0005634//nucleus;GO:0016513//core-binding factor complex	GO:0003677//DNA binding;GO:0003712//transcription cofactor activity;GO:0003713//transcription coactivator activity;GO:0008134//transcription factor binding;GO:0046982//protein heterodimerization activity	GO:0006357//regulation of transcription from RNA polymerase II promoter;GO:0035206//regulation of hemocyte proliferation
2	BMSK0003121	4.46333	1.07796	114	1942	0.658	0.064	-2.04982	1.71777e-60	2.76252e-56	down	Ndufa4	putative DH=ubiquinone dehydrogenase [Danaus plexippus]	Metabolism;Organismal Systems;Human Diseases;Human Diseases;Human Diseases;Metabolism;Human Diseases;Organismal Systems	Global and overview maps;Environmental adaptation;Neurodegenerative diseases;Neurodegenerative diseases;Neurodegenerative diseases;Energy metabolism;Endocrine and metabolic diseases;Nervous system	ko01100//Metabolic pathways;ko04714//Thermogenesis;ko05016//Huntington disease;ko05010//Alzheimer disease;ko05012//Parkinson disease;ko00190//Oxidative phosphorylation;ko04932//Non-alcoholic fatty liver disease (NAFLD);ko04723//Retrograde endocannabinoid signaling	K03948;K03948;K03948;K03948;K03948;K03948;K03948;K03948	GO:0005739//mitochondrion;GO:0005743//mitochondrial inner membrane;GO:0005751//mitochondrial respiratory chain complex IV	GO:0004129//cytochrome-c oxidase activity;GO:0044877//macromolecular complex binding	-
2	BMSK0008270	4.15286	0.60827	114	1942	0.596	0.039	-2.77132	1.79918e-60	2.89344e-56	down	-	uncharacterized protein LOC105389192 [Plutella xylostella]	-	-	-	-	-	-	-
2	BMSK0009964	2.21603	0.0552559	114	1942	0.439	0.004	-5.3257	1.94676e-60	3.13078e-56	down	Tret1	facilitated trehalose transporter Tret1-like isoform X3	-	-	-	-	GO:0005886//plasma membrane;GO:0016021//integral component of membrane	GO:0015574//trehalose transmembrane transporter activity	GO:0015771//trehalose transport
2	BMSK0001499	3.82852	0.965657	114	1942	0.649	0.064	-1.9872	8.17732e-60	1.31508e-55	down	exc-4	chloride intracellular channel isoform X1	-	-	-	-	GO:0005634//nucleus;GO:0005764//lysosome;GO:0005887//integral component of plasma membrane;GO:0016324//apical plasma membrane;GO:0034707//chloride channel complex;GO:0043296//apical junction complex	GO:0005244//voltage-gated ion channel activity;GO:0005254//chloride channel activity	GO:0002064//epithelial cell development;GO:0034765//regulation of ion transmembrane transport;GO:0035150//regulation of tube size
2	BMSK0014730	3.31194	0.290065	114	1942	0.535	0.022	-3.51323	9.08726e-60	1.46141e-55	down	RRBP1	ribosome-binding protein 1 isoform X1	Genetic Information Processing	Folding, sorting and degradation	ko04141//Protein processing in endoplasmic reticulum	K14000	GO:0030176//integral component of endoplasmic reticulum membrane	-	GO:0007165//signal transduction;GO:0015031//protein transport
2	BMSK0001450	10.8349	4.02491	114	1942	0.904	0.201	-1.42866	1.70952e-59	2.74924e-55	down	porin	voltage-dependent anion-selective channel isoform X1	Human Diseases;Human Diseases;Human Diseases;Environmental Information Processing;Environmental Information Processing;Cellular Processes;Cellular Processes;Organismal Systems;Organismal Systems;Cellular Processes	Neurodegenerative diseases;Neurodegenerative diseases;Infectious diseases;Signal transduction;Signal transduction;Cell growth and death;Cell growth and death;Immune system;Digestive system;Cell growth and death	ko05016//Huntington disease;ko05012//Parkinson disease;ko05166//HTLV-I infection;ko04020//Calcium signaling pathway;ko04022//cGMP - PKG signaling pathway;ko04218//Cellular senescence;ko04217//Necroptosis;ko04621//NOD-like receptor signaling pathway;ko04979//Cholesterol metabolism;ko04216//Ferroptosis	K15040;K15040;K15040;K15040;K15040;K15040;K15040;K15040;K15040;K15040	GO:0005739//mitochondrion;GO:0005741//mitochondrial outer membrane;GO:0016006//Nebenkern;GO:0046930//pore complex	GO:0008308//voltage-gated anion channel activity;GO:0015288//porin activity	GO:0006811//ion transport;GO:0006839//mitochondrial transport;GO:0007005//mitochondrion organization;GO:0007291//sperm individualization;GO:0007602//phototransduction;GO:0030382//sperm mitochondrion organization
2	BMSK0011099	2.06763	0.10708	114	1942	0.412	0.004	-4.27122	3.82028e-59	6.14377e-55	down	FDPS	farnesyl diphosphate synthase	Metabolism;Human Diseases;Human Diseases;Metabolism	Global and overview maps;Infectious diseases;Infectious diseases;Metabolism of terpenoids and polyketides	ko01100//Metabolic pathways;ko05166//HTLV-I infection;ko05164//Influenza A;ko00900//Terpenoid backbone biosynthesis	K00787;K00787;K00787;K00787	GO:0005737//cytoplasm	GO:0004161//dimethylallyltranstransferase activity;GO:0004337//geranyltranstransferase activity;GO:0046872//metal ion binding	GO:0006695//cholesterol biosynthetic process;GO:0033384//geranyl diphosphate biosynthetic process;GO:0045337//farnesyl diphosphate biosynthetic process
2	BMSK0013039	33.3496	7.5077	114	1942	0.982	0.35	-2.15123	1.43612e-58	2.30956e-54	down	PCM3	EF hand	Human Diseases;Human Diseases;Environmental Information Processing;Environmental Information Processing;Organismal Systems;Environmental Information Processing;Human Diseases;Environmental Information Processing;Organismal Systems;Environmental Information Processing;Human Diseases;Cellular Processes;Organismal Systems;Cellular Processes;Organismal Systems;Environmental Information Processing;Org…	Cancers;Neurodegenerative diseases;Signal transduction;Signal transduction;Endocrine system;Signal transduction;Substance dependence;Signal transduction;Circulatory system;Signal transduction;Infectious diseases;Cell growth and death;Endocrine system;Cell growth and death;Circulatory system;Signal transduction;Nervous system;Endocrine system;Endocrine system;Endocrine system;Cardiovascular diseas…	ko05200//Pathways in cancer;ko05010//Alzheimer disease;ko04024//cAMP signaling pathway;ko04014//Ras signaling pathway;ko04910//Insulin signaling pathway;ko04015//Rap1 signaling pathway;ko05034//Alcoholism;ko04020//Calcium signaling pathway;ko04270//Vascular smooth muscle contraction;ko04022//cGMP - PKG signaling pathway;ko05163//Human cytomegalovirus infection;ko04114//Oocyte meiosis;ko04921//Oxy…	K02183;K02183;K02183;K02183;K02183;K02183;K02183;K02183;K02183;K02183;K02183;K02183;K02183;K02183;K02183;K02183;K02183;K02183;K02183;K02183;K02183;K02183;K02183;K02183;K02183;K02183;K02183;K02183;K02183;K02183;K02183;K02183;K02183;K02183;K02183;K02183;K02183;K02183;K02183;K02183	-	GO:0005509//calcium ion binding	-
2	BMSK0009108	2.32657	0.080056	114	1942	0.447	0.007	-4.86105	8.80627e-58	1.41622e-53	down	-	venom serine carboxypeptidase	-	-	-	-	GO:0005576//extracellular region	GO:0004185//serine-type carboxypeptidase activity	-
2	BMSK0004961	3.22086	0.346011	114	1942	0.553	0.029	-3.21856	1.69922e-57	2.73268e-53	down	uba3	signal peptidase 18 kDa subunit	Genetic Information Processing	Folding, sorting and degradation	ko04120//Ubiquitin mediated proteolysis	K10686	GO:0005634//nucleus;GO:0005737//cytoplasm	GO:0005524//ATP binding;GO:0019781//NEDD8 activating enzyme activity	GO:0032446//protein modification by small protein conjugation;GO:0045116//protein neddylation
2	BMSK0007265	12.4386	3.77244	114	1942	0.895	0.185	-1.72126	3.0031e-57	4.82958e-53	down	Rsf1	repressor splicing factor 1 isoform X1	-	-	-	-	GO:0005634//nucleus;GO:0016607//nuclear speck	GO:0003723//RNA binding;GO:0003729//mRNA binding	GO:0000381//regulation of alternative mRNA splicing, via spliceosome;GO:0001178//regulation of transcriptional start site selection at RNA polymerase II promoter;GO:0010468//regulation of gene expression;GO:0031440//regulation of mRNA 3'-end processing;GO:0045292//mRNA cis splicing, via spliceosome
2	BMSK0004181	5.05419	1.11584	114	1942	0.684	0.083	-2.17936	3.42645e-57	5.51041e-53	down	PXN	transforming growth factor beta-1-induced transcript 1 protein isoform X1	-	-	-	-	GO:0001725//stress fiber;GO:0005829//cytosol;GO:0005875//microtubule associated complex;GO:0005886//plasma membrane;GO:0005925//focal adhesion;GO:0005938//cell cortex;GO:0030027//lamellipodium	GO:0005178//integrin binding;GO:0008013//beta-catenin binding;GO:0017166//vinculin binding;GO:0019901//protein kinase binding;GO:0019903//protein phosphatase binding;GO:0031625//ubiquitin protein ligase binding;GO:0038191//neuropilin binding;GO:0046872//metal ion binding	GO:0006936//muscle contraction;GO:0007155//cell adhesion;GO:0007160//cell-matrix adhesion;GO:0007165//signal transduction;GO:0007172//signal complex assembly;GO:0007179//transforming growth factor beta receptor signaling pathway;GO:0034614//cellular response to reactive oxygen species;GO:0043542//endothelial cell migration;GO:0048010//vascular endothelial growth factor receptor signaling pathway;…
2	BMSK0002499	6.7919	1.65993	114	1942	0.737	0.097	-2.0327	5.37778e-57	8.64854e-53	down	mai-2	ATPase inhibitor-like protein	-	-	-	-	GO:0005739//mitochondrion	GO:0042030//ATPase inhibitor activity;GO:0051117//ATPase binding	GO:0006783//heme biosynthetic process;GO:0032780//negative regulation of ATPase activity
2	BMSK0010125	4.3469	0.907454	114	1942	0.64	0.06	-2.26009	6.66234e-57	1.07144e-52	down	Spase12	signal peptidase complex subunit 1 [Amyelois transitella]	Genetic Information Processing	Folding, sorting and degradation	ko03060//Protein export	K12946	GO:0005787//signal peptidase complex;GO:0030176//integral component of endoplasmic reticulum membrane	GO:0008233//peptidase activity	GO:0006465//signal peptide processing;GO:0045047//protein targeting to ER
2	BMSK0008123	2.40693	0.0353211	114	1942	0.412	0.003	-6.09052	8.92953e-57	1.43605e-52	down	-	-	-	-	-	-	-	-	-
2	BMSK0008921	3.8359	1.42935	114	1942	0.658	0.083	-1.4242	1.00927e-56	1.62311e-52	down	PSMB6	proteasome subunit beta type-6 [Papilio machaon]	Genetic Information Processing	Folding, sorting and degradation	ko03050//Proteasome	K02738	GO:0000502//proteasome complex;GO:0005634//nucleus;GO:0005654//nucleoplasm;GO:0005737//cytoplasm;GO:0005829//cytosol;GO:0005839//proteasome core complex;GO:0019774//proteasome core complex, beta-subunit complex;GO:0070062//extracellular exosome	GO:0004175//endopeptidase activity;GO:0004298//threonine-type endopeptidase activity;GO:0045296//cadherin binding	GO:0000165//MAPK cascade;GO:0000209//protein polyubiquitination;GO:0002223//stimulatory C-type lectin receptor signaling pathway;GO:0002479//antigen processing and presentation of exogenous peptide antigen via MHC class I, TAP-dependent;GO:0006521//regulation of cellular amino acid metabolic process;GO:0010498//proteasomal protein catabolic process;GO:0010499//proteasomal ubiquitin-independent pr…
2	BMSK0001531	3.73882	0.989508	114	1942	0.614	0.063	-1.9178	1.43037e-56	2.30032e-52	down	SCP2	sterol carrier protein x	Metabolism;Cellular Processes;Organismal Systems;Metabolism	Global and overview maps;Transport and catabolism;Endocrine system;Lipid metabolism	ko01100//Metabolic pathways;ko04146//Peroxisome;ko03320//PPAR signaling pathway;ko00120//Primary bile acid biosynthesis	K08764;K08764;K08764;K08764	GO:0005739//mitochondrion;GO:0005777//peroxisome	GO:0008289//lipid binding;GO:0033814//propanoyl-CoA C-acyltransferase activity	GO:0006869//lipid transport
2	BMSK0004810	7.56009	2.42278	114	1942	0.807	0.152	-1.64174	2.09128e-56	3.3632e-52	down	tent5c	protein FAM46C isoform X2	-	-	-	-	GO:0005634//nucleus;GO:0005737//cytoplasm	GO:0003723//RNA binding;GO:1990817//RNA adenylyltransferase activity	GO:0048255//mRNA stabilization
2	BMSK0000710	3.57123	0.411571	114	1942	0.561	0.035	-3.11721	2.41464e-56	3.88322e-52	down	-	proton-coupled amino acid transporter 1-like isoform X2	Organismal Systems	Digestive system	ko04974//Protein digestion and absorption	K14209	GO:0005886//plasma membrane;GO:0016021//integral component of membrane	GO:0015171//amino acid transmembrane transporter activity	GO:0003333//amino acid transmembrane transport;GO:0040008//regulation of growth
2	BMSK0001705	3.80203	0.411122	114	1942	0.553	0.03	-3.20913	2.56666e-56	4.12771e-52	down	ostc-a	oligosaccharyltransferase complex subunit ostc-A-like [Plutella xylostella]	-	-	-	-	GO:0016021//integral component of membrane	-	-
2	BMSK0003023	3.9769	2.03014	114	1942	0.658	0.115	-0.970066	2.69189e-56	4.3291e-52	down	Pal1	peptidyl-alpha-hydroxyglycine alpha-amidating lyase 1	Genetic Information Processing	Folding, sorting and degradation	ko03018//RNA degradation	K12597	GO:0005576//extracellular region;GO:0005886//plasma membrane;GO:0016021//integral component of membrane;GO:0043025//neuronal cell body	GO:0004504//peptidylglycine monooxygenase activity;GO:0004598//peptidylamidoglycolate lyase activity;GO:0046872//metal ion binding	GO:0001519//peptide amidation;GO:0007619//courtship behavior;GO:0044719//regulation of imaginal disc-derived wing size
2	BMSK0001925	7.29749	2.04537	114	1942	0.711	0.094	-1.83504	3.1589e-56	5.08015e-52	down	SEC61B	transport protein Sec61 beta subunit	Genetic Information Processing;Cellular Processes;Human Diseases;Genetic Information Processing	Folding, sorting and degradation;Transport and catabolism;Infectious diseases;Folding, sorting and degradation	ko04141//Protein processing in endoplasmic reticulum;ko04145//Phagosome;ko05110//Vibrio cholerae infection;ko03060//Protein export	K09481;K09481;K09481;K09481	GO:0005783//endoplasmic reticulum;GO:0005784//Sec61 translocon complex;GO:0005789//endoplasmic reticulum membrane;GO:0016021//integral component of membrane;GO:0031205//endoplasmic reticulum Sec complex	GO:0005086//ARF guanyl-nucleotide exchange factor activity;GO:0015450//P-P-bond-hydrolysis-driven protein transmembrane transporter activity;GO:0048408//epidermal growth factor binding	GO:0006616//SRP-dependent cotranslational protein targeting to membrane, translocation;GO:0030433//ER-associated ubiquitin-dependent protein catabolic process;GO:0030970//retrograde protein transport, ER to cytosol;GO:0031204//posttranslational protein targeting to membrane, translocation
2	BMSK0001430	2.32785	0.169561	114	1942	0.439	0.01	-3.77912	3.3667e-56	5.41433e-52	down	E(spl)mbeta-HLH	enhancer of split mbeta, partial	-	-	-	-	GO:0005634//nucleus	GO:0000977//RNA polymerase II regulatory region sequence-specific DNA binding;GO:0003700//transcription factor activity, sequence-specific DNA binding;GO:0003714//transcription corepressor activity;GO:0008134//transcription factor binding;GO:0043565//sequence-specific DNA binding;GO:0046983//protein dimerization activity;GO:1990837//sequence-specific double-stranded DNA binding	GO:0000122//negative regulation of transcription from RNA polymerase II promoter;GO:0001756//somitogenesis;GO:0002052//positive regulation of neuroblast proliferation;GO:0007219//Notch signaling pathway;GO:0030154//cell differentiation;GO:0050767//regulation of neurogenesis;GO:1902692//regulation of neuroblast proliferation
2	BMSK0014420	10.5557	1.65739	114	1942	0.789	0.114	-2.67104	4.05966e-56	6.52874e-52	down	-	double-stranded R -specific editase 1 isoform X2	-	-	-	-	-	-	-
2	BMSK0005520	9.31169	1.48812	114	1942	0.763	0.101	-2.64555	7.43654e-56	1.19594e-51	down	tmbim6	Bax inhibitor-1-like protein	-	-	-	-	GO:0005789//endoplasmic reticulum membrane;GO:0016021//integral component of membrane	-	GO:0006915//apoptotic process;GO:0006986//response to unfolded protein;GO:0043066//negative regulation of apoptotic process
2	BMSK0005361	6.85395	1.48615	114	1942	0.737	0.1	-2.20535	1.26131e-55	2.02844e-51	down	SMIM14	Uncharacterized protein C4orf34-like [Papilio xuthus]	-	-	-	-	-	-	-
2	BMSK0004106	4.62649	1.15521	114	1942	0.658	0.077	-2.00176	1.30034e-55	2.09121e-51	down	ATPsynB	ATP synthase	Metabolism;Organismal Systems;Human Diseases;Human Diseases;Human Diseases;Metabolism	Global and overview maps;Environmental adaptation;Neurodegenerative diseases;Neurodegenerative diseases;Neurodegenerative diseases;Energy metabolism	ko01100//Metabolic pathways;ko04714//Thermogenesis;ko05016//Huntington disease;ko05010//Alzheimer disease;ko05012//Parkinson disease;ko00190//Oxidative phosphorylation	K02127;K02127;K02127;K02127;K02127;K02127	GO:0000276//mitochondrial proton-transporting ATP synthase complex, coupling factor F(o);GO:0005739//mitochondrion	GO:0015078//hydrogen ion transmembrane transporter activity	GO:0015986//ATP synthesis coupled proton transport;GO:1902600//hydrogen ion transmembrane transport
2	BMSK0013109	2.77519	0.509266	114	1942	0.535	0.035	-2.4461	2.44776e-55	3.93649e-51	down	eca	transmembrane emp24 protein transport domain containing 9 precursor	-	-	-	-	GO:0005789//endoplasmic reticulum membrane;GO:0016021//integral component of membrane	-	GO:0009953//dorsal/ventral pattern formation
2	BMSK0002069	6.77511	2.50602	114	1942	0.789	0.151	-1.43485	3.50262e-55	5.63292e-51	down	Ahcy13	S-adenosyl-L-homocysteine hydrolase	Metabolism;Metabolism	Global and overview maps;Amino acid metabolism	ko01100//Metabolic pathways;ko00270//Cysteine and methionine metabolism	K01251;K01251	GO:0005829//cytosol	GO:0004013//adenosylhomocysteinase activity;GO:0051287//NAD binding	GO:0006730//one-carbon metabolic process;GO:0019510//S-adenosylhomocysteine catabolic process;GO:0033353//S-adenosylmethionine cycle
2	BMSK0000256	3.3478	0.586663	114	1942	0.579	0.044	-2.51261	4.2229e-55	6.79127e-51	down	Nucb1	nucleobindin-2 isoform X2	-	-	-	-	GO:0005576//extracellular region;GO:0005615//extracellular space;GO:0005634//nucleus;GO:0005737//cytoplasm;GO:0005769//early endosome;GO:0005791//rough endoplasmic reticulum;GO:0005793//endoplasmic reticulum-Golgi intermediate compartment;GO:0005794//Golgi apparatus;GO:0005798//Golgi-associated vesicle;GO:0005801//cis-Golgi network;GO:0005802//trans-Golgi network;GO:0032580//Golgi cisterna membra…	GO:0001965//G-protein alpha-subunit binding;GO:0003677//DNA binding;GO:0005509//calcium ion binding	GO:0072718//response to cisplatin;GO:1903533//regulation of protein targeting
2	BMSK0003117	15.088	4.35868	114	1942	0.947	0.238	-1.79144	7.31499e-55	1.1764e-50	down	sqd	squid protein homologue isoform X1	Organismal Systems	Development	ko04320//Dorso-ventral axis formation	K03102	GO:0000785//chromatin;GO:0005634//nucleus;GO:0005654//nucleoplasm;GO:0005703//polytene chromosome puff;GO:0005737//cytoplasm;GO:0035062//omega speckle;GO:0071011//precatalytic spliceosome;GO:0071013//catalytic step 2 spliceosome;GO:1990904//ribonucleoprotein complex	GO:0003680//AT DNA binding;GO:0003723//RNA binding;GO:0003729//mRNA binding;GO:0003730//mRNA 3'-UTR binding;GO:0035925//mRNA 3'-UTR AU-rich region binding;GO:0043565//sequence-specific DNA binding;GO:1990837//sequence-specific double-stranded DNA binding	GO:0000184//nuclear-transcribed mRNA catabolic process, nonsense-mediated decay;GO:0000381//regulation of alternative mRNA splicing, via spliceosome;GO:0000398//mRNA splicing, via spliceosome;GO:0006405//RNA export from nucleus;GO:0006406//mRNA export from nucleus;GO:0007293//germarium-derived egg chamber formation;GO:0007297//ovarian follicle cell migration;GO:0007314//oocyte anterior/posterior …
2	BMSK0007677	2.61509	0.180282	114	1942	0.447	0.011	-3.85854	8.96177e-55	1.44123e-50	down	Flt1	vascular endothelial growth factor receptor 1 isoform X1	Environmental Information Processing;Environmental Information Processing;Environmental Information Processing;Environmental Information Processing;Cellular Processes;Human Diseases;Environmental Information Processing;Human Diseases	Signal transduction;Signal transduction;Signal transduction;Signal transduction;Cellular community - eukaryotes;Cancers;Signal transduction;Immune diseases	ko04151//PI3K-Akt signaling pathway;ko04010//MAPK signaling pathway;ko04014//Ras signaling pathway;ko04015//Rap1 signaling pathway;ko04510//Focal adhesion;ko05202//Transcriptional misregulation in cancers;ko04066//HIF-1 signaling pathway;ko05323//Rheumatoid arthritis	K05096;K05096;K05096;K05096;K05096;K05096;K05096;K05096	GO:0005615//extracellular space;GO:0005634//nucleus;GO:0005768//endosome;GO:0005886//plasma membrane;GO:0005887//integral component of plasma membrane;GO:0015629//actin cytoskeleton;GO:0043235//receptor complex	GO:0004714//transmembrane receptor protein tyrosine kinase activity;GO:0005021//vascular endothelial growth factor-activated receptor activity;GO:0005524//ATP binding;GO:0019838//growth factor binding;GO:0036326//VEGF-A-activated receptor activity;GO:0036327//VEGF-B-activated receptor activity;GO:0036328//VEGF-C-activated receptor activity;GO:0036332//placental growth factor-activated receptor ac…	GO:0001525//angiogenesis;GO:0001569//patterning of blood vessels;GO:0001666//response to hypoxia;GO:0002040//sprouting angiogenesis;GO:0002548//monocyte chemotaxis;GO:0007169//transmembrane receptor protein tyrosine kinase signaling pathway;GO:0008284//positive regulation of cell proliferation;GO:0010863//positive regulation of phospholipase C activity;GO:0014068//positive regulation of phosphati…
2	BMSK0002625	2.65771	1.06507	114	1942	0.561	0.068	-1.31924	2.22467e-54	3.57772e-50	down	Tret1	facilitated trehalose transporter Tret1-like isoform X2	-	-	-	-	GO:0005886//plasma membrane;GO:0005887//integral component of plasma membrane	GO:0005351//sugar:proton symporter activity;GO:0015574//trehalose transmembrane transporter activity	GO:0015771//trehalose transport
2	BMSK0006467	4.94464	1.31445	114	1942	0.684	0.094	-1.91141	2.50908e-54	4.0351e-50	down	Leng8	leukocyte receptor cluster member 8 homolog [Amyelois transitella]	-	-	-	-	GO:0005634//nucleus	-	-
2	BMSK0001420	2.14099	0.0317989	114	1942	0.395	0.003	-6.07316	3.6148e-54	5.81333e-50	down	-	runt-related transcription factor 3	Environmental Information Processing	Signal transduction	ko04013//MAPK signaling pathway - fly	K20214	-	-	-
2	BMSK0002950	7.59751	1.39346	114	1942	0.719	0.09	-2.44686	9.38111e-54	1.50867e-49	down	PDIA3	protein disulfide-isomerase like protein ERp57 precursor	Genetic Information Processing;Human Diseases;Organismal Systems	Folding, sorting and degradation;Infectious diseases;Immune system	ko04141//Protein processing in endoplasmic reticulum;ko05163//Human cytomegalovirus infection;ko04612//Antigen processing and presentation	K08056;K08056;K08056	GO:0005615//extracellular space;GO:0005783//endoplasmic reticulum;GO:0005788//endoplasmic reticulum lumen;GO:0009986//cell surface;GO:0042470//melanosome;GO:0042824//MHC class I peptide loading complex	GO:0003756//protein disulfide isomerase activity;GO:0015037//peptide disulfide oxidoreductase activity;GO:0042802//identical protein binding	GO:0006457//protein folding;GO:0034976//response to endoplasmic reticulum stress;GO:0045454//cell redox homeostasis;GO:0098761//cellular response to interleukin-7;GO:2001238//positive regulation of extrinsic apoptotic signaling pathway
2	BMSK0004770	3.47574	0.718755	114	1942	0.561	0.049	-2.27375	9.9067e-54	1.59319e-49	down	Dredd	caspase-8	-	-	-	-	GO:0005737//cytoplasm	GO:0004197//cysteine-type endopeptidase activity;GO:0008656//cysteine-type endopeptidase activator activity involved in apoptotic process	GO:0006915//apoptotic process;GO:0045087//innate immune response;GO:0050829//defense response to Gram-negative bacterium
2	BMSK0010200	12.2604	3.82915	114	1942	0.895	0.201	-1.67891	1.59253e-53	2.56111e-49	down	-	transgelin	-	-	-	-	-	-	-
2	BMSK0012279	4.93907	0.0977563	114	1942	0.421	0.006	-5.65891	2.1275e-53	3.42145e-49	down	UPB1	aliphatic nitrilase	Metabolism;Metabolism;Metabolism;Metabolism;Metabolism	Global and overview maps;Nucleotide metabolism;Xenobiotics biodegradation and metabolism;Metabolism of other amino acids;Metabolism of cofactors and vitamins	ko01100//Metabolic pathways;ko00240//Pyrimidine metabolism;ko00983//Drug metabolism - other enzymes;ko00410//beta-Alanine metabolism;ko00770//Pantothenate and CoA biosynthesis	K01431;K01431;K01431;K01431;K01431	GO:0005737//cytoplasm	GO:0003837//beta-ureidopropionase activity	GO:0033396//beta-alanine biosynthetic process via 3-ureidopropionate;GO:0046135//pyrimidine nucleoside catabolic process;GO:0051260//protein homooligomerization
2	BMSK0005657	2.73047	0.395418	114	1942	0.491	0.024	-2.7877	2.67691e-53	4.305e-49	down	Idh1	isocitrate dehydrogenase	Metabolism;Metabolism;Cellular Processes;Metabolism;Metabolism;Metabolism;Human Diseases;Metabolism	Global and overview maps;Global and overview maps;Transport and catabolism;Global and overview maps;Metabolism of other amino acids;Carbohydrate metabolism;Cancers;Global and overview maps	ko01100//Metabolic pathways;ko01200//Carbon metabolism;ko04146//Peroxisome;ko01230//Biosynthesis of amino acids;ko00480//Glutathione metabolism;ko00020//Citrate cycle (TCA cycle);ko05230//Central carbon metabolism in cancer;ko01210//2-Oxocarboxylic acid metabolism	K00031;K00031;K00031;K00031;K00031;K00031;K00031;K00031	GO:0005739//mitochondrion;GO:0005777//peroxisome;GO:0005829//cytosol	GO:0000287//magnesium ion binding;GO:0004450//isocitrate dehydrogenase (NADP+) activity;GO:0005102//receptor binding;GO:0042803//protein homodimerization activity;GO:0050661//NADP binding;GO:0051287//NAD binding	GO:0006097//glyoxylate cycle;GO:0006099//tricarboxylic acid cycle;GO:0006102//isocitrate metabolic process;GO:0006103//2-oxoglutarate metabolic process;GO:0006739//NADP metabolic process;GO:0006749//glutathione metabolic process;GO:0006979//response to oxidative stress;GO:0008585//female gonad development;GO:0014070//response to organic cyclic compound;GO:0048545//response to steroid hormone;GO:0…
2	BMSK0011803	3.19197	0.878034	114	1942	0.561	0.051	-1.8621	2.94193e-53	4.73122e-49	down	COX6C	cytochrome c oxidase subunit 6C [Papilio xuthus]	Metabolism;Organismal Systems;Human Diseases;Human Diseases;Human Diseases;Metabolism;Human Diseases;Organismal Systems	Global and overview maps;Environmental adaptation;Neurodegenerative diseases;Neurodegenerative diseases;Neurodegenerative diseases;Energy metabolism;Endocrine and metabolic diseases;Circulatory system	ko01100//Metabolic pathways;ko04714//Thermogenesis;ko05016//Huntington disease;ko05010//Alzheimer disease;ko05012//Parkinson disease;ko00190//Oxidative phosphorylation;ko04932//Non-alcoholic fatty liver disease (NAFLD);ko04260//Cardiac muscle contraction	K02268;K02268;K02268;K02268;K02268;K02268;K02268;K02268	GO:0005743//mitochondrial inner membrane;GO:0016021//integral component of membrane	GO:0004129//cytochrome-c oxidase activity	-
2	BMSK0007127	2.59116	0.912464	114	1942	0.518	0.05	-1.50576	3.97999e-53	6.40062e-49	down	banf1-b	barrier-to-autointegration factor B	-	-	-	-	GO:0005635//nuclear envelope;GO:0005694//chromosome	GO:0003677//DNA binding	-
2	BMSK0001289	3.33042	0.468844	114	1942	0.553	0.039	-2.82852	4.50266e-53	7.24117e-49	down	-	uncharacterized protein LOC101743136	-	-	-	-	-	-	-
2	BMSK0008404	3.66493	1.10077	114	1942	0.596	0.073	-1.73527	5.28751e-53	8.50338e-49	down	Surf4	surfeit 4-like protein	-	-	-	-	GO:0005789//endoplasmic reticulum membrane;GO:0012505//endomembrane system;GO:0016021//integral component of membrane;GO:0045169//fusome	-	-
2	BMSK0010135	15.5382	3.28659	114	1942	0.798	0.13	-2.24116	7.13405e-53	1.1473e-48	down	-	BCP inhibitor precursor	-	-	-	-	-	-	-
2	BMSK0002676	8.92761	1.85056	114	1942	0.772	0.12	-2.27031	1.89024e-52	3.03988e-48	down	RAP2C	ras-related protein 2	Cellular Processes	Cellular community - eukaryotes	ko04530//Tight junction	K07839	GO:0005829//cytosol;GO:0005886//plasma membrane;GO:0005923//bicellular tight junction;GO:0044291//cell-cell contact zone;GO:0055038//recycling endosome membrane	GO:0003713//transcription coactivator activity;GO:0003924//GTPase activity;GO:0005525//GTP binding;GO:0019003//GDP binding	GO:0030336//negative regulation of cell migration;GO:0031954//positive regulation of protein autophosphorylation;GO:0032486//Rap protein signal transduction;GO:0061097//regulation of protein tyrosine kinase activity;GO:0090557//establishment of endothelial intestinal barrier
2	BMSK0009830	4.14959	0.60793	114	1942	0.57	0.043	-2.77099	1.99546e-52	3.20909e-48	down	Manf	mesencephalic astrocyte-derived neurotrophic factor homolog	-	-	-	-	GO:0005576//extracellular region;GO:0005783//endoplasmic reticulum	-	GO:0001963//synaptic transmission, dopaminergic;GO:0031175//neuron projection development;GO:0042417//dopamine metabolic process;GO:0070050//neuron cellular homeostasis
2	BMSK0009031	8.2577	2.61881	114	1942	0.807	0.157	-1.65683	2.37884e-52	3.82564e-48	down	Jafrac1	thiol peroxiredoxin isoform X1	Cellular Processes;Human Diseases	Transport and catabolism;Infectious diseases	ko04146//Peroxisome;ko05146//Amoebiasis	K13279;K13279	GO:0005829//cytosol	GO:0008379//thioredoxin peroxidase activity	GO:0006979//response to oxidative stress;GO:0007155//cell adhesion;GO:0007281//germ cell development;GO:0008340//determination of adult lifespan;GO:0008354//germ cell migration;GO:0019430//removal of superoxide radicals;GO:0042594//response to starvation;GO:0042744//hydrogen peroxide catabolic process;GO:0045321//leukocyte activation;GO:0045454//cell redox homeostasis
2	BMSK0009332	2.48068	0.491538	114	1942	0.5	0.031	-2.33536	2.38432e-52	3.83446e-48	down	Tmed2	transmembrane emp24 domain-containing protein 2 [Plutella xylostella]	-	-	-	-	GO:0005783//endoplasmic reticulum;GO:0005789//endoplasmic reticulum membrane;GO:0005793//endoplasmic reticulum-Golgi intermediate compartment;GO:0005794//Golgi apparatus;GO:0016021//integral component of membrane;GO:0030134//ER to Golgi transport vesicle;GO:0030137//COPI-coated vesicle;GO:0030663//COPI-coated vesicle membrane;GO:0032580//Golgi cisterna membrane;GO:0033116//endoplasmic reticulum-G…	-	GO:0001843//neural tube closure;GO:0001893//maternal placenta development;GO:0001947//heart looping;GO:0006886//intracellular protein transport;GO:0006888//ER to Golgi vesicle-mediated transport;GO:0006903//vesicle targeting;GO:0007030//Golgi organization;GO:0010628//positive regulation of gene expression;GO:0032525//somite rostral/caudal axis specification;GO:0034260//negative regulation of GTPa…
2	BMSK0001324	2.9705	0.608936	114	1942	0.5	0.036	-2.28634	3.69625e-52	5.94431e-48	down	Cacybp	calcyclin-binding protein [Amyelois transitella]	Environmental Information Processing	Signal transduction	ko04310//Wnt signaling pathway	K04507	GO:0005634//nucleus;GO:0005641//nuclear envelope lumen;GO:0005654//nucleoplasm;GO:0005737//cytoplasm;GO:0005829//cytosol;GO:0019005//SCF ubiquitin ligase complex;GO:0030877//beta-catenin destruction complex;GO:0043005//neuron projection;GO:0044297//cell body	GO:0015631//tubulin binding;GO:0019904//protein domain specific binding;GO:0031625//ubiquitin protein ligase binding;GO:0042803//protein homodimerization activity;GO:0044548//S100 protein binding	GO:0007507//heart development;GO:0007568//aging;GO:0045740//positive regulation of DNA replication;GO:0055007//cardiac muscle cell differentiation;GO:0060416//response to growth hormone;GO:0060548//negative regulation of cell death;GO:0071277//cellular response to calcium ion;GO:1990830//cellular response to leukemia inhibitory factor
2	BMSK0005893	1.72729	0.0498627	114	1942	0.386	0.004	-5.1144	5.97782e-52	9.61352e-48	down	-	protein toll-like [Amyelois transitella]	Organismal Systems	Immune system	ko04624//Toll and Imd signaling pathway	K18809	-	-	-
2	BMSK0008873	2.57228	0.453879	114	1942	0.5	0.034	-2.50267	8.78069e-52	1.41211e-47	down	PCYT1B	choline-phosphate cytidylyltransferase B-like isoform X3	Metabolism;Metabolism;Human Diseases;Metabolism	Global and overview maps;Lipid metabolism;Cancers;Metabolism of other amino acids	ko01100//Metabolic pathways;ko00564//Glycerophospholipid metabolism;ko05231//Choline metabolism in cancer;ko00440//Phosphonate and phosphinate metabolism	K00968;K00968;K00968;K00968	GO:0005737//cytoplasm;GO:0005789//endoplasmic reticulum membrane	GO:0004105//choline-phosphate cytidylyltransferase activity;GO:0031210//phosphatidylcholine binding	GO:0001541//ovarian follicle development;GO:0006656//phosphatidylcholine biosynthetic process;GO:0007283//spermatogenesis
2	BMSK0011580	2.8968	0.609427	114	1942	0.535	0.043	-2.24894	8.79828e-52	1.41494e-47	down	DERL1	Der1-like domain family member 1	Genetic Information Processing;Human Diseases	Folding, sorting and degradation;Neurodegenerative diseases	ko04141//Protein processing in endoplasmic reticulum;ko05014//Amyotrophic lateral sclerosis (ALS)	K11519;K11519	GO:0005769//early endosome;GO:0005770//late endosome;GO:0005785//signal recognition particle receptor complex;GO:0030176//integral component of endoplasmic reticulum membrane;GO:0036502//Derlin-1-VIMP complex;GO:0036513//Derlin-1 retrotranslocation complex;GO:0048500//signal recognition particle	GO:0031625//ubiquitin protein ligase binding;GO:0042288//MHC class I protein binding;GO:0051117//ATPase binding;GO:1990381//ubiquitin-specific protease binding	GO:0030433//ER-associated ubiquitin-dependent protein catabolic process;GO:0030968//endoplasmic reticulum unfolded protein response;GO:0030970//retrograde protein transport, ER to cytosol;GO:0031398//positive regulation of protein ubiquitination;GO:0031648//protein destabilization;GO:0032092//positive regulation of protein binding;GO:0051260//protein homooligomerization;GO:0071712//ER-associated …
2	BMSK0011280	4.49387	2.42571	114	1942	0.675	0.126	-0.889552	9.7726e-52	1.57163e-47	down	TER94	ABF51437.1 transitional endoplasmic reticulum ATPase TER94	Genetic Information Processing;Human Diseases	Folding, sorting and degradation;Infectious diseases	ko04141//Protein processing in endoplasmic reticulum;ko05134//Legionellosis	K13525;K13525	GO:0000502//proteasome complex;GO:0005634//nucleus;GO:0005737//cytoplasm;GO:0005829//cytosol;GO:0005886//plasma membrane;GO:0031965//nuclear membrane;GO:0034098//VCP-NPL4-UFD1 AAA ATPase complex;GO:0043186//P granule;GO:0044754//autolysosome;GO:0045169//fusome	GO:0005524//ATP binding;GO:0016887//ATPase activity;GO:0031593//polyubiquitin binding	GO:0000226//microtubule cytoskeleton organization;GO:0006508//proteolysis;GO:0006511//ubiquitin-dependent protein catabolic process;GO:0006530//asparagine catabolic process;GO:0007029//endoplasmic reticulum organization;GO:0007030//Golgi organization;GO:0007040//lysosome organization;GO:0007279//pole cell formation;GO:0007317//regulation of pole plasm oskar mRNA localization;GO:0016236//macroauto…
2	BMSK0014378	4.10727	0.959679	114	1942	0.596	0.064	-2.09755	1.50902e-51	2.4268e-47	down	rnf126-b	Ring finger domain	-	-	-	-	GO:0005634//nucleus;GO:0005737//cytoplasm	GO:0046872//metal ion binding;GO:0061630//ubiquitin protein ligase activity	GO:0006511//ubiquitin-dependent protein catabolic process
2	BMSK0011011	5.60236	1.36217	114	1942	0.693	0.095	-2.04013	2.61676e-51	4.20828e-47	down	blw	ATP synthase	Metabolism;Organismal Systems;Human Diseases;Human Diseases;Human Diseases;Metabolism	Global and overview maps;Environmental adaptation;Neurodegenerative diseases;Neurodegenerative diseases;Neurodegenerative diseases;Energy metabolism	ko01100//Metabolic pathways;ko04714//Thermogenesis;ko05016//Huntington disease;ko05010//Alzheimer disease;ko05012//Parkinson disease;ko00190//Oxidative phosphorylation	K02132;K02132;K02132;K02132;K02132;K02132	GO:0000275//mitochondrial proton-transporting ATP synthase complex, catalytic core F(1);GO:0005739//mitochondrion	GO:0005524//ATP binding;GO:0043531//ADP binding;GO:0046933//proton-transporting ATP synthase activity, rotational mechanism	GO:0006754//ATP biosynthetic process;GO:0006979//response to oxidative stress;GO:0015986//ATP synthesis coupled proton transport;GO:0019915//lipid storage;GO:0022900//electron transport chain;GO:0046034//ATP metabolic process;GO:1902769//regulation of choline O-acetyltransferase activity
2	BMSK0011976	1.79623	0.0143701	114	1942	0.36	0.002	-6.96575	2.62338e-51	4.21892e-47	down	SLC39A3	zinc transporter ZIP3 [Amyelois transitella]	-	-	-	-	GO:0005886//plasma membrane;GO:0016021//integral component of membrane	GO:0005385//zinc ion transmembrane transporter activity	GO:0071577//zinc II ion transmembrane transport
2	BMSK0012226	1.75067	0.0262724	114	1942	0.36	0.002	-6.05822	1.00795e-50	1.62099e-46	down	-	XP 012548782.2 uncharacterized protein LOC101743414	-	-	-	-	-	-	-
2	BMSK0012005	2.49526	0.748664	114	1942	0.482	0.045	-1.7368	1.99782e-50	3.2129e-46	down	COPE	coatomer protein complex subunit epsilon	-	-	-	-	GO:0000139//Golgi membrane;GO:0005654//nucleoplasm;GO:0030126//COPI vesicle coat	GO:0005198//structural molecule activity	GO:0006888//ER to Golgi vesicle-mediated transport;GO:0006890//retrograde vesicle-mediated transport, Golgi to ER;GO:0006891//intra-Golgi vesicle-mediated transport;GO:0015031//protein transport
2	BMSK0007870	4.37758	0.53682	114	1942	0.57	0.046	-3.02762	2.92213e-50	4.69938e-46	down	pgant6	polypeptide N-acetylgalactosaminyltransferase 10	Metabolism;Metabolism	Global and overview maps;Glycan biosynthesis and metabolism	ko01100//Metabolic pathways;ko00512//Mucin type O-glycan biosynthesis	K00710;K00710	GO:0000139//Golgi membrane;GO:0005783//endoplasmic reticulum;GO:0005794//Golgi apparatus;GO:0005795//Golgi stack;GO:0016021//integral component of membrane	GO:0004653//polypeptide N-acetylgalactosaminyltransferase activity;GO:0030246//carbohydrate binding;GO:0046872//metal ion binding	GO:0006486//protein glycosylation;GO:0009312//oligosaccharide biosynthetic process
2	BMSK0002025	2.32059	0.74312	114	1942	0.474	0.036	-1.64282	3.08379e-50	4.95934e-46	down	Rpn7	26S proteasome non-ATPase regulatory subunit 6	Human Diseases;Genetic Information Processing	Infectious diseases;Folding, sorting and degradation	ko05169//Epstein-Barr virus infection;ko03050//Proteasome	K03037;K03037	GO:0000502//proteasome complex;GO:0005654//nucleoplasm;GO:0005829//cytosol;GO:0005838//proteasome regulatory particle;GO:0008541//proteasome regulatory particle, lid subcomplex	GO:0030234//enzyme regulator activity	GO:0007623//circadian rhythm;GO:0008063//Toll signaling pathway;GO:0043161//proteasome-mediated ubiquitin-dependent protein catabolic process
2	BMSK0007992	1.87156	0.0840215	114	1942	0.395	0.007	-4.47734	3.57829e-50	5.7546e-46	down	ABCA7	uncharacterized protein LOC101740576	-	-	-	-	GO:0000139//Golgi membrane;GO:0001891//phagocytic cup;GO:0005783//endoplasmic reticulum;GO:0005794//Golgi apparatus;GO:0005886//plasma membrane;GO:0009986//cell surface;GO:0016021//integral component of membrane;GO:0030054//cell junction;GO:0031901//early endosome membrane;GO:0032587//ruffle membrane;GO:0043190//ATP-binding cassette (ABC) transporter complex;GO:0043231//intracellular membrane-bou…	GO:0005215//transporter activity;GO:0005319//lipid transporter activity;GO:0005524//ATP binding;GO:0016887//ATPase activity;GO:0034188//apolipoprotein A-I receptor activity;GO:0042626//ATPase activity, coupled to transmembrane movement of substances;GO:0090554//phosphatidylcholine-translocating ATPase activity;GO:0090556//phosphatidylserine-translocating ATPase activity	GO:0006869//lipid transport;GO:0006909//phagocytosis;GO:0007613//memory;GO:0010875//positive regulation of cholesterol efflux;GO:0018149//peptide cross-linking;GO:0033344//cholesterol efflux;GO:0033700//phospholipid efflux;GO:0034205//beta-amyloid formation;GO:0034380//high-density lipoprotein particle assembly;GO:0034504//protein localization to nucleus;GO:0038027//apolipoprotein A-I-mediated si…
2	BMSK0010705	4.32156	1.32543	114	1942	0.649	0.09	-1.7051	4.73258e-50	7.61093e-46	down	-	vacuolar ATP synthase subunit D	Metabolism;Human Diseases;Metabolism;Environmental Information Processing;Cellular Processes;Human Diseases;Human Diseases;Organismal Systems;Human Diseases;Organismal Systems	Global and overview maps;Infectious diseases;Energy metabolism;Signal transduction;Transport and catabolism;Infectious diseases;Infectious diseases;Nervous system;Immune diseases;Excretory system	ko01100//Metabolic pathways;ko05165//Human papillomavirus infection;ko00190//Oxidative phosphorylation;ko04150//mTOR signaling pathway;ko04145//Phagosome;ko05110//Vibrio cholerae infection;ko05120//Epithelial cell signaling in Helicobacter pylori infection;ko04721//Synaptic vesicle cycle;ko05323//Rheumatoid arthritis;ko04966//Collecting duct acid secretion	K02149;K02149;K02149;K02149;K02149;K02149;K02149;K02149;K02149;K02149	-	GO:0042626//ATPase activity, coupled to transmembrane movement of substances	GO:0006811//ion transport
2	BMSK0008393	9.02527	1.99204	114	1942	0.728	0.11	-2.17972	5.01386e-50	8.06328e-46	down	Hsc70-3	heat shock 70 kD protein cognate isoform X1	Genetic Information Processing;Organismal Systems;Organismal Systems;Human Diseases;Genetic Information Processing	Folding, sorting and degradation;Endocrine system;Immune system;Neurodegenerative diseases;Folding, sorting and degradation	ko04141//Protein processing in endoplasmic reticulum;ko04918//Thyroid hormone synthesis;ko04612//Antigen processing and presentation;ko05020//Prion diseases;ko03060//Protein export	K09490;K09490;K09490;K09490;K09490	GO:0005615//extracellular space;GO:0005634//nucleus;GO:0005737//cytoplasm;GO:0005783//endoplasmic reticulum;GO:0005788//endoplasmic reticulum lumen;GO:0012505//endomembrane system;GO:0016020//membrane;GO:0034663//endoplasmic reticulum chaperone complex	GO:0005524//ATP binding;GO:0016887//ATPase activity;GO:0031072//heat shock protein binding;GO:0042623//ATPase activity, coupled;GO:0044183//protein binding involved in protein folding;GO:0051082//unfolded protein binding;GO:0051787//misfolded protein binding	GO:0006986//response to unfolded protein;GO:0016246//RNA interference;GO:0030431//sleep;GO:0030433//ER-associated ubiquitin-dependent protein catabolic process;GO:0030968//endoplasmic reticulum unfolded protein response;GO:0034605//cellular response to heat;GO:0034620//cellular response to unfolded protein;GO:0034976//response to endoplasmic reticulum stress;GO:0036335//intestinal stem cell homeo…
2	BMSK0001916	2.33637	0.329015	114	1942	0.474	0.027	-2.82804	6.40387e-50	1.02987e-45	down	SLC9B2	mitochondrial sodium/hydrogen exchanger 9B2 isoform X1	-	-	-	-	GO:0005743//mitochondrial inner membrane;GO:0005886//plasma membrane;GO:0010008//endosome membrane;GO:0016021//integral component of membrane;GO:0016323//basolateral plasma membrane;GO:0016324//apical plasma membrane;GO:0030054//cell junction;GO:0030672//synaptic vesicle membrane;GO:0031966//mitochondrial membrane;GO:0097228//sperm principal piece	GO:0005451//monovalent cation:proton antiporter activity;GO:0010348//lithium:proton antiporter activity;GO:0015385//sodium:proton antiporter activity;GO:0042802//identical protein binding	GO:0006814//sodium ion transport;GO:0030317//sperm motility;GO:0034220//ion transmembrane transport;GO:0061178//regulation of insulin secretion involved in cellular response to glucose stimulus;GO:0072583//clathrin-mediated endocytosis;GO:2001206//positive regulation of osteoclast development
2	BMSK0013215	4.97905	2.30401	114	1942	0.693	0.127	-1.11172	7.34847e-50	1.18178e-45	down	Ggamma1	guanine nucleotide-binding protein subunit gamma-1 [Amyelois transitella]	-	-	-	-	GO:0005834//heterotrimeric G-protein complex	GO:0003924//GTPase activity	GO:0003015//heart process;GO:0003380//establishment or maintenance of cytoskeleton polarity involved in gastrulation;GO:0007186//G-protein coupled receptor signaling pathway;GO:0007391//dorsal closure;GO:0007637//proboscis extension reflex;GO:0010470//regulation of gastrulation;GO:0035050//embryonic heart tube development;GO:0043519//regulation of myosin II filament organization;GO:0045176//apica…
2	BMSK0000297	4.86068	1.06459	114	1942	0.623	0.074	-2.19086	1.03279e-49	1.66093e-45	down	-	probable citrate synthase 2, mitochondrial	Metabolism;Metabolism;Metabolism;Metabolism;Metabolism;Metabolism	Global and overview maps;Global and overview maps;Global and overview maps;Carbohydrate metabolism;Carbohydrate metabolism;Global and overview maps	ko01100//Metabolic pathways;ko01200//Carbon metabolism;ko01230//Biosynthesis of amino acids;ko00020//Citrate cycle (TCA cycle);ko00630//Glyoxylate and dicarboxylate metabolism;ko01210//2-Oxocarboxylic acid metabolism	K01647;K01647;K01647;K01647;K01647;K01647	GO:0005759//mitochondrial matrix	GO:0004108//citrate (Si)-synthase activity	GO:0005975//carbohydrate metabolic process;GO:0006099//tricarboxylic acid cycle;GO:0006101//citrate metabolic process
2	BMSK0013529	2.20273	0.363559	114	1942	0.456	0.024	-2.59903	1.25424e-49	2.01707e-45	down	dj-1beta	XP 012549714.1 DJ-1 beta isoform X2	Human Diseases	Neurodegenerative diseases	ko05012//Parkinson disease	K05687	GO:0005634//nucleus;GO:0005829//cytosol	GO:0016684//oxidoreductase activity, acting on peroxide as acceptor	GO:0006979//response to oxidative stress;GO:0008344//adult locomotory behavior;GO:0008345//larval locomotory behavior;GO:0010310//regulation of hydrogen peroxide metabolic process;GO:0014065//phosphatidylinositol 3-kinase signaling;GO:0034614//cellular response to reactive oxygen species;GO:0048167//regulation of synaptic plasticity;GO:0048640//negative regulation of developmental growth;GO:19000…
2	BMSK0007167	2.75251	0.160332	114	1942	0.439	0.014	-4.10162	1.55194e-49	2.49583e-45	down	-	vegetative cell wall protein gp1	-	-	-	-	-	-	-
2	BMSK0009367	4.88503	2.67179	114	1942	0.693	0.152	-0.870562	1.78997e-49	2.87863e-45	down	sqh	myosin light polypeptide 9 isoform X1	Cellular Processes;Cellular Processes;Cellular Processes;Organismal Systems;Organismal Systems	Cell motility;Cellular community - eukaryotes;Cellular community - eukaryotes;Immune system;Immune system	ko04810//Regulation of actin cytoskeleton;ko04510//Focal adhesion;ko04530//Tight junction;ko04611//Platelet activation;ko04670//Leukocyte transendothelial migration	K12757;K12757;K12757;K12757;K12757	GO:0005737//cytoplasm;GO:0005829//cytosol;GO:0005886//plasma membrane;GO:0005938//cell cortex;GO:0016324//apical plasma membrane;GO:0016460//myosin II complex;GO:0030496//midbody;GO:0032154//cleavage furrow;GO:0035183//female germline ring canal inner rim;GO:0045177//apical part of cell;GO:0045179//apical cortex;GO:0051233//spindle midzone;GO:1903144//actomyosin contractile ring actin filament	GO:0005509//calcium ion binding;GO:0032036//myosin heavy chain binding	GO:0000281//mitotic cytokinesis;GO:0001736//establishment of planar polarity;GO:0003384//apical constriction involved in gastrulation;GO:0007298//border follicle cell migration;GO:0007300//ovarian nurse cell to oocyte transport;GO:0019749//cytoskeleton-dependent cytoplasmic transport, nurse cell to oocyte;GO:0030048//actin filament-based movement;GO:0030707//ovarian follicle cell development;GO:0…
2	BMSK0006871	2.42329	0.151632	114	1942	0.421	0.011	-3.99832	2.1687e-49	3.48771e-45	down	ITGA9	integrin alpha3	-	-	-	-	GO:0005886//plasma membrane;GO:0008305//integrin complex;GO:0009925//basal plasma membrane;GO:0034679//integrin alpha9-beta1 complex	GO:0005518//collagen binding;GO:0043236//laminin binding;GO:0046872//metal ion binding	GO:0007155//cell adhesion;GO:0007229//integrin-mediated signaling pathway;GO:0030198//extracellular matrix organization;GO:0030593//neutrophil chemotaxis;GO:0042060//wound healing
2	BMSK0007861	3.68725	1.17276	114	1942	0.579	0.067	-1.65264	4.63503e-49	7.45405e-45	down	Clc	clathrin light chain isoform X1	-	-	-	-	GO:0005737//cytoplasm;GO:0005886//plasma membrane;GO:0005938//cell cortex;GO:0030125//clathrin vesicle coat;GO:0030130//clathrin coat of trans-Golgi network vesicle;GO:0030132//clathrin coat of coated pit;GO:0030136//clathrin-coated vesicle;GO:0030672//synaptic vesicle membrane;GO:0071439//clathrin complex;GO:0072686//mitotic spindle	GO:0005198//structural molecule activity;GO:0032050//clathrin heavy chain binding	GO:0006886//intracellular protein transport;GO:0048268//clathrin coat assembly;GO:0072583//clathrin-mediated endocytosis
2	BMSK0011671	13.16	5.29496	114	1942	0.921	0.26	-1.31347	8.87634e-49	1.42749e-44	down	FKBP1A	ABF51286.1 FK506-binding protein	-	-	-	-	GO:0005737//cytoplasm;GO:0005829//cytosol;GO:0016020//membrane;GO:0016529//sarcoplasmic reticulum;GO:0030018//Z disc;GO:0031312//extrinsic component of organelle membrane;GO:0033017//sarcoplasmic reticulum membrane;GO:0070062//extracellular exosome;GO:0098562//cytoplasmic side of membrane;GO:1990425//ryanodine receptor complex	GO:0003755//peptidyl-prolyl cis-trans isomerase activity;GO:0005528//FK506 binding;GO:0008144//drug binding;GO:0019855//calcium channel inhibitor activity;GO:0042803//protein homodimerization activity;GO:0044325//ion channel binding;GO:0046332//SMAD binding;GO:0048185//activin binding	GO:0000413//protein peptidyl-prolyl isomerization;GO:0001933//negative regulation of protein phosphorylation;GO:0003007//heart morphogenesis;GO:0006936//muscle contraction;GO:0007183//SMAD protein complex assembly;GO:0019221//cytokine-mediated signaling pathway;GO:0031000//response to caffeine;GO:0031398//positive regulation of protein ubiquitination;GO:0032092//positive regulation of protein bin…
2	BMSK0012073	6.52338	4.63515	114	1942	0.781	0.235	-0.493004	1.02252e-48	1.64442e-44	down	FKBP46	AAY86706.1 45 kDa immunophilin FKBP45	-	-	-	-	GO:0005634//nucleus	GO:0003677//DNA binding;GO:0003755//peptidyl-prolyl cis-trans isomerase activity	-
2	BMSK0000108	8.62735	2.14245	114	1942	0.746	0.133	-2.00966	1.0765e-48	1.73123e-44	down	LanB2	laminin subunit gamma-1	Human Diseases;Human Diseases;Environmental Information Processing;Cellular Processes;Human Diseases;Human Diseases;Human Diseases;Environmental Information Processing;Human Diseases	Cancers;Infectious diseases;Signal transduction;Cellular community - eukaryotes;Infectious diseases;Cancers;Infectious diseases;Signaling molecules and interaction;Neurodegenerative diseases	ko05200//Pathways in cancer;ko05165//Human papillomavirus infection;ko04151//PI3K-Akt signaling pathway;ko04510//Focal adhesion;ko05145//Toxoplasmosis;ko05222//Small cell lung cancer;ko05146//Amoebiasis;ko04512//ECM-receptor interaction;ko05020//Prion diseases	K05635;K05635;K05635;K05635;K05635;K05635;K05635;K05635;K05635	GO:0005604//basement membrane	-	GO:0007435//salivary gland morphogenesis;GO:0007494//midgut development;GO:0033627//cell adhesion mediated by integrin;GO:0034446//substrate adhesion-dependent cell spreading;GO:0061031//endodermal digestive tract morphogenesis;GO:0070831//basement membrane assembly;GO:0071711//basement membrane organization;GO:0085029//extracellular matrix assembly
2	BMSK0002107	2.59202	0.0261387	114	1942	0.325	0.001	-6.63174	1.15947e-48	1.86467e-44	down	MKX	homeobox protein Mohawk isoform X1	-	-	-	-	GO:0005634//nucleus	GO:0000981//RNA polymerase II transcription factor activity, sequence-specific DNA binding;GO:0043565//sequence-specific DNA binding	GO:0007517//muscle organ development
2	BMSK0005120	3.07816	0.637073	114	1942	0.518	0.044	-2.27254	1.30792e-48	2.10339e-44	down	Cisd2	CDGSH iron-sulfur domain-containing protein 2 homolog	-	-	-	-	GO:0005789//endoplasmic reticulum membrane;GO:0016021//integral component of membrane	GO:0046872//metal ion binding;GO:0051537//2 iron, 2 sulfur cluster binding	-
2	BMSK0002948	2.71454	0.347778	114	1942	0.456	0.024	-2.96447	1.6764e-48	2.69598e-44	down	-	TNFSF5	-	-	-	-	-	-	-
2	BMSK0003306	4.07943	1.62582	114	1942	0.623	0.1	-1.3272	1.76513e-48	2.83868e-44	down	HNRNP	heterogeneous nuclear ribonucleoprotein A1	Genetic Information Processing	Transcription	ko03040//Spliceosome	K12741	GO:0005634//nucleus	GO:0003723//RNA binding	-
2	BMSK0013110	2.33116	0.16838	114	1942	0.412	0.012	-3.79125	3.94608e-48	6.34609e-44	down	-	XP 012545246.1 DDRGK domain-containing protein 1 isoform X1	-	-	-	-	-	-	-
2	BMSK0007594	2.44939	0.790546	114	1942	0.482	0.047	-1.6315	5.37829e-48	8.64936e-44	down	Taldo1	transaldolase	Metabolism;Metabolism;Metabolism;Metabolism	Global and overview maps;Global and overview maps;Global and overview maps;Carbohydrate metabolism	ko01100//Metabolic pathways;ko01200//Carbon metabolism;ko01230//Biosynthesis of amino acids;ko00030//Pentose phosphate pathway	K00616;K00616;K00616;K00616	GO:0005654//nucleoplasm;GO:0005829//cytosol;GO:0043231//intracellular membrane-bounded organelle	GO:0004801//sedoheptulose-7-phosphate:D-glyceraldehyde-3-phosphate glyceronetransferase activity;GO:0030246//carbohydrate binding;GO:0048029//monosaccharide binding	GO:0005975//carbohydrate metabolic process;GO:0006002//fructose 6-phosphate metabolic process;GO:0006098//pentose-phosphate shunt;GO:0009052//pentose-phosphate shunt, non-oxidative branch;GO:0019682//glyceraldehyde-3-phosphate metabolic process
2	BMSK0009160	3.43758	1.16293	114	1942	0.579	0.079	-1.56363	5.90263e-48	9.49261e-44	down	MDH2	malate dehydrogenase, mitochondrial [Amyelois transitella]	Metabolism;Metabolism;Metabolism;Metabolism;Metabolism;Metabolism	Global and overview maps;Global and overview maps;Carbohydrate metabolism;Amino acid metabolism;Carbohydrate metabolism;Carbohydrate metabolism	ko01100//Metabolic pathways;ko01200//Carbon metabolism;ko00020//Citrate cycle (TCA cycle);ko00270//Cysteine and methionine metabolism;ko00630//Glyoxylate and dicarboxylate metabolism;ko00620//Pyruvate metabolism	K00026;K00026;K00026;K00026;K00026;K00026	GO:0005634//nucleus;GO:0005739//mitochondrion;GO:0005759//mitochondrial matrix;GO:0016020//membrane;GO:0070062//extracellular exosome	GO:0003723//RNA binding;GO:0030060//L-malate dehydrogenase activity;GO:0043621//protein self-association;GO:0046554//malate dehydrogenase (NADP+) activity	GO:0006094//gluconeogenesis;GO:0006099//tricarboxylic acid cycle;GO:0006107//oxaloacetate metabolic process;GO:0006108//malate metabolic process;GO:0006475//internal protein amino acid acetylation;GO:0006734//NADH metabolic process;GO:0009060//aerobic respiration
2	BMSK0001804	2.97955	0.96497	114	1942	0.526	0.059	-1.62654	9.15396e-48	1.47214e-43	down	l(2)37Cc	prohibitin protein WPH isoform X1	-	-	-	-	GO:0005739//mitochondrion;GO:0016020//membrane	-	GO:0007275//multicellular organism development;GO:0071456//cellular response to hypoxia
2	BMSK0011296	2.26958	0.401983	114	1942	0.456	0.025	-2.49722	1.12295e-47	1.80593e-43	down	-	XP 004922464.1 DH dehydrogenase [ubiquinone] iron-sulfur protein 5-like	Metabolism;Organismal Systems;Human Diseases;Human Diseases;Human Diseases;Metabolism;Human Diseases;Organismal Systems	Global and overview maps;Environmental adaptation;Neurodegenerative diseases;Neurodegenerative diseases;Neurodegenerative diseases;Energy metabolism;Endocrine and metabolic diseases;Nervous system	ko01100//Metabolic pathways;ko04714//Thermogenesis;ko05016//Huntington disease;ko05010//Alzheimer disease;ko05012//Parkinson disease;ko00190//Oxidative phosphorylation;ko04932//Non-alcoholic fatty liver disease (NAFLD);ko04723//Retrograde endocannabinoid signaling	K03938;K03938;K03938;K03938;K03938;K03938;K03938;K03938	-	-	-
2	BMSK0007547	2.7059	0.847027	114	1942	0.482	0.046	-1.67563	1.37662e-47	2.21388e-43	down	-	eukaryotic translation initiation factor 3 subunit M [Amyelois transitella]	-	-	-	-	GO:0016282//eukaryotic 43S preinitiation complex;GO:0033290//eukaryotic 48S preinitiation complex;GO:0071541//eukaryotic translation initiation factor 3 complex, eIF3m	GO:0003743//translation initiation factor activity	GO:0001732//formation of cytoplasmic translation initiation complex
2	BMSK0001957	4.29807	1.96067	114	1942	0.658	0.123	-1.13234	1.97691e-47	3.17926e-43	down	Chd7	chromodomain-helicase-D -binding protein 7 isoform X1 [Amyelois transitella]	-	-	-	-	GO:0005634//nucleus;GO:0005654//nucleoplasm;GO:0005730//nucleolus	GO:0000978//RNA polymerase II core promoter proximal region sequence-specific DNA binding;GO:0004386//helicase activity;GO:0005524//ATP binding;GO:1990841//promoter-specific chromatin binding	GO:0001501//skeletal system development;GO:0001568//blood vessel development;GO:0001701//in utero embryonic development;GO:0001974//blood vessel remodeling;GO:0003007//heart morphogenesis;GO:0003222//ventricular trabecula myocardium morphogenesis;GO:0003226//right ventricular compact myocardium morphogenesis;GO:0006338//chromatin remodeling;GO:0006364//rRNA processing;GO:0007417//central nervous …
2	BMSK0015783	2.71453	0.815279	114	1942	0.518	0.06	-1.73533	2.31703e-47	3.72624e-43	down	-	XP 021208504.1 vacuolar ATPase subunit C isoform X1	Metabolism;Human Diseases;Metabolism;Environmental Information Processing;Cellular Processes;Human Diseases;Human Diseases;Organismal Systems;Human Diseases;Organismal Systems	Global and overview maps;Infectious diseases;Energy metabolism;Signal transduction;Transport and catabolism;Infectious diseases;Infectious diseases;Nervous system;Immune diseases;Excretory system	ko01100//Metabolic pathways;ko05165//Human papillomavirus infection;ko00190//Oxidative phosphorylation;ko04150//mTOR signaling pathway;ko04145//Phagosome;ko05110//Vibrio cholerae infection;ko05120//Epithelial cell signaling in Helicobacter pylori infection;ko04721//Synaptic vesicle cycle;ko05323//Rheumatoid arthritis;ko04966//Collecting duct acid secretion	K02148;K02148;K02148;K02148;K02148;K02148;K02148;K02148;K02148;K02148	GO:0033180//proton-transporting V-type ATPase, V1 domain	GO:0015078//hydrogen ion transmembrane transporter activity	GO:0015991//ATP hydrolysis coupled proton transport
2	BMSK0007681	4.02759	1.57481	114	1942	0.614	0.092	-1.35474	2.68348e-47	4.31557e-43	down	Pomp	proteasome maturation protein	Genetic Information Processing	Folding, sorting and degradation	ko03050//Proteasome	K11599	GO:0005634//nucleus;GO:0005737//cytoplasm;GO:0005783//endoplasmic reticulum;GO:0005829//cytosol;GO:0016607//nuclear speck;GO:0031090//organelle membrane	-	GO:0043248//proteasome assembly
2	BMSK0010703	1.56076	0.0884238	114	1942	0.386	0.008	-4.14167	2.77022e-47	4.45506e-43	down	-	uncharacterized protein LOC105662428 [Megachile rotundata]	-	-	-	-	-	-	-
2	BMSK0011014	3.38835	2.25924	114	1942	0.596	0.127	-0.584742	2.87082e-47	4.61686e-43	down	Aldh3a1	aldehyde dehydrogenase isoform 1	Metabolism;Metabolism;Metabolism;Metabolism;Metabolism;Metabolism;Metabolism;Metabolism;Metabolism;Metabolism;Metabolism;Metabolism;Metabolism	Global and overview maps;Lipid metabolism;Carbohydrate metabolism;Amino acid metabolism;Amino acid metabolism;Carbohydrate metabolism;Lipid metabolism;Amino acid metabolism;Carbohydrate metabolism;Amino acid metabolism;Metabolism of terpenoids and polyketides;Metabolism of other amino acids;Amino acid metabolism	ko01100//Metabolic pathways;ko00561//Glycerolipid metabolism;ko00010//Glycolysis / Gluconeogenesis;ko00310//Lysine degradation;ko00280//Valine, leucine and isoleucine degradation;ko00620//Pyruvate metabolism;ko00071//Fatty acid degradation;ko00380//Tryptophan metabolism;ko00053//Ascorbate and aldarate metabolism;ko00330//Arginine and proline metabolism;ko00981//Insect hormone biosynthesis;ko00410…	K00128;K00128;K00128;K00128;K00128;K00128;K00128;K00128;K00128;K00128;K00128;K00128;K00128	GO:0005737//cytoplasm;GO:0005783//endoplasmic reticulum;GO:0005829//cytosol;GO:0005886//plasma membrane;GO:0016021//integral component of membrane	GO:0004028//3-chloroallyl aldehyde dehydrogenase activity;GO:0004029//aldehyde dehydrogenase (NAD) activity;GO:0004030//aldehyde dehydrogenase [NAD(P)+] activity;GO:0008106//alcohol dehydrogenase (NADP+) activity;GO:0018479//benzaldehyde dehydrogenase (NAD+) activity	GO:0001666//response to hypoxia;GO:0006081//cellular aldehyde metabolic process;GO:0007568//aging;GO:0007584//response to nutrient;GO:0008284//positive regulation of cell proliferation;GO:0014070//response to organic cyclic compound;GO:0042493//response to drug;GO:0051384//response to glucocorticoid;GO:0051591//response to cAMP;GO:0055114//oxidation-reduction process
2	BMSK0010240	3.16181	1.00152	114	1942	0.57	0.074	-1.65857	2.98021e-47	4.79277e-43	down	eIF3-S9	eukaryotic translation initiation factor 3 subunit B	Genetic Information Processing	Translation	ko03013//RNA transport	K03253	GO:0005852//eukaryotic translation initiation factor 3 complex;GO:0016282//eukaryotic 43S preinitiation complex;GO:0033290//eukaryotic 48S preinitiation complex	GO:0003743//translation initiation factor activity;GO:0031369//translation initiation factor binding	GO:0001732//formation of cytoplasmic translation initiation complex;GO:0006446//regulation of translational initiation
2	BMSK0004556	3.04502	1.11943	114	1942	0.518	0.059	-1.44368	3.08106e-47	4.95496e-43	down	-	nuclear protein 1	Human Diseases	Cancers	ko05202//Transcriptional misregulation in cancers	K15626	-	-	-
2	BMSK0015580	1.54687	0.0523567	114	1942	0.368	0.005	-4.88484	3.14437e-47	5.05678e-43	down	PROC1	XP 004926868.1 pyrroline-5-carboxylate reductase isoform X2	Metabolism;Metabolism;Metabolism	Global and overview maps;Global and overview maps;Amino acid metabolism	ko01100//Metabolic pathways;ko01230//Biosynthesis of amino acids;ko00330//Arginine and proline metabolism	K00286;K00286;K00286	GO:0005618//cell wall;GO:0005737//cytoplasm	GO:0004735//pyrroline-5-carboxylate reductase activity	GO:0009408//response to heat;GO:0009651//response to salt stress;GO:0055129//L-proline biosynthetic process
2	BMSK0004694	2.93157	1.62813	114	1942	0.544	0.099	-0.848453	3.37576e-47	5.4289e-43	down	-	Broad-Complex isoform Z3, partial	-	-	-	-	-	-	-
2	BMSK0003060	4.46632	1.56386	114	1942	0.632	0.097	-1.51397	3.80509e-47	6.11934e-43	down	COX5A	cytochrome c oxidase subunit Va	Metabolism;Organismal Systems;Human Diseases;Human Diseases;Human Diseases;Metabolism;Human Diseases;Organismal Systems	Global and overview maps;Environmental adaptation;Neurodegenerative diseases;Neurodegenerative diseases;Neurodegenerative diseases;Energy metabolism;Endocrine and metabolic diseases;Circulatory system	ko01100//Metabolic pathways;ko04714//Thermogenesis;ko05016//Huntington disease;ko05010//Alzheimer disease;ko05012//Parkinson disease;ko00190//Oxidative phosphorylation;ko04932//Non-alcoholic fatty liver disease (NAFLD);ko04260//Cardiac muscle contraction	K02264;K02264;K02264;K02264;K02264;K02264;K02264;K02264	GO:0005739//mitochondrion;GO:0005751//mitochondrial respiratory chain complex IV	GO:0004129//cytochrome-c oxidase activity;GO:0046872//metal ion binding	GO:0006123//mitochondrial electron transport, cytochrome c to oxygen;GO:0007406//negative regulation of neuroblast proliferation;GO:0045787//positive regulation of cell cycle
2	BMSK0009675	7.52723	2.97817	114	1942	0.772	0.173	-1.33769	3.863e-47	6.21248e-43	down	14-3-3epsilon	tyrosine 3-monooxygenase/tryptophan 5-monooxygenase activation protein epsilon polypeptide	Human Diseases;Human Diseases;Environmental Information Processing;Cellular Processes;Cellular Processes;Environmental Information Processing;Environmental Information Processing;Organismal Systems	Infectious diseases;Cancers;Signal transduction;Cell growth and death;Cell growth and death;Signal transduction;Signal transduction;Nervous system	ko05169//Epstein-Barr virus infection;ko05203//Viral carcinogenesis;ko04151//PI3K-Akt signaling pathway;ko04114//Oocyte meiosis;ko04110//Cell cycle;ko04390//Hippo signaling pathway;ko04391//Hippo signaling pathway -fly;ko04722//Neurotrophin signaling pathway	K06630;K06630;K06630;K06630;K06630;K06630;K06630;K06630	GO:0005634//nucleus;GO:0005654//nucleoplasm;GO:0005694//chromosome;GO:0005737//cytoplasm;GO:0005813//centrosome;GO:0005829//cytosol;GO:0005886//plasma membrane;GO:0045172//germline ring canal	GO:0008134//transcription factor binding;GO:0019904//protein domain specific binding;GO:0046982//protein heterodimerization activity;GO:0050815//phosphoserine binding	GO:0000077//DNA damage checkpoint;GO:0007088//regulation of mitotic nuclear division;GO:0007093//mitotic cell cycle checkpoint;GO:0007280//pole cell migration;GO:0007294//germarium-derived oocyte fate determination;GO:0007411//axon guidance;GO:0007444//imaginal disc development;GO:0007623//circadian rhythm;GO:0008103//oocyte microtubule cytoskeleton polarization;GO:0008340//determination of adult…
2	BMSK0011425	7.07092	2.36525	114	1942	0.728	0.135	-1.57991	3.96729e-47	6.38019e-43	down	-	vacuolar ATP synthase subunit G	Metabolism;Human Diseases;Metabolism;Environmental Information Processing;Cellular Processes;Human Diseases;Human Diseases;Organismal Systems;Human Diseases;Organismal Systems	Global and overview maps;Infectious diseases;Energy metabolism;Signal transduction;Transport and catabolism;Infectious diseases;Infectious diseases;Nervous system;Immune diseases;Excretory system	ko01100//Metabolic pathways;ko05165//Human papillomavirus infection;ko00190//Oxidative phosphorylation;ko04150//mTOR signaling pathway;ko04145//Phagosome;ko05110//Vibrio cholerae infection;ko05120//Epithelial cell signaling in Helicobacter pylori infection;ko04721//Synaptic vesicle cycle;ko05323//Rheumatoid arthritis;ko04966//Collecting duct acid secretion	K02152;K02152;K02152;K02152;K02152;K02152;K02152;K02152;K02152;K02152	GO:0016324//apical plasma membrane;GO:0016471//vacuolar proton-transporting V-type ATPase complex	GO:0042626//ATPase activity, coupled to transmembrane movement of substances	GO:1902600//hydrogen ion transmembrane transport
2	BMSK0005817	2.09554	0.261421	114	1942	0.447	0.023	-3.00288	4.36374e-47	7.01776e-43	down	Ost48	dolichyl-diphosphooligosaccharide protein glycotransferase precursor	Metabolism;Genetic Information Processing;Metabolism	Global and overview maps;Folding, sorting and degradation;Glycan biosynthesis and metabolism	ko01100//Metabolic pathways;ko04141//Protein processing in endoplasmic reticulum;ko00510//N-Glycan biosynthesis	K12670;K12670;K12670	GO:0005783//endoplasmic reticulum;GO:0008250//oligosaccharyltransferase complex;GO:0012505//endomembrane system;GO:0016021//integral component of membrane	-	GO:0007030//Golgi organization;GO:0018279//protein N-linked glycosylation via asparagine;GO:0034389//lipid particle organization
2	BMSK0000857	2.13585	0.337307	114	1942	0.43	0.021	-2.66268	4.52237e-47	7.27288e-43	down	COX7C	cytochrome c oxidase subunit 7C, mitochondrial-like [Plutella xylostella]	Metabolism;Organismal Systems;Human Diseases;Human Diseases;Human Diseases;Metabolism;Human Diseases;Organismal Systems	Global and overview maps;Environmental adaptation;Neurodegenerative diseases;Neurodegenerative diseases;Neurodegenerative diseases;Energy metabolism;Endocrine and metabolic diseases;Circulatory system	ko01100//Metabolic pathways;ko04714//Thermogenesis;ko05016//Huntington disease;ko05010//Alzheimer disease;ko05012//Parkinson disease;ko00190//Oxidative phosphorylation;ko04932//Non-alcoholic fatty liver disease (NAFLD);ko04260//Cardiac muscle contraction	K02272;K02272;K02272;K02272;K02272;K02272;K02272;K02272	GO:0005743//mitochondrial inner membrane;GO:0016021//integral component of membrane	GO:0004129//cytochrome-c oxidase activity	-
2	BMSK0002869	2.4482	0.834676	114	1942	0.491	0.048	-1.55243	4.78274e-47	7.6916e-43	down	UQCRB	ubiquinol-cytochrome C reductase complex 14kD subunit	Metabolism;Organismal Systems;Human Diseases;Human Diseases;Human Diseases;Metabolism;Human Diseases;Organismal Systems	Global and overview maps;Environmental adaptation;Neurodegenerative diseases;Neurodegenerative diseases;Neurodegenerative diseases;Energy metabolism;Endocrine and metabolic diseases;Circulatory system	ko01100//Metabolic pathways;ko04714//Thermogenesis;ko05016//Huntington disease;ko05010//Alzheimer disease;ko05012//Parkinson disease;ko00190//Oxidative phosphorylation;ko04932//Non-alcoholic fatty liver disease (NAFLD);ko04260//Cardiac muscle contraction	K00417;K00417;K00417;K00417;K00417;K00417;K00417;K00417	GO:0005750//mitochondrial respiratory chain complex III	-	GO:0006122//mitochondrial electron transport, ubiquinol to cytochrome c;GO:0009060//aerobic respiration;GO:0034551//mitochondrial respiratory chain complex III assembly
2	BMSK0006701	2.51265	0.250611	114	1942	0.43	0.018	-3.32569	4.87056e-47	7.83283e-43	down	Myc	c-myc isoform X1	Human Diseases;Human Diseases;Human Diseases;Human Diseases;Environmental Information Processing;Environmental Information Processing;Human Diseases;Human Diseases;Human Diseases;Organismal Systems;Cellular Processes;Cellular Processes;Environmental Information Processing;Human Diseases;Environmental Information Processing;Environmental Information Processing;Human Diseases;Human Diseases;Cellula…	Cancers;Infectious diseases;Infectious diseases;Cancers;Signal transduction;Signal transduction;Infectious diseases;Cancers;Cancers;Endocrine system;Cell growth and death;Cell growth and death;Signal transduction;Cancers;Signal transduction;Signal transduction;Infectious diseases;Cancers;Cellular community - eukaryotes;Cancers;Infectious diseases;Cancers;Signal transduction;Cancers;Cancers;Signal…	ko05200//Pathways in cancer;ko05166//HTLV-I infection;ko05169//Epstein-Barr virus infection;ko05205//Proteoglycans in cancer;ko04151//PI3K-Akt signaling pathway;ko04010//MAPK signaling pathway;ko05163//Human cytomegalovirus infection;ko05202//Transcriptional misregulation in cancers;ko05225//Hepatocellular carcinoma;ko04919//Thyroid hormone signaling pathway;ko04110//Cell cycle;ko04218//Cellular …	K04377;K04377;K04377;K04377;K04377;K04377;K04377;K04377;K04377;K04377;K04377;K04377;K04377;K04377;K04377;K04377;K04377;K04377;K04377;K04377;K04377;K04377;K04377;K04377;K04377;K04377;K04377;K04377;K04377;K04377;K04377;K04377	GO:0005634//nucleus;GO:0005737//cytoplasm;GO:0032991//macromolecular complex	GO:0000981//RNA polymerase II transcription factor activity, sequence-specific DNA binding;GO:0003677//DNA binding;GO:0003700//transcription factor activity, sequence-specific DNA binding;GO:0043565//sequence-specific DNA binding;GO:0046983//protein dimerization activity;GO:1990381//ubiquitin-specific protease binding	GO:0006355//regulation of transcription, DNA-templated;GO:0006359//regulation of transcription from RNA polymerase III promoter;GO:0006360//transcription from RNA polymerase I promoter;GO:0008283//cell proliferation;GO:0008286//insulin receptor signaling pathway;GO:0009792//embryo development ending in birth or egg hatching;GO:0009880//embryonic pattern specification;GO:0010506//regulation of aut…
2	BMSK0008872	1.70796	0.288805	114	1942	0.404	0.018	-2.5641	5.59814e-47	9.00293e-43	down	CNPY3	uncharacterized protein LOC101740766	-	-	-	-	GO:0005788//endoplasmic reticulum lumen	GO:0005102//receptor binding	GO:0002224//toll-like receptor signaling pathway;GO:0045087//innate immune response
2	BMSK0004959	3.1862	0.936422	114	1942	0.535	0.06	-1.7666	6.01308e-47	9.67024e-43	down	ATPsynbeta	H+ transporting ATP synthase beta subunit isoform 1	Metabolism;Organismal Systems;Human Diseases;Human Diseases;Human Diseases;Metabolism	Global and overview maps;Environmental adaptation;Neurodegenerative diseases;Neurodegenerative diseases;Neurodegenerative diseases;Energy metabolism	ko01100//Metabolic pathways;ko04714//Thermogenesis;ko05016//Huntington disease;ko05010//Alzheimer disease;ko05012//Parkinson disease;ko00190//Oxidative phosphorylation	K02133;K02133;K02133;K02133;K02133;K02133	GO:0000275//mitochondrial proton-transporting ATP synthase complex, catalytic core F(1);GO:0005739//mitochondrion	GO:0005524//ATP binding;GO:0046933//proton-transporting ATP synthase activity, rotational mechanism;GO:0046961//proton-transporting ATPase activity, rotational mechanism	GO:0015986//ATP synthesis coupled proton transport;GO:1902600//hydrogen ion transmembrane transport
2	BMSK0013506	1.99454	0.0506368	114	1942	0.368	0.005	-5.29973	9.1474e-47	1.47108e-42	down	-	XP 004930824.1 uncharacterized protein LOC101736947	-	-	-	-	-	-	-
2	BMSK0006704	1.7549	0.39778	114	1942	0.421	0.026	-2.14135	1.12237e-46	1.805e-42	down	tfb1m	dimethyladenosine transferase 1, mitochondrial [Amyelois transitella]	-	-	-	-	GO:0005739//mitochondrion	GO:0000179//rRNA (adenine-N6,N6-)-dimethyltransferase activity;GO:0003677//DNA binding;GO:0003723//RNA binding	GO:0031167//rRNA methylation
2	BMSK0006483	2.97337	1.60211	114	1942	0.553	0.089	-0.892125	1.14239e-46	1.8372e-42	down	-	transcription elongation factor spt5	-	-	-	-	-	-	-
2	BMSK0013398	1.69561	0.071949	114	1942	0.36	0.005	-4.55869	1.42271e-46	2.288e-42	down	Lzts2	fez1 isoform X1	-	-	-	-	GO:0005737//cytoplasm;GO:0005813//centrosome;GO:0005874//microtubule;GO:0030496//midbody	-	GO:0000281//mitotic cytokinesis;GO:0010942//positive regulation of cell death;GO:0016055//Wnt signaling pathway;GO:0030178//negative regulation of Wnt signaling pathway;GO:0051013//microtubule severing;GO:0051168//nuclear export;GO:0051255//spindle midzone assembly
2	BMSK0015709	1.74793	0.0367513	114	1942	0.333	0.002	-5.57171	1.51308e-46	2.43333e-42	down	l(2)efl	heat shock protein hsp20.1	Genetic Information Processing;Organismal Systems	Folding, sorting and degradation;Aging	ko04141//Protein processing in endoplasmic reticulum;ko04213//Longevity regulating pathway - multiple species	K09542;K09542	GO:0030018//Z disc;GO:0048471//perinuclear region of cytoplasm	GO:0051082//unfolded protein binding	GO:0007275//multicellular organism development;GO:0009408//response to heat;GO:0010998//regulation of translational initiation by eIF2 alpha phosphorylation;GO:0042026//protein refolding;GO:0045214//sarcomere organization;GO:0061077//chaperone-mediated protein folding
2	BMSK0012697	5.65943	1.99756	114	1942	0.675	0.12	-1.50242	1.71497e-46	2.75801e-42	down	SRRM1	serine/arginine repetitive matrix protein 1 isoform X4	Genetic Information Processing;Genetic Information Processing	Translation;Translation	ko03013//RNA transport;ko03015//mRNA surveillance pathway	K13171;K13171	GO:0005634//nucleus;GO:0005654//nucleoplasm;GO:0005829//cytosol;GO:0016363//nuclear matrix;GO:0016607//nuclear speck;GO:0071013//catalytic step 2 spliceosome	GO:0003677//DNA binding;GO:0003723//RNA binding	GO:0000375//RNA splicing, via transesterification reactions;GO:0000398//mRNA splicing, via spliceosome;GO:0006405//RNA export from nucleus;GO:0006406//mRNA export from nucleus;GO:0008380//RNA splicing;GO:0031124//mRNA 3'-end processing
2	BMSK0006548	4.87839	3.54545	114	1942	0.719	0.217	-0.460436	1.82933e-46	2.94193e-42	down	DDX5	ATP-dependent R helicase dbp2 isoform X1	Genetic Information Processing;Human Diseases;Human Diseases	Transcription;Cancers;Cancers	ko03040//Spliceosome;ko05205//Proteoglycans in cancer;ko05202//Transcriptional misregulation in cancers	K12823;K12823;K12823	GO:0005634//nucleus;GO:0005654//nucleoplasm;GO:0005730//nucleolus;GO:0016020//membrane;GO:0070062//extracellular exosome;GO:0071013//catalytic step 2 spliceosome;GO:1990904//ribonucleoprotein complex	GO:0003723//RNA binding;GO:0003724//RNA helicase activity;GO:0003730//mRNA 3'-UTR binding;GO:0004004//ATP-dependent RNA helicase activity;GO:0005516//calmodulin binding;GO:0005524//ATP binding;GO:0019899//enzyme binding;GO:0035500//MH2 domain binding;GO:0036002//pre-mRNA binding;GO:0043021//ribonucleoprotein complex binding;GO:0046332//SMAD binding;GO:0048306//calcium-dependent protein binding;GO…	GO:0000122//negative regulation of transcription from RNA polymerase II promoter;GO:0000380//alternative mRNA splicing, via spliceosome;GO:0000381//regulation of alternative mRNA splicing, via spliceosome;GO:0000398//mRNA splicing, via spliceosome;GO:0000956//nuclear-transcribed mRNA catabolic process;GO:0001837//epithelial to mesenchymal transition;GO:0006357//regulation of transcription from RN…
2	BMSK0003428	1.86295	0.151906	114	1942	0.368	0.009	-3.61634	2.50197e-46	4.02367e-42	down	-	uncharacterized protein LOC101736946	-	-	-	-	-	-	-
2	BMSK0007817	2.83524	0.805824	114	1942	0.518	0.051	-1.81493	2.70487e-46	4.34998e-42	down	GDI1	rab GDP dissociation inhibitor alpha	-	-	-	-	GO:0005794//Golgi apparatus;GO:0005829//cytosol;GO:0030496//midbody	GO:0005093//Rab GDP-dissociation inhibitor activity;GO:0005096//GTPase activator activity	GO:0015031//protein transport;GO:0032482//Rab protein signal transduction;GO:0050771//negative regulation of axonogenesis;GO:0090315//negative regulation of protein targeting to membrane
2	BMSK0010031	2.17545	0.380918	114	1942	0.439	0.025	-2.51376	2.76662e-46	4.44928e-42	down	-	DH dehydrogenase (ubiquinone) 1 beta subcomplex 10	Metabolism;Organismal Systems;Human Diseases;Human Diseases;Human Diseases;Metabolism;Human Diseases;Organismal Systems	Global and overview maps;Environmental adaptation;Neurodegenerative diseases;Neurodegenerative diseases;Neurodegenerative diseases;Energy metabolism;Endocrine and metabolic diseases;Nervous system	ko01100//Metabolic pathways;ko04714//Thermogenesis;ko05016//Huntington disease;ko05010//Alzheimer disease;ko05012//Parkinson disease;ko00190//Oxidative phosphorylation;ko04932//Non-alcoholic fatty liver disease (NAFLD);ko04723//Retrograde endocannabinoid signaling	K03966;K03966;K03966;K03966;K03966;K03966;K03966;K03966	GO:0005743//mitochondrial inner membrane;GO:0070469//respiratory chain	-	GO:0055114//oxidation-reduction process
2	BMSK0010834	2.53461	1.0189	114	1942	0.518	0.068	-1.31476	5.85553e-46	9.41686e-42	down	-	-	-	-	-	-	-	-	-
2	BMSK0007503	2.18129	0.499343	114	1942	0.447	0.033	-2.12708	6.45621e-46	1.03829e-41	down	LITAF	lipopolysaccharide-induced tumor necrosis factor-alpha factor homolog	Cellular Processes	Transport and catabolism	ko04142//Lysosome	K19363	GO:0000139//Golgi membrane;GO:0005634//nucleus;GO:0005765//lysosomal membrane;GO:0009898//cytoplasmic side of plasma membrane;GO:0098559//cytoplasmic side of early endosome membrane;GO:0098560//cytoplasmic side of late endosome membrane;GO:0098574//cytoplasmic side of lysosomal membrane	GO:0003677//DNA binding;GO:0005125//cytokine activity;GO:0008270//zinc ion binding	GO:0001816//cytokine production;GO:0019953//sexual reproduction
2	BMSK0006833	2.25684	0.486575	114	1942	0.439	0.033	-2.21357	6.57524e-46	1.05743e-41	down	Scarb1	scavenger receptor class B member 3	-	-	-	-	GO:0005737//cytoplasm;GO:0005886//plasma membrane;GO:0005887//integral component of plasma membrane;GO:0005901//caveola;GO:0009986//cell surface;GO:0031528//microvillus membrane;GO:0043231//intracellular membrane-bounded organelle	GO:0001530//lipopolysaccharide binding;GO:0001540//beta-amyloid binding;GO:0001786//phosphatidylserine binding;GO:0001875//lipopolysaccharide receptor activity;GO:0005319//lipid transporter activity;GO:0008035//high-density lipoprotein particle binding;GO:0030169//low-density lipoprotein particle binding;GO:0034186//apolipoprotein A-I binding;GO:0042803//protein homodimerization activity;GO:00705…	GO:0001935//endothelial cell proliferation;GO:0006694//steroid biosynthetic process;GO:0006702//androgen biosynthetic process;GO:0006707//cholesterol catabolic process;GO:0006869//lipid transport;GO:0006910//phagocytosis, recognition;GO:0010867//positive regulation of triglyceride biosynthetic process;GO:0010886//positive regulation of cholesterol storage;GO:0010899//regulation of phosphatidylcho…
2	BMSK0005025	2.1682	0.780162	114	1942	0.465	0.049	-1.47465	7.45523e-46	1.19895e-41	down	-	G protein alpha q isoform X3	Human Diseases;Human Diseases;Human Diseases;Environmental Information Processing;Organismal Systems;Environmental Information Processing;Organismal Systems;Organismal Systems;Environmental Information Processing;Human Diseases;Human Diseases;Organismal Systems;Organismal Systems;Environmental Information Processing;Organismal Systems;Organismal Systems;Organismal Systems;Organismal Systems;Organ…	Cancers;Neurodegenerative diseases;Neurodegenerative diseases;Signal transduction;Nervous system;Signal transduction;Digestive system;Circulatory system;Signal transduction;Infectious diseases;Endocrine and metabolic diseases;Endocrine system;Circulatory system;Signal transduction;Immune system;Nervous system;Endocrine system;Endocrine system;Endocrine system;Cellular community - eukaryotes;Endoc…	ko05200//Pathways in cancer;ko05016//Huntington disease;ko05010//Alzheimer disease;ko04015//Rap1 signaling pathway;ko04723//Retrograde endocannabinoid signaling;ko04020//Calcium signaling pathway;ko04972//Pancreatic secretion;ko04270//Vascular smooth muscle contraction;ko04022//cGMP - PKG signaling pathway;ko05163//Human cytomegalovirus infection;ko04934//Cushing syndrome;ko04921//Oxytocin signal…	K04634;K04634;K04634;K04634;K04634;K04634;K04634;K04634;K04634;K04634;K04634;K04634;K04634;K04634;K04634;K04634;K04634;K04634;K04634;K04634;K04634;K04634;K04634;K04634;K04634;K04634;K04634;K04634;K04634;K04634;K04634;K04634;K04634;K04634;K04634;K04634;K04634;K04634;K04634;K04634;K04634;K04634	-	GO:0001664//G-protein coupled receptor binding;GO:0003924//GTPase activity;GO:0005525//GTP binding;GO:0031683//G-protein beta/gamma-subunit complex binding;GO:0046872//metal ion binding	GO:0007186//G-protein coupled receptor signaling pathway
2	BMSK0014926	6.22726	3.22007	114	1942	0.763	0.189	-0.951504	7.83833e-46	1.26056e-41	down	RAB1A	Ras family	Human Diseases	Infectious diseases	ko05134//Legionellosis	K07874	GO:0005783//endoplasmic reticulum;GO:0005794//Golgi apparatus	GO:0003924//GTPase activity;GO:0005525//GTP binding	GO:0015031//protein transport;GO:0016192//vesicle-mediated transport
2	BMSK0011798	4.40646	1.93984	114	1942	0.64	0.118	-1.18368	8.09009e-46	1.30105e-41	down	COX5B	ABF51371.1 cytochrome c oxidase polypeptide Vb	Metabolism;Organismal Systems;Human Diseases;Human Diseases;Human Diseases;Metabolism;Human Diseases;Organismal Systems	Global and overview maps;Environmental adaptation;Neurodegenerative diseases;Neurodegenerative diseases;Neurodegenerative diseases;Energy metabolism;Endocrine and metabolic diseases;Circulatory system	ko01100//Metabolic pathways;ko04714//Thermogenesis;ko05016//Huntington disease;ko05010//Alzheimer disease;ko05012//Parkinson disease;ko00190//Oxidative phosphorylation;ko04932//Non-alcoholic fatty liver disease (NAFLD);ko04260//Cardiac muscle contraction	K02265;K02265;K02265;K02265;K02265;K02265;K02265;K02265	GO:0005739//mitochondrion;GO:0005743//mitochondrial inner membrane	GO:0004129//cytochrome-c oxidase activity;GO:0046872//metal ion binding	GO:0006123//mitochondrial electron transport, cytochrome c to oxygen;GO:0007585//respiratory gaseous exchange;GO:0042776//mitochondrial ATP synthesis coupled proton transport
2	BMSK0008634	2.089	0.927294	114	1942	0.456	0.048	-1.17171	8.83086e-46	1.42018e-41	down	ESD	S-formylglutathione hydrolase [Papilio machaon]	Metabolism	Global and overview maps	ko01200//Carbon metabolism	K01070	GO:0005829//cytosol;GO:0031410//cytoplasmic vesicle	GO:0018738//S-formylglutathione hydrolase activity;GO:0042802//identical protein binding;GO:0052689//carboxylic ester hydrolase activity	GO:0046294//formaldehyde catabolic process
2	BMSK0013519	2.45062	1.22203	114	1942	0.482	0.056	-1.00387	9.3111e-46	1.49741e-41	down	SEM1	XP 004930732.1 26S proteasome complex subunit SEM1	Human Diseases;Genetic Information Processing;Genetic Information Processing	Infectious diseases;Folding, sorting and degradation;Replication and repair	ko05169//Epstein-Barr virus infection;ko03050//Proteasome;ko03440//Homologous recombination	K10881;K10881;K10881	GO:0000502//proteasome complex;GO:0008541//proteasome regulatory particle, lid subcomplex	-	GO:0000724//double-strand break repair via homologous recombination;GO:0006406//mRNA export from nucleus;GO:0043248//proteasome assembly
2	BMSK0001249	6.43494	3.08142	114	1942	0.763	0.183	-1.06233	9.62193e-46	1.5474e-41	down	Gapdh2	glyceraldehyde-3-phosphate dehydrogenase isoform X1	Metabolism;Human Diseases;Metabolism;Metabolism;Environmental Information Processing;Metabolism	Global and overview maps;Neurodegenerative diseases;Global and overview maps;Global and overview maps;Signal transduction;Carbohydrate metabolism	ko01100//Metabolic pathways;ko05010//Alzheimer disease;ko01200//Carbon metabolism;ko01230//Biosynthesis of amino acids;ko04066//HIF-1 signaling pathway;ko00010//Glycolysis / Gluconeogenesis	K00134;K00134;K00134;K00134;K00134;K00134	GO:0005829//cytosol	GO:0004365//glyceraldehyde-3-phosphate dehydrogenase (NAD+) (phosphorylating) activity;GO:0035605//peptidyl-cysteine S-nitrosylase activity;GO:0050661//NADP binding;GO:0051287//NAD binding	GO:0006006//glucose metabolic process;GO:0006096//glycolytic process;GO:0042593//glucose homeostasis
2	BMSK0000274	2.00949	0.467167	114	1942	0.43	0.027	-2.10482	1.16791e-45	1.87823e-41	down	Tpi	TPIS BOMMO RecName: Full=Triosephosphate isomerase; Short=TIM; AltName: Full=Triose-phosphate isomerase	Metabolism;Metabolism;Metabolism;Metabolism;Metabolism;Metabolism	Global and overview maps;Global and overview maps;Global and overview maps;Carbohydrate metabolism;Carbohydrate metabolism;Carbohydrate metabolism	ko01100//Metabolic pathways;ko01200//Carbon metabolism;ko01230//Biosynthesis of amino acids;ko00010//Glycolysis / Gluconeogenesis;ko00562//Inositol phosphate metabolism;ko00051//Fructose and mannose metabolism	K01803;K01803;K01803;K01803;K01803;K01803	-	GO:0004807//triose-phosphate isomerase activity	GO:0006094//gluconeogenesis;GO:0006096//glycolytic process
2	BMSK0011390	2.22438	0.32589	114	1942	0.439	0.024	-2.77095	1.27269e-45	2.04673e-41	down	Dad1	XP 004927391.1 dolichyl-diphosphooligosaccharide--protein glycosyltransferase subunit DAD1	Metabolism;Genetic Information Processing;Metabolism	Global and overview maps;Folding, sorting and degradation;Glycan biosynthesis and metabolism	ko01100//Metabolic pathways;ko04141//Protein processing in endoplasmic reticulum;ko00510//N-Glycan biosynthesis	K12668;K12668;K12668	GO:0008250//oligosaccharyltransferase complex;GO:0012505//endomembrane system;GO:0030176//integral component of endoplasmic reticulum membrane	GO:0004579//dolichyl-diphosphooligosaccharide-protein glycotransferase activity	GO:0006487//protein N-linked glycosylation;GO:0006915//apoptotic process
2	BMSK0007391	3.22358	1.82238	114	1942	0.579	0.097	-0.82284	1.29586e-45	2.08401e-41	down	SEC61G	transport protein SEC61	Genetic Information Processing;Cellular Processes;Human Diseases;Genetic Information Processing	Folding, sorting and degradation;Transport and catabolism;Infectious diseases;Folding, sorting and degradation	ko04141//Protein processing in endoplasmic reticulum;ko04145//Phagosome;ko05110//Vibrio cholerae infection;ko03060//Protein export	K07342;K07342;K07342;K07342	GO:0005789//endoplasmic reticulum membrane;GO:0016021//integral component of membrane	GO:0008565//protein transporter activity;GO:0015450//P-P-bond-hydrolysis-driven protein transmembrane transporter activity	GO:0045047//protein targeting to ER
2	BMSK0008933	1.48648	0.0137382	114	1942	0.316	0.001	-6.75756	1.30654e-45	2.10118e-41	down	Glipr2	SCP-related protein	-	-	-	-	GO:0000139//Golgi membrane;GO:0005615//extracellular space	GO:0042803//protein homodimerization activity	GO:0010634//positive regulation of epithelial cell migration;GO:0010718//positive regulation of epithelial to mesenchymal transition;GO:0070374//positive regulation of ERK1 and ERK2 cascade
2	BMSK0009351	4.04994	1.1044	114	1942	0.553	0.075	-1.87464	1.41469e-45	2.27511e-41	down	Sgsm1	small G protein signaling modulator 2-like isoform X4 [Papilio polytes]	-	-	-	-	GO:0005737//cytoplasm;GO:0005794//Golgi apparatus;GO:0005829//cytosol;GO:0030659//cytoplasmic vesicle membrane	GO:0005096//GTPase activator activity;GO:0017137//Rab GTPase binding	GO:0006886//intracellular protein transport;GO:0045944//positive regulation of transcription from RNA polymerase II promoter;GO:0090630//activation of GTPase activity
2	BMSK0014308	2.60384	0.862898	114	1942	0.482	0.05	-1.59338	2.08056e-45	3.34595e-41	down	TAF10	Transcription initiation factor TFIID subunit 10 [Operophtera brumata]	Human Diseases;Genetic Information Processing	Infectious diseases;Transcription	ko05168//Herpes simplex infection;ko03022//Basal transcription factors	K03134;K03134	GO:0000125//PCAF complex;GO:0005634//nucleus;GO:0005654//nucleoplasm;GO:0005669//transcription factor TFIID complex;GO:0005737//cytoplasm;GO:0030914//STAGA complex;GO:0033276//transcription factor TFTC complex;GO:0048471//perinuclear region of cytoplasm	GO:0003677//DNA binding;GO:0019899//enzyme binding;GO:0030331//estrogen receptor binding;GO:0070063//RNA polymerase binding	GO:0000082//G1/S transition of mitotic cell cycle;GO:0006352//DNA-templated transcription, initiation;GO:0006366//transcription from RNA polymerase II promoter;GO:0006367//transcription initiation from RNA polymerase II promoter;GO:0006915//apoptotic process;GO:0010468//regulation of gene expression;GO:0016578//histone deubiquitination;GO:0016579//protein deubiquitination;GO:0034622//cellular mac…
2	BMSK0002242	2.98031	0.439	114	1942	0.465	0.029	-2.76317	2.99263e-45	4.81274e-41	down	Spase25	signal peptidase complex subunit 2	Genetic Information Processing	Folding, sorting and degradation	ko03060//Protein export	K12947	GO:0005787//signal peptidase complex;GO:0012505//endomembrane system;GO:0016021//integral component of membrane	GO:0008233//peptidase activity	GO:0006465//signal peptide processing;GO:0045047//protein targeting to ER
2	BMSK0002589	1.95112	0.612432	114	1942	0.465	0.044	-1.67168	3.1249e-45	5.02547e-41	down	Asap	arf-GAP with SH3 domain, ANK repeat and PH domain-containing protein 2 isoform X1	Cellular Processes;Organismal Systems	Transport and catabolism;Immune system	ko04144//Endocytosis;ko04666//Fc gamma R-mediated phagocytosis	K12488;K12488	GO:0005634//nucleus;GO:0005737//cytoplasm;GO:0005886//plasma membrane;GO:0005902//microvillus;GO:0045177//apical part of cell	GO:0005096//GTPase activator activity;GO:0046872//metal ion binding;GO:1901981//phosphatidylinositol phosphate binding	GO:0001745//compound eye morphogenesis;GO:0043087//regulation of GTPase activity;GO:1903358//regulation of Golgi organization;GO:1903829//positive regulation of cellular protein localization;GO:1990386//mitotic cleavage furrow ingression
2	BMSK0003202	1.35751	0.173639	114	1942	0.386	0.013	-2.96679	3.52233e-45	5.66461e-41	down	Lsd-2	lipid storage droplet 2-like	Organismal Systems	Endocrine system	ko03320//PPAR signaling pathway	K17284	GO:0005811//lipid particle;GO:0005829//cytosol	-	GO:0006869//lipid transport;GO:0007275//multicellular organism development;GO:0010890//positive regulation of sequestering of triglyceride;GO:0019915//lipid storage;GO:0030730//sequestering of triglyceride;GO:0031887//lipid particle transport along microtubule;GO:0050995//negative regulation of lipid catabolic process;GO:0051049//regulation of transport
2	BMSK0000085	5.1045	2.56835	114	1942	0.675	0.156	-0.990931	4.46192e-45	7.17566e-41	down	PLXDC2	plexin domain-containing protein 2 isoform X1	-	-	-	-	GO:0016021//integral component of membrane	-	-
2	BMSK0011895	13.8912	7.37064	114	1942	0.904	0.29	-0.914312	4.76863e-45	7.66891e-41	down	-	beta-tubulin	Cellular Processes;Cellular Processes;Human Diseases	Transport and catabolism;Cellular community - eukaryotes;Infectious diseases	ko04145//Phagosome;ko04540//Gap junction;ko05130//Pathogenic Escherichia coli infection	K07375;K07375;K07375	GO:0005737//cytoplasm;GO:0005874//microtubule	GO:0003924//GTPase activity;GO:0005200//structural constituent of cytoskeleton;GO:0005525//GTP binding	GO:0007017//microtubule-based process
2	BMSK0001149	3.51051	1.1687	114	1942	0.561	0.075	-1.58678	9.74434e-45	1.56709e-40	down	Hsp60A	60 kDa heat shock protein, mitochondrial	Organismal Systems;Genetic Information Processing;Human Diseases;Human Diseases;Human Diseases	Aging;Folding, sorting and degradation;Infectious diseases;Infectious diseases;Endocrine and metabolic diseases	ko04212//Longevity regulating pathway - worm;ko03018//RNA degradation;ko05152//Tuberculosis;ko05134//Legionellosis;ko04940//Type I diabetes mellitus	K04077;K04077;K04077;K04077;K04077	GO:0005739//mitochondrion;GO:0005743//mitochondrial inner membrane;GO:0005759//mitochondrial matrix;GO:0005829//cytosol	GO:0005524//ATP binding;GO:0051082//unfolded protein binding	GO:0006458//'de novo' protein folding;GO:0006626//protein targeting to mitochondrion;GO:0007005//mitochondrion organization;GO:0008637//apoptotic mitochondrial changes;GO:0034605//cellular response to heat;GO:0042026//protein refolding;GO:0045041//protein import into mitochondrial intermembrane space
2	BMSK0006834	3.09927	1.7297	114	1942	0.561	0.112	-0.84141	9.80006e-45	1.57605e-40	down	D-H2	Hsc70/Hsp90-organizing protein HOP	Human Diseases	Neurodegenerative diseases	ko05016//Huntington disease	K10408	GO:0005858//axonemal dynein complex;GO:0005874//microtubule;GO:0030286//dynein complex;GO:0031514//motile cilium	GO:0003777//microtubule motor activity;GO:0005524//ATP binding;GO:0008569//ATP-dependent microtubule motor activity, minus-end-directed;GO:0045503//dynein light chain binding;GO:0045505//dynein intermediate chain binding;GO:0051959//dynein light intermediate chain binding	GO:0007018//microtubule-based movement;GO:0060285//cilium-dependent cell motility
2	BMSK0011058	2.08284	0.345425	114	1942	0.43	0.025	-2.59211	1.12798e-44	1.81402e-40	down	Amy4N	XP 021208434.1 alpha-amylase 2-like	Metabolism;Organismal Systems;Organismal Systems;Organismal Systems;Metabolism	Global and overview maps;Digestive system;Digestive system;Digestive system;Carbohydrate metabolism	ko01100//Metabolic pathways;ko04972//Pancreatic secretion;ko04970//Salivary secretion;ko04973//Carbohydrate digestion and absorption;ko00500//Starch and sucrose metabolism	K01176;K01176;K01176;K01176;K01176	-	GO:0004556//alpha-amylase activity;GO:0046872//metal ion binding	GO:0005975//carbohydrate metabolic process
2	BMSK0014531	4.82181	2.37761	114	1942	0.658	0.133	-1.02006	1.1585e-44	1.8631e-40	down	-	uncharacterized protein LOC106120002 [Papilio xuthus]	-	-	-	-	-	-	-
2	BMSK0006756	1.8732	0.760718	114	1942	0.447	0.044	-1.30007	1.26966e-44	2.04187e-40	down	PSMA6	proteasome subunit alpha type 6-A	Genetic Information Processing	Folding, sorting and degradation	ko03050//Proteasome	K02730	GO:0000932//cytoplasmic mRNA processing body;GO:0005634//nucleus;GO:0005654//nucleoplasm;GO:0005737//cytoplasm;GO:0005839//proteasome core complex;GO:0005844//polysome;GO:0016363//nuclear matrix;GO:0019773//proteasome core complex, alpha-subunit complex	GO:0003723//RNA binding;GO:0004175//endopeptidase activity;GO:0004298//threonine-type endopeptidase activity;GO:0051059//NF-kappaB binding	GO:0010498//proteasomal protein catabolic process;GO:0010499//proteasomal ubiquitin-independent protein catabolic process;GO:0043161//proteasome-mediated ubiquitin-dependent protein catabolic process;GO:0051092//positive regulation of NF-kappaB transcription factor activity
2	BMSK0002939	5.91051	2.95411	114	1942	0.702	0.173	-1.00056	1.57229e-44	2.52856e-40	down	PTP4A1	protein tyrosine phosphatase type IVA 1	-	-	-	-	GO:0005634//nucleus;GO:0005737//cytoplasm;GO:0005769//early endosome;GO:0005783//endoplasmic reticulum;GO:0005819//spindle;GO:0009898//cytoplasmic side of plasma membrane	GO:0004725//protein tyrosine phosphatase activity;GO:0008138//protein tyrosine/serine/threonine phosphatase activity	GO:0007049//cell cycle;GO:0007275//multicellular organism development;GO:0030335//positive regulation of cell migration
2	BMSK0014645	2.33935	0.49721	114	1942	0.465	0.036	-2.23418	1.9128e-44	3.07616e-40	down	Sec13	Protein transport protein sec13 [Operophtera brumata]	Genetic Information Processing;Genetic Information Processing;Environmental Information Processing	Folding, sorting and degradation;Translation;Signal transduction	ko04141//Protein processing in endoplasmic reticulum;ko03013//RNA transport;ko04150//mTOR signaling pathway	K14004;K14004;K14004	GO:0000139//Golgi membrane;GO:0000785//chromatin;GO:0005654//nucleoplasm;GO:0005703//polytene chromosome puff;GO:0005765//lysosomal membrane;GO:0005789//endoplasmic reticulum membrane;GO:0005815//microtubule organizing center;GO:0005829//cytosol;GO:0030127//COPII vesicle coat;GO:0031080//nuclear pore outer ring;GO:0035859//Seh1-associated complex;GO:0061700//GATOR2 complex	GO:0003682//chromatin binding;GO:0005198//structural molecule activity	GO:0006606//protein import into nucleus;GO:0008363//larval chitin-based cuticle development;GO:0010629//negative regulation of gene expression;GO:0034605//cellular response to heat;GO:0035077//ecdysone-mediated polytene chromosome puffing;GO:0035293//chitin-based larval cuticle pattern formation;GO:0045944//positive regulation of transcription from RNA polymerase II promoter;GO:0051028//mRNA tran…
2	BMSK0009073	4.08295	1.82482	114	1942	0.596	0.109	-1.16185	2.00244e-44	3.22032e-40	down	SmD3	small nuclear ribonucleoprotein Sm D3	Genetic Information Processing;Human Diseases	Transcription;Immune diseases	ko03040//Spliceosome;ko05322//Systemic lupus erythematosus	K11088;K11088	GO:0000243//commitment complex;GO:0005634//nucleus;GO:0005682//U5 snRNP;GO:0005685//U1 snRNP;GO:0005686//U2 snRNP;GO:0005687//U4 snRNP;GO:0005689//U12-type spliceosomal complex;GO:0030532//small nuclear ribonucleoprotein complex;GO:0034715//pICln-Sm protein complex;GO:0034719//SMN-Sm protein complex;GO:0045495//pole plasm;GO:0071011//precatalytic spliceosome;GO:0071013//catalytic step 2 spliceoso…	GO:0003723//RNA binding	GO:0000278//mitotic cell cycle;GO:0000387//spliceosomal snRNP assembly;GO:0000398//mRNA splicing, via spliceosome;GO:0007417//central nervous system development;GO:0007422//peripheral nervous system development;GO:0007517//muscle organ development;GO:0030182//neuron differentiation;GO:0045451//pole plasm oskar mRNA localization;GO:0048477//oogenesis;GO:0048542//lymph gland development
2	BMSK0002128	2.0668	0.814776	114	1942	0.439	0.042	-1.34292	2.10553e-44	3.38612e-40	down	Nedd8	NEDD8	-	-	-	-	GO:0005634//nucleus;GO:0005737//cytoplasm	GO:0031386//protein tag;GO:0031625//ubiquitin protein ligase binding	GO:0007275//multicellular organism development;GO:0008283//cell proliferation;GO:0008589//regulation of smoothened signaling pathway;GO:0019941//modification-dependent protein catabolic process;GO:0030162//regulation of proteolysis;GO:0030431//sleep;GO:0031647//regulation of protein stability;GO:0036099//female germ-line stem cell population maintenance;GO:0045116//protein neddylation;GO:0051438/…
2	BMSK0000350	13.7363	5.21248	114	1942	0.912	0.27	-1.39795	2.1233e-44	3.41469e-40	down	-	Y-box protein	-	-	-	-	GO:0005634//nucleus	GO:0003723//RNA binding	-
2	BMSK0012451	3.0566	0.535007	114	1942	0.491	0.038	-2.5143	2.16417e-44	3.48043e-40	down	HSP90B1	AFG30048.1 heat shock protein 90 beta	Human Diseases;Genetic Information Processing;Environmental Information Processing;Organismal Systems;Human Diseases;Human Diseases;Organismal Systems;Organismal Systems	Cancers;Folding, sorting and degradation;Signal transduction;Endocrine system;Cardiovascular diseases;Cancers;Endocrine system;Immune system	ko05200//Pathways in cancer;ko04141//Protein processing in endoplasmic reticulum;ko04151//PI3K-Akt signaling pathway;ko04915//Estrogen signaling pathway;ko05418//Fluid shear stress and atherosclerosis;ko05215//Prostate cancer;ko04918//Thyroid hormone synthesis;ko04657//IL-17 signaling pathway	K09487;K09487;K09487;K09487;K09487;K09487;K09487;K09487	GO:0005783//endoplasmic reticulum;GO:0005788//endoplasmic reticulum lumen;GO:0042470//melanosome;GO:0048471//perinuclear region of cytoplasm	GO:0005524//ATP binding;GO:0051082//unfolded protein binding	GO:0001666//response to hypoxia;GO:0006457//protein folding;GO:0030433//ER-associated ubiquitin-dependent protein catabolic process
2	BMSK0002723	3.83536	0.61055	114	1942	0.482	0.041	-2.65118	2.55611e-44	4.11073e-40	down	-	delta and Notch-like epidermal growth factor-related receptor isoform X1	-	-	-	-	-	-	-
2	BMSK0004415	2.44475	1.15365	114	1942	0.509	0.075	-1.08348	3.85324e-44	6.19678e-40	down	rad50	D repair protein RAD50	Cellular Processes;Genetic Information Processing;Genetic Information Processing	Cell growth and death;Replication and repair;Replication and repair	ko04218//Cellular senescence;ko03440//Homologous recombination;ko03450//Non-homologous end-joining	K10866;K10866;K10866	GO:0000784//nuclear chromosome, telomeric region;GO:0000790//nuclear chromatin;GO:0000793//condensed chromosome;GO:0000794//condensed nuclear chromosome;GO:0005634//nucleus;GO:0030870//Mre11 complex;GO:0035861//site of double-strand break	GO:0003690//double-stranded DNA binding;GO:0003691//double-stranded telomeric DNA binding;GO:0004017//adenylate kinase activity;GO:0005524//ATP binding;GO:0016887//ATPase activity;GO:0043047//single-stranded telomeric DNA binding;GO:0046872//metal ion binding;GO:0051880//G-quadruplex DNA binding	GO:0000722//telomere maintenance via recombination;GO:0000723//telomere maintenance;GO:0006302//double-strand break repair;GO:0007004//telomere maintenance via telomerase;GO:0008104//protein localization;GO:0016233//telomere capping;GO:0032508//DNA duplex unwinding;GO:0051276//chromosome organization;GO:0070192//chromosome organization involved in meiotic cell cycle;GO:0090305//nucleic acid phosp…
2	BMSK0005709	4.58238	1.90616	114	1942	0.649	0.125	-1.26543	4.62797e-44	7.4427e-40	down	AnxB11	annexin B13b	-	-	-	-	-	GO:0003779//actin binding;GO:0005509//calcium ion binding;GO:0005544//calcium-dependent phospholipid binding	-
2	BMSK0001588	1.21824	0.0076574	114	1942	0.316	0.002	-7.31372	4.89512e-44	7.87233e-40	down	-	hypothetical protein RR46 04711 [Papilio xuthus]	-	-	-	-	-	-	-
2	BMSK0009107	2.57949	1.41035	114	1942	0.518	0.087	-0.871034	5.34967e-44	8.60333e-40	down	Hel25E	ATP-dependent R helicase WM6 [Amyelois transitella]	Genetic Information Processing;Genetic Information Processing;Human Diseases;Genetic Information Processing	Translation;Transcription;Infectious diseases;Translation	ko03013//RNA transport;ko03040//Spliceosome;ko05164//Influenza A;ko03015//mRNA surveillance pathway	K12812;K12812;K12812;K12812	GO:0000346//transcription export complex;GO:0005634//nucleus;GO:0005681//spliceosomal complex;GO:0016607//nuclear speck	GO:0003723//RNA binding;GO:0004004//ATP-dependent RNA helicase activity;GO:0005524//ATP binding	GO:0000381//regulation of alternative mRNA splicing, via spliceosome;GO:0000398//mRNA splicing, via spliceosome;GO:0006338//chromatin remodeling;GO:0006406//mRNA export from nucleus
2	BMSK0013048	3.3619	1.79936	114	1942	0.579	0.108	-0.901789	5.53606e-44	8.90309e-40	down	-	SODC BOMMO RecName: Full=Superoxide dismutase [Cu-Zn]	Human Diseases;Cellular Processes;Organismal Systems;Human Diseases;Human Diseases	Neurodegenerative diseases;Transport and catabolism;Aging;Neurodegenerative diseases;Neurodegenerative diseases	ko05016//Huntington disease;ko04146//Peroxisome;ko04213//Longevity regulating pathway - multiple species;ko05014//Amyotrophic lateral sclerosis (ALS);ko05020//Prion diseases	K04565;K04565;K04565;K04565;K04565	GO:0005737//cytoplasm	GO:0004784//superoxide dismutase activity;GO:0046872//metal ion binding	-
2	BMSK0009297	1.39383	0.0772947	114	1942	0.351	0.007	-4.17254	6.01587e-44	9.67472e-40	down	-	vanin-like protein 2 isoform X1	-	-	-	-	-	GO:0016811//hydrolase activity, acting on carbon-nitrogen (but not peptide) bonds, in linear amides	GO:0006807//nitrogen compound metabolic process
2	BMSK0010860	1.94954	0.428127	114	1942	0.421	0.028	-2.18703	6.75479e-44	1.08631e-39	down	-	DH-ubiquinone oxidoreductase subunit B14.7	Metabolism;Organismal Systems;Human Diseases;Human Diseases;Human Diseases;Metabolism;Human Diseases;Organismal Systems	Global and overview maps;Environmental adaptation;Neurodegenerative diseases;Neurodegenerative diseases;Neurodegenerative diseases;Energy metabolism;Endocrine and metabolic diseases;Nervous system	ko01100//Metabolic pathways;ko04714//Thermogenesis;ko05016//Huntington disease;ko05010//Alzheimer disease;ko05012//Parkinson disease;ko00190//Oxidative phosphorylation;ko04932//Non-alcoholic fatty liver disease (NAFLD);ko04723//Retrograde endocannabinoid signaling	K03956;K03956;K03956;K03956;K03956;K03956;K03956;K03956	-	-	-
2	BMSK0004554	6.96296	2.25987	114	1942	0.737	0.146	-1.62346	8.18025e-44	1.31555e-39	down	Cox6a1	mitochondrial cytochrome c oxidase subunit VIa	Metabolism;Organismal Systems;Human Diseases;Human Diseases;Human Diseases;Metabolism;Human Diseases;Organismal Systems	Global and overview maps;Environmental adaptation;Neurodegenerative diseases;Neurodegenerative diseases;Neurodegenerative diseases;Energy metabolism;Endocrine and metabolic diseases;Circulatory system	ko01100//Metabolic pathways;ko04714//Thermogenesis;ko05016//Huntington disease;ko05010//Alzheimer disease;ko05012//Parkinson disease;ko00190//Oxidative phosphorylation;ko04932//Non-alcoholic fatty liver disease (NAFLD);ko04260//Cardiac muscle contraction	K02266;K02266;K02266;K02266;K02266;K02266;K02266;K02266	GO:0005739//mitochondrion;GO:0005751//mitochondrial respiratory chain complex IV;GO:0043209//myelin sheath	GO:0004129//cytochrome-c oxidase activity;GO:0030234//enzyme regulator activity	GO:0006123//mitochondrial electron transport, cytochrome c to oxygen;GO:0009060//aerobic respiration
2	BMSK0014252	3.1138	0.835416	114	1942	0.518	0.058	-1.89811	1.00018e-43	1.60849e-39	down	CalpA	calpain-A isoform X2	-	-	-	-	GO:0005737//cytoplasm;GO:0015629//actin cytoskeleton;GO:0043025//neuronal cell body	GO:0004198//calcium-dependent cysteine-type endopeptidase activity;GO:0005509//calcium ion binding	GO:0006508//proteolysis;GO:0007520//myoblast fusion;GO:0008340//determination of adult lifespan;GO:0008345//larval locomotory behavior;GO:0009953//dorsal/ventral pattern formation;GO:0016322//neuron remodeling;GO:0016540//protein autoprocessing;GO:0042335//cuticle development;GO:0050832//defense response to fungus
2	BMSK0015907	1.9172	0.0355137	114	1942	0.333	0.004	-5.75448	1.01188e-43	1.62731e-39	down	Mctp	XP 021209292.1 multiple C2 and transmembrane domain-containing protein 1 isoform X4	-	-	-	-	GO:0005789//endoplasmic reticulum membrane;GO:0016021//integral component of membrane	GO:0005509//calcium ion binding	GO:0046928//regulation of neurotransmitter secretion;GO:0048168//regulation of neuronal synaptic plasticity
2	BMSK0015172	2.65177	1.26802	114	1942	0.509	0.076	-1.06437	1.07278e-43	1.72524e-39	down	SmD2	ABK42005.1 small nuclear ribonucleoprotein sm d2	Genetic Information Processing	Transcription	ko03040//Spliceosome	K11096	GO:0005681//spliceosomal complex;GO:0005682//U5 snRNP;GO:0005685//U1 snRNP;GO:0005686//U2 snRNP;GO:0030532//small nuclear ribonucleoprotein complex;GO:0046540//U4/U6 x U5 tri-snRNP complex;GO:0071011//precatalytic spliceosome;GO:0071013//catalytic step 2 spliceosome	GO:0003723//RNA binding	GO:0000278//mitotic cell cycle;GO:0000387//spliceosomal snRNP assembly;GO:0000398//mRNA splicing, via spliceosome
2	BMSK0002883	1.55501	0.574266	114	1942	0.404	0.037	-1.43713	2.00774e-43	3.22884e-39	down	ACP1	acid phosphatase isoenzyme	Metabolism;Cellular Processes;Metabolism;Metabolism	Global and overview maps;Cellular community - eukaryotes;Metabolism of cofactors and vitamins;Metabolism of cofactors and vitamins	ko01100//Metabolic pathways;ko04520//Adherens junction;ko00730//Thiamine metabolism;ko00740//Riboflavin metabolism	K14394;K14394;K14394;K14394	GO:0005737//cytoplasm;GO:0009898//cytoplasmic side of plasma membrane;GO:0070062//extracellular exosome	GO:0003993//acid phosphatase activity;GO:0004725//protein tyrosine phosphatase activity;GO:0004726//non-membrane spanning protein tyrosine phosphatase activity	-
2	BMSK0002717	1.81357	1.1257	114	1942	0.456	0.073	-0.688003	2.80272e-43	4.50733e-39	down	-	casein kinase 2 alpha subunit isoform X1	Human Diseases;Human Diseases;Genetic Information Processing;Environmental Information Processing;Cellular Processes;Human Diseases;Cellular Processes;Environmental Information Processing	Infectious diseases;Infectious diseases;Translation;Signal transduction;Cellular community - eukaryotes;Infectious diseases;Transport and catabolism;Signal transduction	ko05169//Epstein-Barr virus infection;ko05168//Herpes simplex infection;ko03008//Ribosome biogenesis in eukaryotes;ko04310//Wnt signaling pathway;ko04520//Adherens junction;ko05162//Measles;ko04137//Mitophagy - animal;ko04064//NF-kappa B signaling pathway	K03097;K03097;K03097;K03097;K03097;K03097;K03097;K03097	-	GO:0004674//protein serine/threonine kinase activity;GO:0005524//ATP binding	GO:0016055//Wnt signaling pathway
2	BMSK0006250	5.1951	1.92456	114	1942	0.649	0.119	-1.43262	3.6309e-43	5.83921e-39	down	ATPsynD	H+ transporting ATP synthase subunit d	Metabolism;Organismal Systems;Human Diseases;Human Diseases;Human Diseases;Metabolism	Global and overview maps;Environmental adaptation;Neurodegenerative diseases;Neurodegenerative diseases;Neurodegenerative diseases;Energy metabolism	ko01100//Metabolic pathways;ko04714//Thermogenesis;ko05016//Huntington disease;ko05010//Alzheimer disease;ko05012//Parkinson disease;ko00190//Oxidative phosphorylation	K02138;K02138;K02138;K02138;K02138;K02138	GO:0000274//mitochondrial proton-transporting ATP synthase, stator stalk;GO:0000276//mitochondrial proton-transporting ATP synthase complex, coupling factor F(o);GO:0005739//mitochondrion	GO:0015078//hydrogen ion transmembrane transporter activity	GO:0006979//response to oxidative stress;GO:0008340//determination of adult lifespan;GO:0015986//ATP synthesis coupled proton transport;GO:0032007//negative regulation of TOR signaling;GO:0046034//ATP metabolic process;GO:0051881//regulation of mitochondrial membrane potential;GO:0070373//negative regulation of ERK1 and ERK2 cascade;GO:1902600//hydrogen ion transmembrane transport
2	BMSK0014362	2.48912	1.40299	114	1942	0.509	0.078	-0.827128	4.28958e-43	6.89851e-39	down	SmD1	ABF51325.1 small nuclear ribonucleoprotein Sm D1	Genetic Information Processing;Human Diseases	Transcription;Immune diseases	ko03040//Spliceosome;ko05322//Systemic lupus erythematosus	K11087;K11087	GO:0000243//commitment complex;GO:0005634//nucleus;GO:0005681//spliceosomal complex;GO:0005682//U5 snRNP;GO:0005685//U1 snRNP;GO:0005686//U2 snRNP;GO:0005687//U4 snRNP;GO:0005689//U12-type spliceosomal complex;GO:0005829//cytosol;GO:0030532//small nuclear ribonucleoprotein complex;GO:0034715//pICln-Sm protein complex;GO:0034719//SMN-Sm protein complex;GO:0071011//precatalytic spliceosome;GO:00710…	GO:0003723//RNA binding	GO:0000387//spliceosomal snRNP assembly;GO:0000398//mRNA splicing, via spliceosome
2	BMSK0003359	1.93326	0.453211	114	1942	0.412	0.03	-2.09278	5.28304e-43	8.49618e-39	down	-	uncharacterized protein LOC106104211 [Papilio polytes]	-	-	-	-	-	-	-
2	BMSK0002142	5.95208	2.95084	114	1942	0.728	0.176	-1.01227	6.3667e-43	1.02389e-38	down	SmB	small nuclear ribonucleoprotein polypeptide isoform X1	Genetic Information Processing;Human Diseases	Transcription;Immune diseases	ko03040//Spliceosome;ko05322//Systemic lupus erythematosus	K11086;K11086	GO:0005634//nucleus;GO:0005681//spliceosomal complex;GO:0005682//U5 snRNP;GO:0005685//U1 snRNP;GO:0005686//U2 snRNP;GO:0005687//U4 snRNP;GO:0005737//cytoplasm;GO:0015030//Cajal body;GO:0030532//small nuclear ribonucleoprotein complex;GO:0045495//pole plasm;GO:0046540//U4/U6 x U5 tri-snRNP complex;GO:0071004//U2-type prespliceosome;GO:0071011//precatalytic spliceosome;GO:0071013//catalytic step 2 …	GO:0003723//RNA binding	GO:0000398//mRNA splicing, via spliceosome;GO:0007281//germ cell development;GO:0007283//spermatogenesis;GO:0008406//gonad development
[truncated: 497 more rows]

## Sheet: 3
Cluster	GeneID	CK	BmNPV	cells.1	cells.2	pct.1	pct.2	log2FC	p_value	p_val_adjust	significance	Symbol	Description	KEGG_A_class	KEGG_B_class	Pathway	K_ID	GO Component	GO Function	GO Process
[truncated: 117 more rows]

[truncated: 10 more sheets: 4, 5, 6, 7, 8, 10, 11, 14, 15, 19]
